# Supplementary material for: P-Stereogenic Ir-MaxPHOX: A Step toward Privileged Catalysts for Asymmetric Hydrogenation of Nonchelating Olefins
Source: PubMed Central journal article supplement (PMC9990153; doi:10.1021/acscatal.2c05579), 2023-02-14
Supplement: cs2c05579_si_001.pdf [file cs2c05579_si_001.pdf]

# P-Stereogenic Ir-MaxPHOX: a step towards privileged catalysts for asymmetric hydrogenation of non-chelating olefins

*Maria Biosca,<sup>a</sup> Pol de la Cruz-Sánchez,<sup>a</sup> Jorge Faiges,<sup>a</sup> Jèssica Margalef,<sup>a</sup> Ernest Salomó,<sup>b</sup> Antoni Riera,<sup>b,c</sup> Xavier Verdaguer,<sup>\*,b,c</sup> Joan Ferré,<sup>d</sup> Feliu Maseras,<sup>e</sup> Maria Besora<sup>\*,a</sup> Oscar Pàmies<sup>a</sup> and Montserrat Diéguez<sup>\*,a</sup>*

<sup>a</sup> Departament de Química Física i Inorgànica, Universitat Rovira i Virgili, C/ Marcel·lí Domingo, 1, 43007 Tarragona, Spain

<sup>b</sup> Institute for Research in Biomedicine (IRB Barcelona), The Barcelona Institute of Science and Technology (BIST), C/Baldiri Reixac, 10, 08028 Barcelona, Spain

<sup>c</sup> Departament de Química Inorgànica i Orgànica, Secció Química Orgànica, Universitat de Barcelona, Martí i Franquès 1, 08028 Barcelona, Spain.

<sup>d</sup> Departament de Química Analítica i Química Orgànica, Universitat Rovira i Virgili, C/ Marcel·lí Domingo, 1, 43007 Tarragona, Spain

<sup>e</sup> Institute of Chemical Research of Catalonia (ICIQ), The Barcelona Institute of Science and Technology, Av. Països Catalans 16, 43007 Tarragona, Spain

\* E-mail for X.V.: xavier.verdaguer@irbbarcelona.org

\* E-mail for M.B.: maria.besora@urv.cat

\* E-mail for M.D.: montserrat.dieguez@urv.cat

## Contents:

|                                                                                                                                      |     |
|--------------------------------------------------------------------------------------------------------------------------------------|-----|
| 1. Hydrogenation experiments using 1,2-propylene carbonate (PC) as solvent. Catalyst recycling.....                                  | 2   |
| 2. Absolute energies and energy corrections.....                                                                                     | 3   |
| 3. Free energy profile for the catalytic cycle.....                                                                                  | 7   |
| 4. Calculated relative energies for the transition states and quadrant model of substrate <b>S83</b> and Ir-catalyst <b>4c</b> ..... | 8   |
| 5. Effect of the DFT functional and basis sets on the computed enantiomeric excess .....                                             | 10  |
| 6. Deuteration experiments.....                                                                                                      | 12  |
| 7. Pressure and catalyst loading effects on the hydrogenation of substrates <b>S83–S86</b> .....                                     | 14  |
| 8. Synthesis of substrates.....                                                                                                      | 15  |
| 9. Characterization details and methods for ee determination of hydrogenated products.....                                           | 22  |
| 10. Cartesian coordinates .....                                                                                                      | 187 |
| 11. References .....                                                                                                                 | 212 |

## Hydrogenation experiments using 1,2-propylene carbonate (PC) as solvent. Catalyst recycling

**Procedure.** The alkene (0.5 mmol) and Ir complex (1 mol%) were dissolved in PC (2 mL) in a high-pressure autoclave, which was purged four times with hydrogen. The apparatus was pressurized to the desired pressure and, after the required reaction time, the autoclave was depressurized. Under a positive stream of argon, the mixture was quickly extracted with hexane (2 mL). To the PC phase the corresponding alkene (0.5 mmol) was added and pressurized back to the desired pressure of hydrogen. The hexane phase was dried over MgSO<sub>4</sub>, diluted with Et<sub>2</sub>O (5 mL), filtered over a celite path and analyzed by GC/MS.

**Table S1.** Hydrogenation experiments with PC as solvent. Catalyst recycling.

| Run | 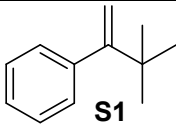 |                   |  |                   |  |                   |
|-----|------------------------------------------------------------------------------------|-------------------|------------------------------------------------------------------------------------|-------------------|--------------------------------------------------------------------------------------|-------------------|
|     | % Conv <sup>a</sup>                                                                | % ee <sup>a</sup> | % Conv <sup>a</sup>                                                                | % ee <sup>a</sup> | % Conv <sup>b</sup>                                                                  | % ee <sup>b</sup> |
| 1   | 100                                                                                | 91 ( <i>R</i> )   | 100                                                                                | 89 ( <i>S</i> )   | 100                                                                                  | 98 ( <i>S</i> )   |
| 2   | 98                                                                                 | 91 ( <i>R</i> )   | 100                                                                                | 88 ( <i>S</i> )   | 96                                                                                   | 98 ( <i>S</i> )   |
| 3   | 92                                                                                 | 91 ( <i>R</i> )   | 94                                                                                 | 88 ( <i>S</i> )   | 93                                                                                   | 98 ( <i>S</i> )   |
| 4   | 85                                                                                 | 90 ( <i>R</i> )   | 92                                                                                 | 88 ( <i>S</i> )   | 86                                                                                   | 96 ( <i>S</i> )   |
| 5   | 80                                                                                 | 91 ( <i>R</i> )   | 83                                                                                 | 88 ( <i>S</i> )   | 79                                                                                   | 97 ( <i>S</i> )   |

<sup>a</sup> Runs carried out using **4c**. <sup>b</sup> Runs carried out using **1b**.

## 2. Absolute energies and energy corrections

### Ir/4c with S2

| Transition State | Electronic energy<br>6-31G**/LANL2DZ<br>(Hartree) | Corrected Gibbs free<br>energy<br>(Hartree) |
|------------------|---------------------------------------------------|---------------------------------------------|
| A                | -1765.625922                                      | -1764.951191                                |
| B                | -1765.641544                                      | -1764.965819                                |
| C                | -1765.640797                                      | -1764.965113                                |
| D                | -1765.633736                                      | -1764.959712                                |
| E                | -1765.630322                                      | -1764.955802                                |
| F                | -1765.626771                                      | -1764.951789                                |
| G                | -1765.632497                                      | -1764.957969                                |
| H                | -1765.645576                                      | -1764.970631                                |
| I                | -1765.633592                                      | -1764.957800                                |
| J                | -1765.625239                                      | -1764.949785                                |
| K                | -1765.638627                                      | -1764.962754                                |
| L                | -1765.648776                                      | -1764.972771                                |
| M                | -1765.625501                                      | -1764.949284                                |
| N                | -1765.642494                                      | -1764.965487                                |
| O                | -1765.645730                                      | -1764.970756                                |
| P                | -1765.636407                                      | -1764.960337                                |

**Ir/4c with S3**

| <b>Transition State</b> | <b>Electronic energy<br/>6-31G**/LANL2DZ<br/>(Hartree)</b> | <b>Corrected Gibbs free<br/>energy<br/>(Hartree)</b> |
|-------------------------|------------------------------------------------------------|------------------------------------------------------|
| <b>A</b>                | -1690.414403                                               | -1689.742158                                         |
| <b>B</b>                | -1690.418792                                               | -1689.746189                                         |
| <b>C</b>                | -1690.423283                                               | -1689.750846                                         |
| <b>D</b>                | -1690.421018                                               | -1689.748476                                         |
| <b>E</b>                | -1690.412647                                               | -1689.740647                                         |
| <b>F</b>                | -1690.414153                                               | -1689.741709                                         |
| <b>G</b>                | -1690.421918                                               | -1689.749874                                         |
| <b>H</b>                | -1690.424761                                               | -1689.751981                                         |
| <b>I</b>                | -1690.413910                                               | -1689.741380                                         |
| <b>J</b>                | -1690.411086                                               | -1689.736832                                         |
| <b>K</b>                | -1690.426316                                               | -1689.752997                                         |
| <b>L</b>                | -1690.425008                                               | -1689.751698                                         |
| <b>M</b>                | -1690.414083                                               | -1689.741601                                         |
| <b>N</b>                | -1690.417874                                               | -1689.744977                                         |
| <b>O</b>                | -1690.430074                                               | -1689.755765                                         |
| <b>P</b>                | -1690.426653                                               | -1689.753341                                         |

**Ir/1b with S3**

| <b>Transition State</b> | <b>Electronic energy<br/>6-31G**/LANL2DZ<br/>(Hartree)</b> | <b>Corrected Gibbs free<br/>energy<br/>(Hartree)</b> |
|-------------------------|------------------------------------------------------------|------------------------------------------------------|
| <b>A</b>                | -1651.107698                                               | -1650.462049                                         |
| <b>B</b>                | -1651.111801                                               | -1650.465863                                         |
| <b>C</b>                | -1651.107318                                               | -1650.462657                                         |
| <b>D</b>                | -1651.103309                                               | -1650.458092                                         |
| <b>E</b>                | -1651.110670                                               | -1650.464409                                         |
| <b>F</b>                | -1651.107933                                               | -1650.461446                                         |
| <b>G</b>                | -1651.103211                                               | -1650.457530                                         |
| <b>H</b>                | -1651.105335                                               | -1650.459179                                         |
| <b>I</b>                | -1651.111522                                               | -1650.465408                                         |
| <b>J</b>                | -1651.107669                                               | -1650.460535                                         |
| <b>K</b>                | -1651.104278                                               | -1650.458346                                         |
| <b>L</b>                | -1651.104112                                               | -1650.459167                                         |
| <b>M</b>                | -1651.114007                                               | -1650.466956                                         |
| <b>N</b>                | -1651.116104                                               | -1650.468633                                         |
| <b>O</b>                | -1651.109109                                               | -1650.462175                                         |
| <b>P</b>                | -1651.103324                                               | -1650.457694                                         |

**Ir/4c with S83**

| <b>Transition State</b> | <b>Electronic energy<br/>6-31G**/LANL2DZ<br/>(Hartree)</b> | <b>Corrected Gibbs free<br/>energy<br/>(Hartree)</b> |
|-------------------------|------------------------------------------------------------|------------------------------------------------------|
| <b>A</b>                | -1882.157260                                               | -1881.433495                                         |
| <b>B</b>                | -1882.161663                                               | -1881.437816                                         |
| <b>C</b>                | -1882.167103                                               | -1881.442736                                         |
| <b>D</b>                | -1882.167998                                               | -1881.444183                                         |
| <b>E</b>                | -1882.157704                                               | -1881.435090                                         |
| <b>F</b>                | -1882.160595                                               | -1881.435390                                         |
| <b>G</b>                | -1882.174032                                               | -1881.450089                                         |
| <b>H</b>                | -1882.168495                                               | -1881.444352                                         |

**Free energy profile for the catalytic cycle**

| <b>Stationary point</b>     | <b>Electronic energy<br/>6-31G**/LANL2DZ<br/>(Hartree)</b> | <b>Corrected Gibbs free<br/>energy<br/>(Hartree)</b> |
|-----------------------------|------------------------------------------------------------|------------------------------------------------------|
| <b>Int1</b>                 | -1262.789051                                               | -1.262.324774                                        |
| <b>Int2<sub>Si</sub></b>    | -1690.452916                                               | -1.689.776507                                        |
| <b>Int2<sub>Re</sub></b>    | -1690.447125                                               | -1.689.772964                                        |
| <b>Int3<sub>Si</sub></b>    | -1690.436842                                               | -1.689.759406                                        |
| <b>Int3<sub>Re</sub></b>    | -1690.437432                                               | -1.689.760679                                        |
| <b>TS1<sub>Si</sub></b>     | -1690.434960                                               | -1.689.757938                                        |
| <b>TS1<sub>Re</sub></b>     | -1690.434985                                               | -1.689.758954                                        |
| <b>Int4<sub>Si</sub></b>    | -1690.475910                                               | -1.689.793555                                        |
| <b>Int4<sub>Re</sub></b>    | -1690.475505                                               | -1.689.799355                                        |
| <b>Int5</b>                 | -1261.601894                                               | -1.261.155451                                        |
| <b>S3</b>                   | -427.627081                                                | -427.446144                                          |
| <b>S3-H<sub>2</sub>-(R)</b> | -428.858515                                                | -428.651469                                          |
| <b>S3-H<sub>2</sub>-(S)</b> | -428.858515                                                | -428.651469                                          |
| <b>H<sub>2</sub></b>        | -1.178654                                                  | -1.179982                                            |

### 3. Free energy profile for the catalytic cycle

From the geometries of the two most stable transition states of tetrasubstituted olefin **S3** with Ir-catalyst **4c** ( $\text{TS}_O$  and  $\text{TS}_P$ ), we calculated the free energy profiles for the migratory insertion catalytic cycle (Scheme S1). The calculations were carried out using the B3LYP<sup>1</sup> functional with the Grimme Dispersion correction (GD3)<sup>2</sup>, the 6-31G(d,p)<sup>3</sup> basis sets were used for all atoms except for iridium for which the LANL2DZ<sup>4</sup> basis sets together with the associated pseudopotential were used. The obtained results agree with the literature<sup>5</sup>, showing that the enantioselectivity is determined in the first hydrogen transfer from the metal to the coordinated olefin.

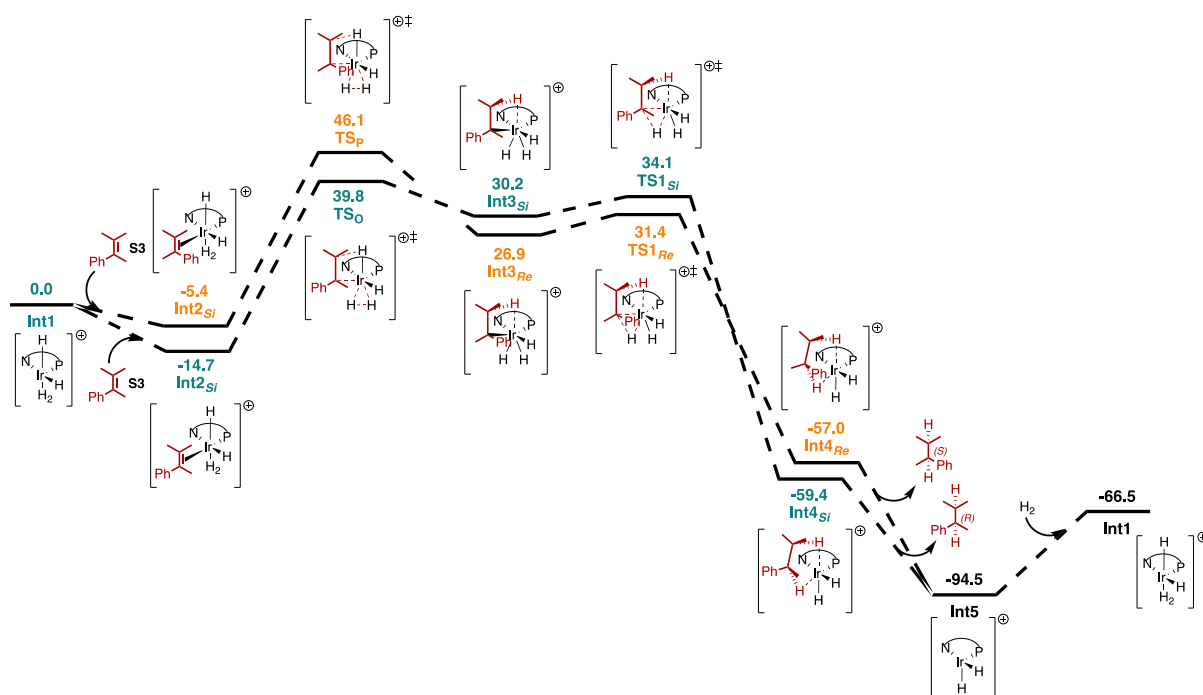

**Scheme S1.** Calculated free energy profile for the migratory insertion catalytic cycle of tetrasubstituted olefin **S3** with Ir-catalyst **4c**. In blue, calculated free energies in solution (kJ/mol) of the pathway that give the (*R*)-product. In orange, calculated free energies in solution (kJ/mol) of the pathway that give the (*S*)-product.

## 4. Calculated relative energies for the transition states and quadrant model of substrate **S83** and Ir-catalyst **4c**

The transition states (TSs) involved in the enantiodetermining step of the reaction for the tetrasubstituted olefin **S83** with catalyst **4c** were located using the B3LYP<sup>1</sup> functional with the Grimme Dispersion correction (GD3)<sup>2</sup>, the 6-31G(d,p)<sup>3</sup> were used as basis sets for all atoms except for iridium for which the LANL2DZ<sup>4</sup> basis sets together with the associated pseudopotential were used. The calculated relative energies for the most stable isomers of the TSs for both pathways (**TS<sub>MI</sub>** and **TS<sub>Meta</sub>**) are shown in Table S2. These key isomers are the result of the relative arrangement of the hydride (up or down) and the coordination of the olefin through the *Re* or *Si* face. In addition, in these calculations we also considered the rotamers of the isopropyl group. As in the previous calculated substrates, the results show that the migratory insertion is the most favorable reaction pathway.

**Table S2.** Calculated relative energies (kJ/mol) for the transition states **TS<sub>MI</sub>** and **TS<sub>Meta</sub>** with substrate **S83** using Ir-catalyst **4c**. Values in blue and bold indicate lowest *Re* and *Si* energy TSs.

| <b>TS<sub>Meta</sub></b>                                                                                                        | <b>4c/S83</b> | <b>TS<sub>MI</sub></b>                                                                                                          | <b>4c/S83</b> |
|---------------------------------------------------------------------------------------------------------------------------------|---------------|---------------------------------------------------------------------------------------------------------------------------------|---------------|
| 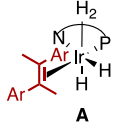<br><b>A</b><br><i>Si</i> -face coordination | 43.6          | <br><b>E</b><br><i>Si</i> -face coordination | 39.4          |
| <br><b>B</b><br><i>Re</i> -face coordination | 32.2          | <br><b>F</b><br><i>Re</i> -face coordination | 38.6          |
| <br><b>C</b><br><i>Si</i> -face coordination | 19.3          | <br><b>G</b><br><i>Si</i> -face coordination | <b>0.0</b>    |
| <br><b>D</b><br><i>Re</i> -face coordination | 15.5          | <br><b>H</b><br><i>Re</i> -face coordination | <b>15.1</b>   |

Relative Gibbs free energies (kJ/mol) in solution (B3LYP-D3/6-31G(d,p)&LANL2DZ) with respect to the corresponding lowest energy transition state; Ar= C<sub>6</sub>H<sub>5</sub>.

Calculations for the tetrasubstituted substrate **S83** with the Ir-catalyst **4c** reproduce the experimental outcome. The favored pathway proceeds via **TS<sub>G</sub>** through the *Si*-face (Table S2) and leads to the formation of the (*R,R*)-product. The energy difference between the two most stable TSs that lead



to opposite enantiomers ( $\text{TS}_G$  and  $\text{TS}_H$ , Table S2), is 15.1 kJ/mol ( $ee_{\text{calc}} = >99\%$  ( $R,R$ )) in agreement with the experimental enantioselectivity (99% ( $R,R$ )).

The observed enantioselectivity can be rationalized by analyzing the structures of the two most stable TSs for the hydrogenation of **S83** ( $\text{TS}_G$  and  $\text{TS}_H$ , Table S2) via quantitative quadrant-diagram representation using the MolQuO software<sup>6</sup>. Figure S1 shows the obtained quadrant diagram supports our previous quadrant model. In this diagram, the oxazoline substituent (<sup>t</sup>Bu) blocks the lower-left quadrant Q3, while the methylenic carbon of the oxazoline partly occupies the upper-left quadrant Q1 making it semi-hindered (Figure S1a). The other two quadrants Q2 and Q4, free from bulky groups, are empty. The diagrams show that the preferred coordination of **S83** is through the *Si*-face, leading to the ( $R,R$ )-product, with one of the olefinic phenyl substituents occupying the most hindered quadrant (Q3, Figure S1b). The lowest TS leading to the minor ( $S,S$ )-product, coordinates the olefin **S83** with a methyl group on the Q3 quadrant (Figure S1c). Again, the planarity of the phenyl substituent makes the TS less crowded in Q3 than with a methyl group. Therefore, the model indicates that again the stereochemical outcome depends on steric factors.

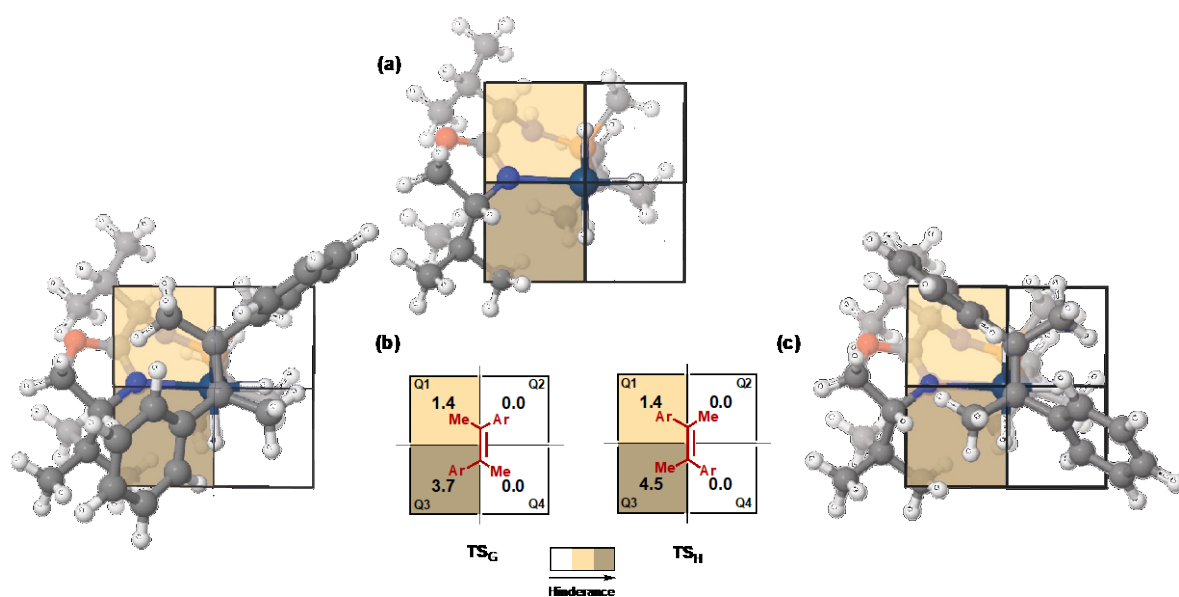

**Figure S1.** Models of the most favored TSs for the asymmetric hydrogenation of **S83** with **4c**; (a) Schematic quadrant model for **4c** (the olefin coordinates above the plane of the paper), (b) The most favorable coordination of **S83** giving the major ( $R,R$ )-product, (c) The most favorable coordination of **S83** giving the minor ( $S,S$ )-product.

## 5. Effect of the DFT functional and basis sets on the computed enantiomeric excess

We have carried single point calculations using larger basis sets, the cc-pVTZ<sup>7,8</sup> basis sets were chosen for all atoms except for Ir for which the cc-pVTZ-PP<sup>9,10</sup> basis were used instead. Also the effect of different DFT functionals (B3LYP-D3, PBE-D2, PBE-D3, BP86-D3, B97D3, M06-D3, MN15L and TPSS-D3) was investigated. We compared these computational results with the experimentally measured ee's and assuming the observed ee correspond mainly to the lowest pro-*S* and the lowest pro-*R* transition states, the experimentally deduced free energy difference between the pro-*S* and pro-*R* was obtained, see Table S3. We investigated catalyst **4c** with substrates **S2**, **S3** and **S83** and catalyst **1b** with substrate **S3**.

All functionals give values of ee agreeing with the experimental value of > 99 (*R,R*) for catalyst **4c** and substrate **S83**. Also, due to experimentally observed isomerization of olefin **S3** with catalyst **4c**, these results have not been included in Table S3. However, it is to note that all DFT functionals and basis sets predict the formation of the *R* product in agreement with experiments. The DFT predicted enantioselectivity is in all cases higher (57-91% ee (*R*)) than the experimentally observed (31% ee (*R*)), indicating that the observed isomerization very likely has a negative impact in the enantioselectivity and reduces it.

Some differences between functionals appear with catalyst **4c** and substrate **S2** and catalyst **1b** and substrate **S3**. As it can be seen in Table S3, all tested DFT functionals (B3LYP-D3, PBE-D2, PBE-D3, BP86-D3, B97D3 and TPSS-D3) reproduce well the energy differences with errors smaller than 1 kcal.mol<sup>-1</sup>, except for the Minnesota functionals M06-D3 and MN15L that show larger errors. B3LYP-D3 and TPSS-D3 DFT functionals provide fair results but their estimated errors are of about 1 kcal.mol<sup>-1</sup> for the free energy difference between the lowest transition states pro-*S* and pro-*R* for catalyst **1b** and olefin **S3**.

The literature recommended PBE-D2 and PBE-D3 functionals<sup>11</sup> for the study of similar iridium catalysed reactions give overall good results, achieving a very good agreement for catalyst **4c** but slightly over stabilizing the pro-*R* transition state for catalysts **1b**. Instead BP86-D3 and B97D3 functionals show also a good agreement with **4c** but a better agreement for catalyst **1b** with errors smaller than 0.4 kcal.mol<sup>-1</sup>. B97D3 shows overall a better agreement than BP86-D3 and hence we decided to report also the ee's obtained from the single points with the B97D3<sup>12,13</sup> functional and these larger basis sets.

Please note these free energies are obtained as  $G_{SP} = G_{OPT} - E_{OPT} + E_{SP}$ , where  $G_{OPT}$  and  $E_{OPT}$  are respectively the free energies in solution and potential energies in solution obtained at the optimization level (B3LYP-D3/6-31G(d,p) & LANL2DZ) and the  $E_{SP}$  the potential energy in solution obtained from the single point calculation (B97D3/cc-pVTZ & cc-pVTZ-PP).

**Table S3.** Experimentally measured and DFT calculated energies and ee %. Energies correspond to free energies in solution and in kcal.mol<sup>-1</sup> where  $\Delta G = \Delta G(\text{TS pro-}S) - \Delta G(\text{TS pro-}R)$ . Hence, positive values of energy and ee correspond to enantioselective formation of the *S* hydrogenated product and negative values to the formation of the *R* hydrogenated product.

|                                           |              | <b>4c_S2</b> | <b>1b_S3</b> | <b>4c_S83</b>    |
|-------------------------------------------|--------------|--------------|--------------|------------------|
| <b>Experimental measures</b>              | $\Delta G^a$ | <b>1.6</b>   | <b>1.5</b>   | <b>&gt; -3.1</b> |
|                                           | ee %         | <b>88</b>    | <b>85</b>    | <b>&gt; -99</b>  |
| B3LYPD3<br>6-31g(d,p) & LANL2DZ           | $\Delta G$   | 1.3          | 1.1          | -3.6             |
|                                           | ee %         | 79           | 71           | -99.5            |
| B3LYPD3<br>cc-pVTZ & cc-pVTZ-PP           | $\Delta G$   | 0.9          | 0.5          | -3.1             |
|                                           | ee %         | 89           | 38           | -98.9            |
| PBE-D2<br>cc-pVTZ & cc-pVTZ-PP            | $\Delta G$   | 1.1          | 0.7          | -3.5             |
|                                           | ee %         | 71           | 53           | -99.5            |
| PBE-D3<br>cc-pVTZ & cc-pVTZ-PP            | $\Delta G$   | 1.5          | 0.6          | -2.6             |
|                                           | ee %         | 85           | 44           | -98              |
| BP86-D3<br>cc-pVTZ & cc-pVTZ-PP           | $\Delta G$   | 1.3          | 1.5          | -3.8             |
|                                           | ee %         | 79           | 85           | -99.7            |
| <b>B97D3<br/>cc-pVTZ &amp; cc-pVTZ-PP</b> | $\Delta G$   | <b>1.5</b>   | <b>1.1</b>   | <b>-3.2</b>      |
|                                           | ee %         | <b>85</b>    | <b>72</b>    | <b>-99.1</b>     |
| M06<br>cc-pVTZ & cc-pVTZ-PP               | $\Delta G$   | -0.0         | 0.2          | -4.0             |
|                                           | ee %         | -3           | 20           | -99.8            |
| MN15L<br>cc-pVTZ & cc-pVTZ-PP             | $\Delta G$   | 0.4          | 0.7          | -5.5             |
|                                           | ee %         | 33           | 53           | -99.98           |
| TPSSTPSS-D3<br>cc-pVTZ & cc-pVTZ-PP       | $\Delta G$   | 1.1          | 0.5          | -3.0             |
|                                           | ee %         | 71           | 40           | -98.7            |

<sup>a</sup> Difference of free energies between the transition states for the formation of the pro-*S* and the pro-*R* hydrogenation products and assuming participation of a TS pro-*R* and a TS pro-*S*.

## 6. Deuteration experiments

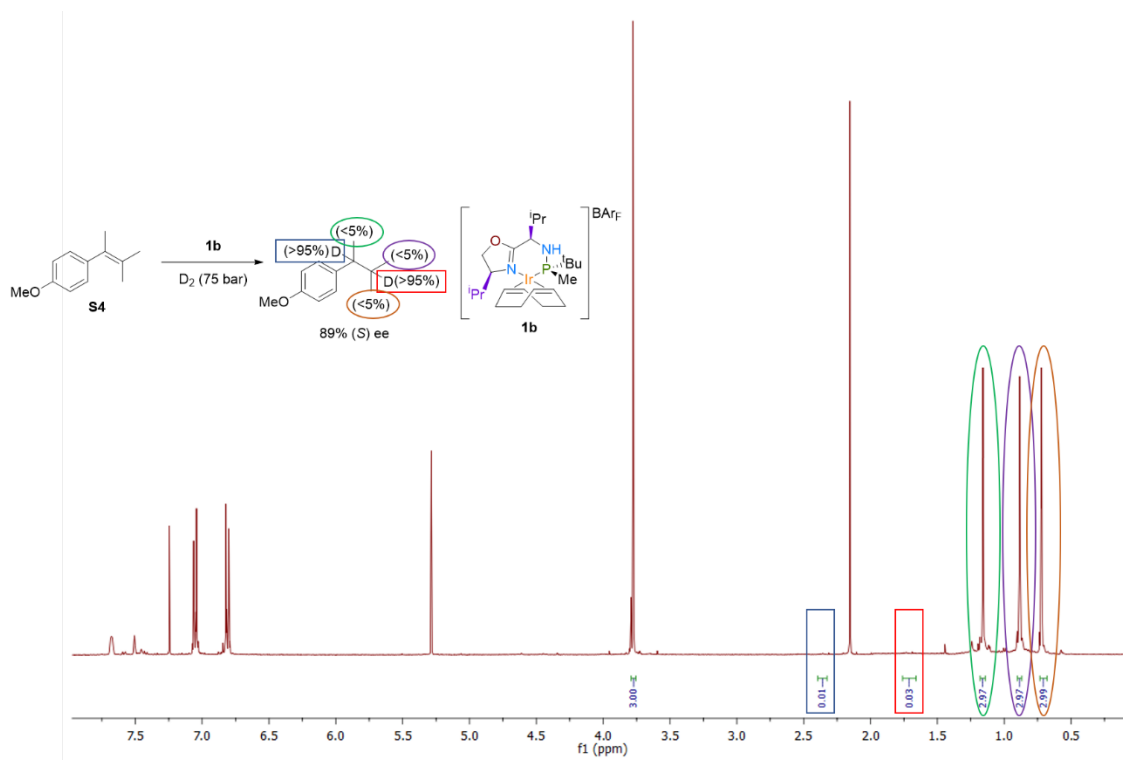

Figure S2.  $^1H$  NMR spectrum of the deuterated product from **S4** with **1b**.

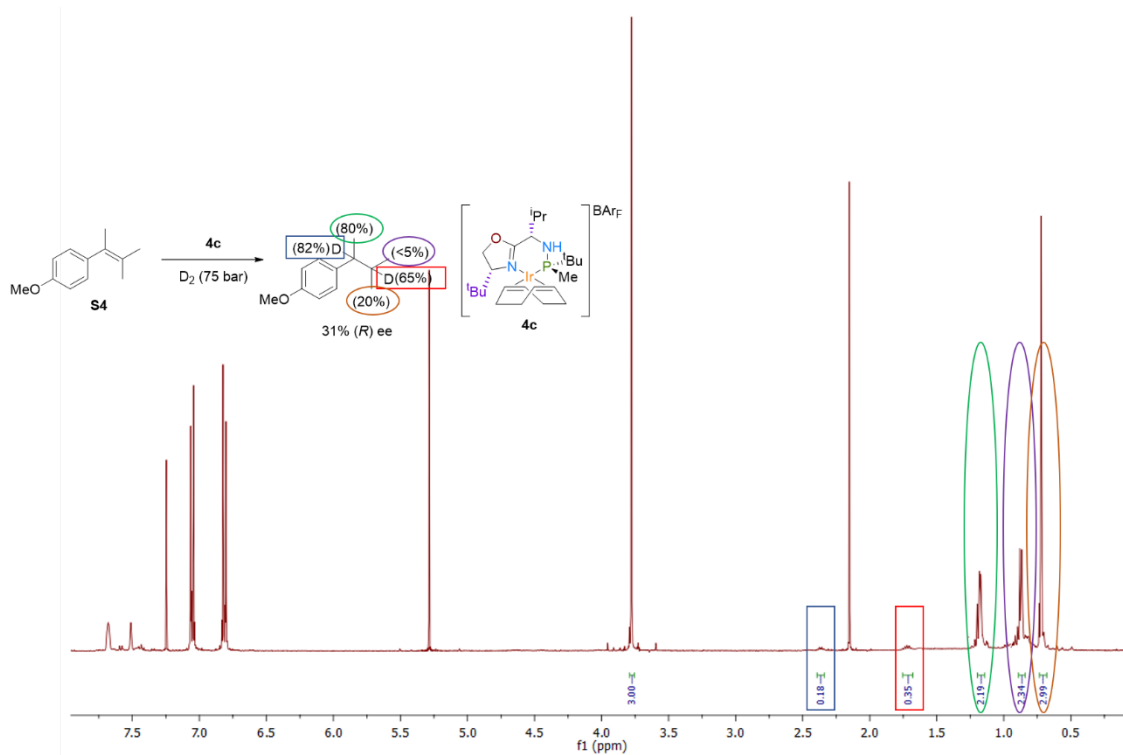

Figure S3.  $^1H$  NMR spectrum of the deuterated product from **S4** with **4c**.

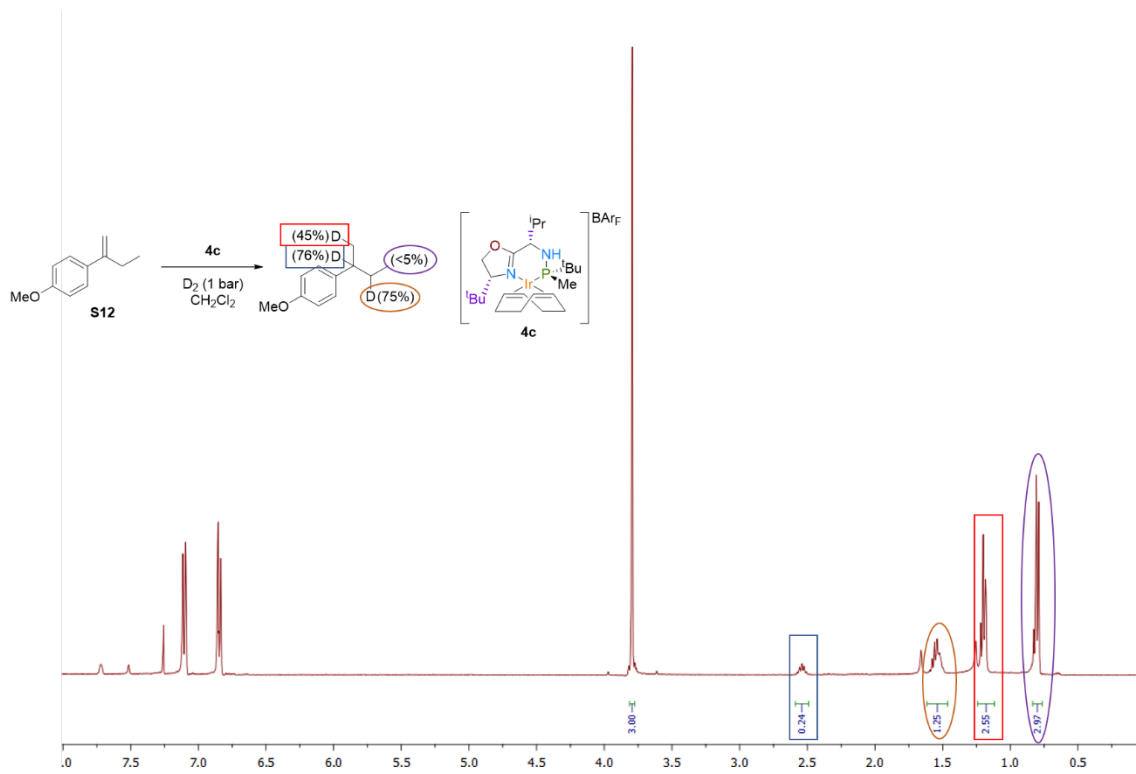

**Figure S4.**  $^1H$  NMR spectrum of the deuterated product from **S12** with **4c**.

## 7. Pressure and catalyst loading effects on the hydrogenation of substrates S83–S86

**Table S4.** Pressure and catalyst loading effects on the hydrogenation of substrates S83–S86.<sup>a</sup>

| Entry | P (bar) | Cat. loading<br>(mol%) | Substrate                                                                           | % Conv <sup>b</sup> | % ee <sup>c</sup> | dr <sup>b</sup> |
|-------|---------|------------------------|-------------------------------------------------------------------------------------|---------------------|-------------------|-----------------|
| 1     | 100     | 2                      | 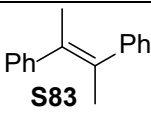   | 100                 | 99 ( <i>R,R</i> ) | >25/1           |
| 2     | 50      | 2                      | S83                                                                                 | 74                  | 99 ( <i>R,R</i> ) | >25/1           |
| 3     | 100     | 1                      | S83                                                                                 | 89                  | 99 ( <i>R,R</i> ) | >25/1           |
| 4     | 100     | 2                      |    | 10                  | >95 ( <i>R</i> )  | na              |
| 5     | 50      | 2                      | S84                                                                                 | <2                  | nd                | na              |
| 6     | 100     | 1                      | S84                                                                                 | 3                   | nd                | na              |
| 7     | 100     | 2                      |  | 79                  | >95 ( <i>R</i> )  | na              |
| 8     | 50      | 2                      | S85                                                                                 | <3                  | nd                | na              |
| 9     | 100     | 1                      | S85                                                                                 | 24                  | >95 ( <i>R</i> )  | na              |
| 10    | 100     | 2                      |  | 92                  | >95 ( <i>R</i> )  | na              |
| 11    | 50      | 2                      | S86                                                                                 | 58                  | >95 ( <i>R</i> )  | na              |
| 12    | 100     | 1                      | S86                                                                                 | 41                  | >95 ( <i>R</i> )  | na              |

<sup>a</sup> Reactions carried out using **4c** in CH<sub>2</sub>Cl<sub>2</sub> at rt for 24 h. <sup>b</sup> Determined by <sup>1</sup>H-NMR. <sup>c</sup> Determined by chiral HPLC. nd= not determined. na= not applicable.

## 8. Synthesis of substrates

Substrates **S1**<sup>14</sup>, **S2**<sup>15</sup>, **S3-S4**<sup>16</sup>, **S5-S11**<sup>14</sup>, **S12**<sup>17</sup>, **S13**<sup>18</sup>, **S15**<sup>18</sup>, **S16-S17**<sup>19</sup>, **S18**<sup>20</sup>, **S19**<sup>21</sup>, **S22-S23**<sup>22</sup>, **S24-S25**<sup>23</sup>, **S26**<sup>22</sup>, **S27-S30**<sup>23</sup>, **S31**<sup>24</sup>, **S32-S35**<sup>25</sup>, **S36**<sup>26</sup>, **S37-S38**<sup>27</sup>, **S41**<sup>28</sup>, **S42-S48**<sup>29</sup>, **S49**<sup>30</sup>, **S50**<sup>31</sup>, **S51**<sup>32</sup>, **S52-S56**<sup>33</sup>, **S57-S61**<sup>32</sup>, **S62**<sup>34</sup>, **S63-S66**<sup>33</sup>, **S67-S68**<sup>32</sup>, **S69-S70**<sup>35</sup>, **S74-S81**<sup>36</sup>, **S82**<sup>37</sup> and **S83-S86**<sup>38</sup> were prepared following the reported procedures and **S14**, **S20**, **S21**, **S39** and **S40** were commercially available.

### Procedure for the preparation of olefins **S71-S73**

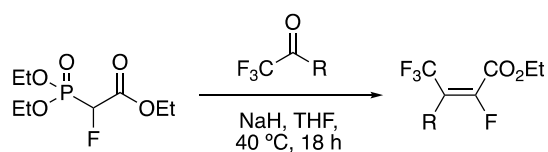

The tetrasubstituted vinyl-fluorides were synthesized according a literature procedure,<sup>35</sup> to a stirred suspension of NaH (1 mmol, 1 equiv., 60 % mineral dispersion) in anhydrous THF (2 mL) at 0 °C corresponding substituted diethoxyphosphoryl-2-fluoroacetate (1.02 mmol, 1.02 equiv.) was added dropwise. The reaction mixture was then heated to 40 °C and stirred for 1 h. After cooling again to 0 °C, the corresponding ketone (1 mmol, 1 equiv.) was added dropwise and the resulting mixture was stirred at 40 °C for another 18 h. After this time, the reaction was quenched with water. The reaction mixture was extracted with diethyl ether (3 x 10 mL). The combined organic layers were dried over Na<sub>2</sub>SO<sub>4</sub>, filtered, and concentrated under reduced pressure. The crude product was purified by flash chromatography using petroleum ether, Et<sub>2</sub>O mixture (95:5) to afford the desired tetrasubstituted vinyl-fluorides.

**Ethyl (*E*)-2,4,4,4-tetrafluoro-3-(*p*-tolyl)but-2-enoate (S71).** Colorless oil.  $^1\text{H}$  NMR ( $\text{CDCl}_3$ ),  $\delta$ : 1.32 (t, 3H,  $J=7.2$  Hz), 2.32 (s, 3H), 4.33 (q, 2H,  $J=7.2$  Hz), 7.16-7.19 (m, 4H).  $^{19}\text{F}$  NMR ( $\text{CDCl}_3$ ),  $\delta$ : -58.51 (d,  $J=10.1$  Hz), -107.39 (q,  $J=9.9$  Hz).  $^{13}\text{C}$  NMR ( $\text{CDCl}_3$ ),  $\delta$ : 13.7, 21.3, 63.0, 118.9, 120.9 (d,  $J=13.8$  Hz), 123.7 (d,  $J=14.0$  Hz), 124.4, 129.0 (d,  $J=2.6$  Hz), 129.3, 139.7, 149.8 (d,  $J=4.6$  Hz), 152.5 (d,  $J=4.5$  Hz), 159.6 (d,  $J=36.0$  Hz).

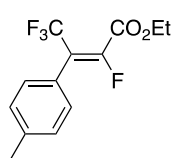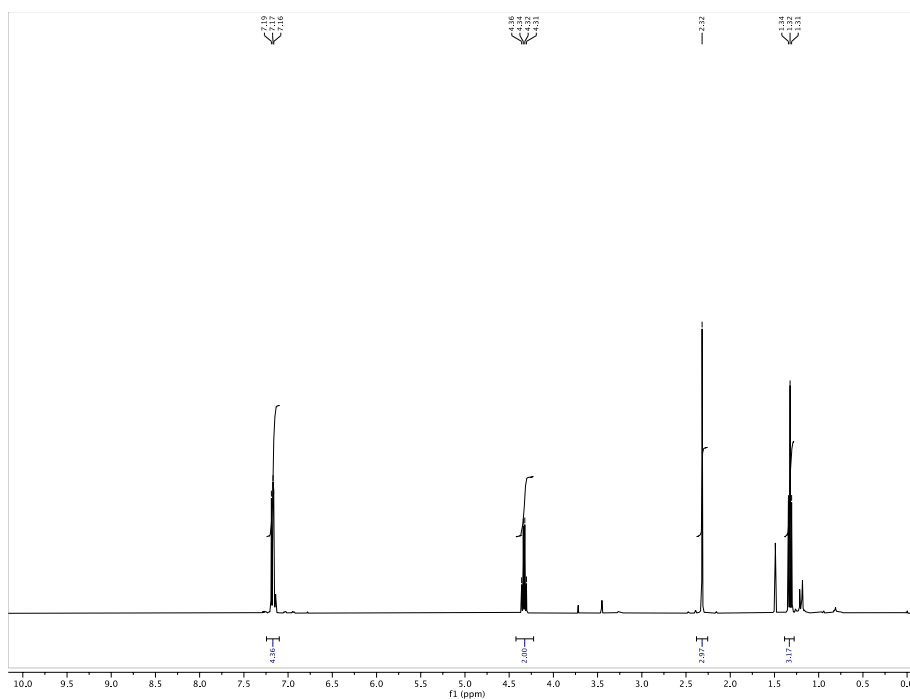

**Figure S5.**  $^1\text{H}$  NMR spectrum of ethyl (*E*)-2,4,4,4-tetrafluoro-3-(*p*-tolyl)but-2-enoate (S71) in  $\text{CDCl}_3$ .



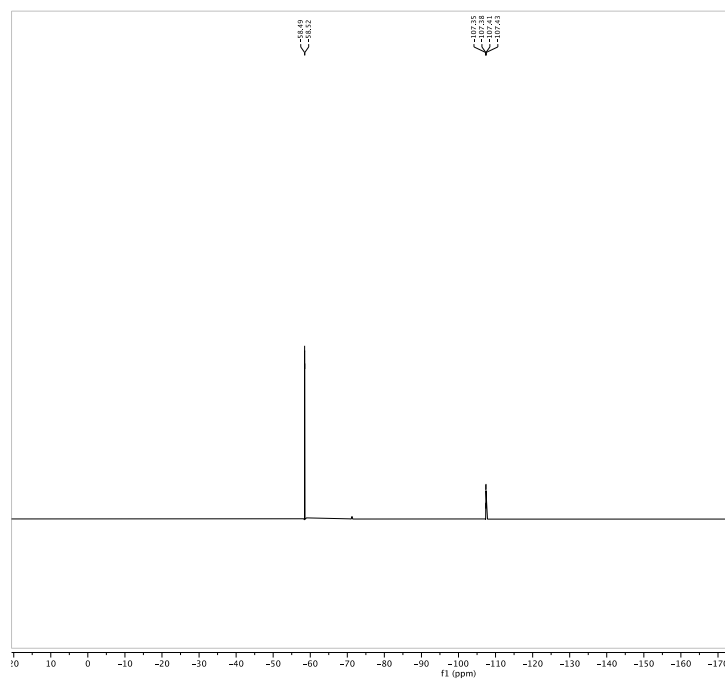

**Figure S6.**  $^{19}\text{F}$  NMR spectrum of ethyl (*E*)-2,4,4,4-tetrafluoro-3-(*p*-tolyl)but-2-enoate (**S71**) in  $\text{CDCl}_3$ .

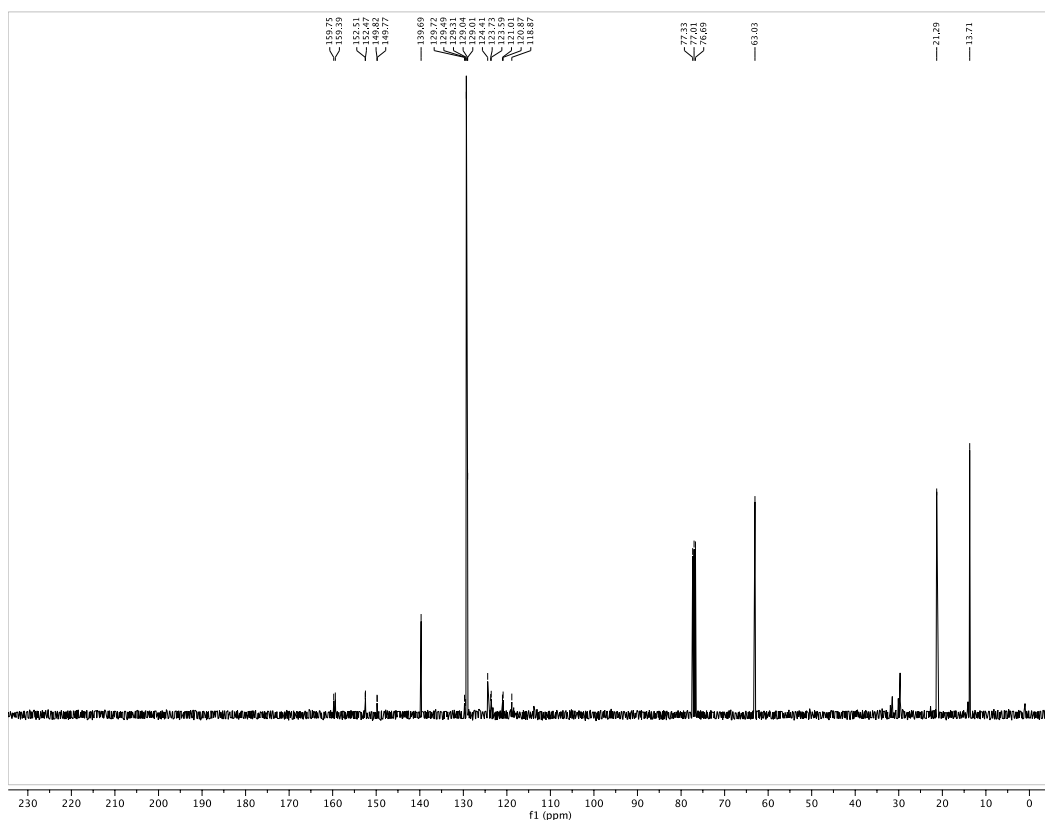

**Figure S7.**  $^{13}\text{C}\{^1\text{H}\}$  NMR spectrum of ethyl (*E*)-2,4,4,4-tetrafluoro-3-(*p*-tolyl)but-2-enoate (**S71**) in  $\text{CDCl}_3$ .

**Ethyl (*E*)-2,4,4,4-tetrafluoro-3-(4-methoxyphenyl)but-2-enoate (S72).** Colorless oil. <sup>1</sup>H NMR (CDCl<sub>3</sub>), δ: 1.32 (t, 3H, *J*= 7.2 Hz), 3.77 (s, 3H), 4.33 (q, 2H, *J*= 7.2 Hz), 6.89 (d, 2H, *J*= 8.9 Hz), 7.20 (d, 2H, *J*= 9.0 Hz). <sup>19</sup>F NMR (CDCl<sub>3</sub>), δ: -58.58 (d, *J*= 9.8 Hz), -107.87 (q, *J*= 10.0 Hz). <sup>13</sup>C NMR (CDCl<sub>3</sub>), δ: 13.7, 55.3, 63.0, 114.1, 118.9-119.4 (m), 121.0 (d, *J*= 13.7 Hz), 123.2, 123.7 (d, *J*= 13.7 Hz), 129.5, 129.7, 130.6 (d, *J*= 2.7 Hz), 149.7 (d, *J*= 4.3 Hz), 152.4 (d, *J*= 4.2 Hz), 159.6 (d, *J*= 36.3 Hz), 160.44.

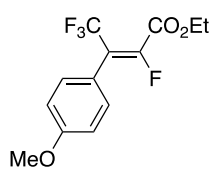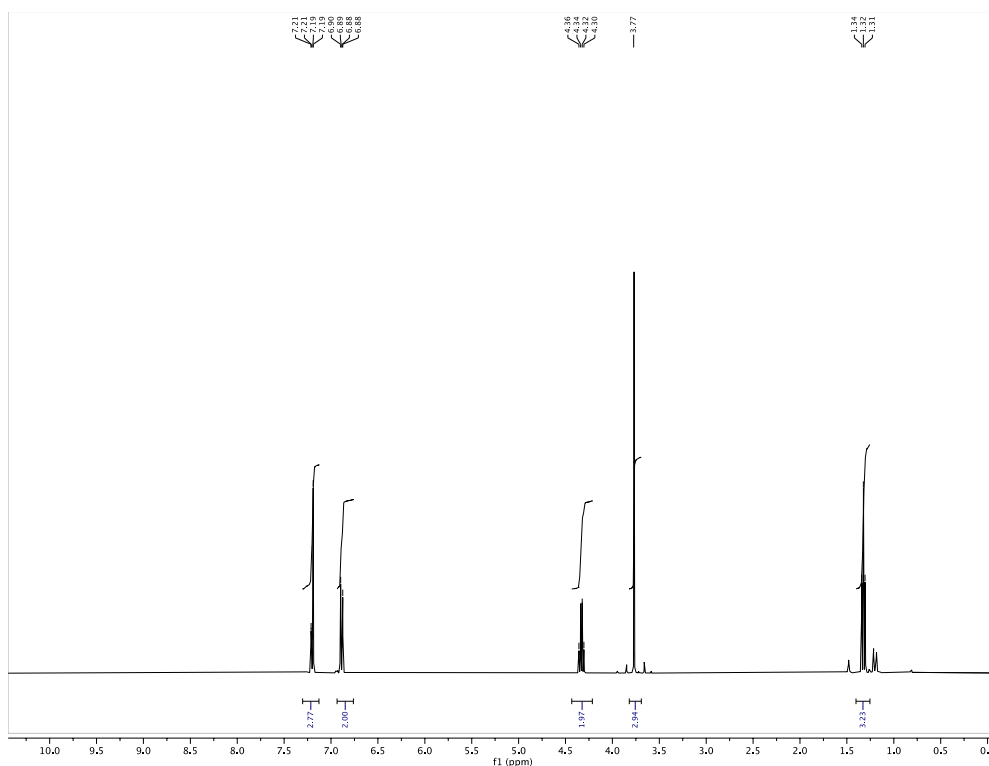

**Figure S8.** <sup>1</sup>H NMR spectrum of ethyl (*E*)-2,4,4,4-tetrafluoro-3-(4-methoxyphenyl)but-2-enoate (S72) in CDCl<sub>3</sub>.

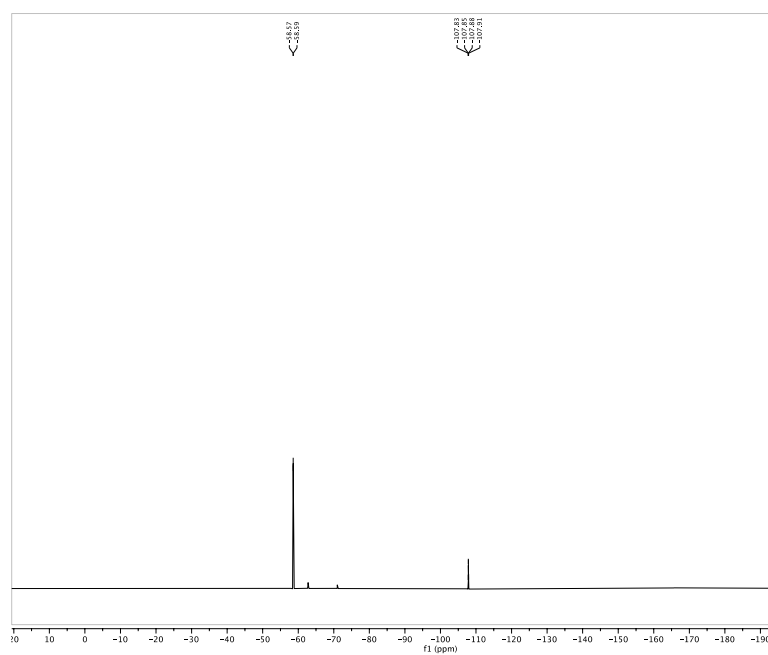

**Figure S9.**  $^{19}\text{F}$  NMR spectrum of ethyl (*E*)-2,4,4,4-tetrafluoro-3-(4-methoxyphenyl)but-2-enoate (**S72**) in  $\text{CDCl}_3$ .

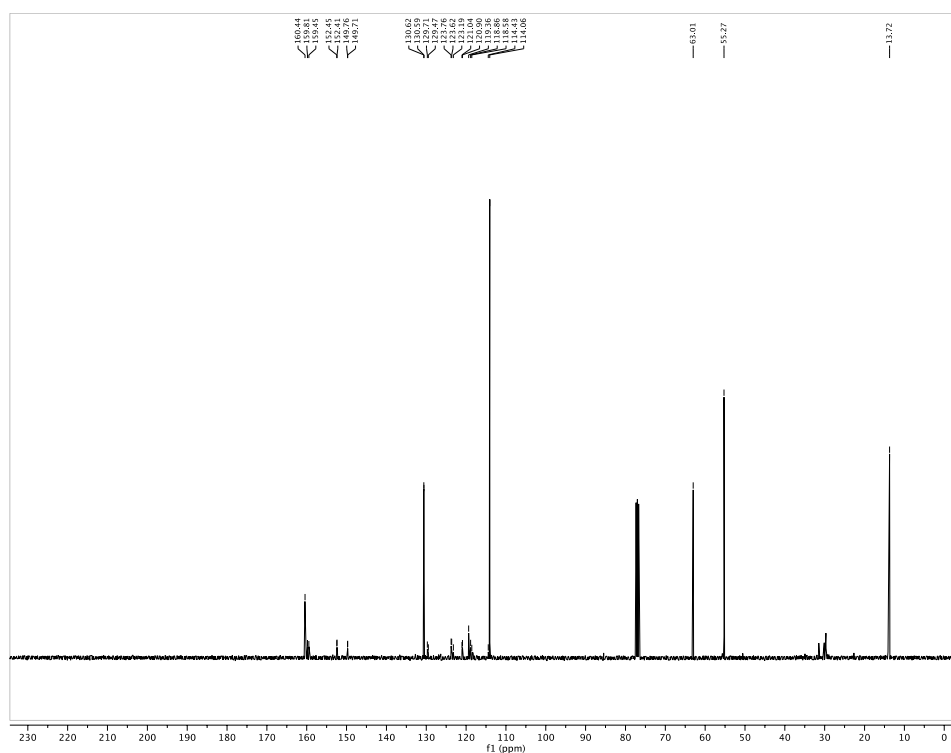

**Figure S10.**  $^{13}\text{C}\{^1\text{H}\}$  NMR spectrum of ethyl (*E*)-2,4,4,4-tetrafluoro-3-(4-methoxyphenyl)but-2-enoate (**S72**) in  $\text{CDCl}_3$ .

**Ethyl (*E*)-3-(4-bromophenyl)-2,4,4,4-tetrafluorobut-2-enoate (S73).** Colorless oil.  $^1\text{H}$  NMR ( $\text{CDCl}_3$ ),  $\delta$ : 1.40 (t, 3H,  $J=7.1$  Hz), 4.41 (q, 2H,  $J=7.1$  Hz), 7.21 (dt, 2H,  $J=8.9$  Hz,  $J=0.6$  Hz), 7.57-7.60 (m, 2H).  $^{19}\text{F}$  NMR ( $\text{CDCl}_3$ ),  $\delta$ : -58.44 (d,  $J=9.8$  Hz), -105.68 (q,  $J=10.2$  Hz).  $^{13}\text{C}$  NMR ( $\text{CDCl}_3$ ),  $\delta$ : 13.8, 63.4, 117.7-118.2 (m), 120.8 (d,  $J=14.0$  Hz), 123.5 (d,  $J=14.0$  Hz), 124.3, 126.4, 130.9 (d,  $J=2.7$  Hz), 132.1, 150.3 (d,  $J=4.2$  Hz), 153.0 (d,  $J=4.3$  Hz), 159.3 (d,  $J=36.0$  Hz).

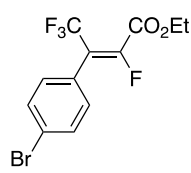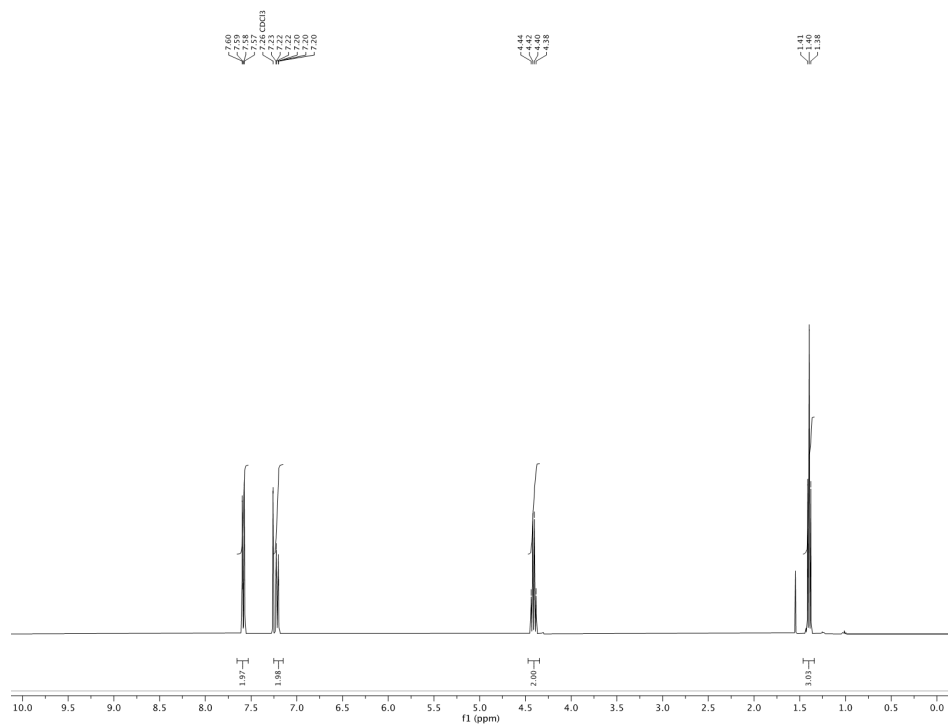

**Figure S11.**  $^1\text{H}$  NMR spectrum of ethyl (*E*)-3-(4-bromophenyl)-2,4,4,4-tetrafluorobut-2-enoate (S73) in  $\text{CDCl}_3$ .

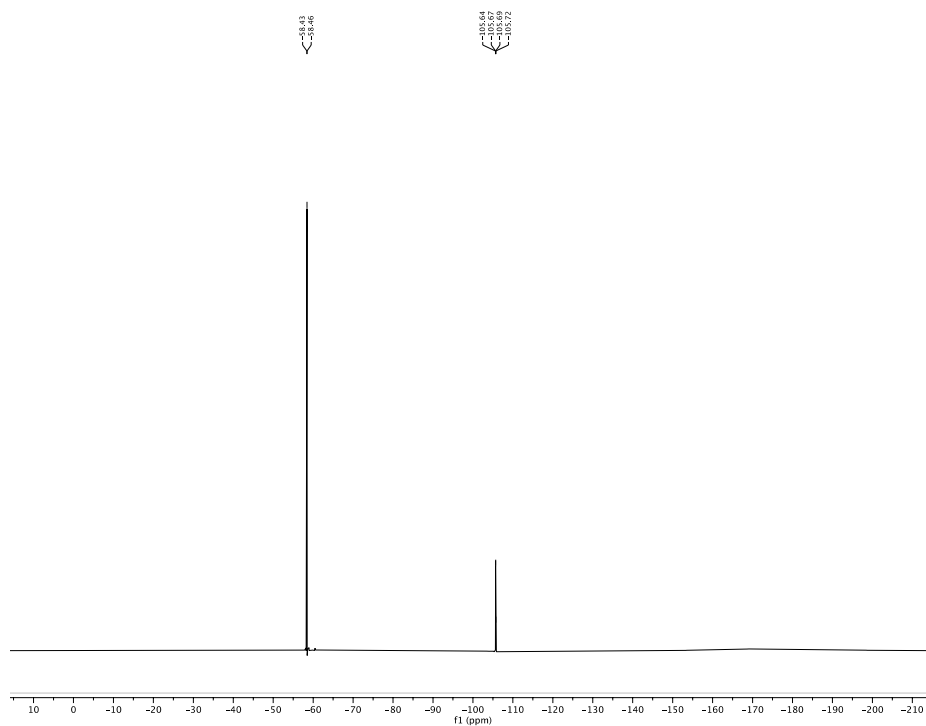

**Figure S12.**  $^{19}\text{F}$  NMR spectrum of ethyl (*E*)-3-(4-bromophenyl)-2,4,4,4-tetrafluorobut-2-enoate (**S73**) in  $\text{CDCl}_3$ .

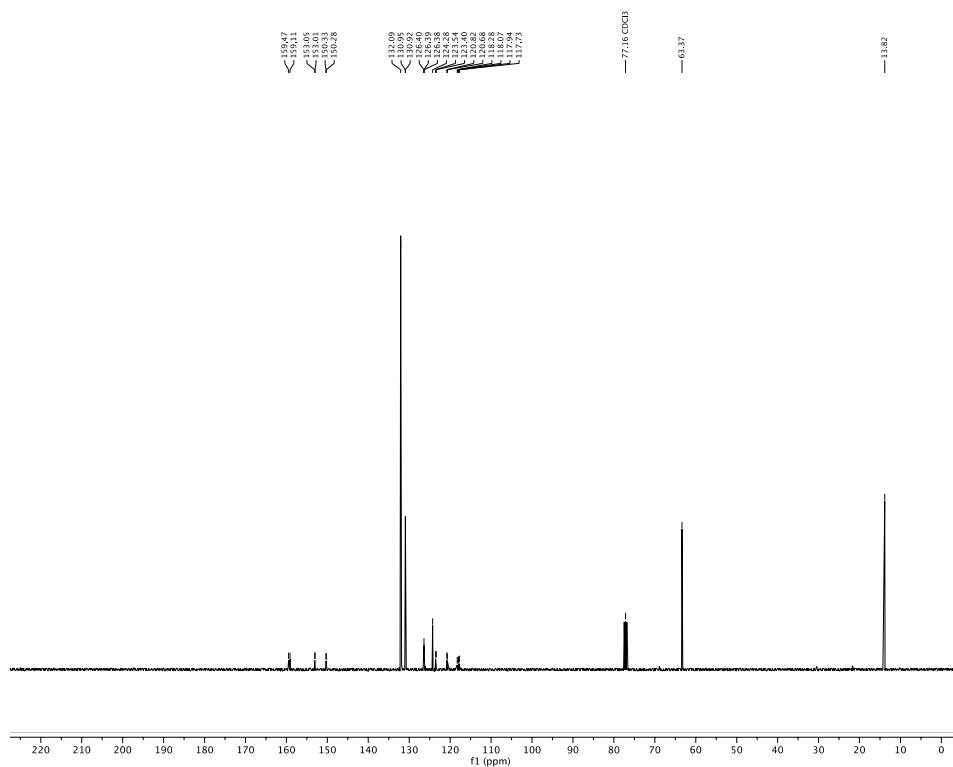

**Figure S13.**  $^{13}\text{C}\{^1\text{H}\}$  NMR spectrum of ethyl (*E*)-3-(4-bromophenyl)-2,4,4,4-tetrafluorobut-2-enoate (**S73**) in  $\text{CDCl}_3$ .

## 9. Characterization details and methods for ee determination of hydrogenated products

(3,3-Dimethylbutan-2-yl)benzene (from S1).<sup>40</sup> Enantiomeric excess determined by GC using Chiradex

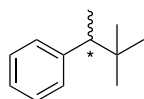

B-DM column (100 kPa H<sub>2</sub>, 60 °C for 30 min, 3 °C/min until 175 °C). t<sub>R</sub> 30.2 min (*S*); t<sub>R</sub> 31.6 min (*R*). <sup>1</sup>H NMR (CDCl<sub>3</sub>), δ: 0.87 (s, 9H), 1.26 (d, 3H, *J*= 7.2 Hz), 2.56 (q, 1H, *J*= 7.2 Hz), 7.15-7.20 (m, 3H), 7.24-7.28 (m, 2H).

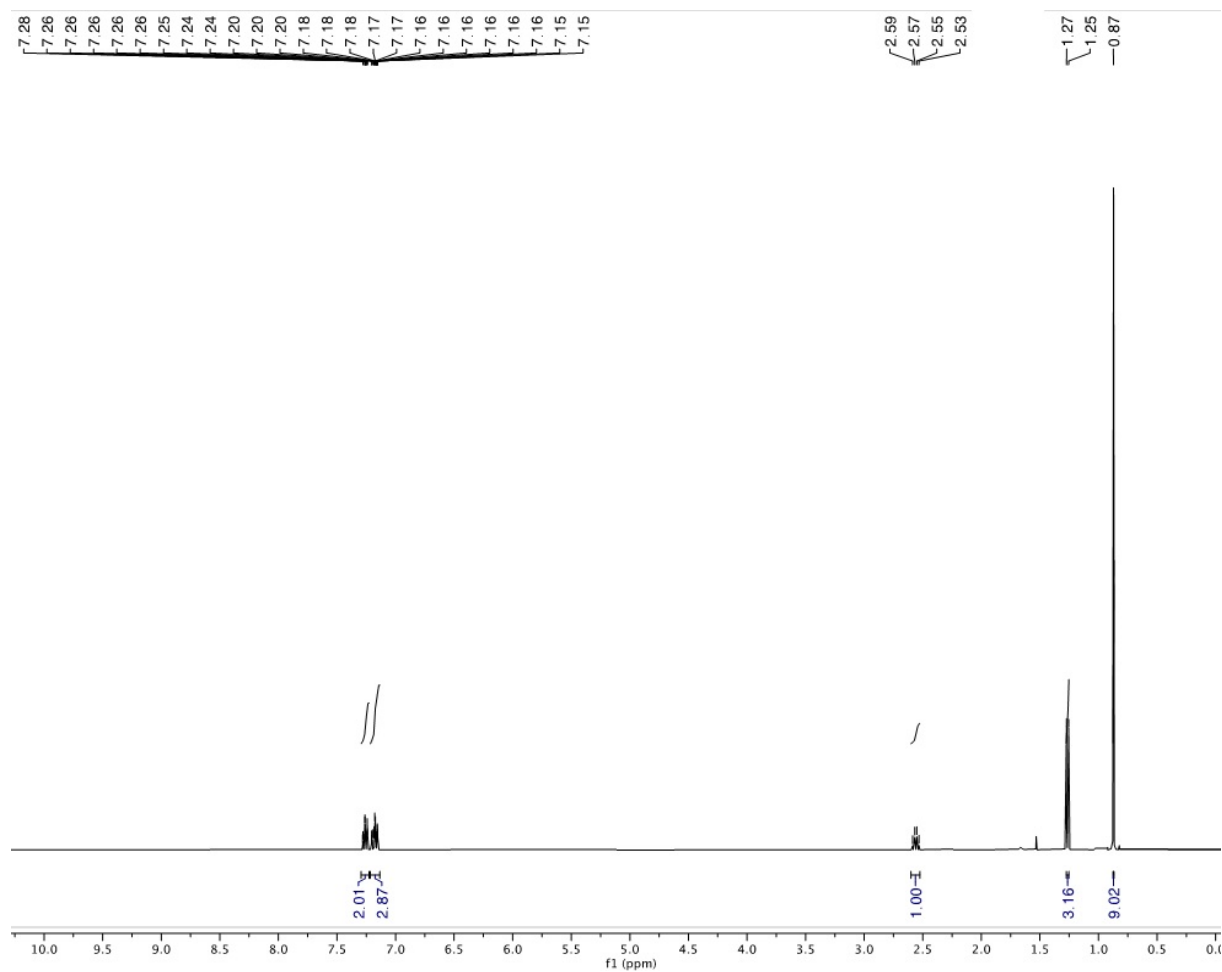

Figure S14. <sup>1</sup>H NMR spectrum of (3,3-dimethylbutan-2-yl)benzene (from S1) in CDCl<sub>3</sub>.

(a)

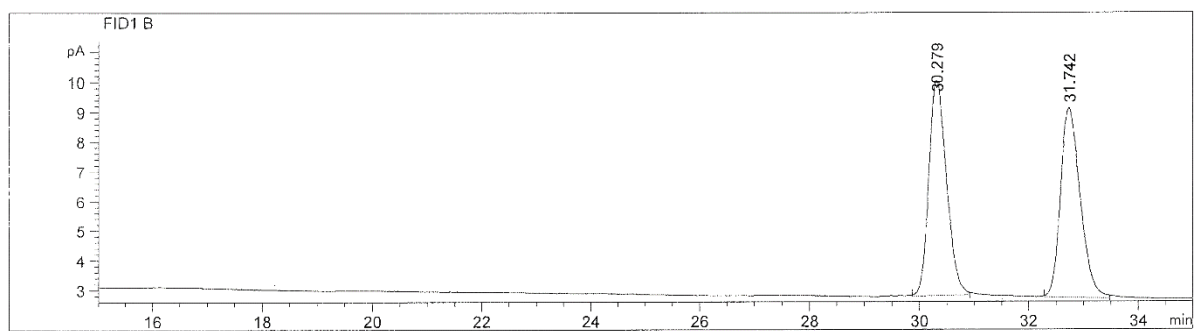

(b)

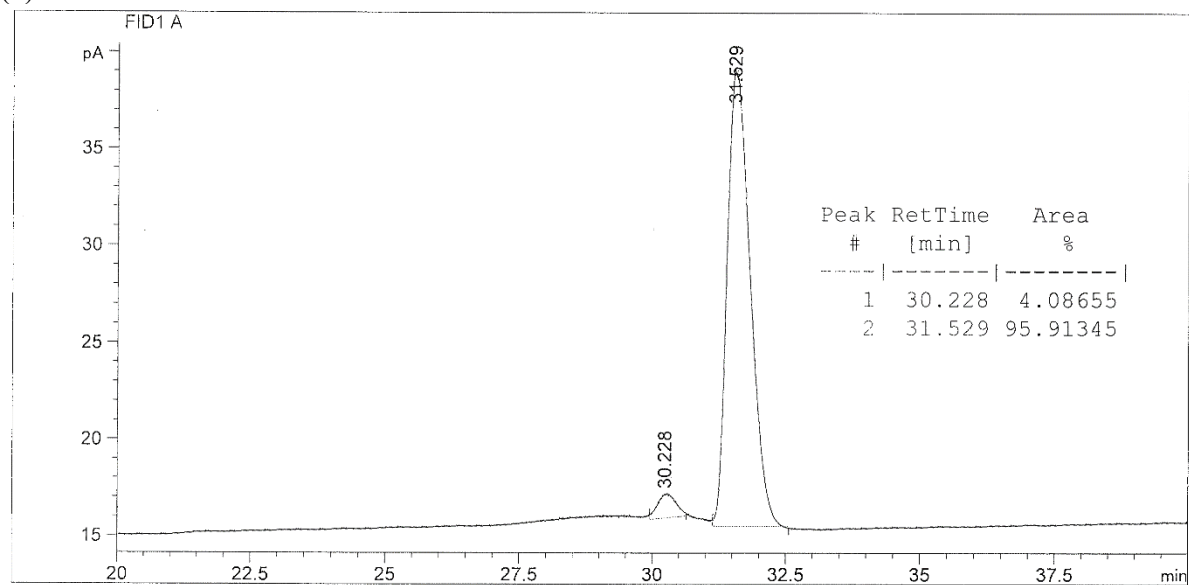

**Figure S15.** GC trace of: (a) racemic and (b) enantioenriched product (91% (*R*) ee using **4c** catalytic system; Table 1, entry 7).

**1-(*sec*-Butyl)-4-methoxybenzene (from S2, S12 and S15).**<sup>40</sup> Enantiomeric excess determined by GC using Chiradex B-DM column (100 kPa H<sub>2</sub>, 60 °C for 30 min, 3 °C/min until 175 °C). *t<sub>R</sub>* 47.1 min (*S*); *t<sub>R</sub>* 47.4 min (*R*). <sup>1</sup>H NMR (CDCl<sub>3</sub>), δ: 0.81 (t, 3H, *J*= 7.4 Hz), 1.21 (d, 3H, *J*= 7.0 Hz), 1.55 (m, 2H), 2.56 (m, 1H), 3.79 (s, 3H), 6.83-6.85 (m, 2H), 7.09-7.11 (m, 2H).

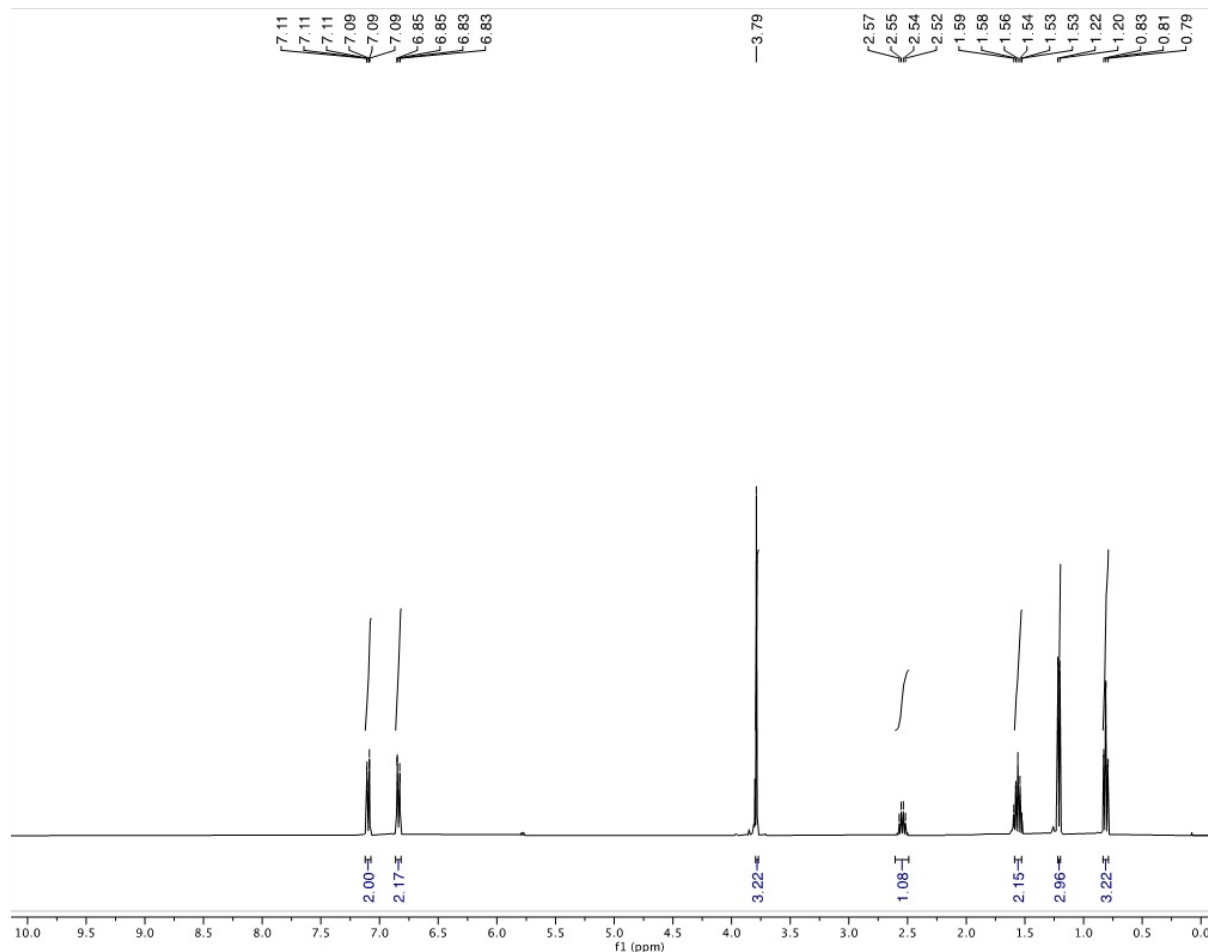

**Figure S16.** <sup>1</sup>H NMR 1-(*sec*-butyl)-4-methoxybenzene (from S2, S12 and S15) in CDCl<sub>3</sub>.



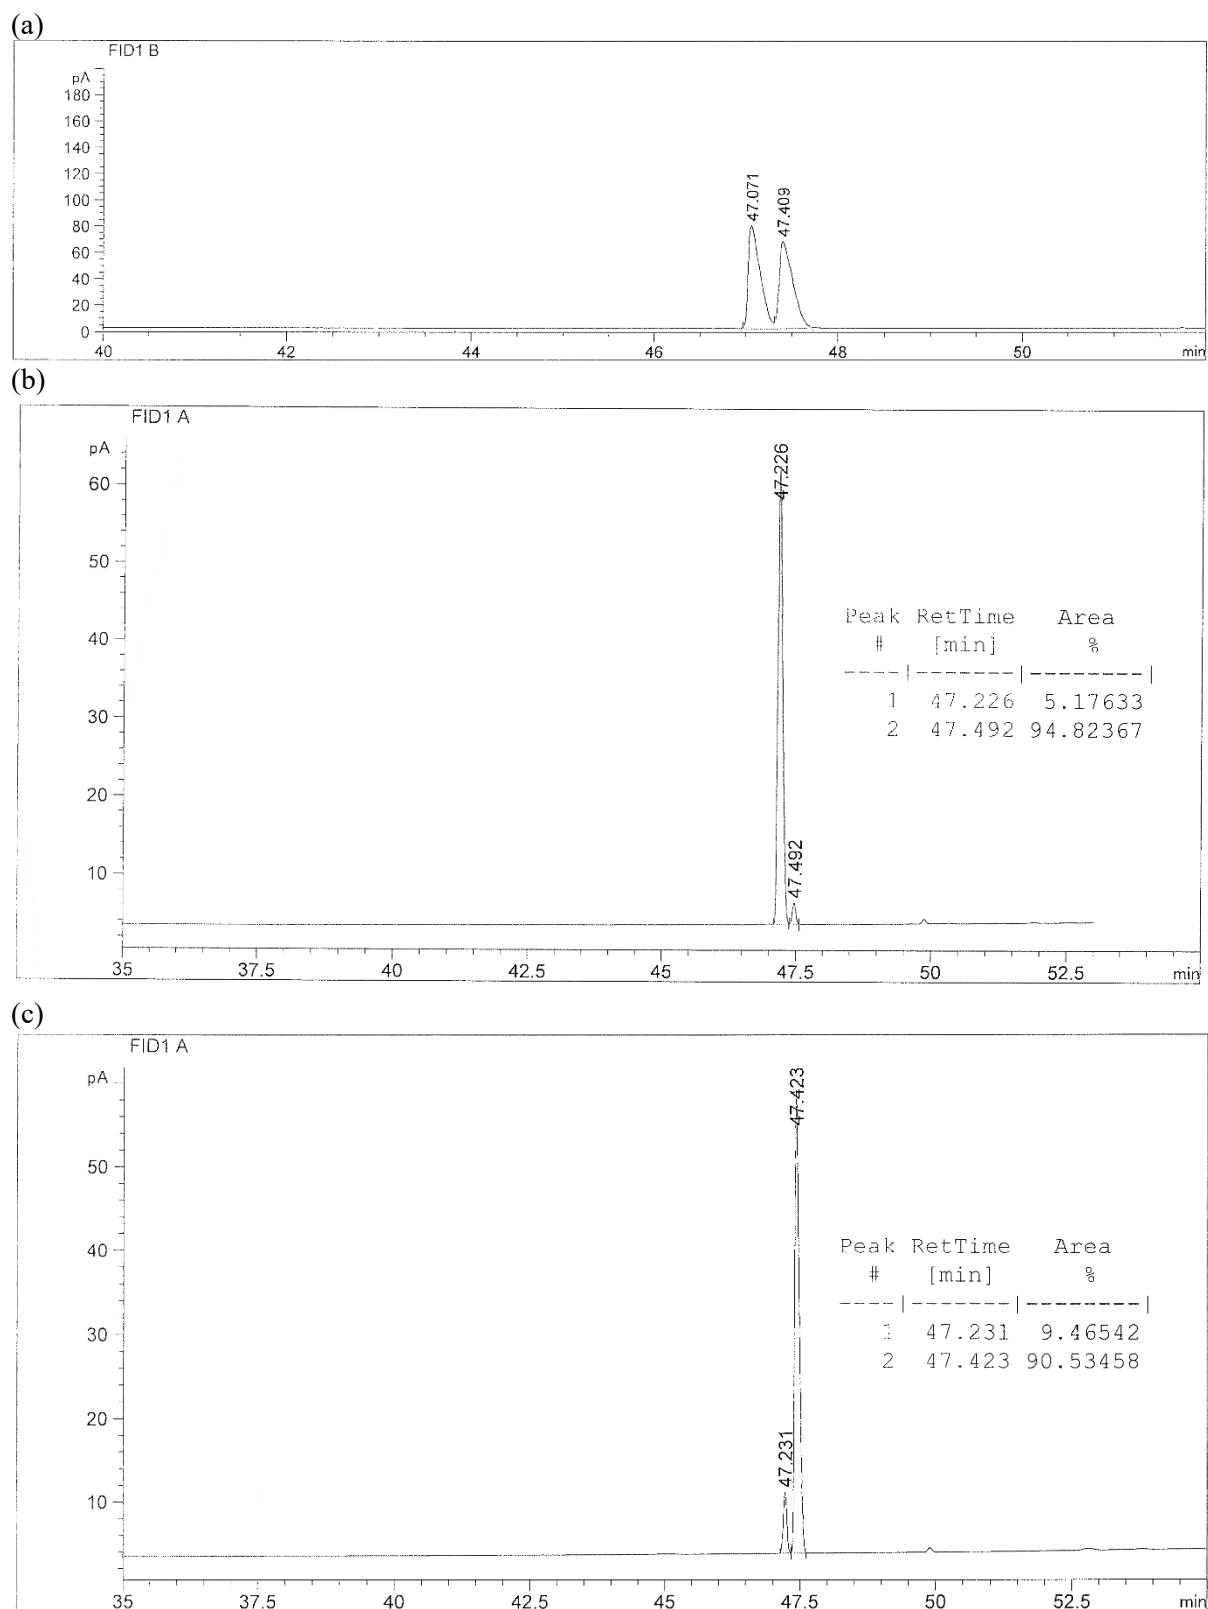

**Figure S17.** GC trace of (a) racemic; (b) enantioenriched product (89% (*S*) ee using **4c** catalytic system; Table 1, entry 9) and (c) enantioenriched product (80% (*R*) ee using **4c** catalytic system; Table 3, entry 8).

**1-(3,3-Dimethylbutan-2-yl)-4-methoxybenzene (from S5).**<sup>14</sup> Enantiomeric excess determined by GC using Chiradex B-DM column (100 kPa H<sub>2</sub>, 60 °C for 30 min, 3 °C/min until 175 °C). *t<sub>R</sub>* 51.5 min (*S*); *t<sub>R</sub>* 51.9 min (*R*). <sup>1</sup>H NMR (CDCl<sub>3</sub>), δ: 0.85 (s, 9H), 1.23 (d, 3H, *J*= 7.2 Hz), 2.51 (q, 1H, *J*= 7.2 Hz), 3.79 (s, 3H), 6.81 (d, 2H, *J*= 8.7 Hz), 7.08 (d, 2H, *J*= 8.6 Hz).

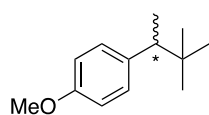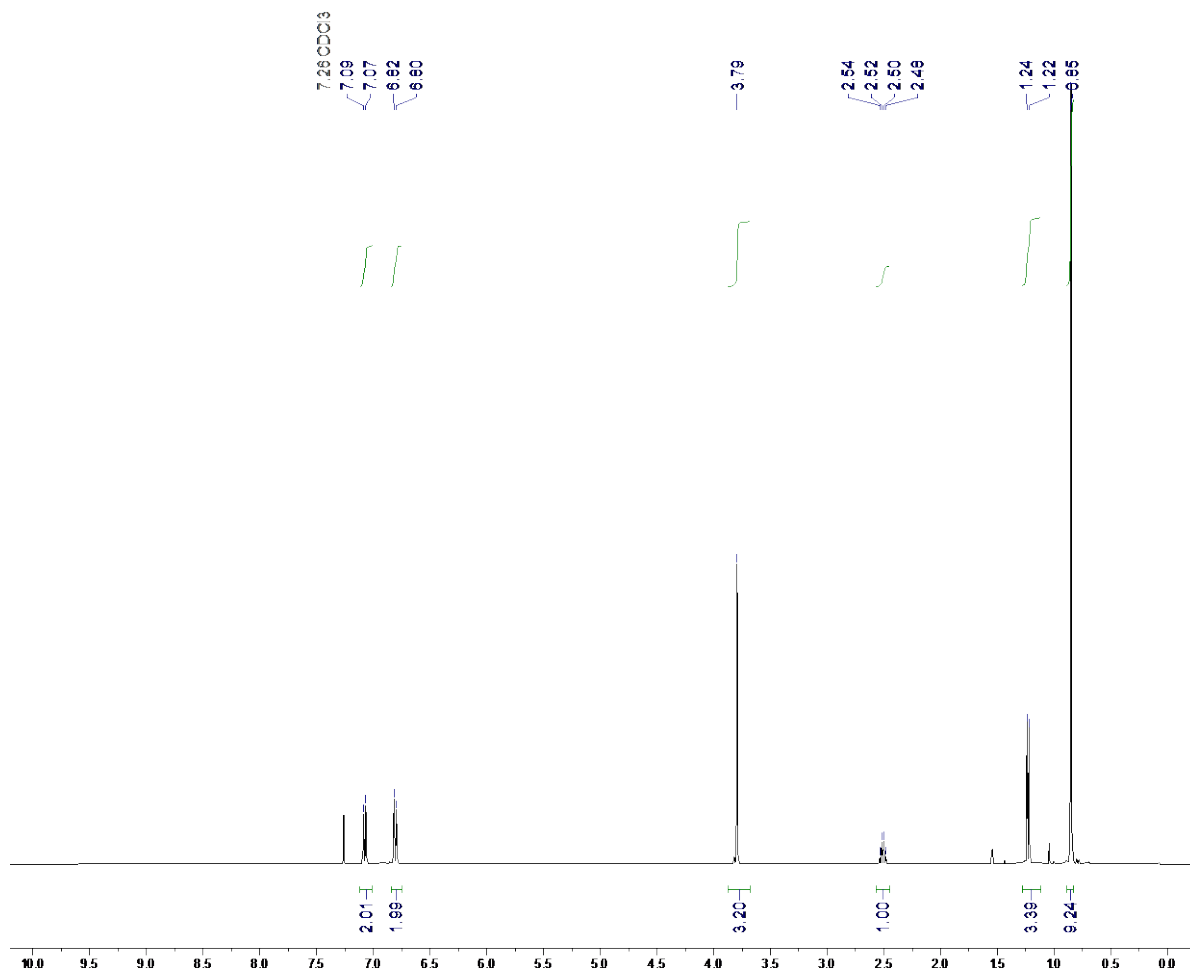

**Figure S18.** <sup>1</sup>H NMR spectrum of 1-(3,3-dimethylbutan-2-yl)-4-methoxybenzene (from S5) in CDCl<sub>3</sub>.

(a)

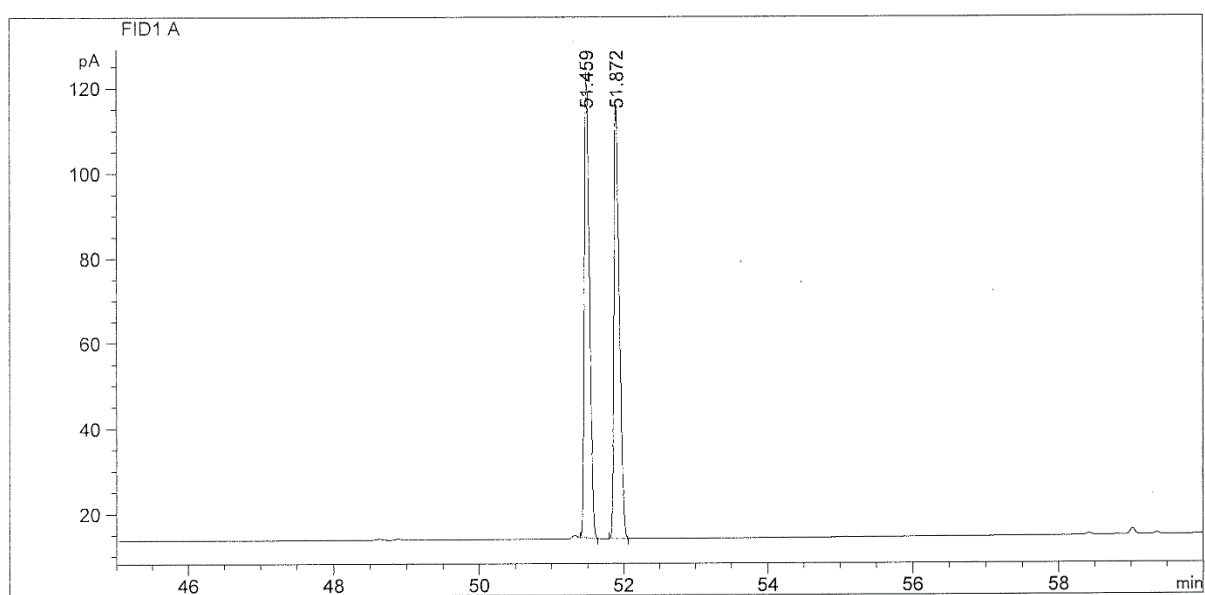

(b)

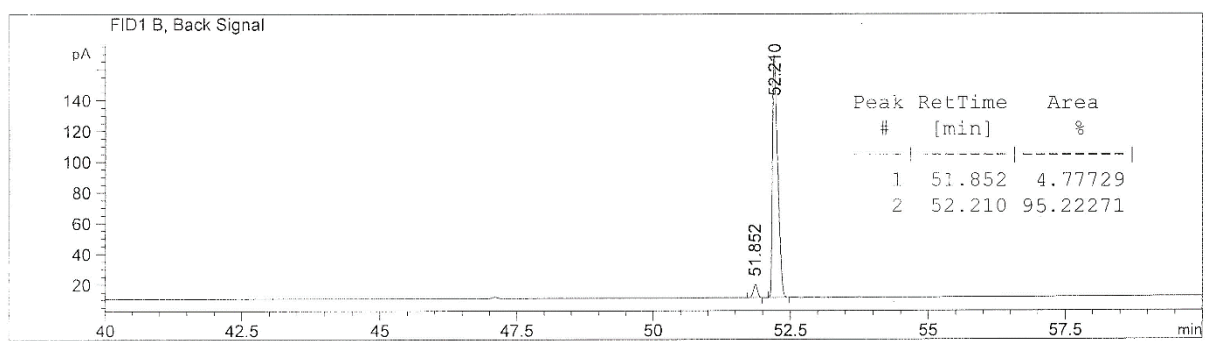

**Figure S19.** GC trace of (a) racemic and (b) enantioenriched product (90% (*R*) ee using **4c** catalytic system; Table 3, entry 1).

**1-(3,3-Dimethylbutan-2-yl)-4-(trifluoromethyl)benzene (from S6).**<sup>14</sup> Enantiomeric excess determined

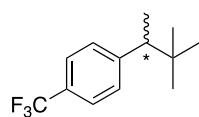

by GC using Chiradex B-DM column (100 kPa H<sub>2</sub>, 60 °C for 30 min, 3 °C/min until 175 °C). *t<sub>R</sub>* 39.5 min (*S*); *t<sub>R</sub>* 40.0 min (*R*). <sup>1</sup>H NMR (CDCl<sub>3</sub>), δ: 0.88 (s, 9H), 1.25 (d, 3H, *J*= 8.0 Hz), 2.63 (q, 1H, *J*= 7.2 Hz), 7.26 (d, 2H, *J*= 6.7 Hz), 7.51 (d, 2H, *J*=

8.0 Hz).

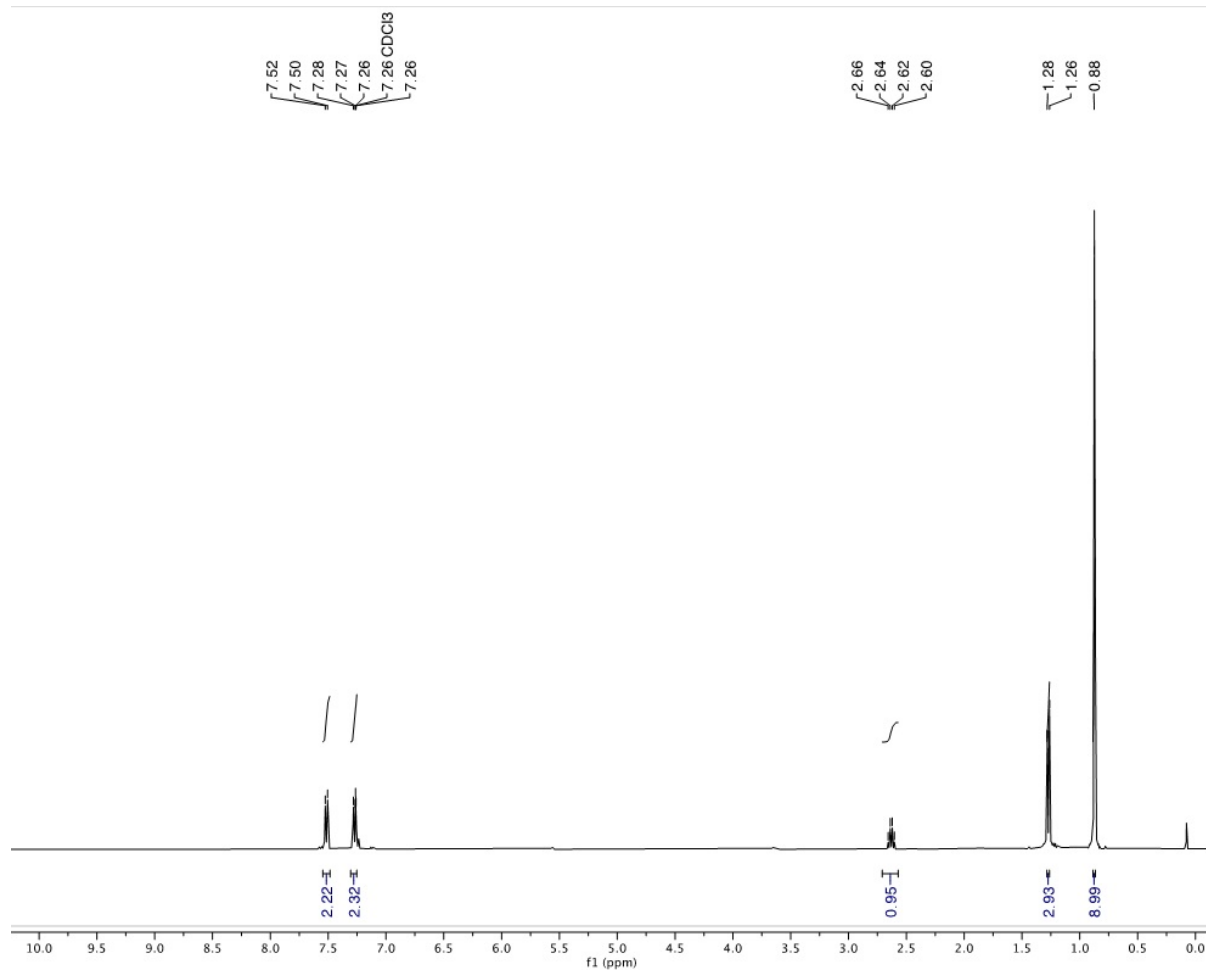

**Figure S20.** <sup>1</sup>H NMR spectrum of 1-(3,3-dimethylbutan-2-yl)-4-(trifluoromethyl)benzene (from S6) in CDCl<sub>3</sub>.

(a)

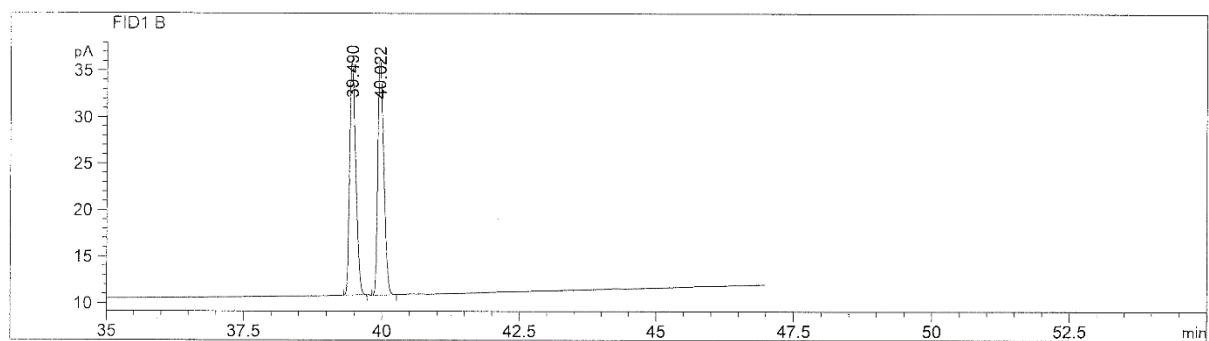

(b)

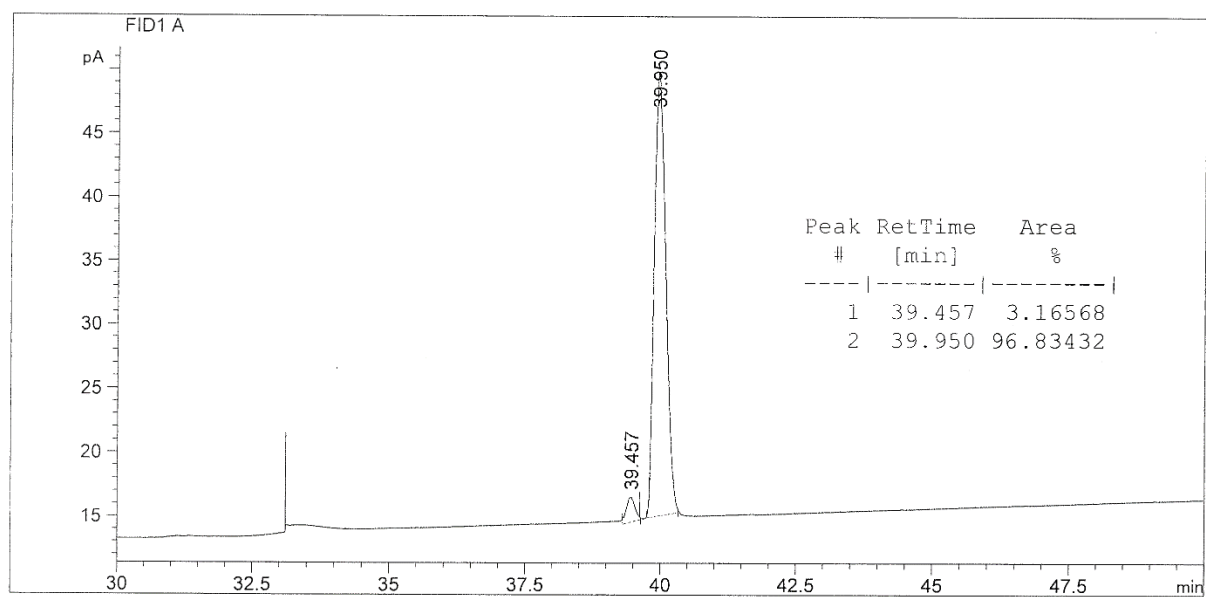

**Figure S21.** GC trace of (a) racemic and (b) enantioenriched product (94% (*R*) ee using **4c** catalytic system; Table 3, entry 2).

**1-(3,3-Dimethylbutan-2-yl)-4-methylbenzene (from S7).**<sup>14</sup> Enantiomeric excess determined by GC

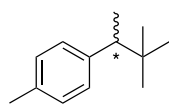

using Chiradex B-DM column (100 kPa H<sub>2</sub>, 60 °C for 30 min, 3 °C/min until 175 °C).  
t<sub>R</sub> 41.9 min (*S*); t<sub>R</sub> 42.4 min (*R*). <sup>1</sup>H NMR (CDCl<sub>3</sub>), δ: 0.86 (s, 9H), 1.24 (d, 3H, *J*= 7.2 Hz), 2.33 (s, 3H), 2.53 (q, 1H, *J*= 7.2 Hz), 7.06-7.07 (m, 4H).

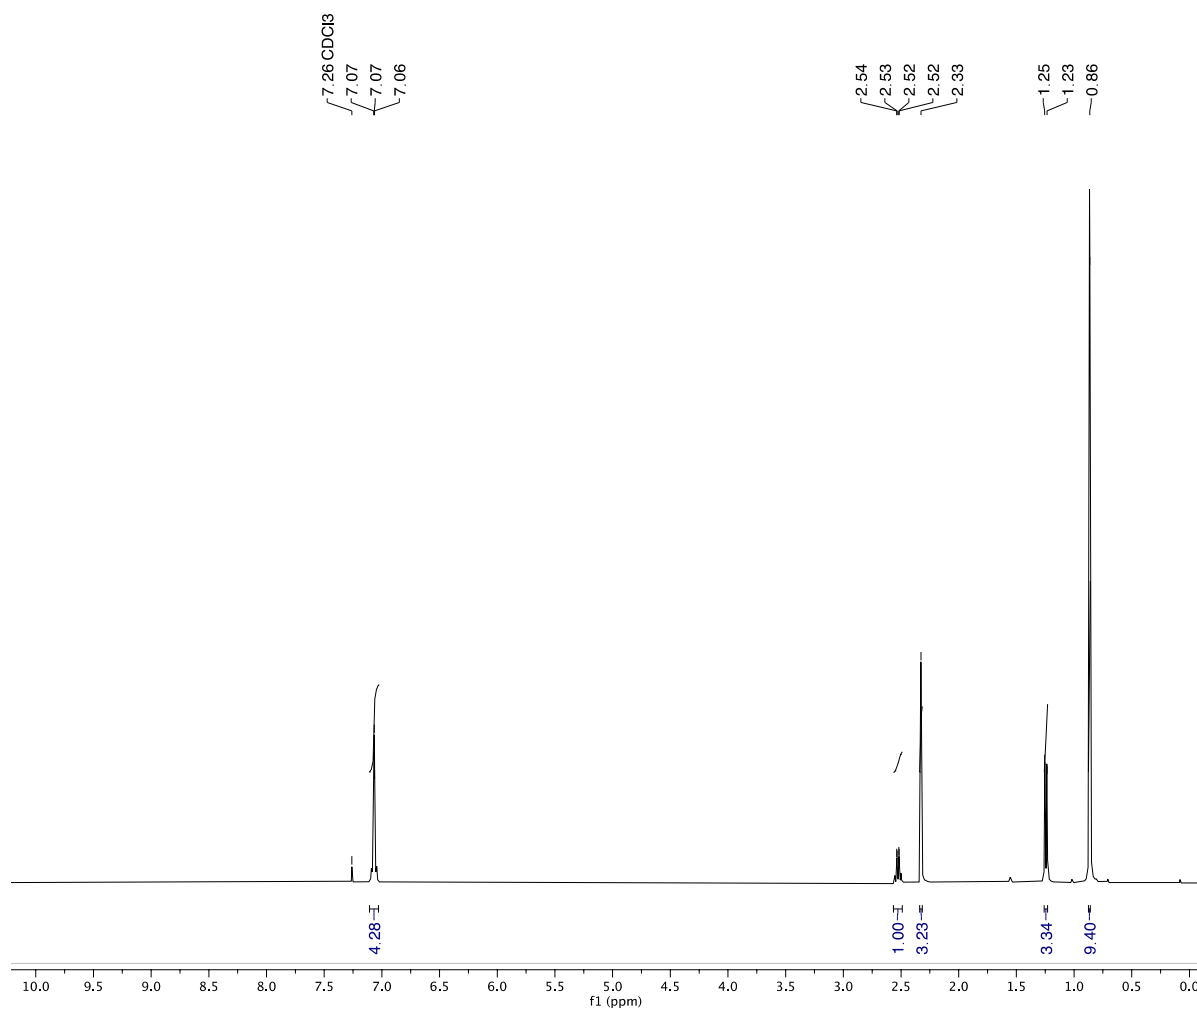

**Figure S22.** <sup>1</sup>H NMR spectrum of 1-(3,3-dimethylbutan-2-yl)-4-methylbenzene (from S7) in CDCl<sub>3</sub>.

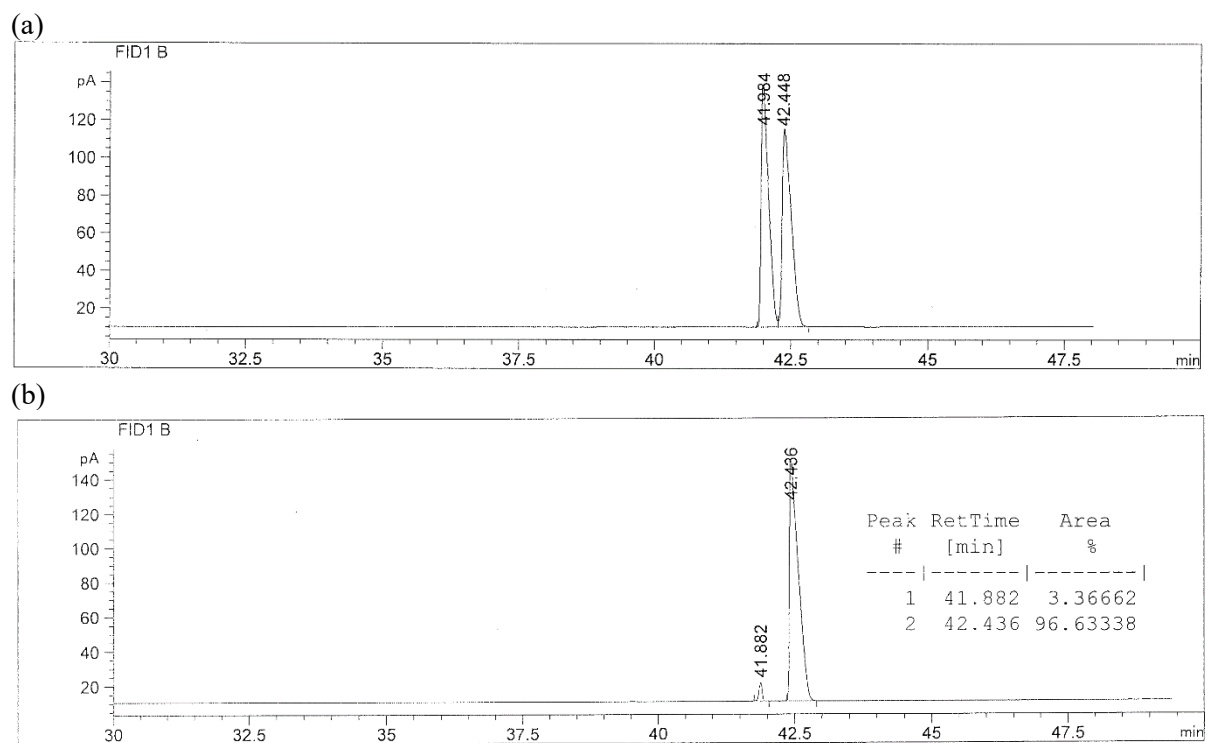

**Figure S23.** GC trace of (a) racemic and (b) enantioenriched product (92% (*R*) ee using **4c** catalytic system; Table 3, entry 3).

**1-(3,3-Dimethylbutan-2-yl)-3-methylbenzene (from S8).**<sup>14</sup> Enantiomeric excess determined by GC using Chiradex B-DM column (100 kPa H<sub>2</sub>, 60 °C for 30 min, 3 °C/min until 175 °C). t<sub>R</sub> 41.4 min (*S*); t<sub>R</sub> 42.3 min (*R*). <sup>1</sup>H NMR (CDCl<sub>3</sub>), δ: 0.86 (s, 9H), 1.24 (d, 3H, *J*= 7.2 Hz), 2.33 (s, 3H), 2.51 (q, 1H, *J*= 7.2 Hz), 6.95-7.01 (m, 3H), 7.12-7.16 (m, 1H).

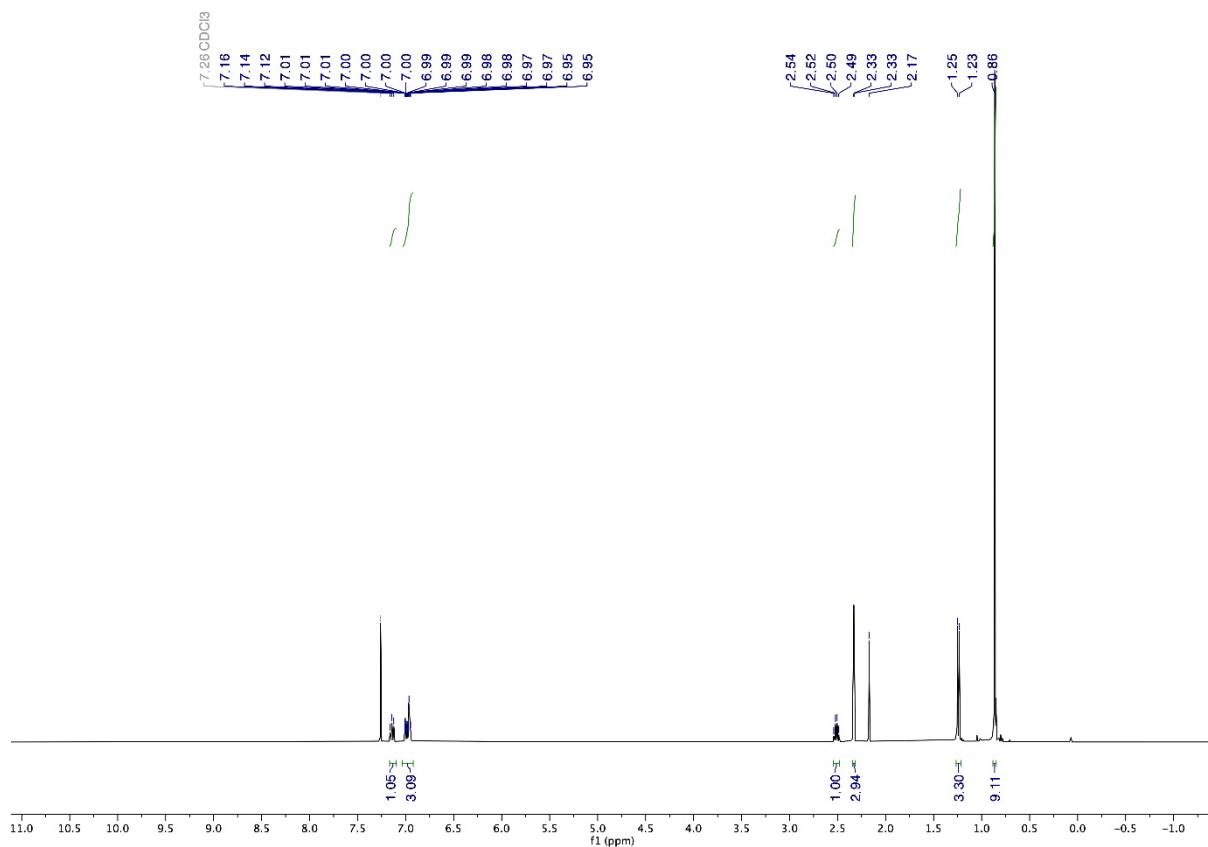

**Figure S24.** <sup>1</sup>H NMR spectrum of 1-(3,3-dimethylbutan-2-yl)-3-methylbenzene (from S8) in CDCl<sub>3</sub>.



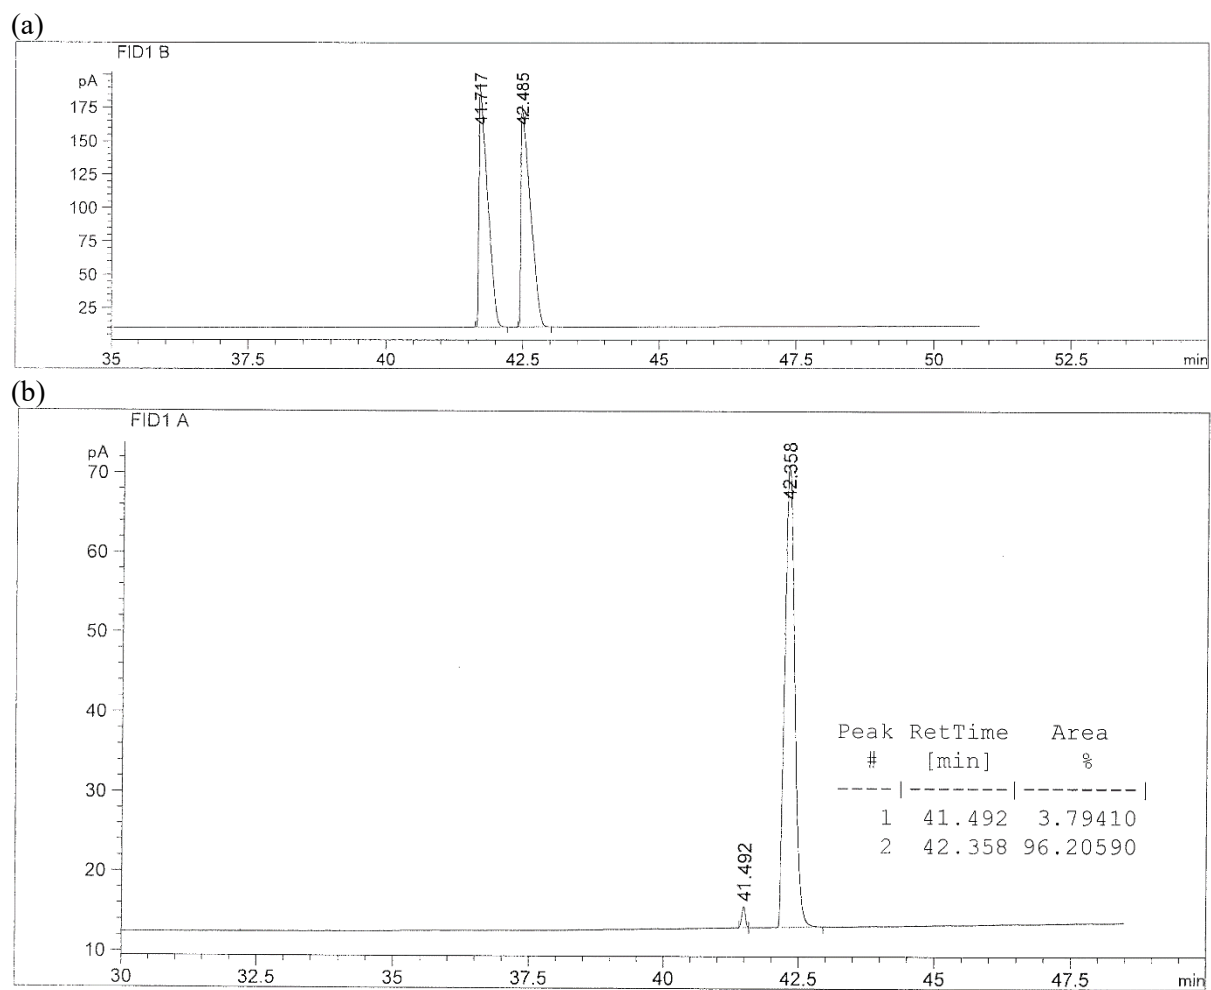

**Figure S25.** GC trace of (a) racemic and (b) enantioenriched product (92% (*R*) ee using **4c** catalytic system; Table 3, entry 4).

**2-(3,3-Dimethylbutan-2-yl)naphthalene (from S9).**<sup>14</sup> Enantiomeric excess determined by GC using

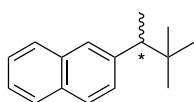

Chiradex B-DM column (100 kPa H<sub>2</sub>, 60 °C for 30 min, 3 °C/min until 175 °C). t<sub>R</sub>

63.5 min (*S*); t<sub>R</sub> 63.7 min (*R*). <sup>1</sup>H NMR (CDCl<sub>3</sub>), δ: 0.94 (s, 9H), 1.37 (d, 3H, *J*= 7.2

Hz), 2.74 (q, 1H, *J*= 7.2 Hz), 7.35-7.37 (m, 1H), 7.41-7.48 (m, 2H), 7.61-7.62 (m,

1H), 7.74-7.76 (m, 1H), 7.80-7.83 (m, 2H).

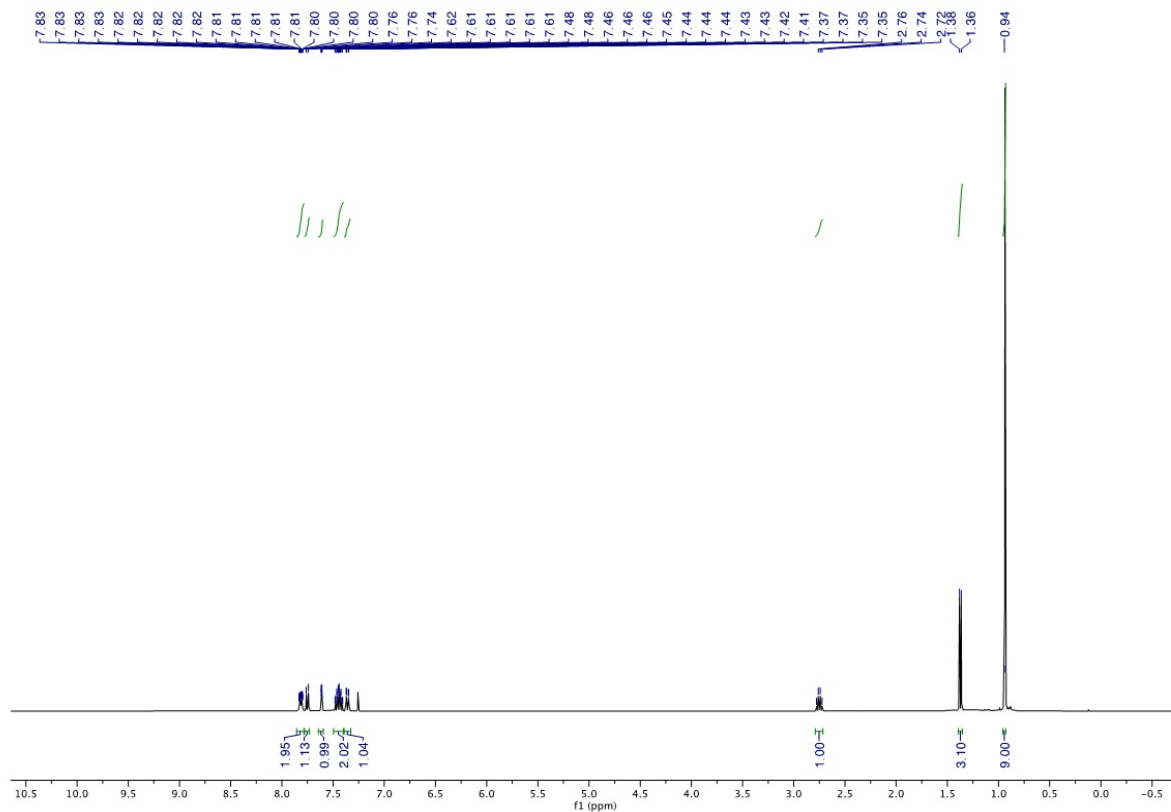

**Figure S26.** <sup>1</sup>H NMR spectrum of 2-(3,3-dimethylbutan-2-yl)naphthalene (from S9) in CDCl<sub>3</sub>.

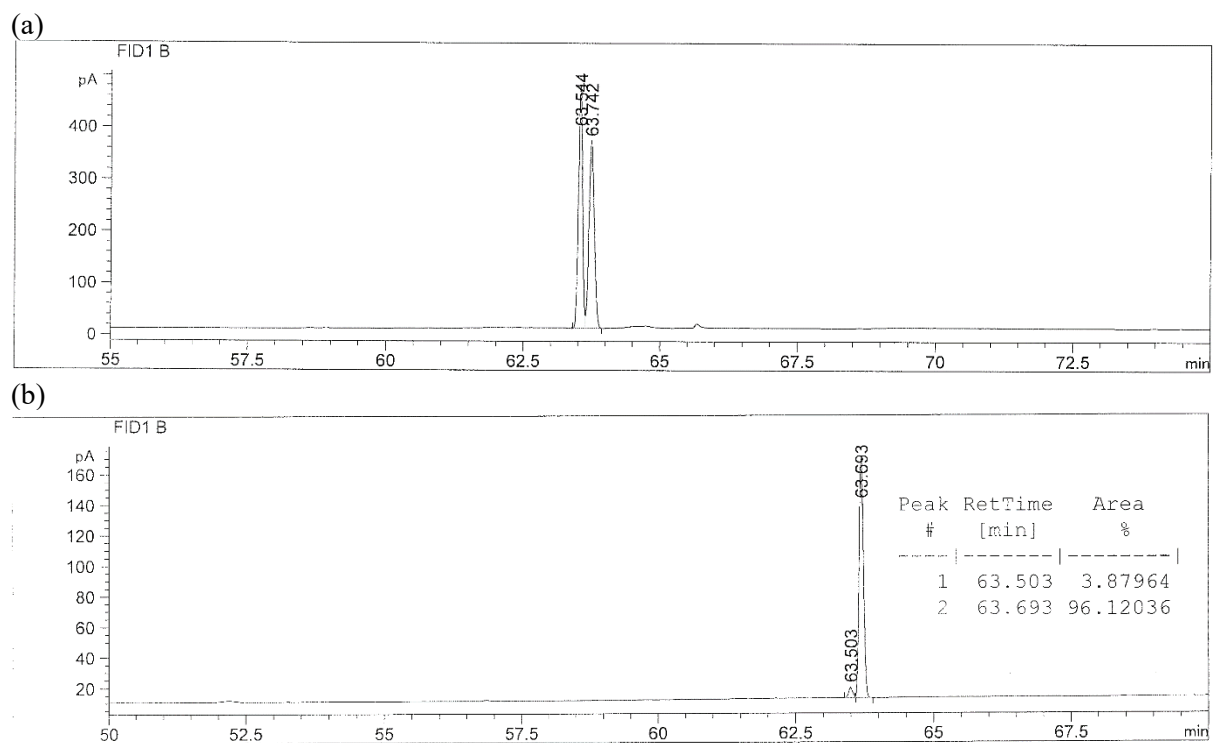

**Figure S27.** GC trace of: (a) racemic and (b) enantioenriched product (92% (*R*) ee using **4c** catalytic system; Table 3, entry 5).

**1-(3,3-Dimethylbutan-2-yl)-2-methylbenzene (from S10).**<sup>14</sup> Enantiomeric excess determined by GC

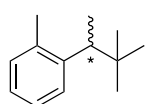

using Chiradex B-DM column (100 kPa H<sub>2</sub>, 60 °C for 30 min, 3 °C/min until 175 °C).  
t<sub>R</sub> 39.7 min (*S*); t<sub>R</sub> 40.3 min (*R*). <sup>1</sup>H NMR (CDCl<sub>3</sub>), δ: 0.91 (s, 9H), 1.21 (d, 3H, *J*= 7.2 Hz), 2.35 (s, 3H), 2.94 (q, 1H, *J*= 7.2 Hz), 7.07-7.22 (m, 4H).

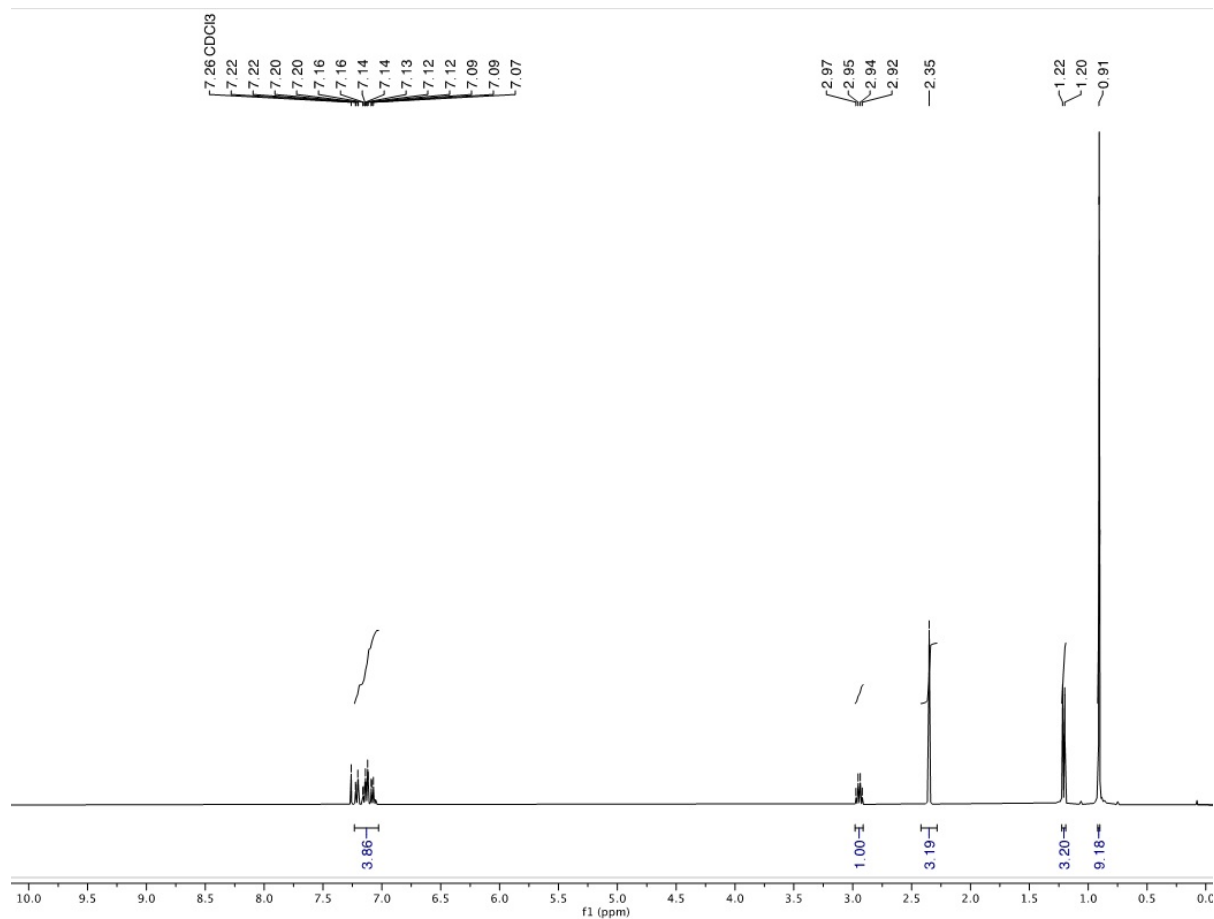

**Figure S28.** <sup>1</sup>H NMR spectrum of 1-(3,3-dimethylbutan-2-yl)-2-methylbenzene (from S10) in CDCl<sub>3</sub>.

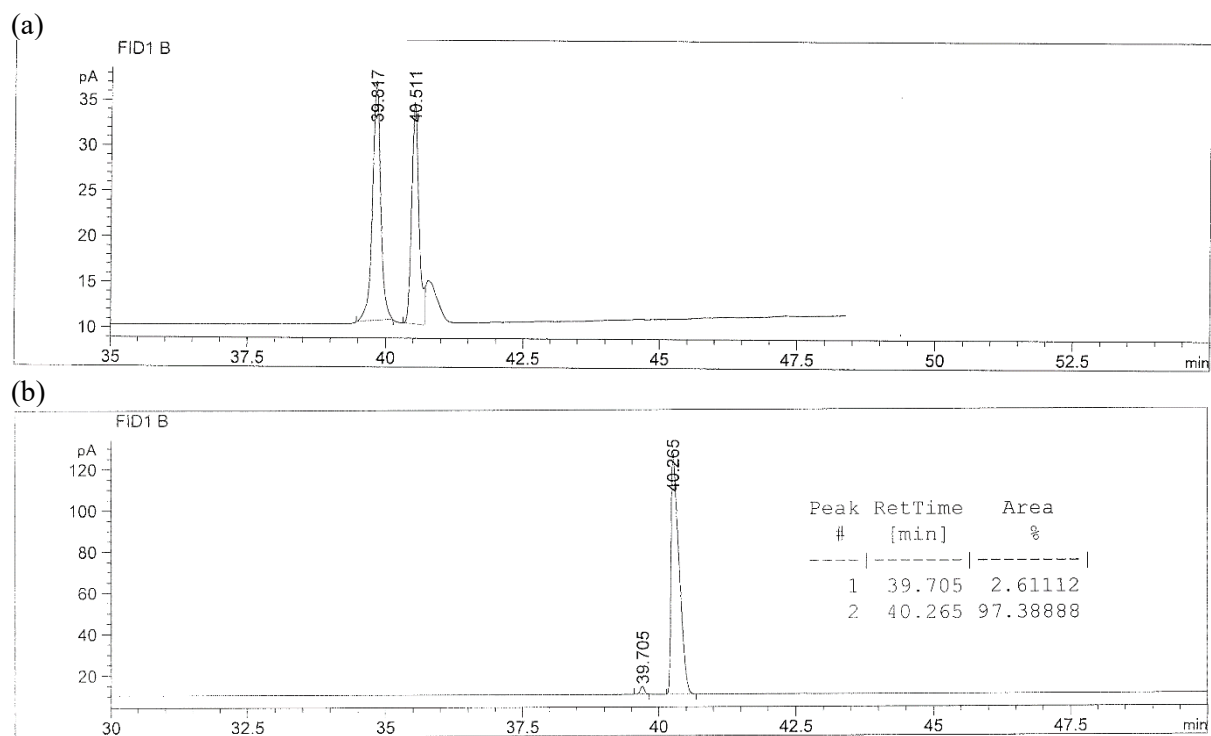

**Figure S29.** GC trace of (a) racemic and (b) enantioenriched product (94% (*R*) ee using **4c** catalytic system; Table 3, entry 6).

**1-(3,3-Dimethylbutan-2-yl)naphthalene (from S11).**<sup>14</sup> Enantiomeric excess determined by GC using

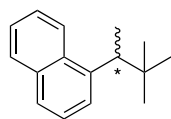

Chiradex B-DM column (100 kPa H<sub>2</sub>, 60 °C for 30 min, 3 °C/min until 175 °C). t<sub>R</sub>

62.3 min (*S*); t<sub>R</sub> 62.7 min (*R*). <sup>1</sup>H NMR (CDCl<sub>3</sub>), δ: 0.99 (s, 9H), 1.43 (d, 3H, *J*= 7.1

Hz), 3.70 (q, 1H, *J*= 7.1 Hz), 7.46-7.54 (m, 4H), 7.75-7.77 (m, 1H), 7.88-7.90 (m, 1H),

8.29-8.32 (m, 1H).

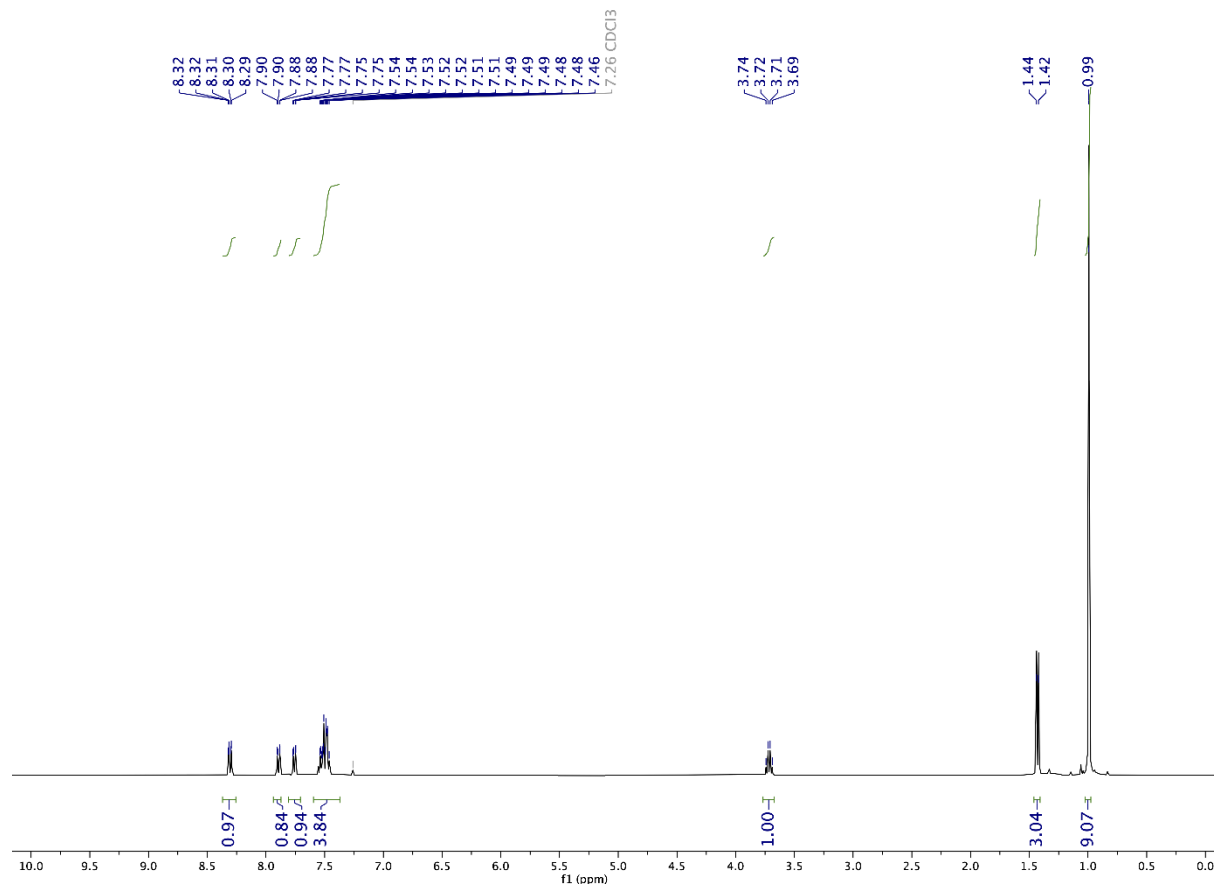

**Figure S30.** <sup>1</sup>H NMR spectrum of 1-(3,3-dimethylbutan-2-yl)naphthalene (from S11) in CDCl<sub>3</sub>.

(a)

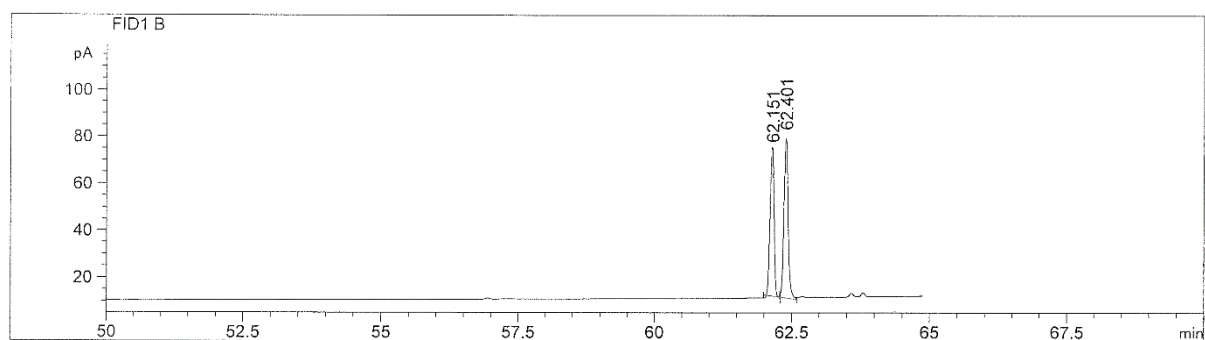

(b)

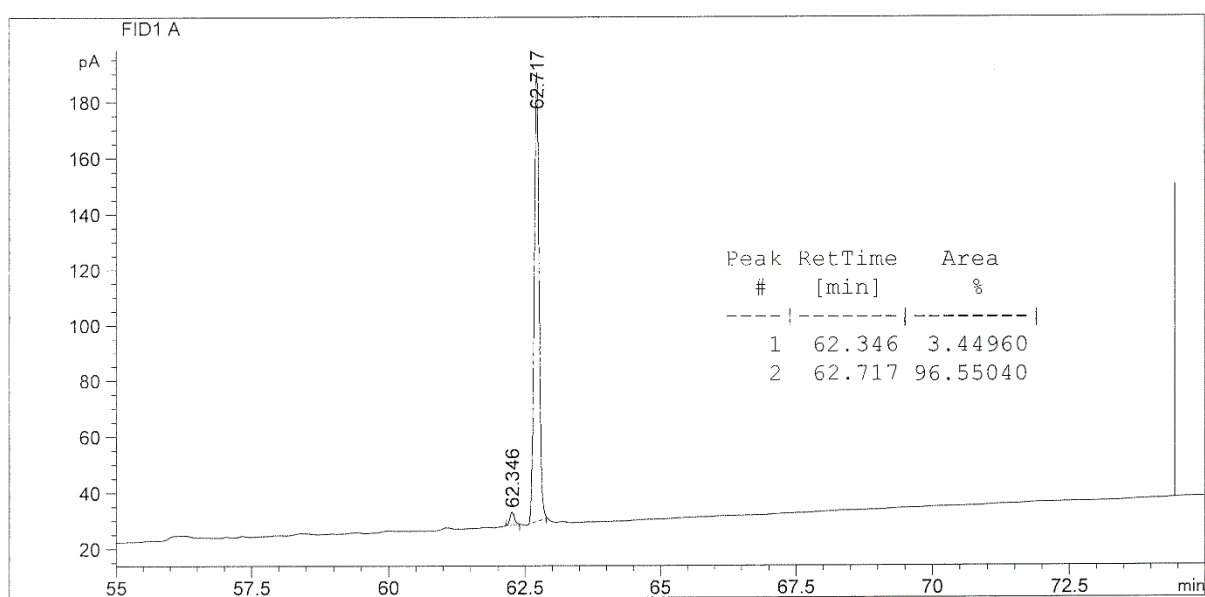

**Figure S31.** GC trace of: (a) racemic and (b) enantioenriched product (93% (*R*) ee using **4c** catalytic system; Table 3, entry 7).

**1-Methoxy-4-(1-phenylpropan-2-yl)benzene (from S13).**<sup>39</sup> Enantiomeric excess determined by HPLC using Chiracel OJ-H column (hexane/2-propanol=95/5, 0.5 mL/min, 210 nm).  $t_R$  16.2 min (*R*);  $t_R$  19.4 min (*S*).  $^1\text{H NMR}$  ( $\text{CDCl}_3$ ),  $\delta$ : 1.21 (d, 3H,  $J= 6.8$  Hz), 2.71-2.76 (m, 1H), 2.87-2.97 (m, 2H), 3.79 (s, 3H), 6.81-6.83 (d, 2H,  $J= 8.7$  Hz), 7.05-7.26 (m, 7 H).

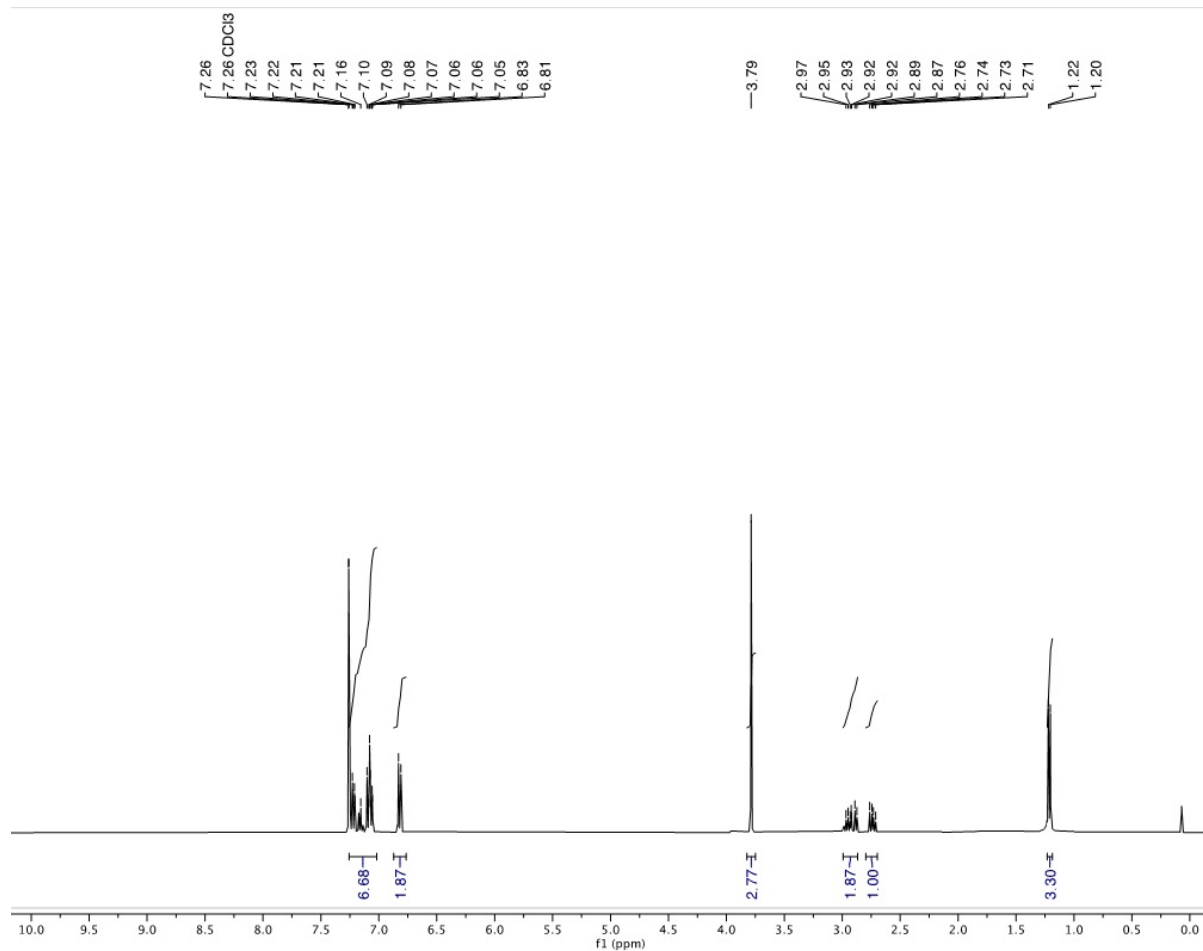

**Figure S32.**  $^1\text{H NMR}$  spectrum of 1-methoxy-4-(1-phenylpropan-2-yl)benzene (from S13) in  $\text{CDCl}_3$ .



(a)

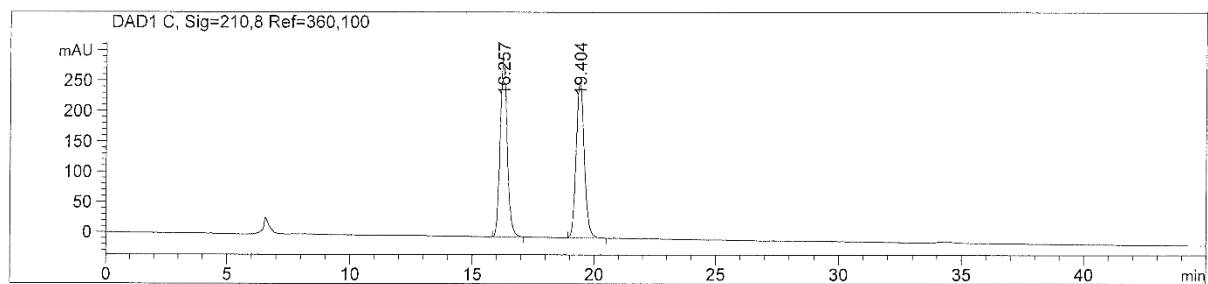

(b)

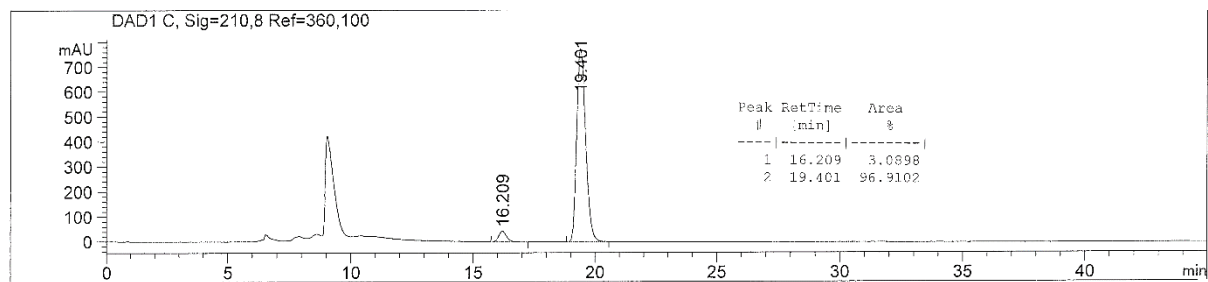

**Figure S33.** HPLC trace of enantioenriched product (94% (*S*) ee using **4c** catalytic system; Table 3, entry 10).

**Propane-1,2-diylidibenzene (from S14).**<sup>40</sup> Enantiomeric excess determined by HPLC using Chiralcel

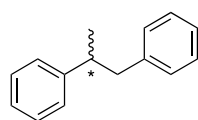

OJ-H column (hexane/2-propanol=99/1, 0.5 mL/min, 220 nm).  $t_R$  13.8 min (*R*);  $t_R$  21.1 min (*S*). <sup>1</sup>H NMR (CDCl<sub>3</sub>),  $\delta$ : 1.27 (d, 3H,  $J$ = 6.8 Hz), 2.77-2.82 (m, 1H), 2.96-3.06 (m, 2H), 7.10-7.12 (m, 2H), 7.19-7.33 (m, 8H).

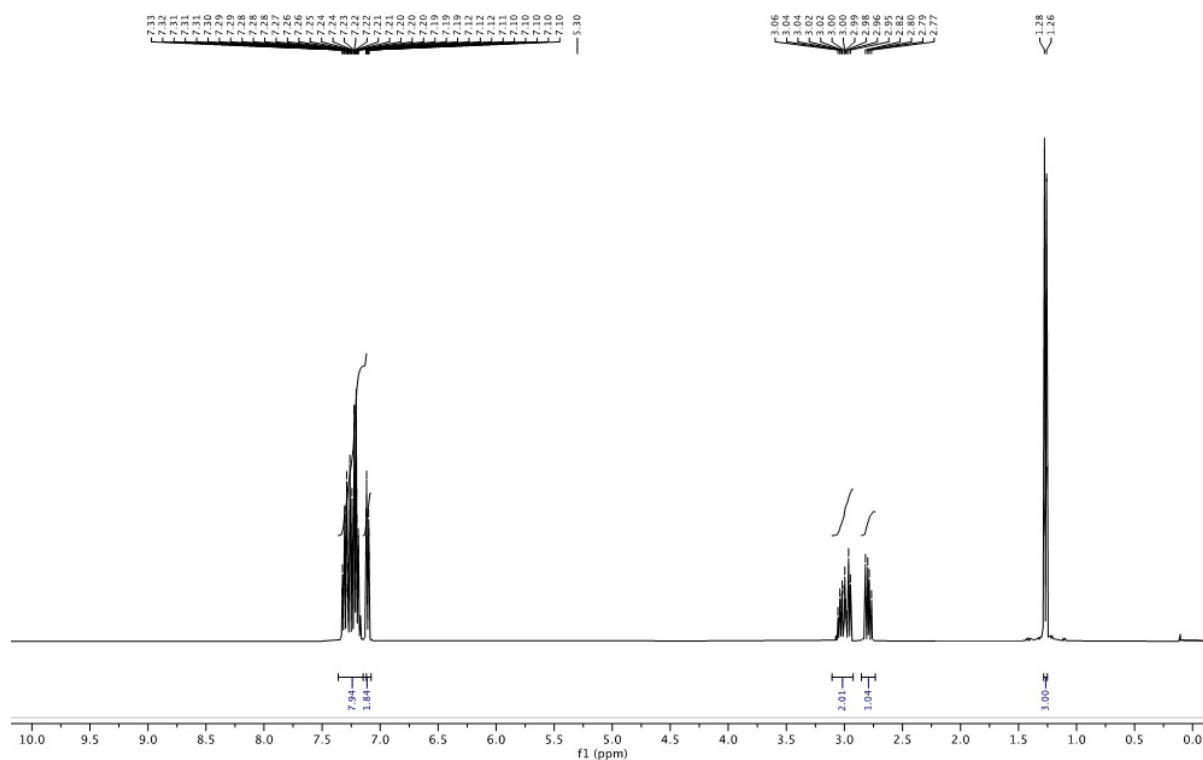

**Figure S34.** <sup>1</sup>H NMR spectrum of propane-1,2-diylidibenzene (from S14) in CDCl<sub>3</sub>.

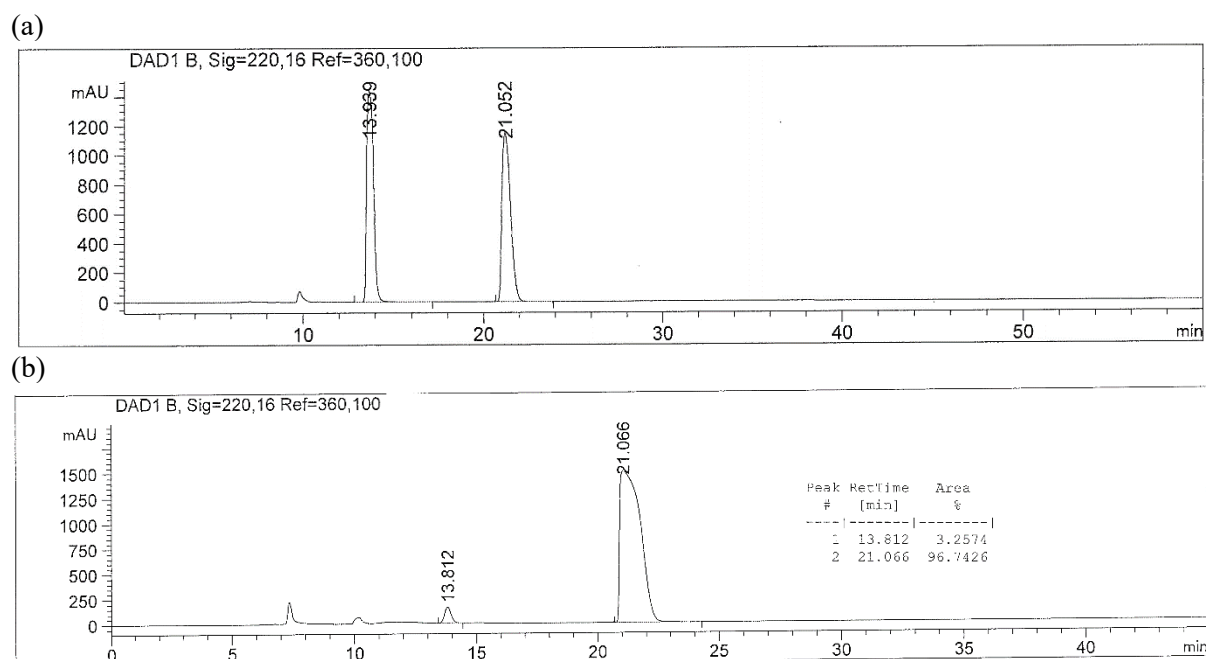

**Figure S35.** HPLC trace of: (a) racemic and (b) enantioenriched product (93% (*S*) ee using **4c** catalytic system; Table 3, entry 11).

**6-Methoxy-1-naphthyl-1,2,3,4-tetrahydronaphthalene (from S16).**<sup>40</sup> Enantiomeric excess determined

by GC using Chiradex B-DM column (100 kPa H<sub>2</sub>, 60 °C for 30 min, 3 °C/min until 175 °C).  $t_R$  59.7 min (*R*);  $t_R$  59.9 min (*S*). <sup>1</sup>H NMR (CDCl<sub>3</sub>),  $\delta$ : 1.27 (d, 3H,  $J=7.0$  Hz), 1.49-1.56 (m, 1H), 1.70-1.74 (m, 1H), 1.84-1.93 (m, 2H), 2.72-2.77 (m, 2H), 2.85-2.86 (m, 1H), 3.78 (s, 3H), 6.61 (d, 1H,  $J=2.8$  Hz), 6.72 (dd, 1H,  $J=8.5$ ,  $J=2.8$  Hz), 7.12 (d, 1H,  $J=8.5$  Hz).

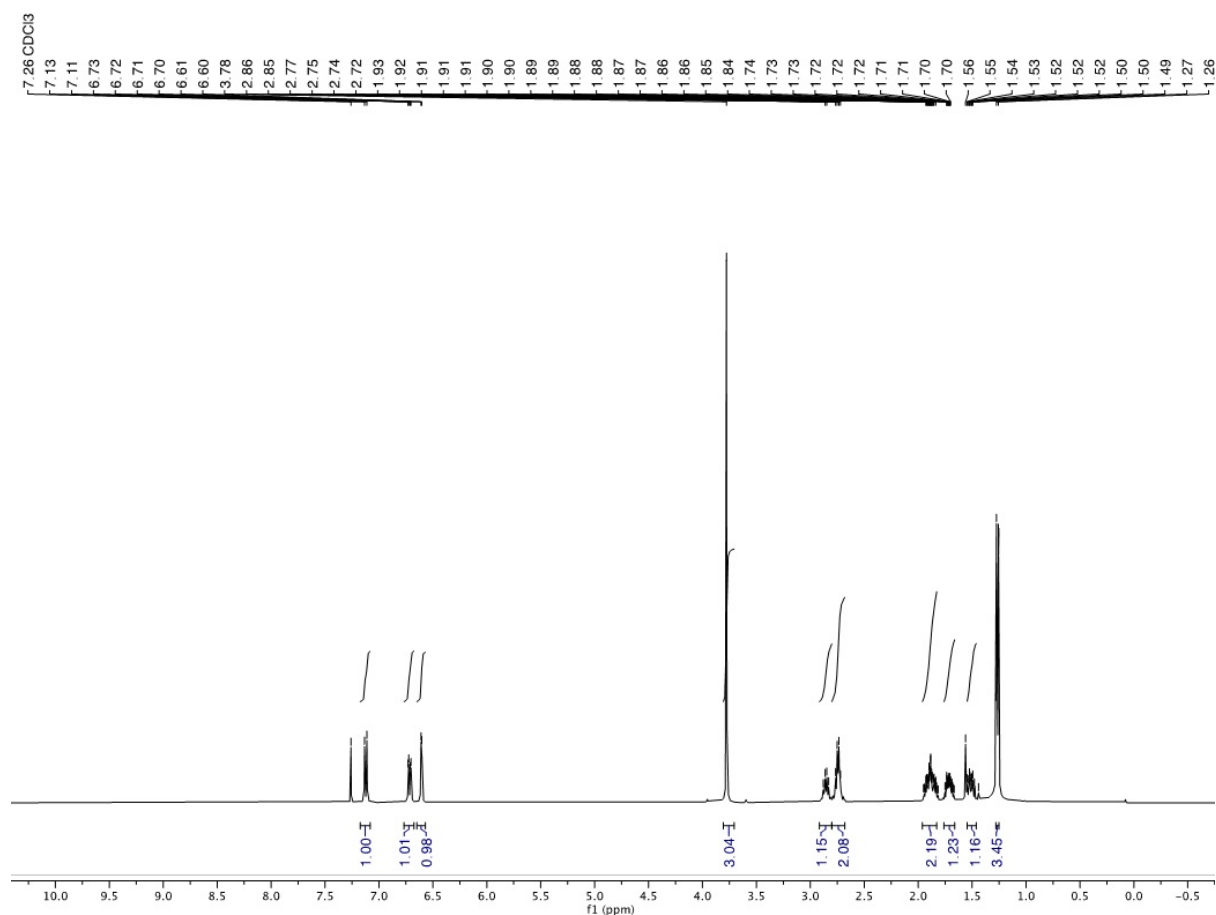

**Figure S36.** <sup>1</sup>H NMR spectrum of 6-methoxy-1-naphthyl-1,2,3,4-tetrahydronaphthalene (from S16) in CDCl<sub>3</sub>.

(a)

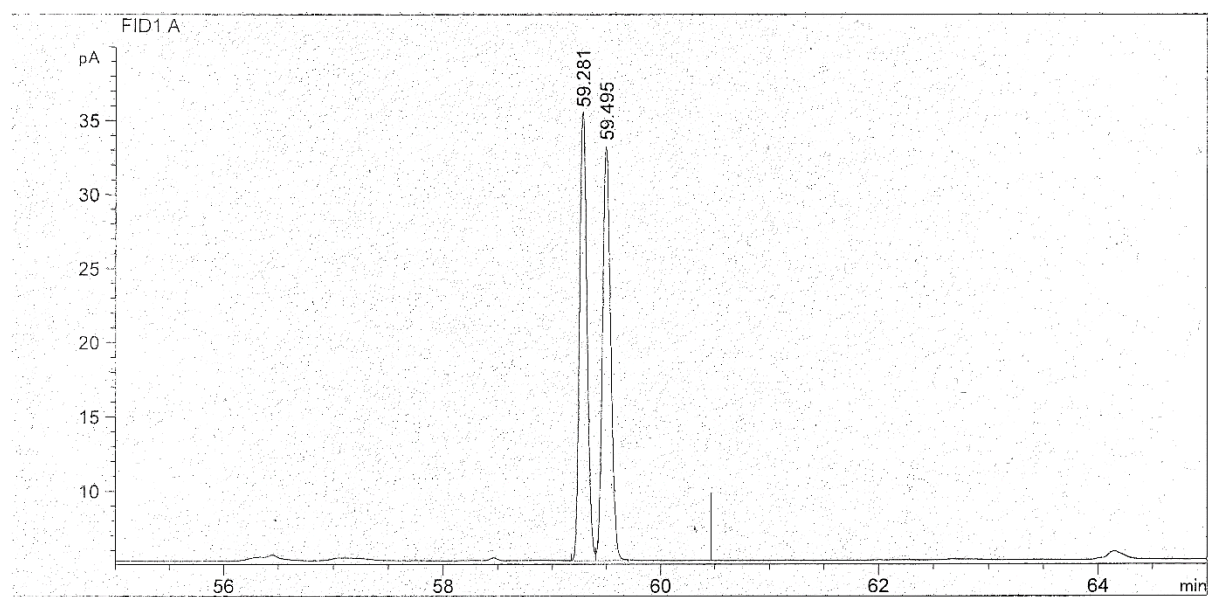

(b)

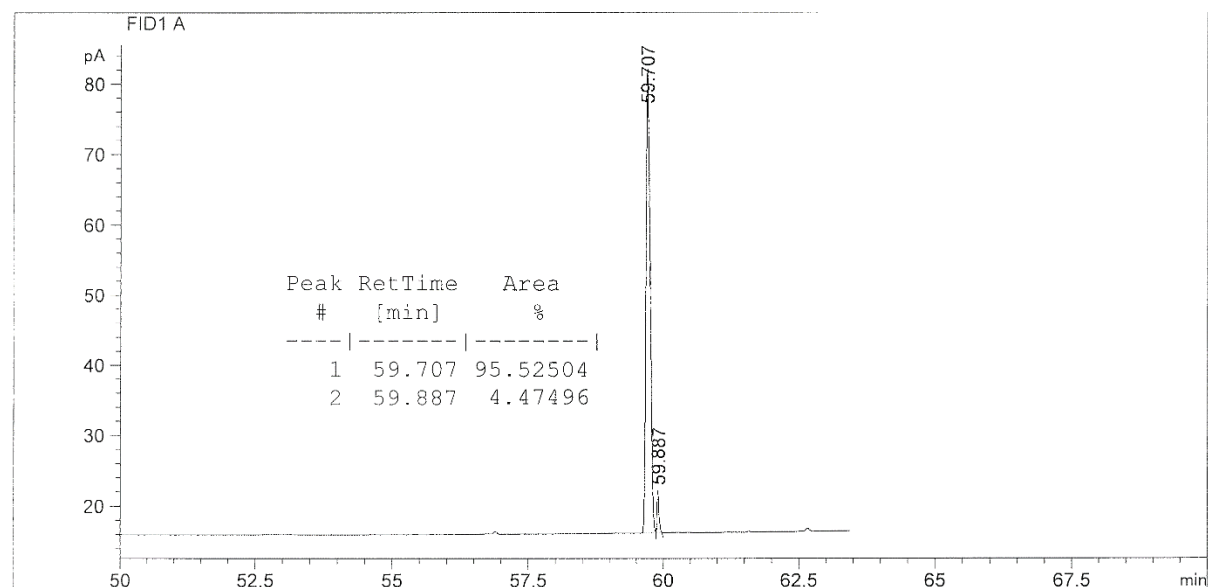

**Figure S37.** GC trace of: (a) racemic and (b) enantioenriched product (91% (*R*) ee using **4c** catalytic system; Table 3, entry 13).

**1-Isopropyl-6-methoxy-1,2,3,4-tetrahydronaphthalene (from S17).**<sup>41</sup> Enantiomeric excess determined by GC using Chiradex B-DM column (100 kPa H<sub>2</sub>, 60 °C for 30 min, 3 °C/min until 175 °C). t<sub>R</sub> 65.0 min (*R*); t<sub>R</sub> 65.2 min (*S*). <sup>1</sup>H NMR (CDCl<sub>3</sub>), δ: 0.74 (d, 3H, *J*= 6.9 Hz), 1.00 (d, 3H, *J*= 6.9 Hz), 1.57-1.62 (m, 2H), 1.77-1.79 (m, 1H), 1.90-1.91 (m, 1H), 2.17-2.22 (m, 1H), 2.64-2.75 (m, 3H), 3.78 (s, 3H), 6.60 (d, 1H, *J*= 2.7 Hz), 6.70 (dd, 1H, *J*= 8.6 Hz, *J*= 2.8 Hz), 7.12 (dd, 1H, *J*= 8.5 Hz, *J*= 0.8 Hz).

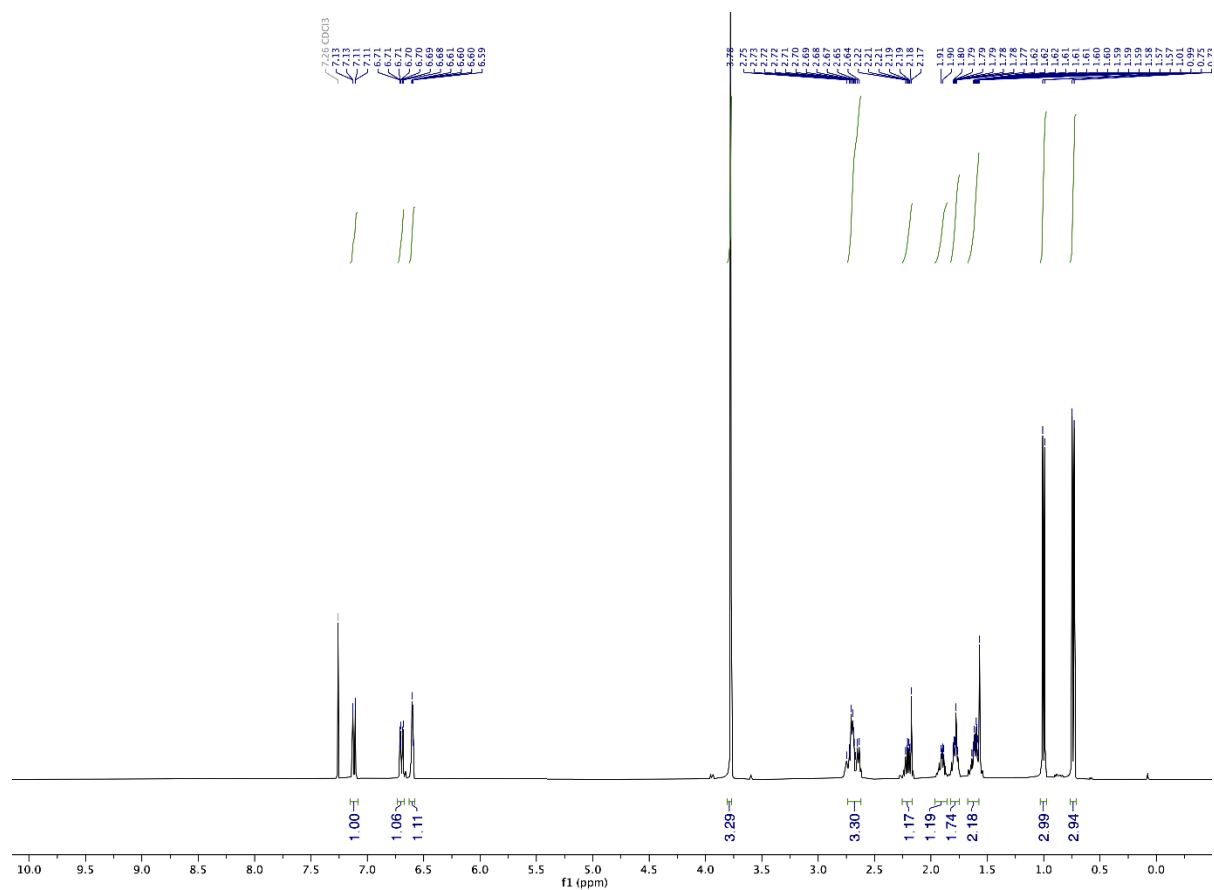

**Figure S38.** <sup>1</sup>H NMR spectrum of 1-isopropyl-6-methoxy-1,2,3,4-tetrahydronaphthalene (from S17) in CDCl<sub>3</sub>.

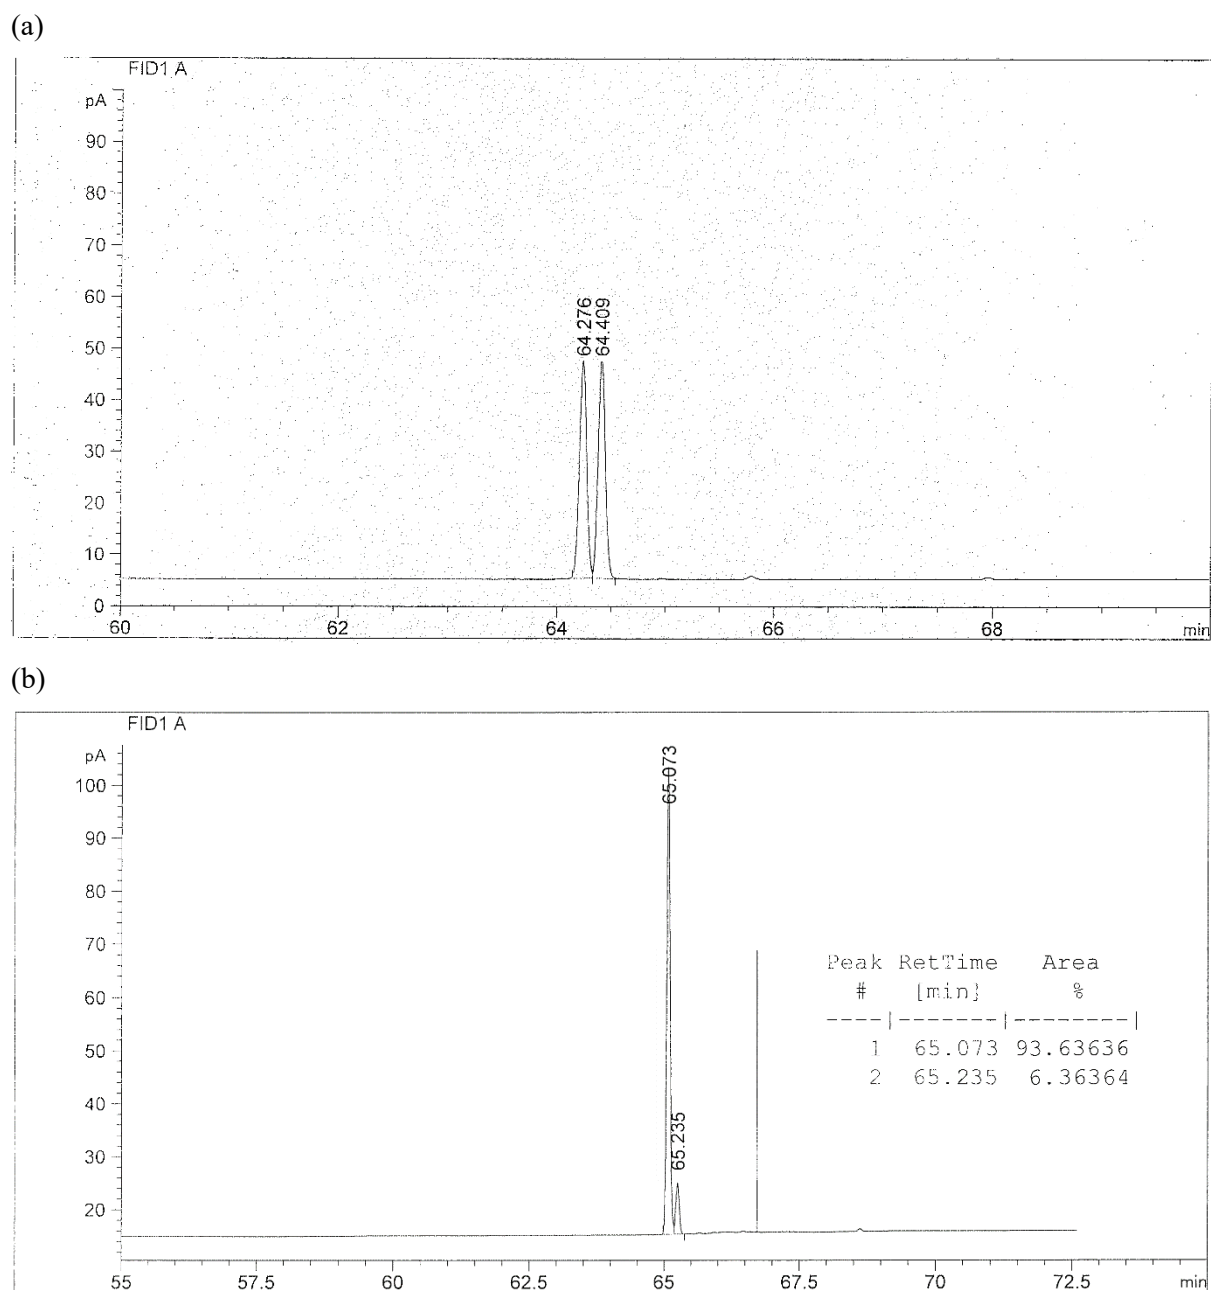

**Figure S39.** GC trace of: (a) racemic and (b) enantioenriched product (87% (*R*) ee using **4c** catalytic system; Table 3, entry 14).

(1-(3,5-Dimethylphenyl)ethane-1,2-diyl)dibenzene (from S18).<sup>20</sup> Enantiomeric excess determined by

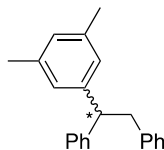

HPLC using Chiracel OJ-H column (hexane/2-propanol=98/2, 0.4 mL/min, 220 nm).

$t_R$  18.7 min (-);  $t_R$  21.9 min (+).  $^1H$  NMR ( $CDCl_3$ ),  $\delta$ : 2.26 (s, 6H), 3.32-3.35 (m, 2H),

4.13-4.17 (m, 1H), 6.81 (s, 1H), 6.86 (s, 2H), 6.99-7.02 (m, 2H), 7.12-7.26 (m, 8H).

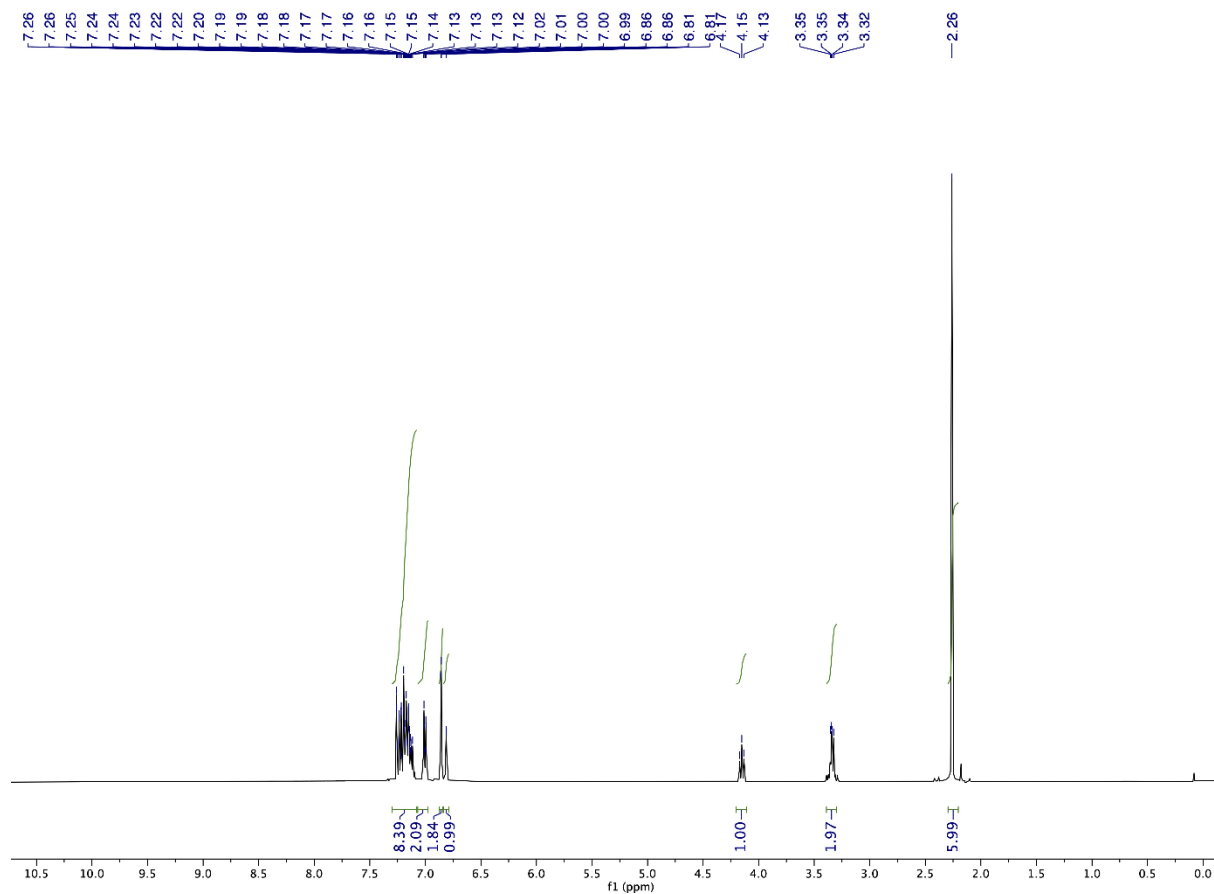

**Figure S40.**  $^1H$  NMR spectrum of (1-(3,5-dimethylphenyl)ethane-1,2-diyl)dibenzene (from S18) in  $CDCl_3$ .

(a)

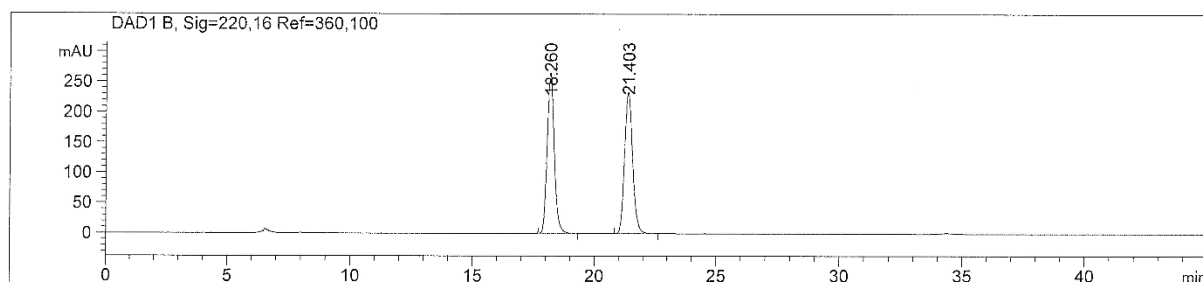

(b)

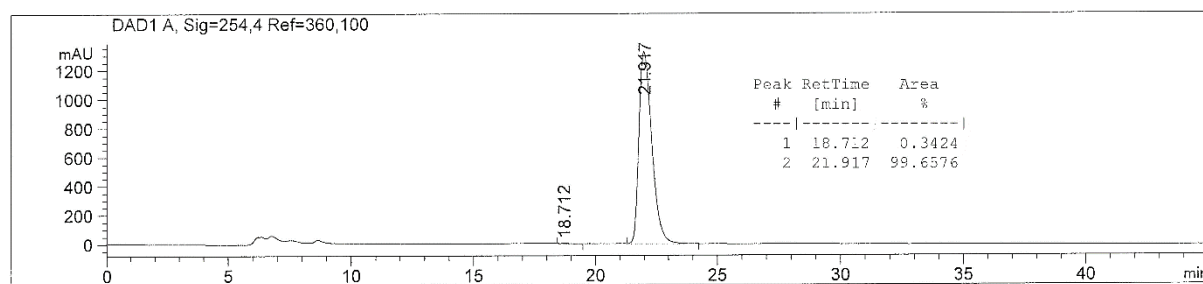

**Figure S41.** HPLC trace of enantioenriched product (99% (*R*) ee using **4c** catalytic system; Table 3, entry 15).



**(1-(4-Methoxyphenyl)ethane-1,2-diyl)dibenzene (from S19).**<sup>20</sup> Enantiomeric excess determined by

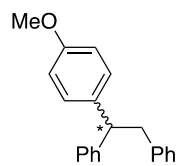

HPLC using Chiracel OJ-H column (hexane/2-propanol=80/20, 0.5 mL/min, 254 nm).  $t_R$  17.2 min (-);  $t_R$  19.3 min (+). <sup>1</sup>H NMR (CDCl<sub>3</sub>),  $\delta$ : 3.32 (s, 3H), 3.76 (s, 3H), 4.18 (t, 1H,  $J=7.8$  Hz), 6.78 (d, 2H,  $J=8.7$  Hz), 6.99-7.01 (m, 2H), 7.10-7.26 (m, 10H).

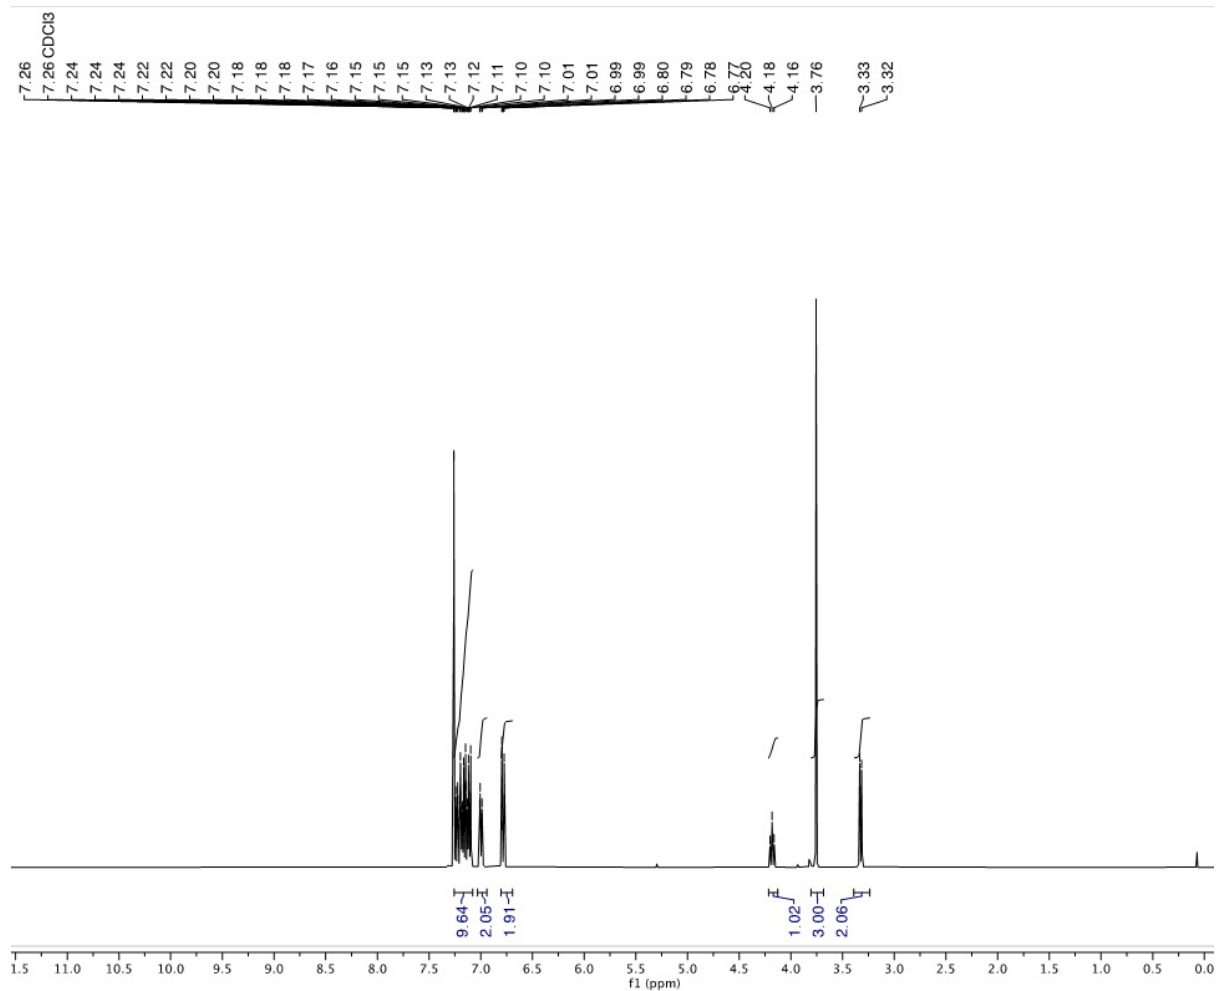

**Figure S42.** <sup>1</sup>H NMR spectrum of (1-(4-methoxyphenyl)ethane-1,2-diyl)dibenzene (from S19) in CDCl<sub>3</sub>.

(a)

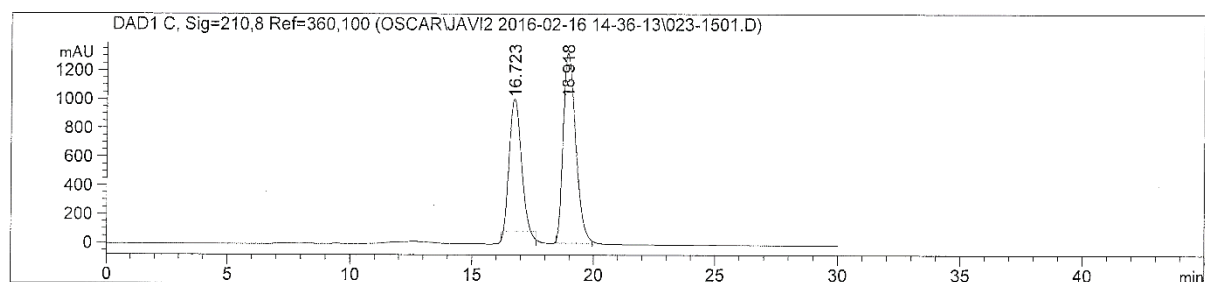

(b)

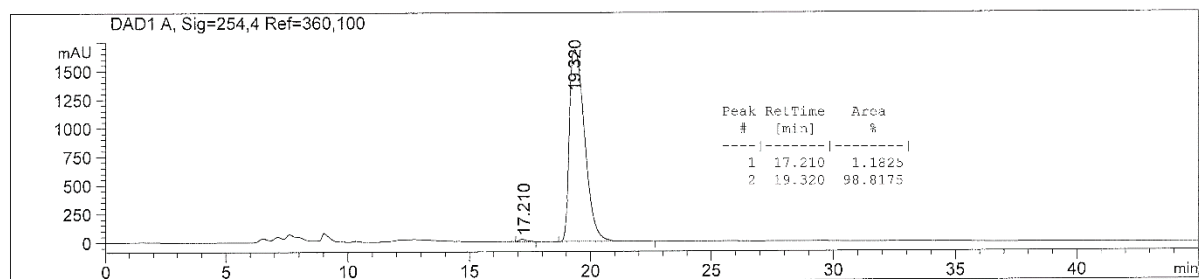

**Figure S43.** HPLC trace of: (a) racemic and (b) enantioenriched product (98% (*R*) ee using **4c** catalytic system; Table 3, entry 16).

**2,3-Dimethylpentane (from S20).**<sup>42</sup> Enantiomeric excess determined by GC using Chiradex B-DM column (50 kPa H<sub>2</sub>, 30 °C – 0.1 °C/min until 40 °C). t<sub>R</sub> 7.7 min (*S*); t<sub>R</sub> 7.9 min (*R*). <sup>1</sup>H NMR (CD<sub>2</sub>Cl<sub>2</sub>), δ: 0.78 (d, 3H, *J*= 6.6 Hz), 0.79 (d, 3H, *J*= 6.6 Hz), 0.83-0.86 (m, 6H), 1.05-1.20 (m, 2H), 1.32-1.38 (m, 1H), 1.51-1.58 (m, 1H).

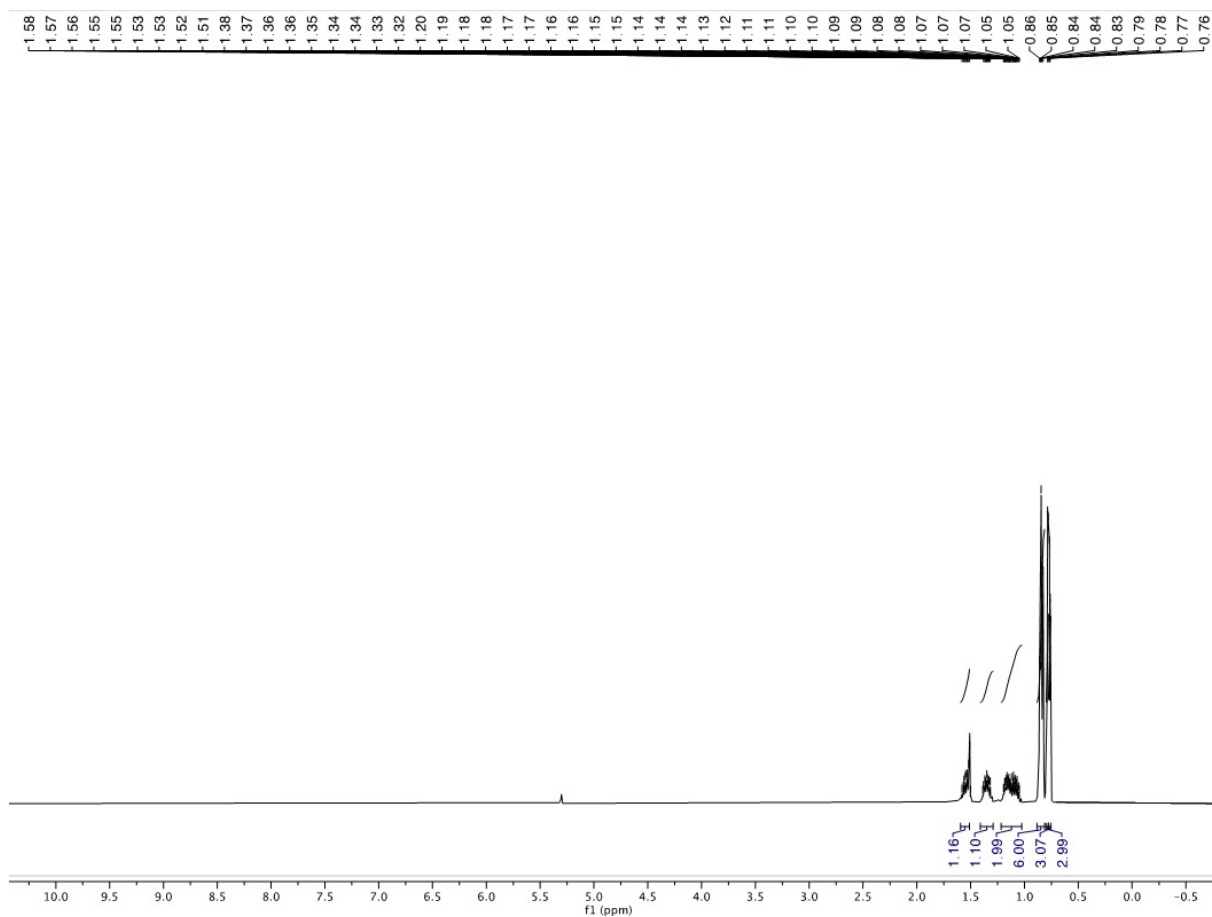

**Figure S44.** <sup>1</sup>H NMR spectrum of 2,3-dimethylpentane (from S20) in CD<sub>2</sub>Cl<sub>2</sub>.

(a)

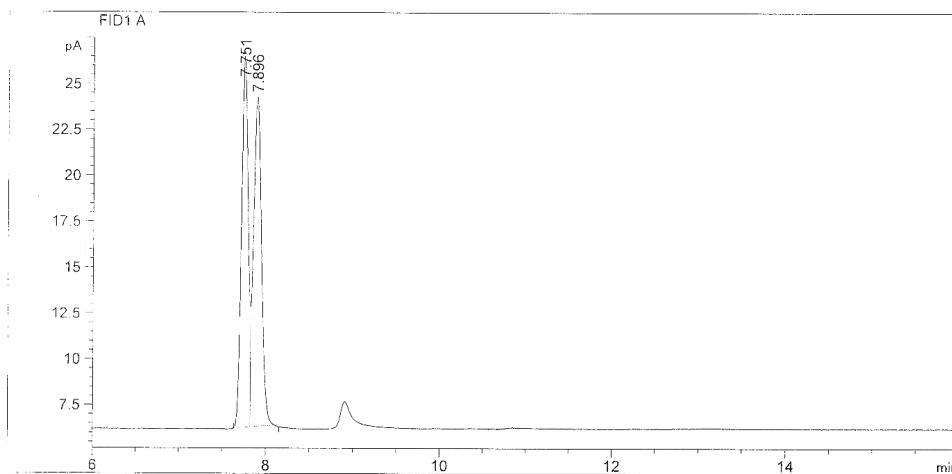

(b)

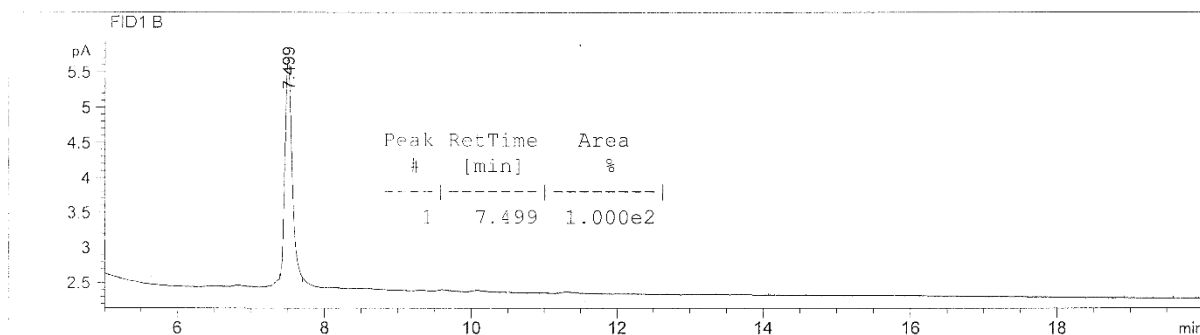

**Figure S45.** GC traces of (a) racemic and (b) enantioenriched product (>98% (*S*) ee using **4c** catalytic system; Table 3, entry 17).

*sec*-Butylcyclohexane (from S21).<sup>43</sup> Enantiomeric excess determined by GC using Chiradex B-DM column (50 kPa H<sub>2</sub>, 50 °C for 60 min, 3 °C/min until 175 °C). t<sub>R</sub> 67.7 min (*S*); t<sub>R</sub> 68.1 min (*R*). <sup>1</sup>H NMR (CD<sub>2</sub>Cl<sub>2</sub>), δ: 0.78-1.72 (complex multiplets).

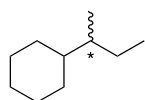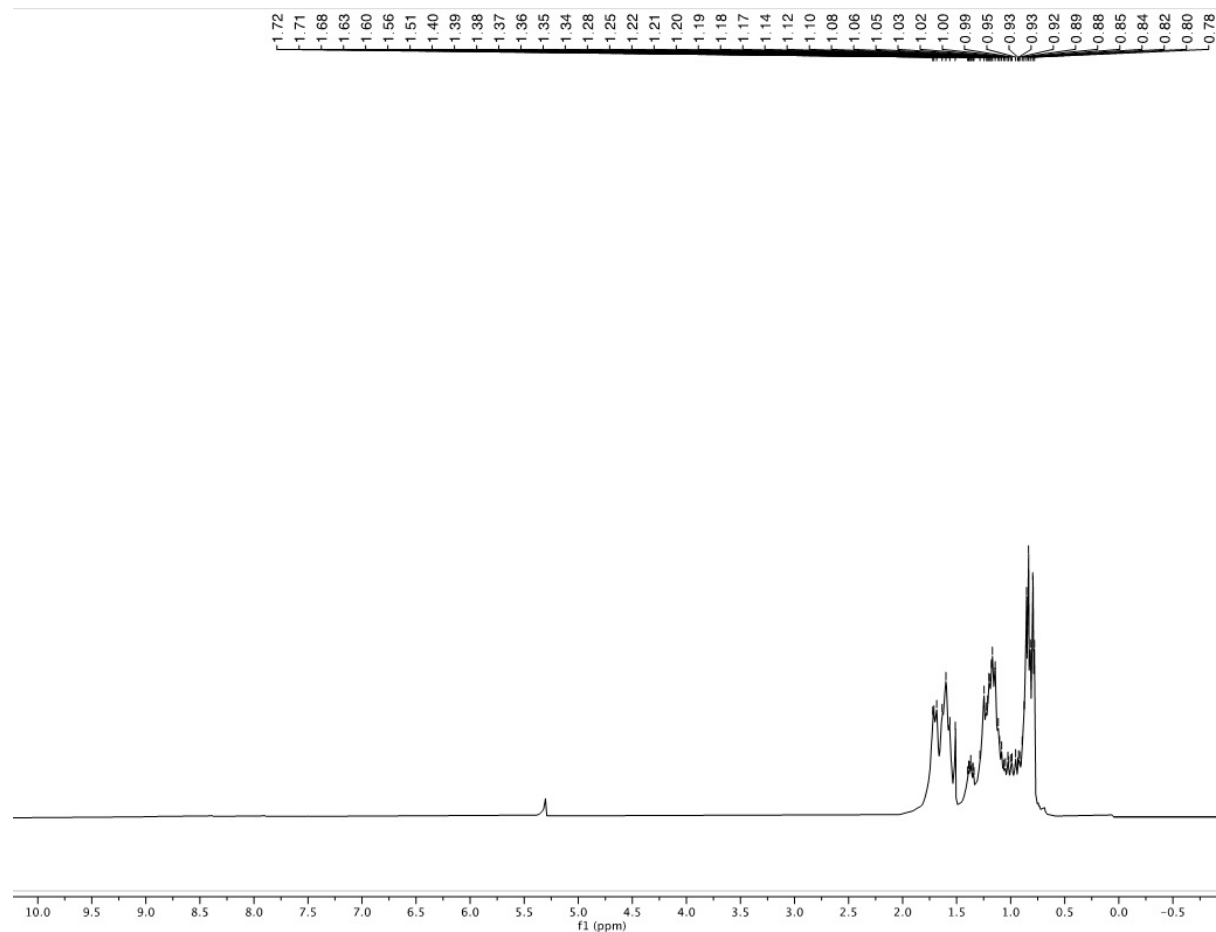

**Figure S46.** <sup>1</sup>H NMR spectrum of *sec*-butylcyclohexane (from S21) in CD<sub>2</sub>Cl<sub>2</sub>.

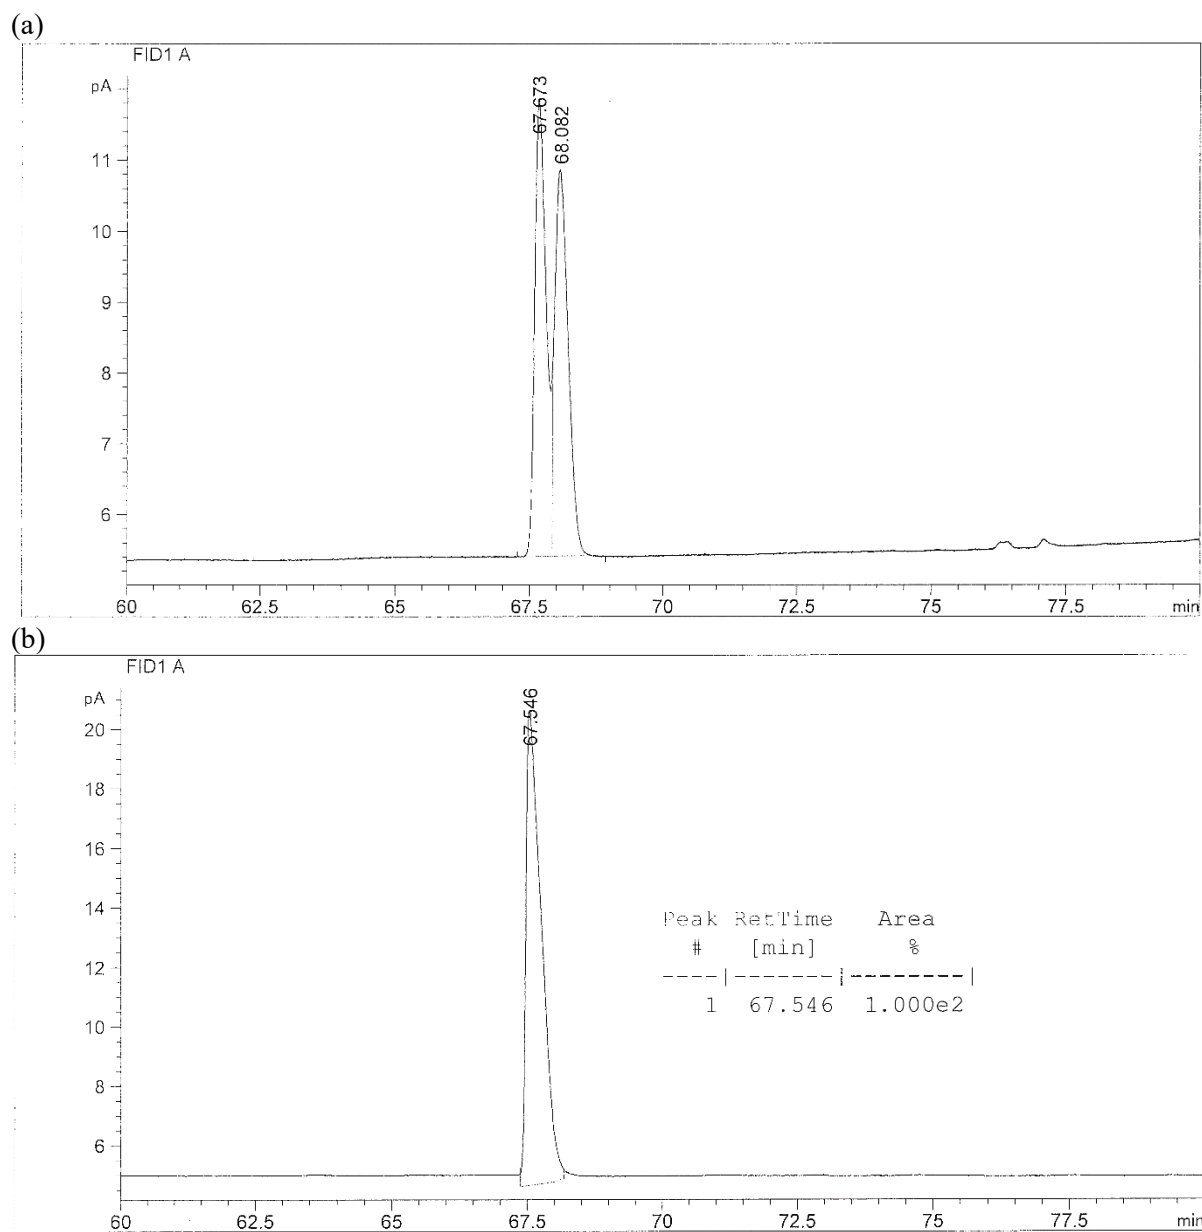

**Figure S47.** GC traces of (a) racemic and (b) enantioenriched product (>98% (*S*) ee using **4c** catalytic system; Table 3, entry 18).

**1-Benzyl-2,3-dihydro-1*H*-indene (from S22).**<sup>22</sup> Enantiomeric excess determined by HPLC using

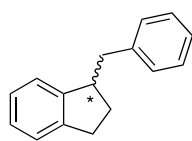

Chiracel OJ-H column (hexane/2-propanol=95/5, 0.5 mL/min, 210 nm).  $t_R$  11.1 min (*S*);  $t_R$  12.9 min (*R*).  $^1\text{H}$  NMR ( $\text{CDCl}_3$ ),  $\delta$ : 1.75–1.81 (m, 1H), 2.14–2.18 (m, 1H), 2.68 (dd, 1H,  $J=13.6$  Hz,  $J=9.2$  Hz), 2.75–2.92 (m, 2H), 3.15 (dd, 1H,  $J=13.6$  Hz,  $J=5.6$  Hz), 3.42–3.49 (m, 1H), 7.11–7.17 (m, 3H), 7.20–7.32 (m, 6H).

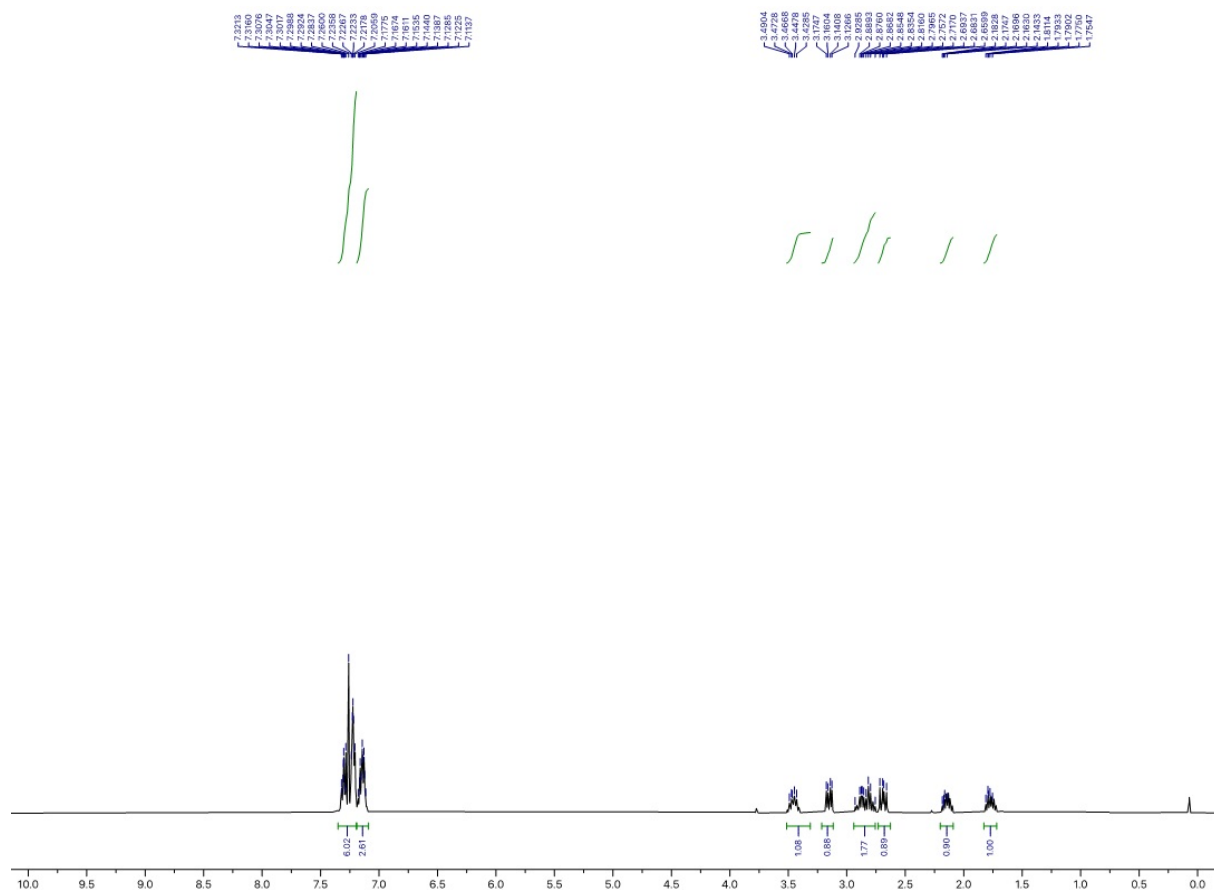

**Figure S48.**  $^1\text{H}$  NMR spectrum of 1-benzyl-2,3-dihydro-1*H*-indene (from S22) in  $\text{CDCl}_3$ .

(a)

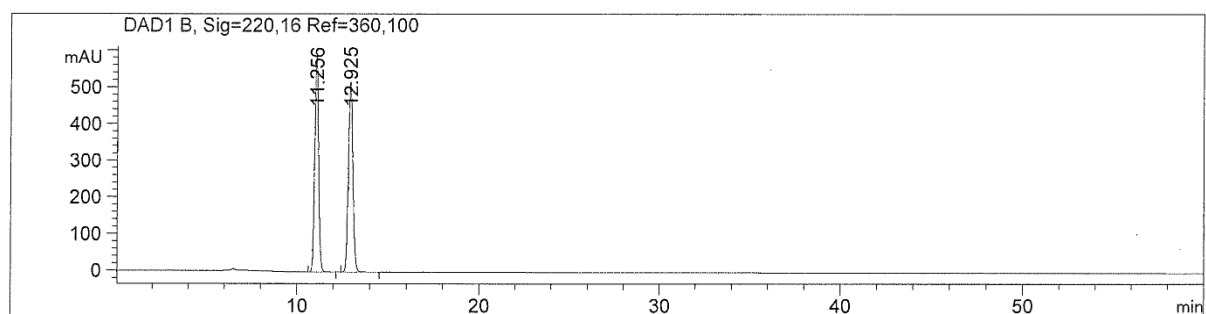

(b)

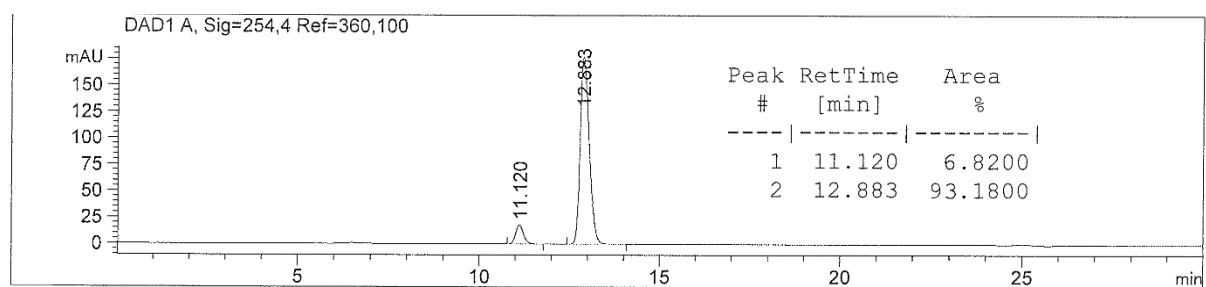

**Figure S49.** HPLC trace of (a) racemic and (b) enantioenriched product (86% (*R*) ee using **4c** catalytic system; Table 3, entry 19).



**1-(4-Methylbenzyl)-2,3-dihydro-1H-indene (from S23).**<sup>22</sup> Enantiomeric excess determined by HPLC

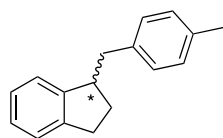

using Chiralcel OJ-H column (hexane/2-propanol=98/2, 0.5 ml/min, 254 nm).  $t_R$

11.2 min (*S*);  $t_R$  12.0 min (*R*).  $^1\text{H}$  NMR ( $\text{CDCl}_3$ ),  $\delta$ : 1.72–1.80 (m, 1H), 2.09–2.18

(m, 1H), 2.35 (s, 3H), 2.64 (dd, 1H,  $J=6.1$  Hz,  $J=13.5$  Hz), 2.75–2.93 (m, 2H),

3.12 (dd, 1H,  $J=5.6$  Hz,  $J=13.6$  Hz), 3.38–3.46 (m, 1H), 7.10–7.18 (m, 7H), 7.21–7.24 (m, 1H).

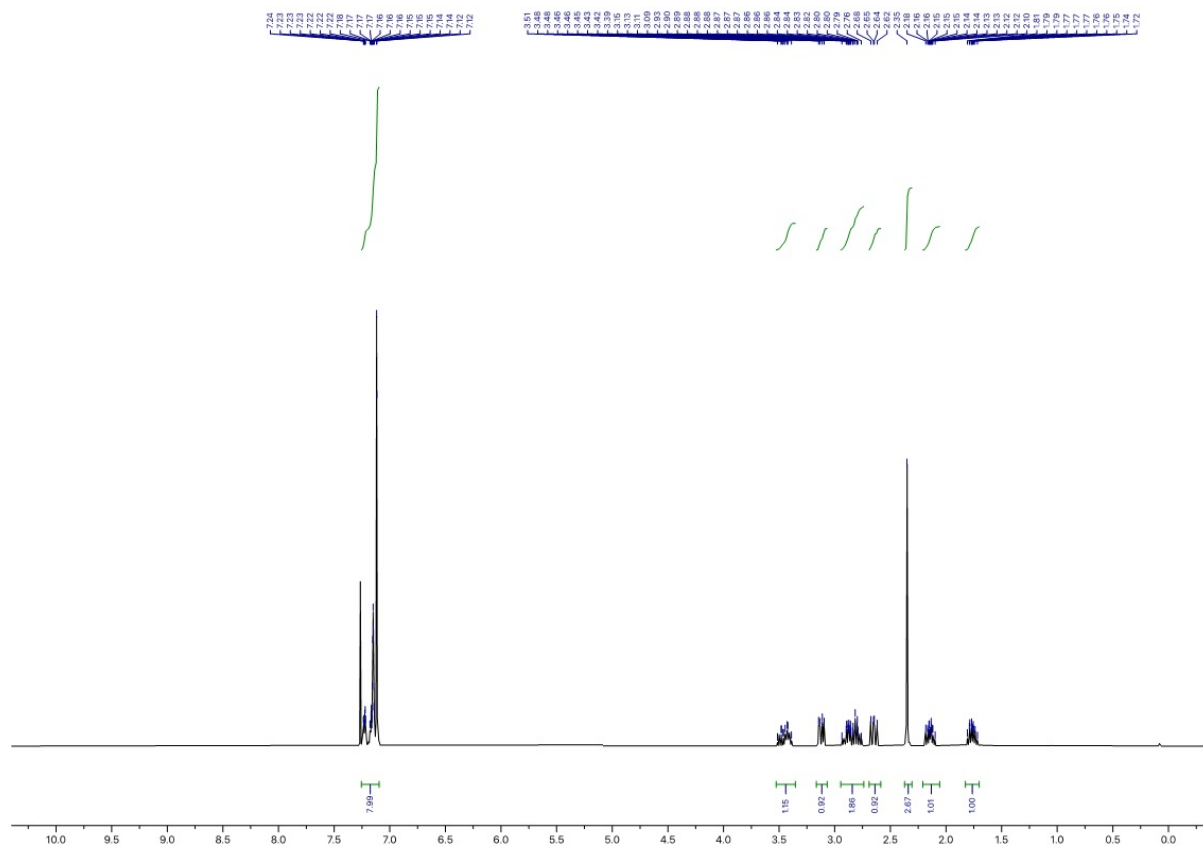

**Figure S50.**  $^1\text{H}$  NMR spectrum of 1-(4-methylbenzyl)-2,3-dihydro-1H-indene (from S23) in  $\text{CDCl}_3$ .

(a)

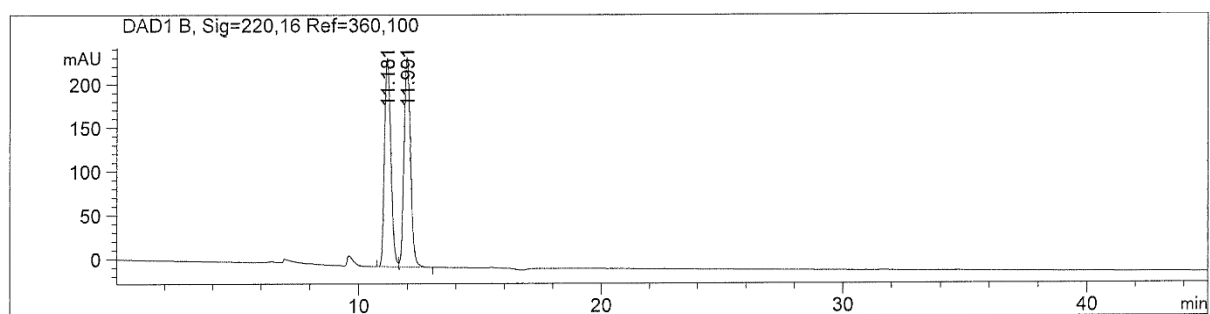

(b)

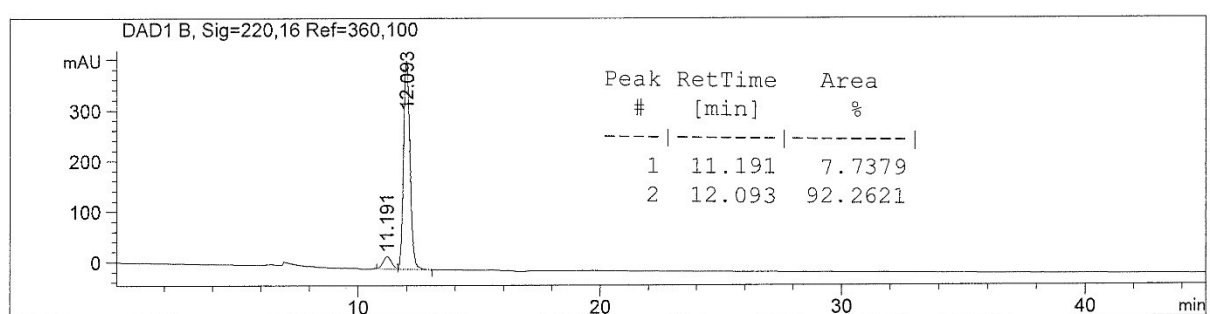

**Figure S51.** HPLC trace of: (a) racemic and (b) enantioenriched product (84% (*R*) ee using **4c** catalytic system; Table 3, entry 20).

**1-(4-Methoxybenzyl)-2,3-dihydro-1H-indene (from S24).**<sup>23</sup> Enantiomeric excess determined by HPLC

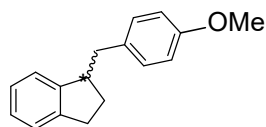

using Chiralcel OJ-H column (95% 2-propanol/hexane, flow 0.5 ml/min,  $\lambda = 226$  nm).  $t_R$  15.1 min (*S*);  $t_R$  17.3 min (*R*).  $^1\text{H NMR}$  ( $\text{CDCl}_3$ ),  $\delta$ : 1.65–1.70 (m, 1H), 2.04–2.09 (m, 1H), 2.57 (dd, 1H,  $J = 13.9$  Hz,  $J = 8.6$  Hz), 2.71–2.80 (m, 2H), 3.00 (dd, 1H,  $J = 13.5$  Hz,  $J = 5.5$  Hz), 3.31–3.35 (m, 1H), 3.74 (s, 3H), 6.76–6.78 (m, 2H), 7.03–7.15 (m, 6H).

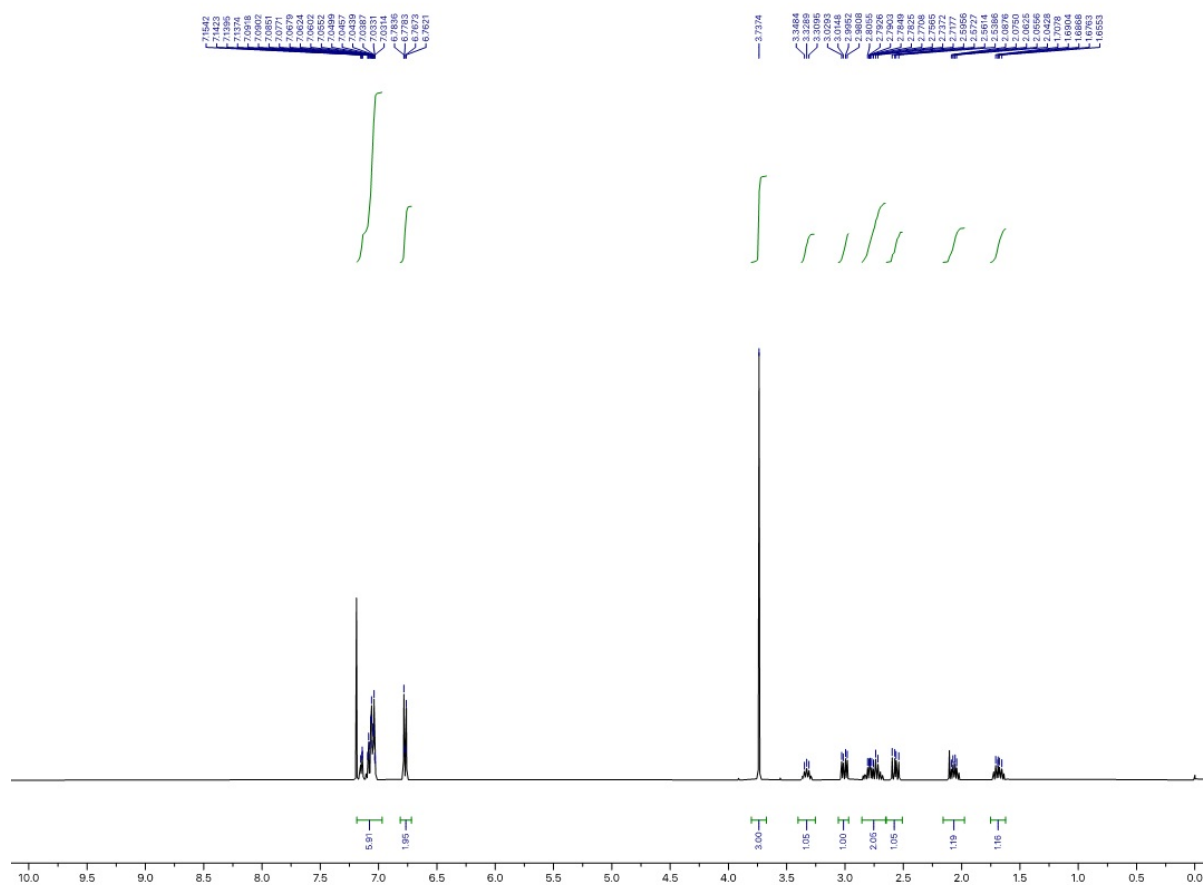

**Figure S52.**  $^1\text{H NMR}$  spectrum of 1-(4-methoxybenzyl)-2,3-dihydro-1H-indene (from S24) in  $\text{CDCl}_3$ .

(a)

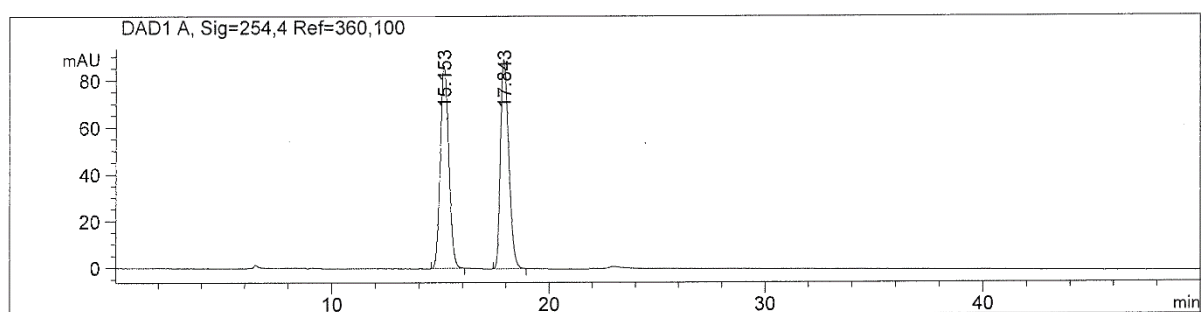

(b)

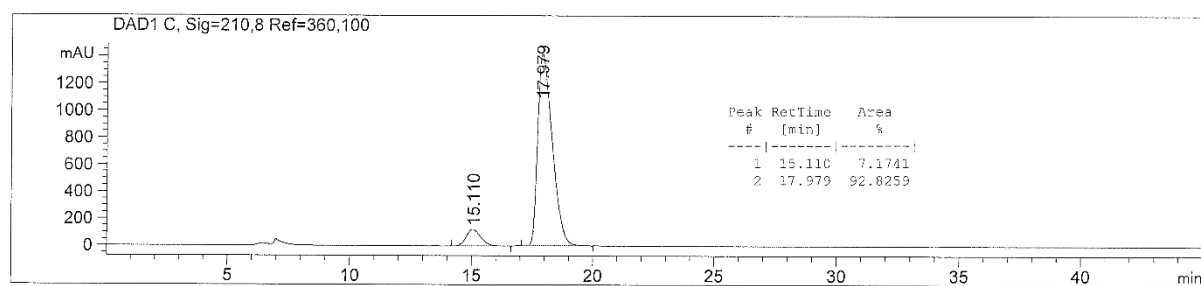

**Figure S53.** HPLC trace of: (a) racemic and (b) enantioenriched product (85% (*R*) ee using **4c** catalytic system; Table 3, entry 21).

**1-(2-Methylbenzyl)-2,3-dihydro-1H-indene (from S25).**<sup>23</sup> Enantiomeric excess determined by HPLC using Chiralcel OD-H column (98% 2-propanol/hexane, flow 0.5 ml/min,  $\lambda = 226$  nm).  $t_R$  8.7 min (*R*);  $t_R$  9.4 min (*S*). <sup>1</sup>H NMR (CDCl<sub>3</sub>),  $\delta$ : 1.71–1.76 (m, 1H), 2.06–2.11 (m, 1H), 2.23 (s, 3H), 2.60 (dd, 1H,  $J = 13.7$  Hz,  $J = 9.0$  Hz), 2.73–2.77 (m, 1H), 2.86–2.90 (m, 1H), 3.07 (dd, 1H,  $J = 13.7$  Hz,  $J = 5.5$  Hz), 3.33–3.40 (m, 1H), 7.03–7.11 (m, 7H), 7.16–7.18 (m, 1H).

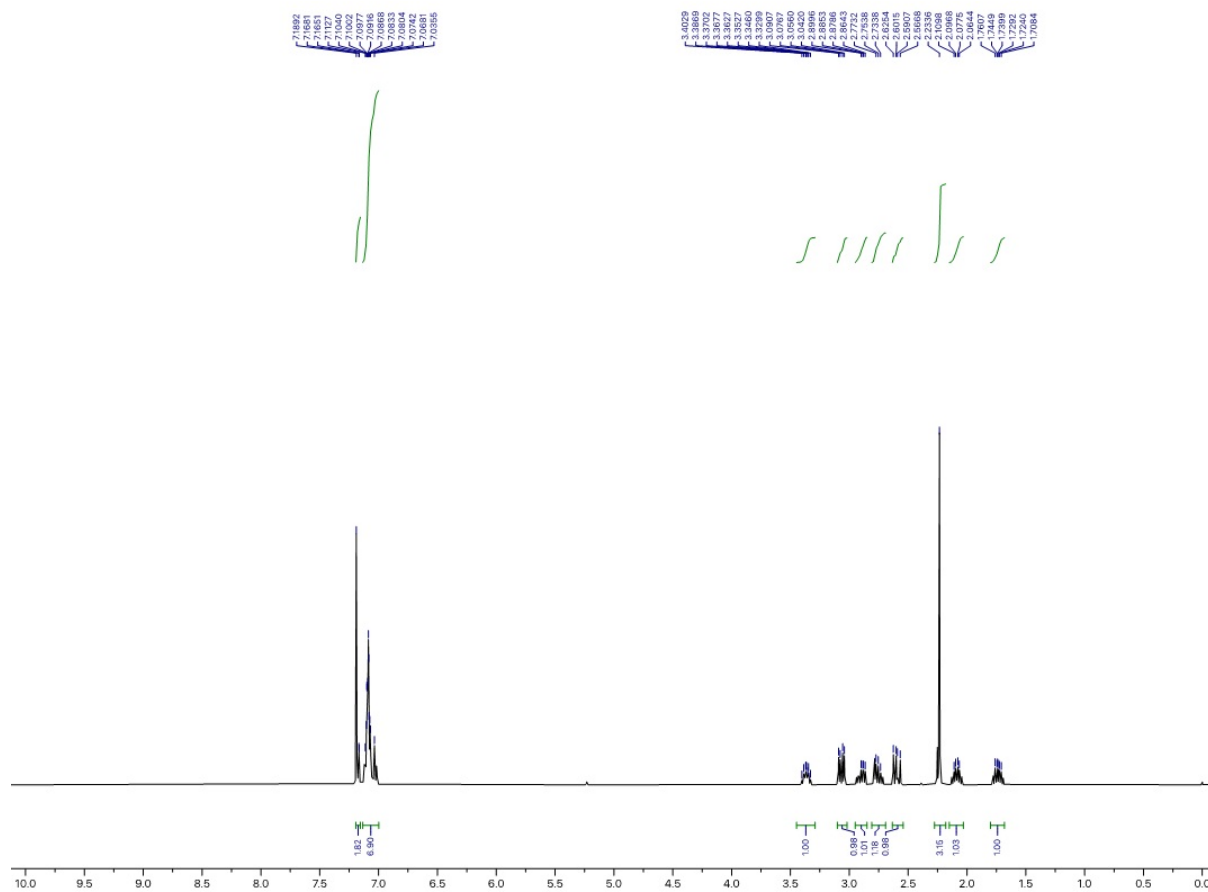

**Figure S54.** <sup>1</sup>H NMR spectrum of 1-(2-methylbenzyl)-2,3-dihydro-1H-indene (from S25) in CDCl<sub>3</sub>.

(a)

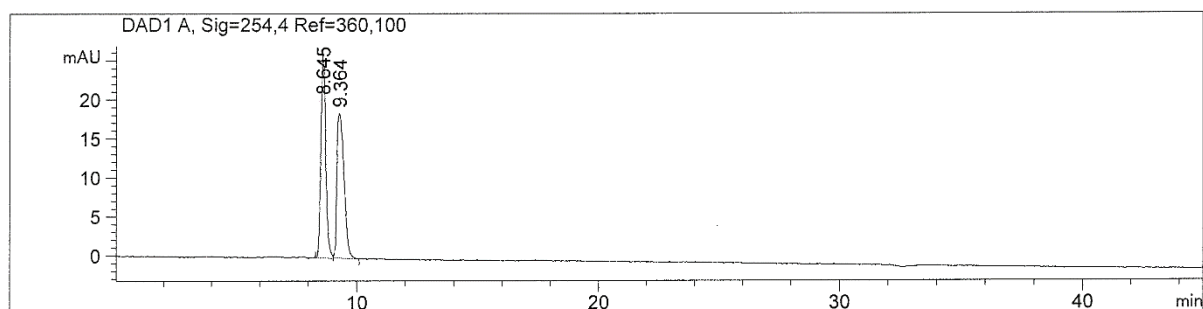

(b)

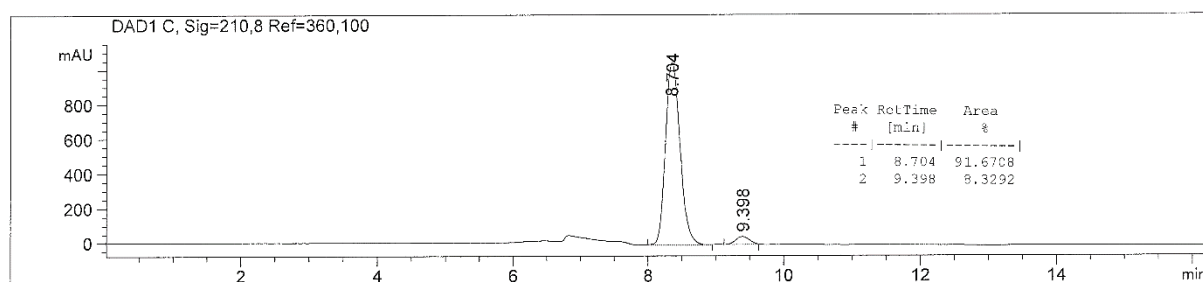

**Figure S55.** HPLC trace of enantioenriched product (83% (*R*) ee using **4c** catalytic system; Table 3, entry 22).

**1-Benzyl-1,2,3,4-tetrahydronaphthalene (from S26).**<sup>22</sup> Enantiomeric excess determined by HPLC using Chiracel OJ-H column (hexane/2-propanol=95/5, 0.5 mL/min, 226 nm).  $t_R$  9.6 min (*S*);  $t_R$  11.5 min (*R*).  $^1\text{H NMR}$  ( $\text{CDCl}_3$ ),  $\delta$ : 1.55–1.63 (m, 3H), 1.78–1.83 (m, 1H), 2.64–2.73 (m, 3H), 3.03–3.06 (m, 2H), 7.03–7.07 (m, 3H), 7.14–7.19 (m, 4H), 7.22–7.24 (m, 2H).

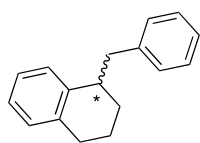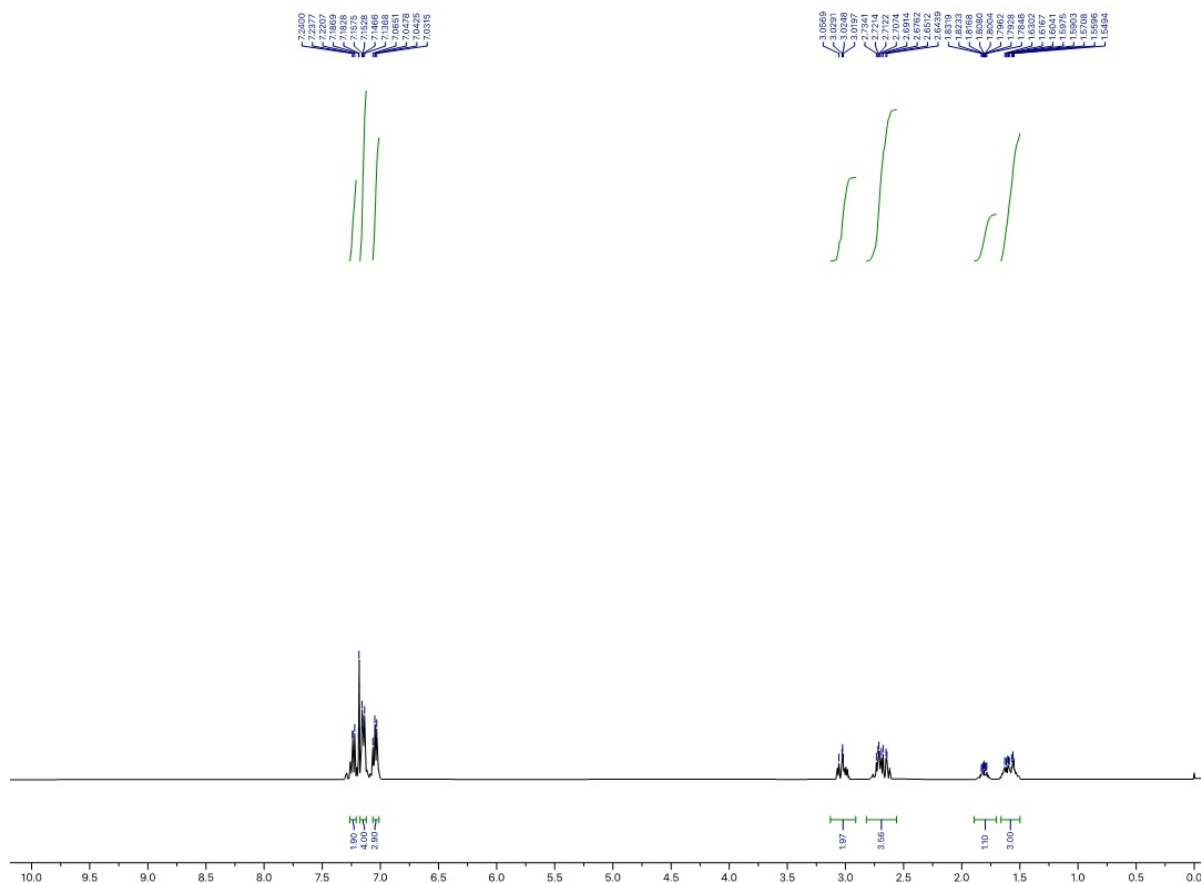

**Figure S56.**  $^1\text{H NMR}$  spectrum of 1-benzyl-1,2,3,4-tetrahydronaphthalene (from S26) in  $\text{CDCl}_3$ .

(a)

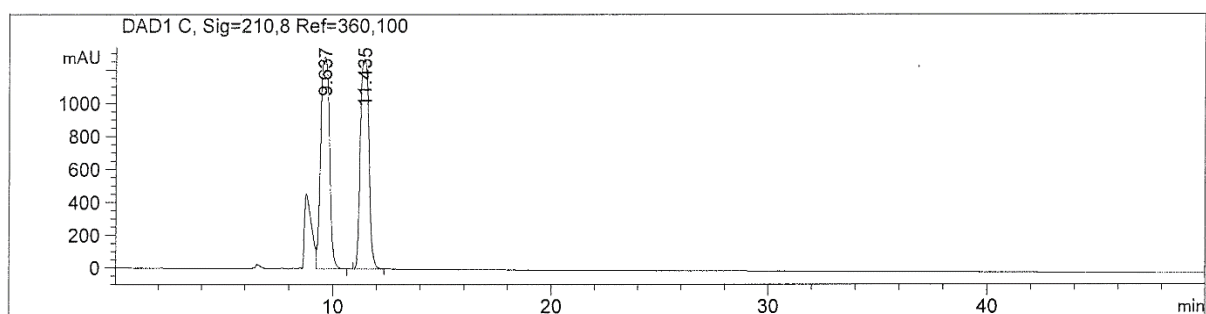

(b)

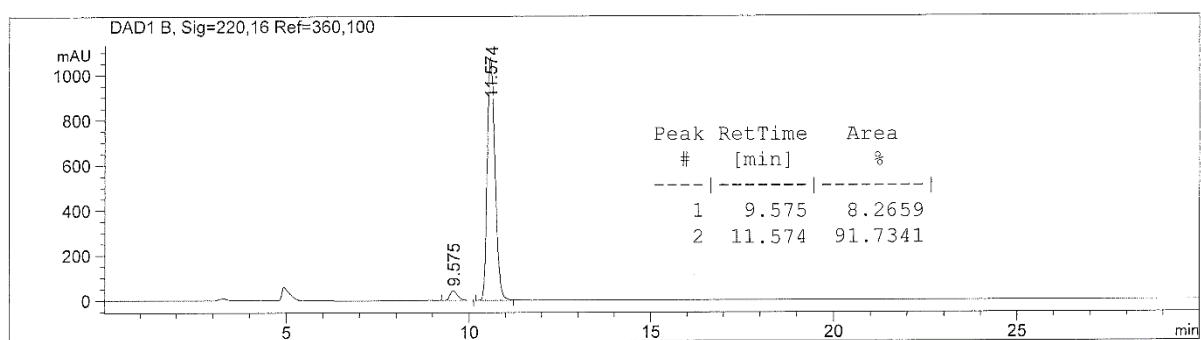

**Figure S57.** HPLC trace of: (a) racemic and (b) enantioenriched product (83% (*R*) ee using **4c** catalytic system; Table 3, entry 23).



**1-(4-Methylbenzyl)-1,2,3,4-tetrahydronaphthalene (from S27).**<sup>23</sup> Enantiomeric excess determined by

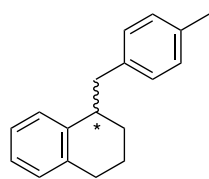

HPLC using Chiralcel OJ-H column (98% 2-propanol/hexane, flow 0.5 ml/min,  $\lambda = 254$  nm).  $t_R$  14.1min (*S*);  $t_R$  15.2 min (*R*).  $^1\text{H NMR}$  ( $\text{CDCl}_3$ ),  $\delta$ : 1.49–1.64 (m, 3H), 1.78–1.81 (m, 1H), 2.27 (s, 3H), 2.60–2.73 (m, 3H), 2.95–3.03 (m, 2H), 7.02–7.18 (m, 8H).

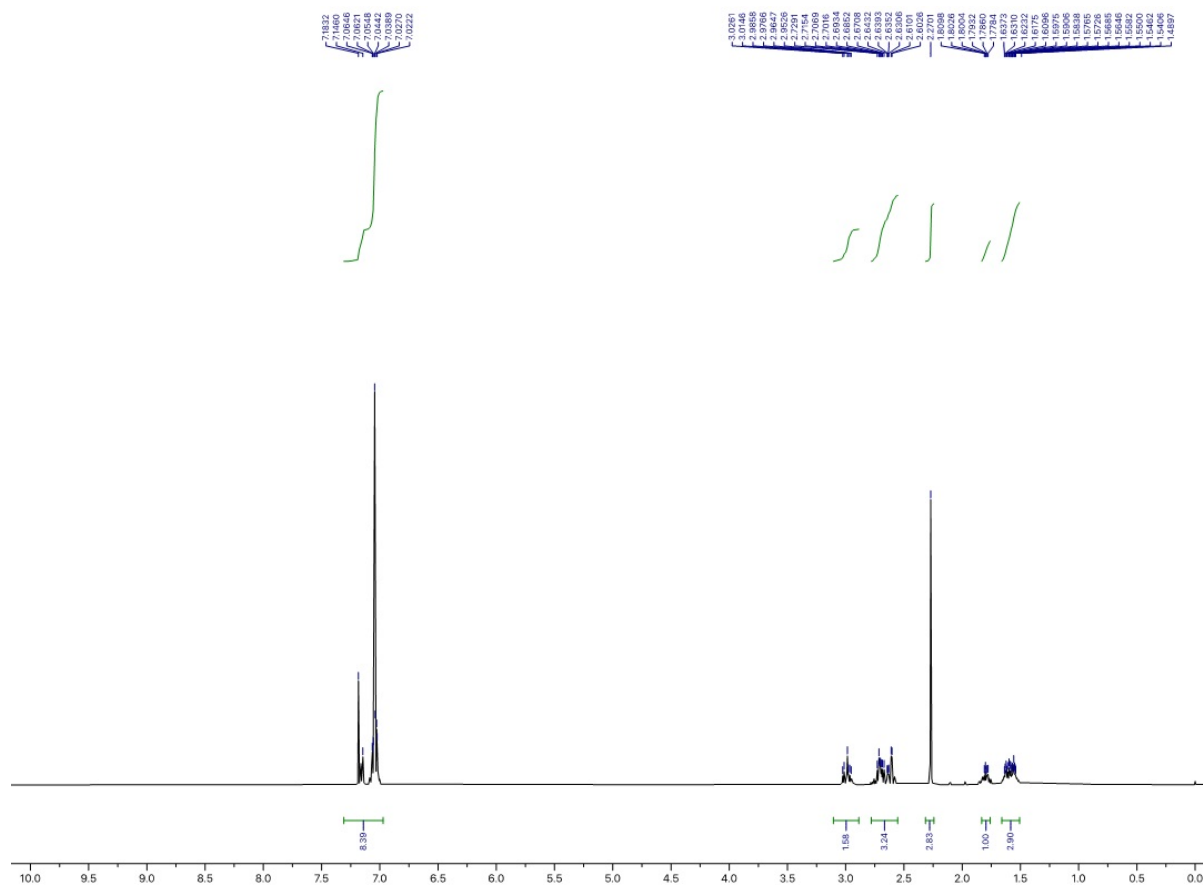

**Figure S58.**  $^1\text{H NMR}$  spectrum of 1-(4-methylbenzyl)-1,2,3,4-tetrahydronaphthalene (from S27) in  $\text{CDCl}_3$ .

(a)

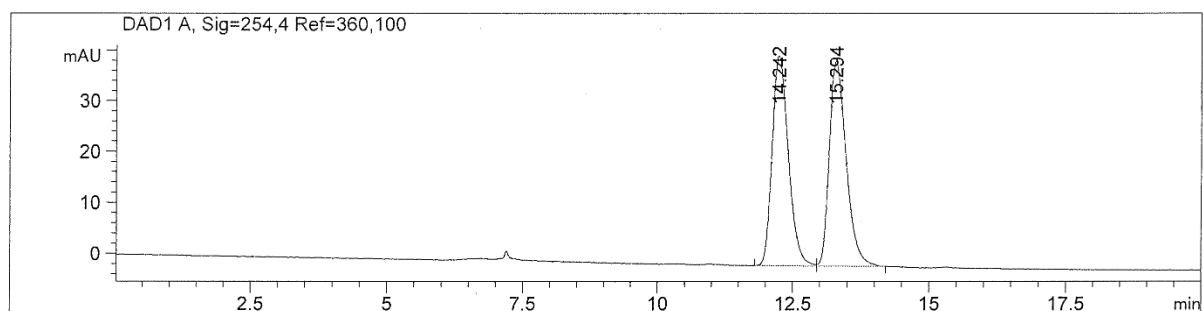

(b)

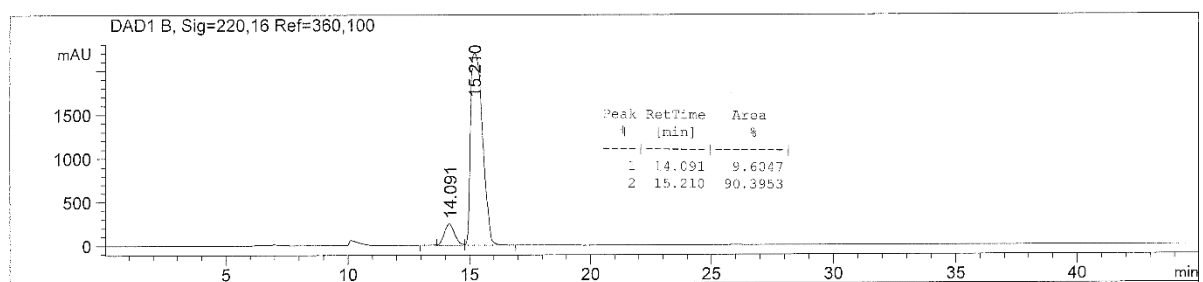

**Figure S59.** HPLC trace of: (a) racemic and (b) enantioenriched product (81% (*R*) ee using **4c** catalytic system; Table 3, entry 24).

**1-(4-Chlorobenzyl)-1,2,3,4-tetrahydronaphthalene (from S28).**<sup>23</sup> Enantiomeric excess determined by

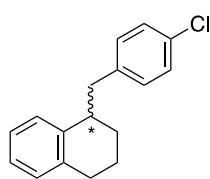

HPLC using Chiralcel OJ-H column (98% 2-propanol/hexane, flow 0.5 ml/min,  $\lambda = 220$  nm).  $t_R$  12.4 min (*S*);  $t_R$  13.9 min (*R*).  $^1\text{H NMR}$  ( $\text{CDCl}_3$ ),  $\delta$ : 1.62–1.66 (m, 3H), 1.75–1.82 (m, 1H), 2.63–2.73 (m, 3H), 2.95–3.02 (m, 2H), 7.03–7.07 (m, 5H), 7.19–7.21 (m, 3H).

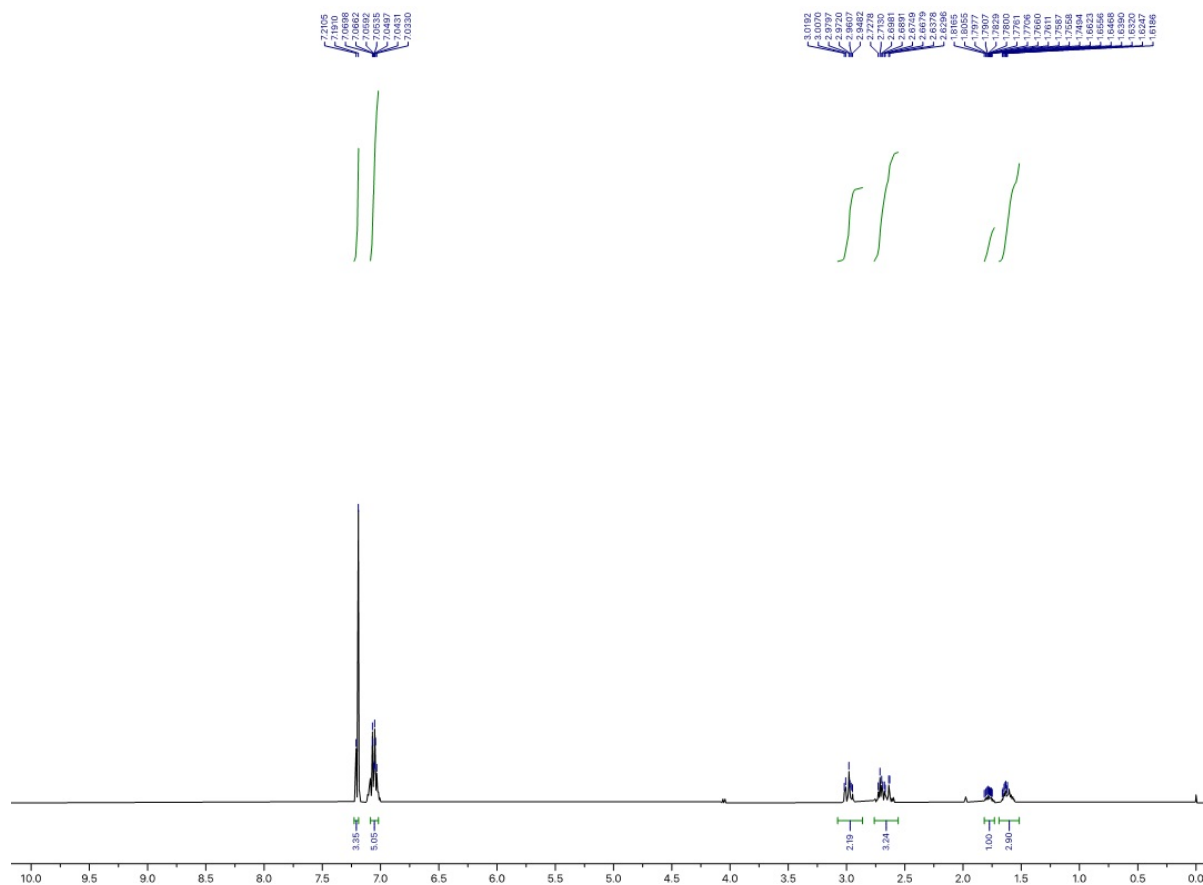

**Figure S60.**  $^1\text{H NMR}$  spectrum of 1-(4-chlorobenzyl)-1,2,3,4-tetrahydronaphthalene (from S28) in  $\text{CDCl}_3$ .

(a)

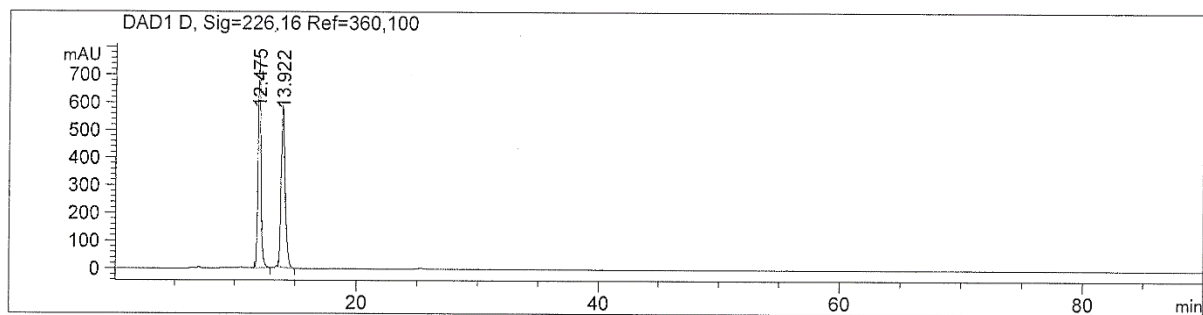

(b)

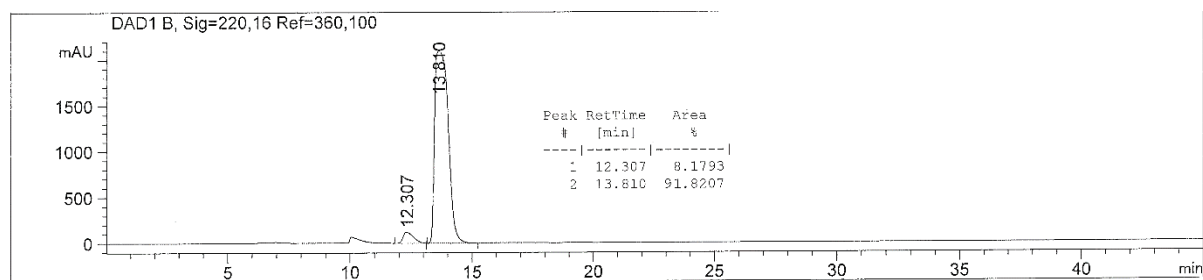

**Figure S61.** HPLC trace of: (a) racemic and (b) enantioenriched product (83% (*R*) ee using **4c** catalytic system; Table 3, entry 25).

**1-(2-Methylbenzyl)-1,2,3,4-tetrahydronaphthalene (from S29).**<sup>23</sup> Enantiomeric excess determined by

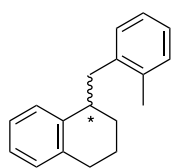

HPLC using Chiralcel OJ-H column (98% 2-propanol/hexane, flow 0.5 ml/min,  $\lambda = 226$  nm).  $t_R$  9.9 min (*S*);  $t_R$  10.7 min (*R*).  $^1\text{H NMR}$  ( $\text{CDCl}_3$ ),  $\delta$ : 1.66–1.76 (m, 3H), 1.89–1.99 (m, 1H), 2.36 (s, 3H), 2.75–2.83 (m, 3H), 3.08–3.11 (m, 2H), 7.11–7.17 (m, 8H).

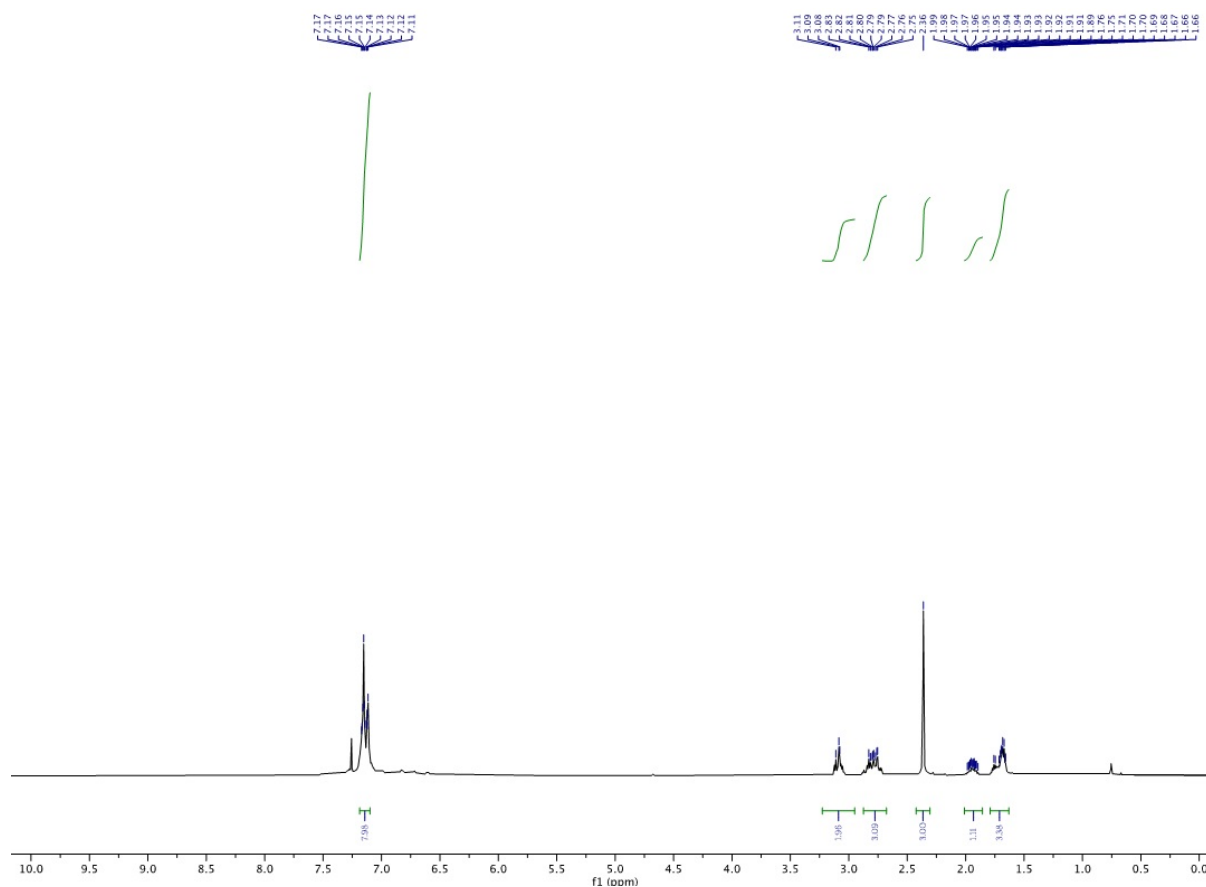

**Figure S62.**  $^1\text{H NMR}$  spectrum of 1-(2-methylbenzyl)-1,2,3,4-tetrahydronaphthalene (from S29) in  $\text{CDCl}_3$ .

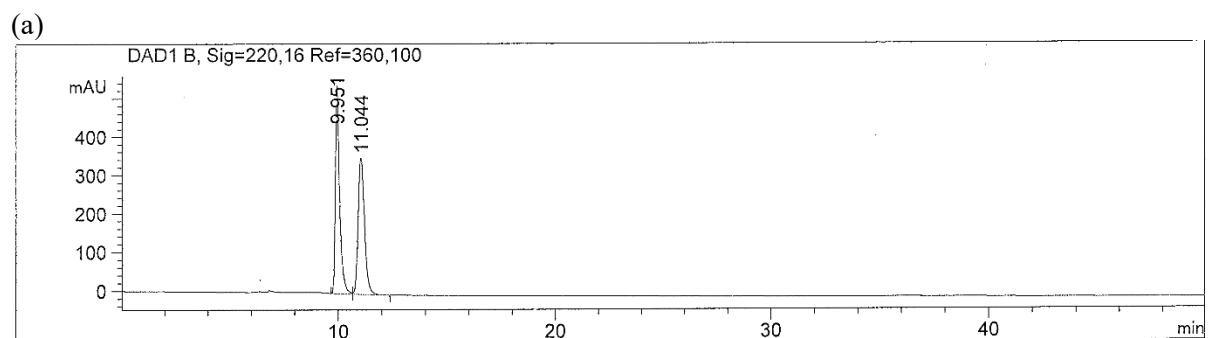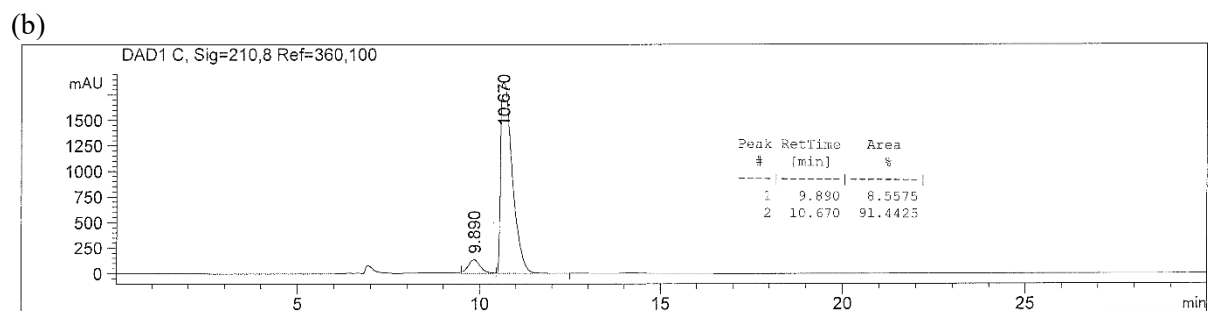

**Figure S63.** HPLC trace of: (a) racemic and (b) enantioenriched product (83% (*R*) ee using **4c** catalytic system; Table 3, entry 26).

**1-Benzylbenzocyclobutene (from S30).**<sup>23</sup> Enantiomeric excess determined by GC using Hydrodex  $\beta$ -3P column (90 kPa H<sub>2</sub>, 90 °C, 15 min - 1 °C/min - 180 °C).  $t_R$  63.6 min (*S*);  $t_R$  64.0 min (*R*). <sup>1</sup>H NMR (CDCl<sub>3</sub>),  $\delta$ : 2.90 (dd,  $J=14.2$  Hz,  $J=2.8$  Hz, 1H), 2.99–3.02 (m, 2H), 3.34 (dd,  $J=14.2$  Hz,  $J=5.1$  Hz, 1H), 3.74–3.77 (m, 1H), 6.85–6.87 (m, 1H), 7.07–7.35 (m, 8H).

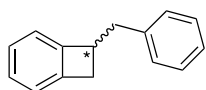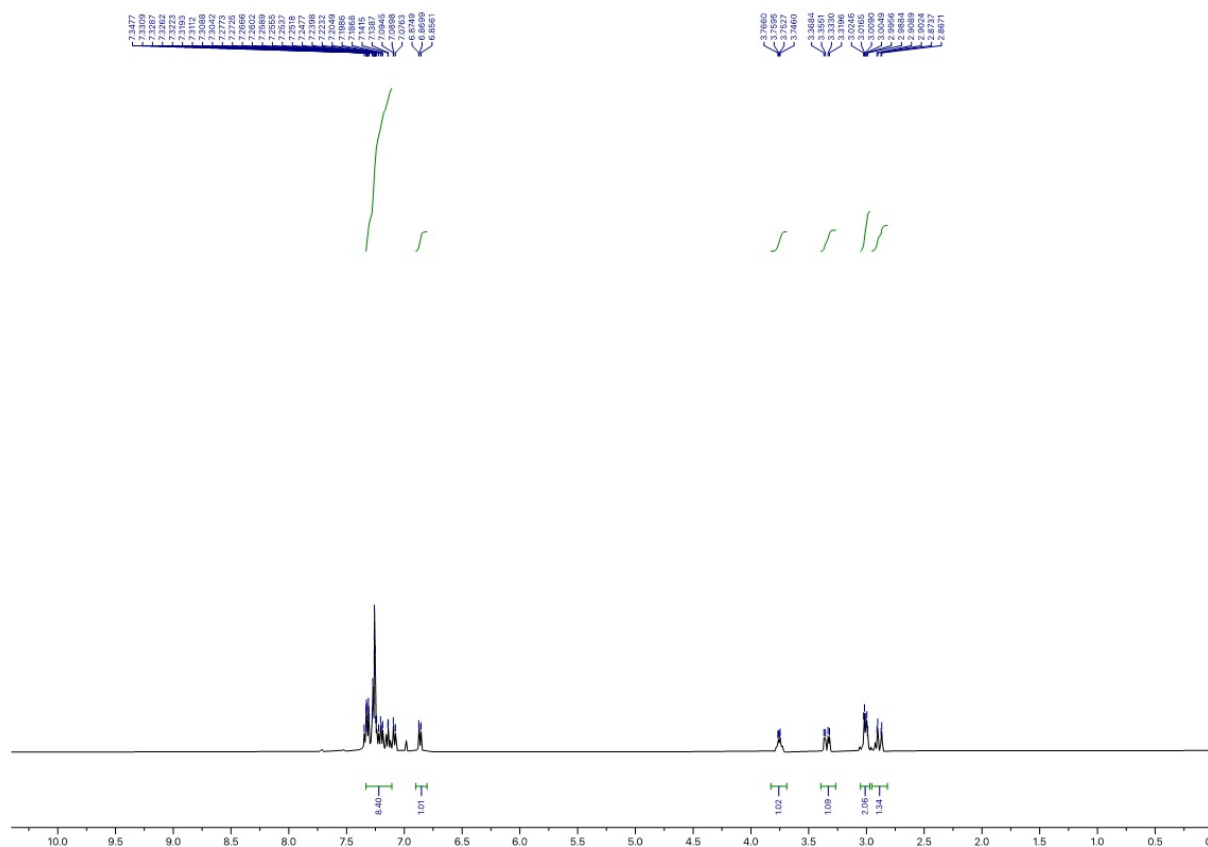

**Figure S64.** <sup>1</sup>H NMR spectrum of 1-benzylbenzocyclobutene (from S30) in CDCl<sub>3</sub>.

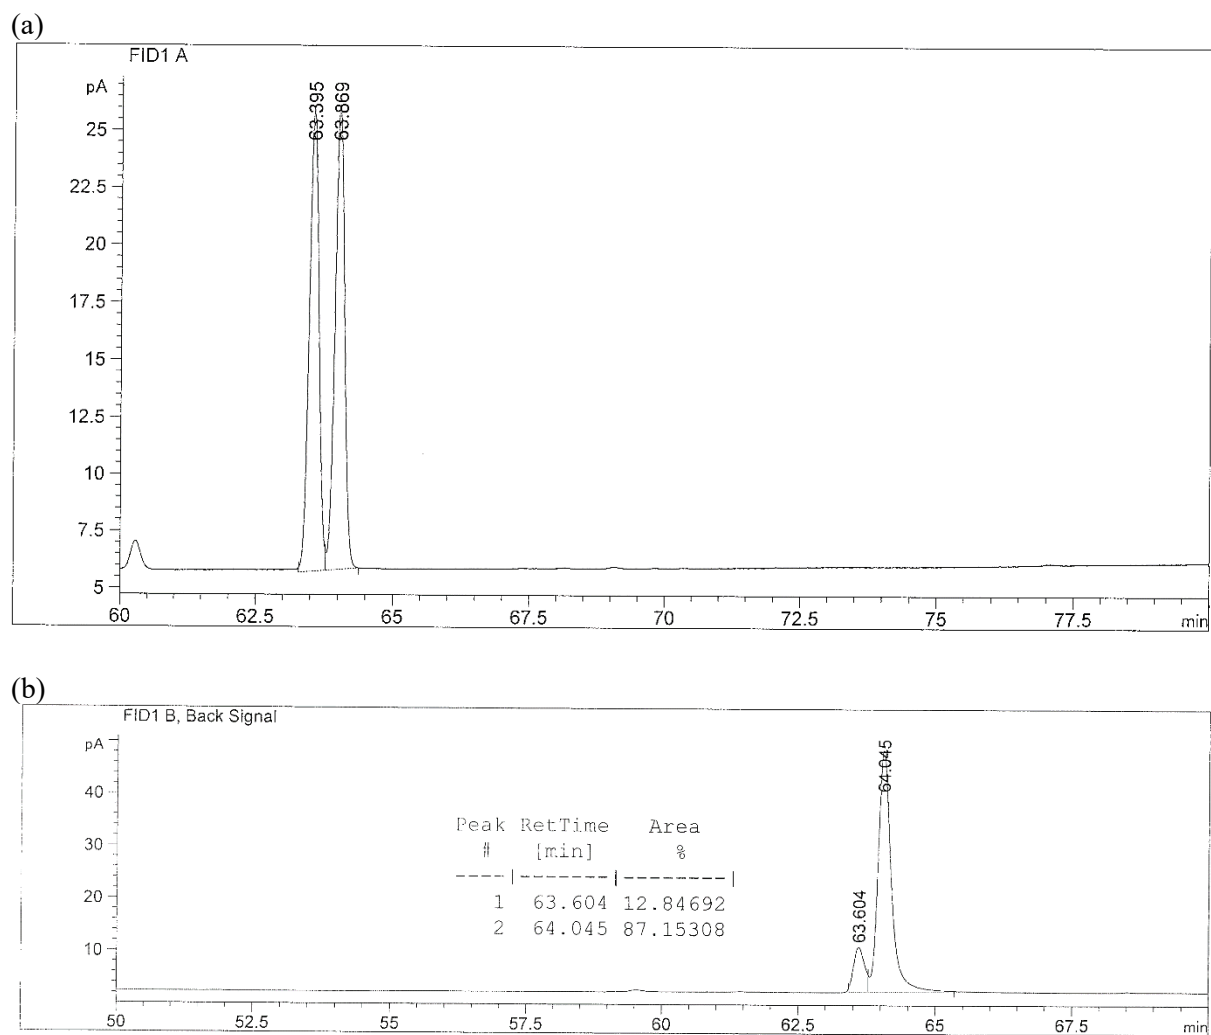

**Figure S65.** HPLC trace of enantioenriched product (74% (*R*) ee using **4c** catalytic system; Table 3, entry 27).



**3-Methyl-4-phenylbutan-2-one (from S31).**<sup>25</sup> Enantiomeric excess determined by HPLC using

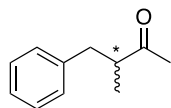

Chiracel OJ-H column (hexane/2-propanol=97/3, 1 mL/min, 220 nm).  $t_R$  8.9 min (*S*);

$t_R$  9.3 min (*R*).  $^1\text{H}$  NMR ( $\text{CDCl}_3$ ),  $\delta$ : 1.10 (d, 3H,  $J= 6.9$  Hz), 2.10 (s, 3H), 2.57 (dd,

1H,  $J= 13.5$  Hz,  $J= 7.7$  Hz), 2.82-2.87 (m, 1H), 3.01 (dd, 1H,  $J= 13.5$  Hz,  $J= 6.8$  Hz),

7.15-7.17 (m, 3H), 7.21-7.31 (m, 2H).

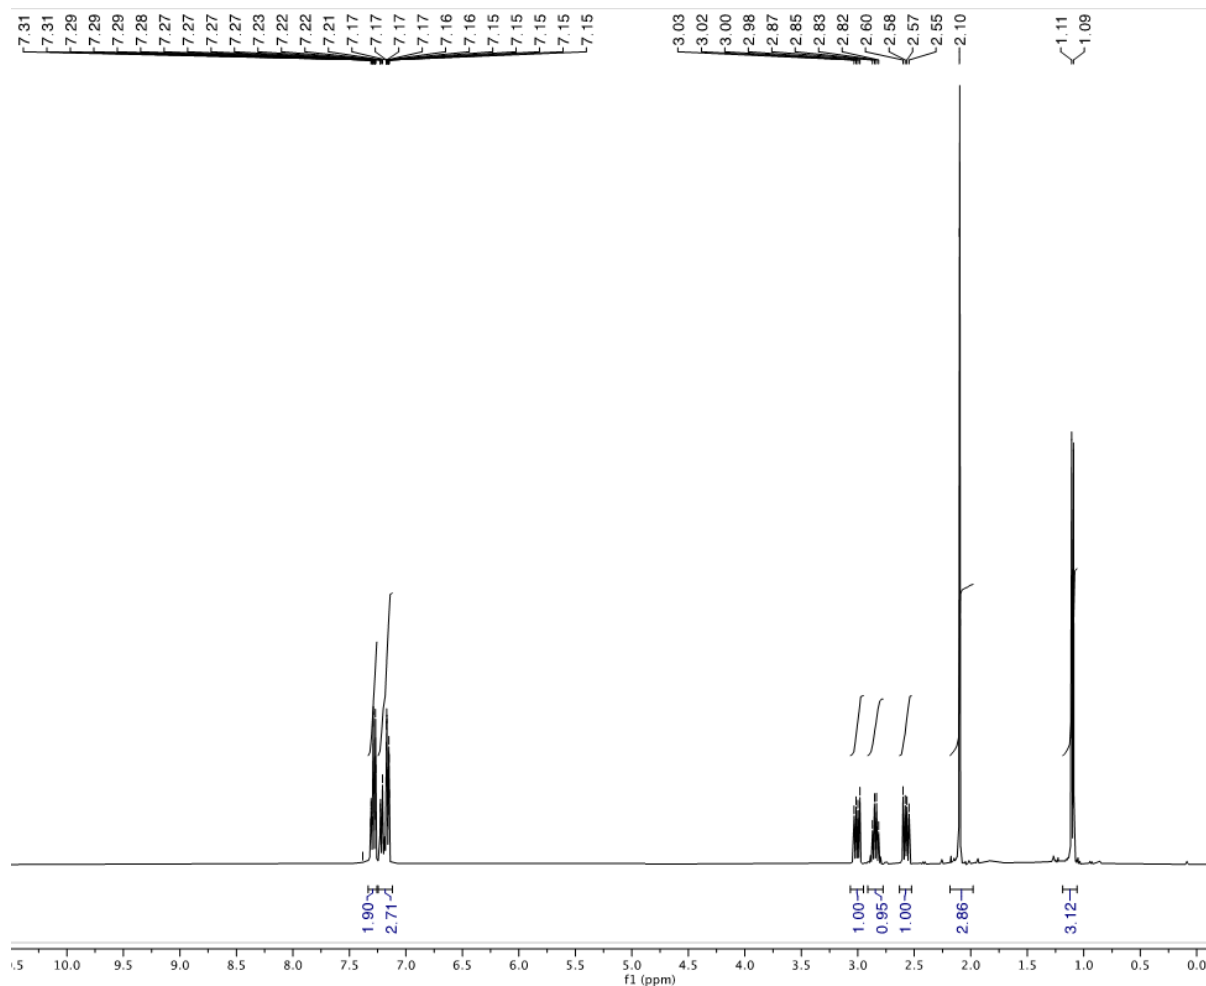

**Figure S66.**  $^1\text{H}$  NMR spectrum of 3-methyl-4-phenylbutan-2-one (from S31) in  $\text{CDCl}_3$ .

(a)

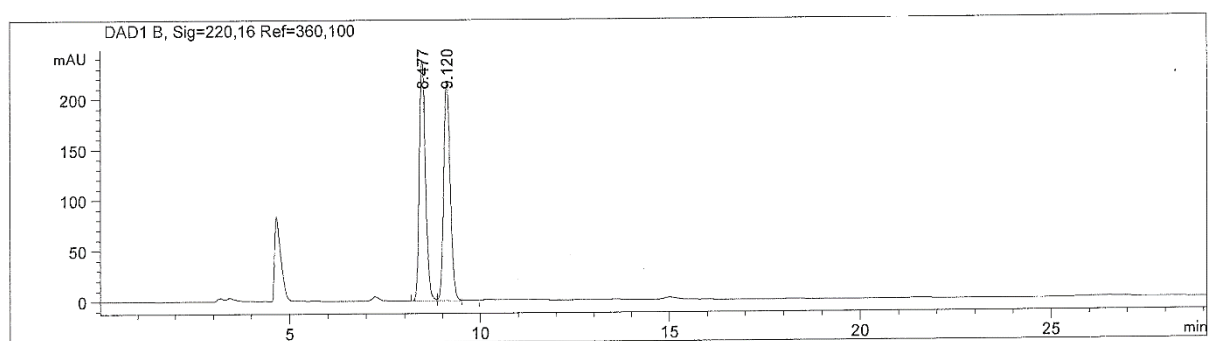

(b)

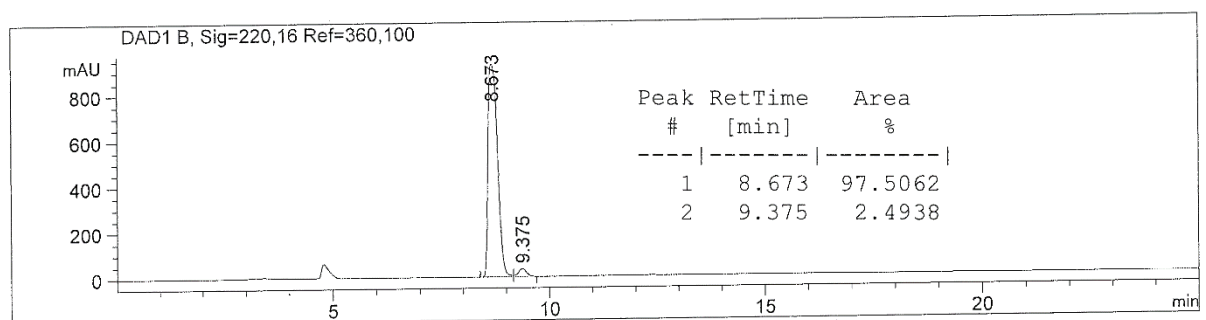

**Figure S67.** HPLC trace of (a) racemic and (b) enantioenriched product (95% (*S*) ee using **4a** catalytic system; Scheme 2).

**4-(4-Methoxyphenyl)-3-methylbutan-2-one (from S32).**<sup>44</sup> Enantiomeric excess determined by HPLC

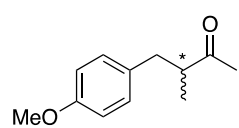

using Chiracel OJ-H column (hexane/2-propanol=95/5, 0.5 mL/min, 220 nm).  $t_R$

27.4 min (*S*);  $t_R$  29.8 min (*R*).  $^1\text{H NMR}$  ( $\text{CDCl}_3$ ),  $\delta$ : 1.07 (d, 3H,  $J= 6.9$  Hz), 2.08

(s, 3H), 2.52 (dd, 1H,  $J= 7.5$  Hz,  $J= 13.6$  Hz), 2.78-2.81 (m, 1H), 2.92 (dd, 1H,

$J= 6.9$  Hz,  $J= 13.6$  Hz), 3.78 (s, 3H), 6.81 (d, 2H,  $J= 8.6$  Hz), 7.05-7.07 (m, 2H).

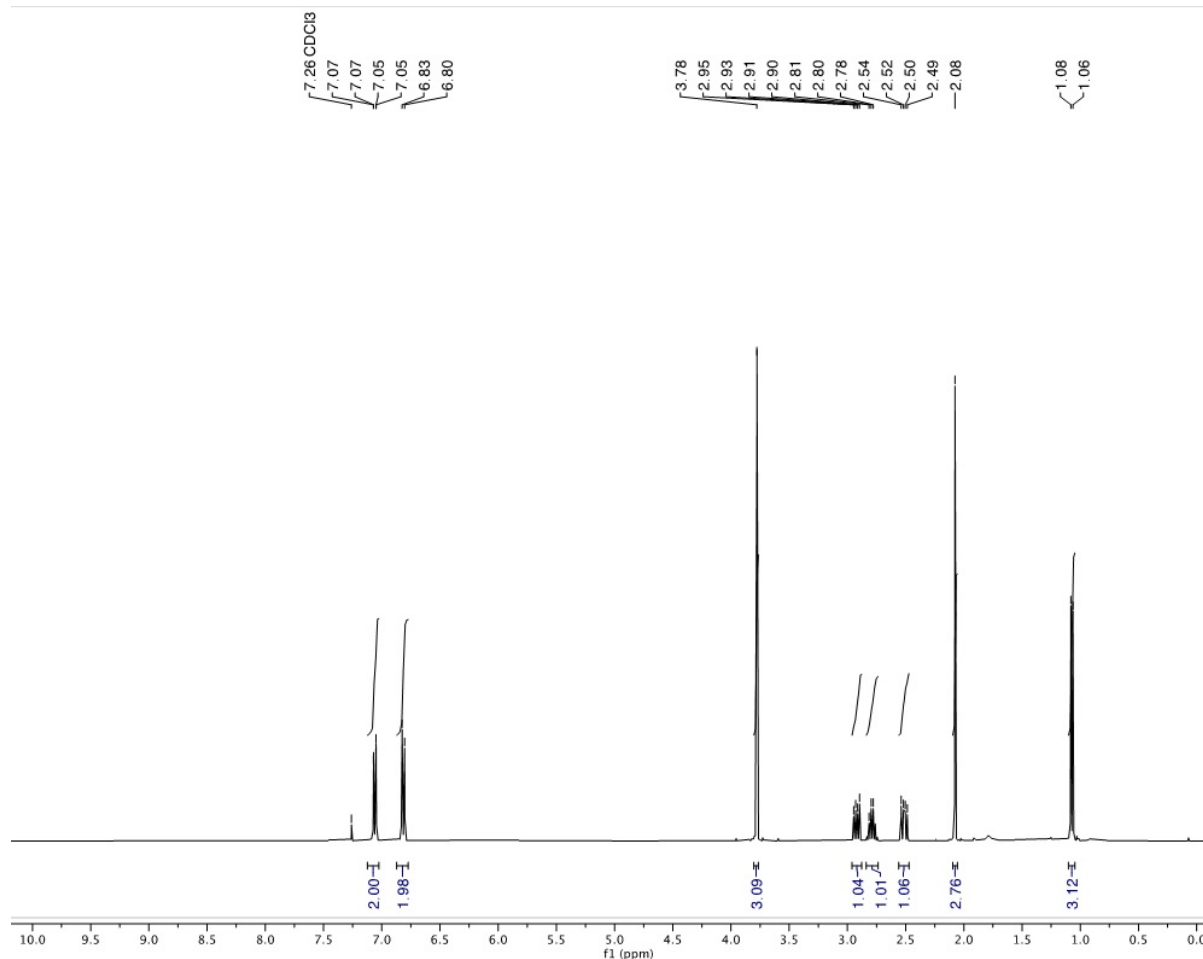

**Figure S68.**  $^1\text{H NMR}$  spectrum of 4-(4-methoxyphenyl)-3-methylbutan-2-one (from S32) in  $\text{CDCl}_3$ .

(a)

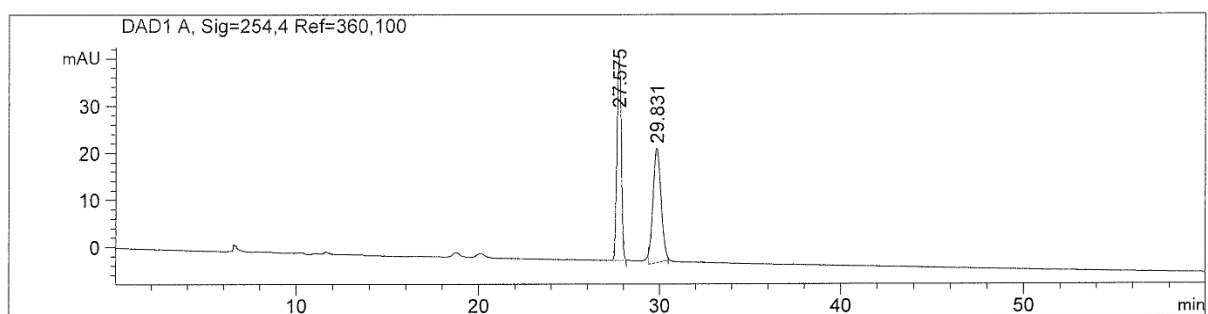

(b)

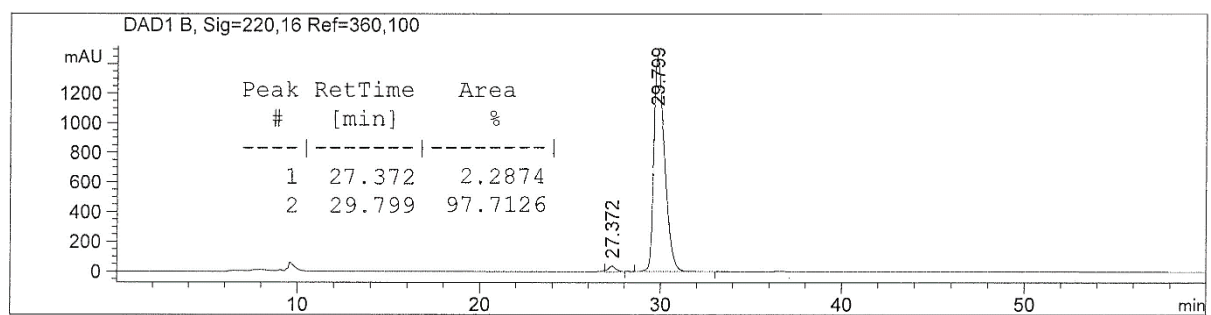

**Figure S69.** HPLC trace of enantioenriched product (95% (*S*) ee using **4a** catalytic system; Scheme

2).

**2-Methyl-1-phenylpentan-3-one (from S33).**<sup>44</sup> Enantiomeric excess determined by HPLC using

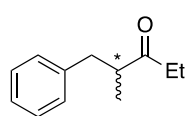

Chiracel OJ-H column (hexane/2-propanol=99/1, 0.5 mL/min, 220 nm).  $t_R$  16.5 min

(*S*);  $t_R$  18.7 min (*R*).  $^1\text{H NMR}$  ( $\text{CDCl}_3$ ),  $\delta$ : 0.97 (t, 3H,  $J=7.2$  Hz), 1.09 (d, 3H,  $J=6.8$

Hz), 2.23-2.31 (m, 1H), 2.39-2.47 (m, 1H), 2.57 (dd, 1H,  $J=7.3$  Hz,  $J=13.4$  Hz),

2.82-2.88 (m, 1H), 2.98 (dd, 1H,  $J=7.2$  Hz,  $J=13.3$  Hz), 7.13-7.22 (m, 3H), 7.25-7.30 (m, 2H).

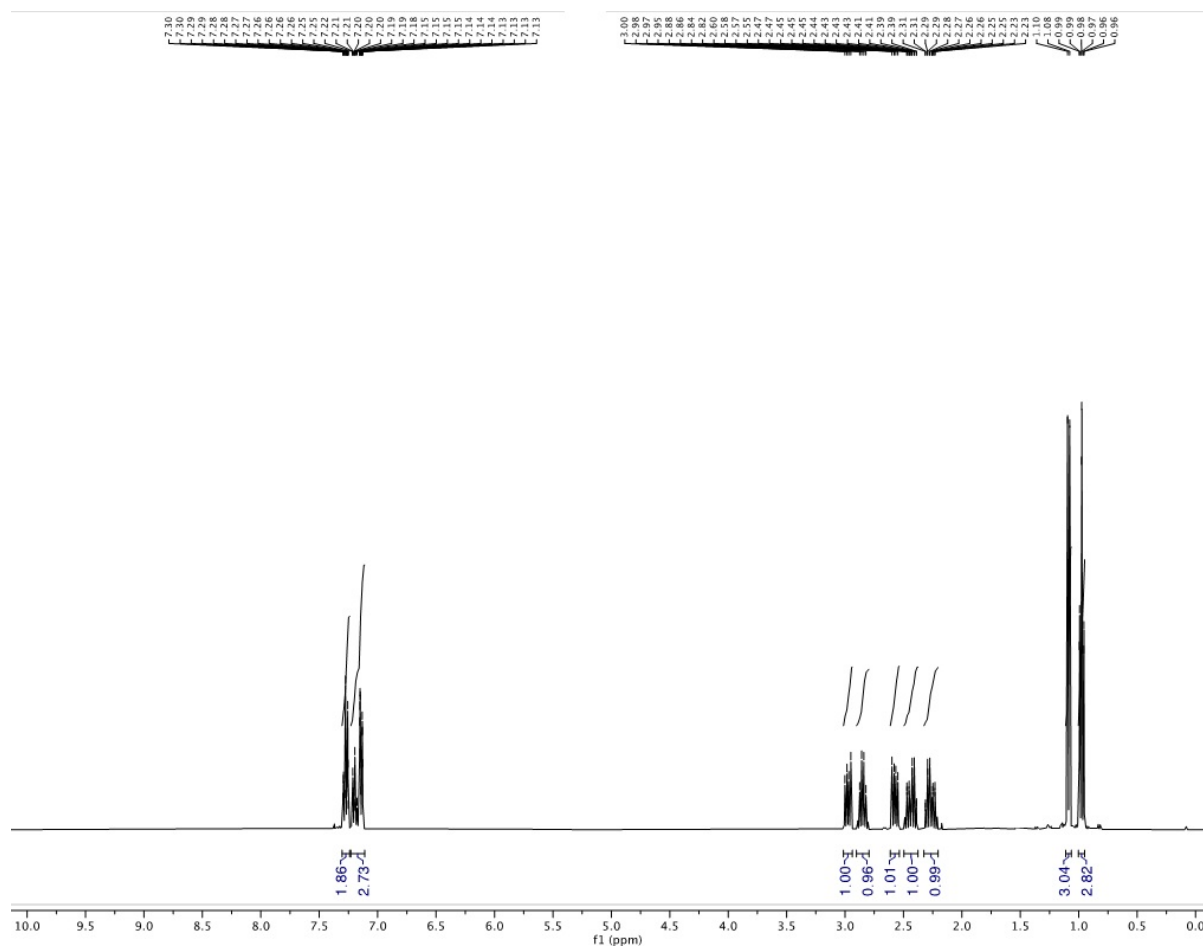

**Figure S70.**  $^1\text{H NMR}$  spectrum of 2-methyl-1-phenylpentan-3-one (from S33) in  $\text{CDCl}_3$ .

(a)

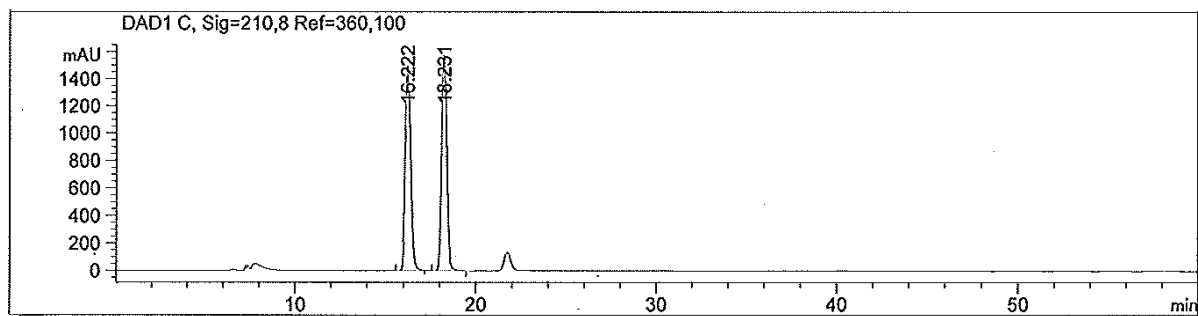

(b)

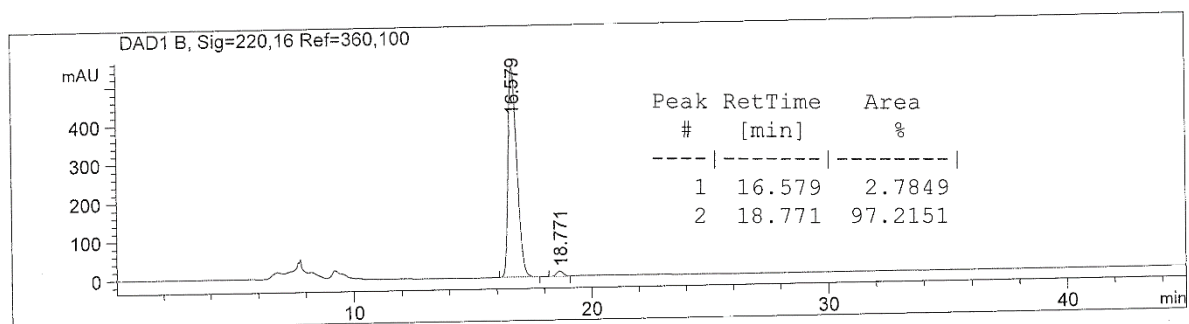

**Figure S71.** HPLC trace of enantioenriched product (94% (*S*) ee using **4a** catalytic system; Scheme

2).

**2,4-Dimethyl-1-phenylpentan-3-one (from S34).**<sup>25</sup> Enantiomeric excess determined by HPLC using

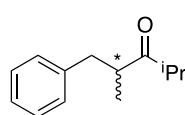

Chiracel OJ-H column (hexane/2-propanol=99/1, 0.5 mL/min, 220 nm).  $t_R$  25.8 (*S*);

$t_R$  27.2 min (*R*).  $^1\text{H NMR}$  ( $\text{CDCl}_3$ ),  $\delta$ : 0.87 (d, 3H,  $J=6.9$  Hz), 1.01 (d, 3H,  $J=6.9$  Hz),

1.08 (d, 1H,  $J=6.9$  Hz), 2.48-2.57 (m, 2H), 2.92-3.02 (m, 2H), 7.12-7.20 (m, 3H),

7.23-7.28 (m, 2H).

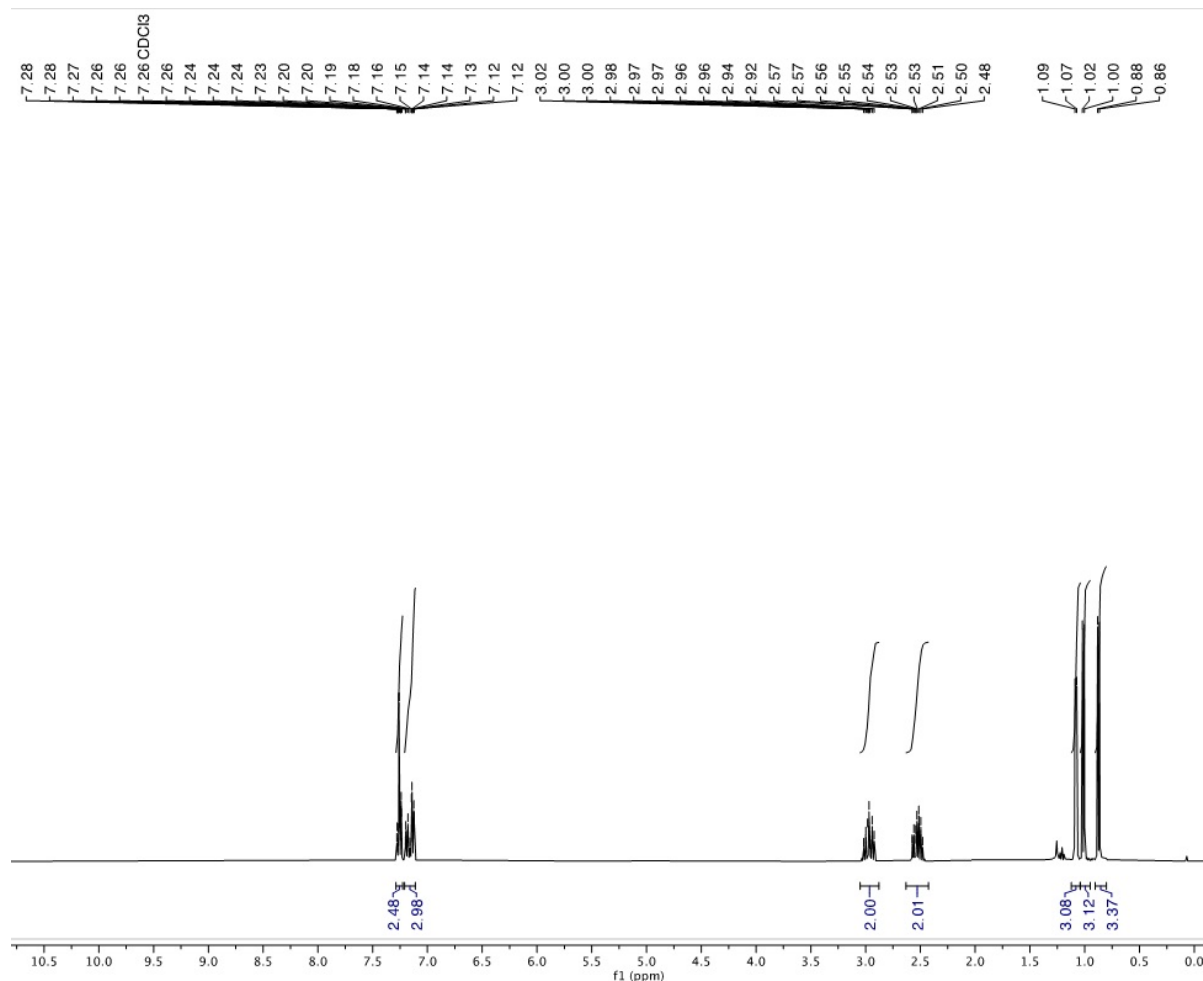

**Figure S72.**  $^1\text{H NMR}$  spectrum of 2,4-dimethyl-1-phenylpentan-3-one (from S34) in  $\text{CDCl}_3$ .

(a)

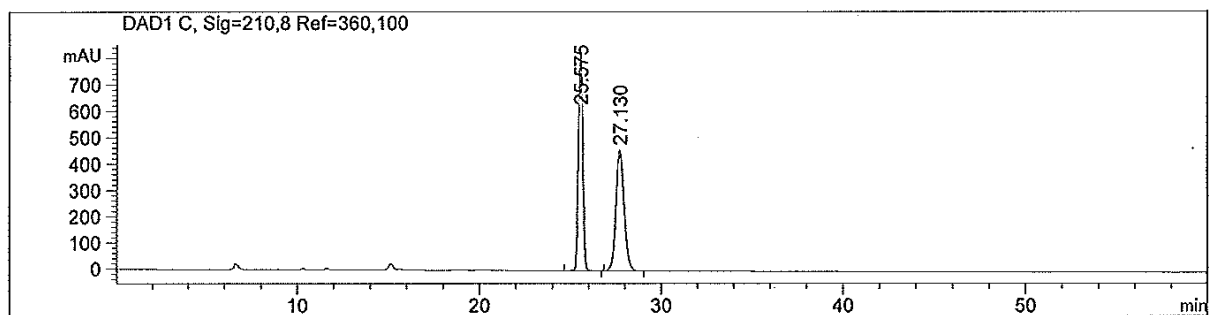

b)

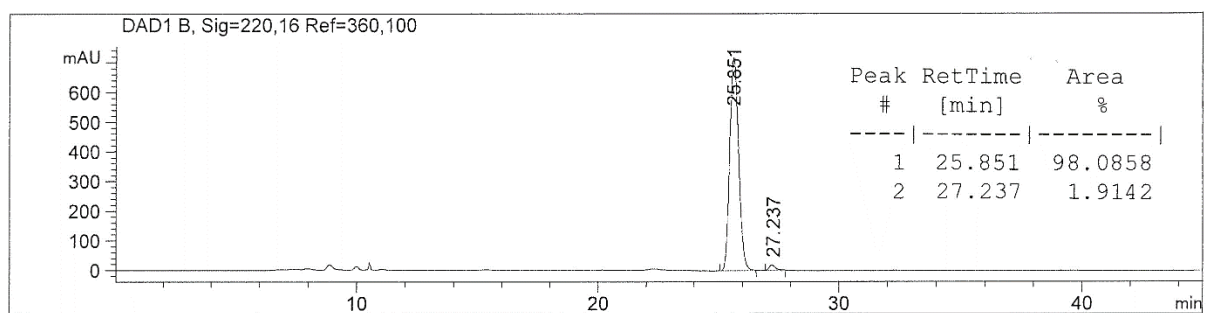

**Figure S73.** HPLC trace of enantioenriched product (96% (*S*) ee using **4a** catalytic system; Scheme 2).



**2-Methyl-1,3-diphenylpropan-1-one (from S35).**<sup>25</sup> Enantiomeric excess determined by HPLC using

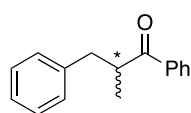

Chiralcel OB column (hexane/2-propanol=98.2, 0.5 mL/min, 220 nm).  $t_R$  16.9 min

(*S*);  $t_R$  18.1 min (*R*).  $^1\text{H NMR}$  ( $\text{CDCl}_3$ ),  $\delta$ : 1.21 (d, 3H,  $J=6.8$  Hz), 2.70 (dd, 1H,  $J=$

13.7 Hz,  $J=7.8$  Hz), 3.17 (dd, 1H,  $J=13.7$  Hz,  $J=6.3$  Hz), 3.74-3.79 (m, 1H), 7.18-

7.29 (m, 5H), 7.43-7.47 (m, 2H), 7.53-7.57 (m, 1H), 7.92-7.94 (m, 2H).

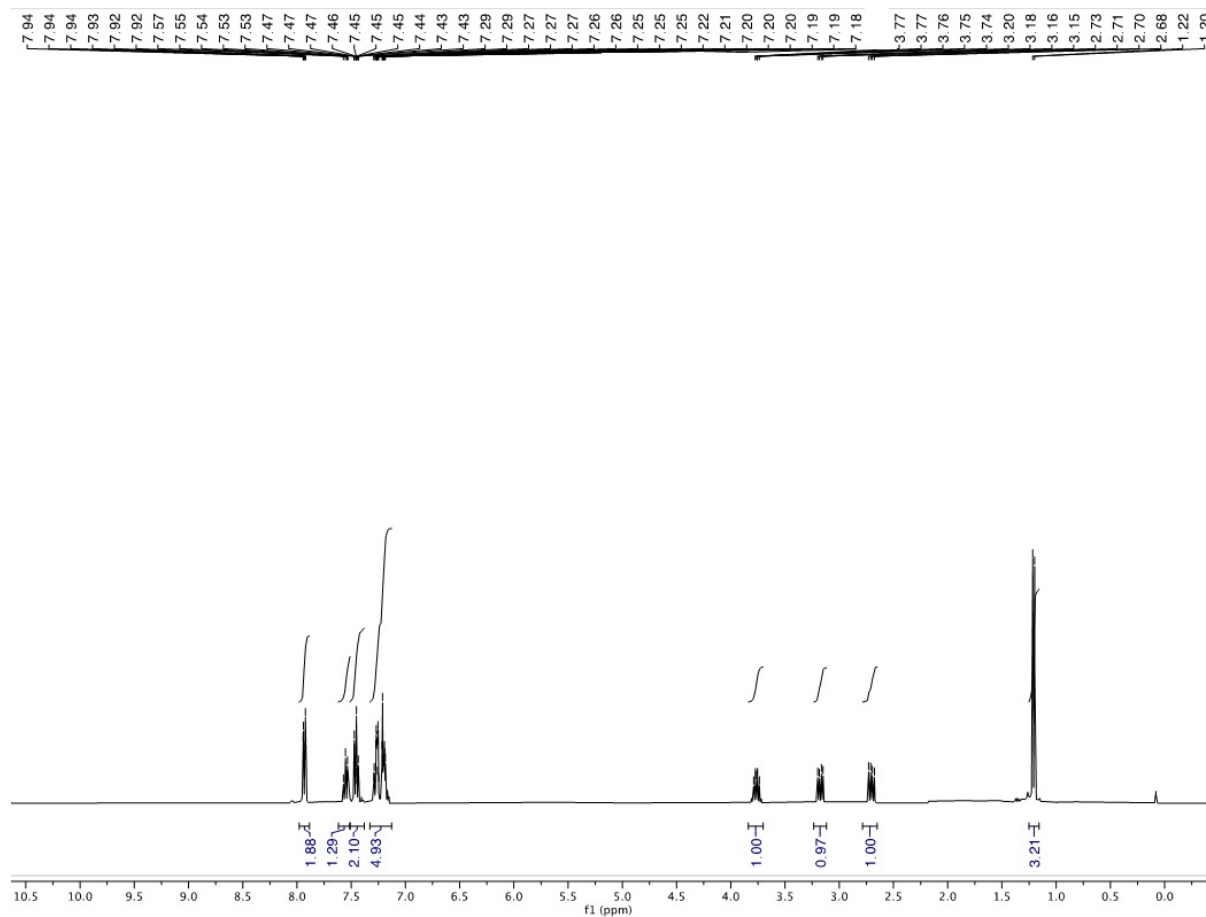

**Figure S74.**  $^1\text{H NMR}$  spectrum of 2-methyl-1,3-diphenylpropan-1-one (from S35) in  $\text{CDCl}_3$ .

(a)

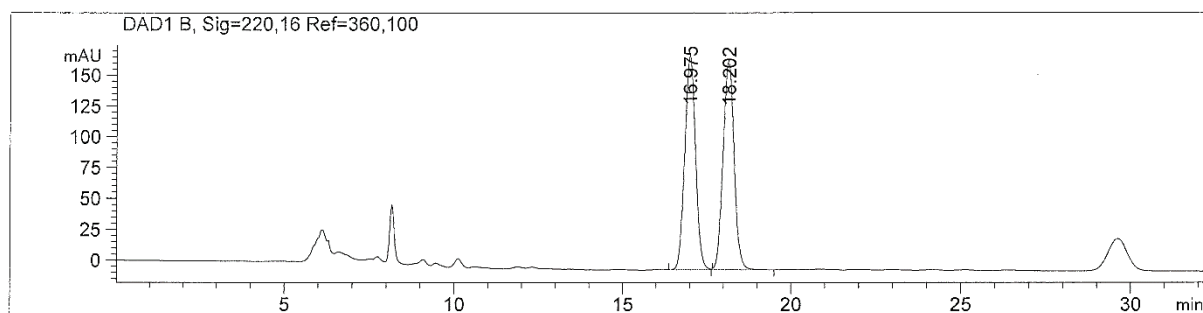

(b)

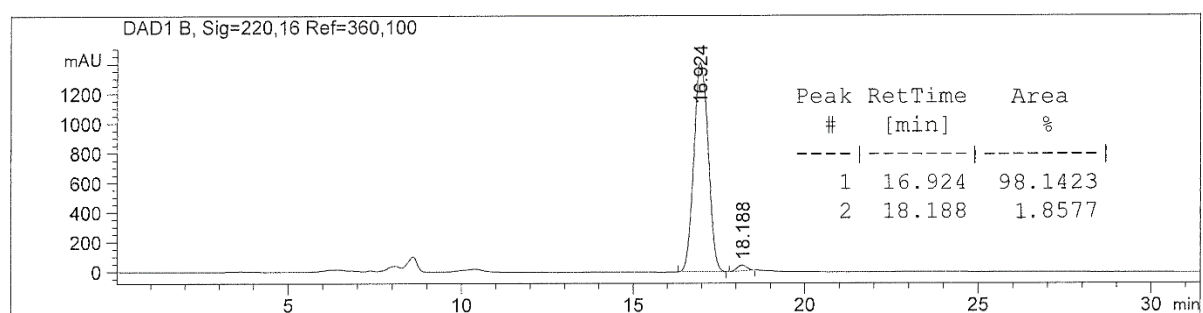

**Figure S75.** HPLC trace of (a) racemic and (b) enantioenriched product (96% (*S*) ee using **4a** catalytic system; Scheme 2).

**2-Fluoro-1,3-diphenylpropan-1-one (from S36).**<sup>26</sup> Enantiomeric excess determined by HPLC using

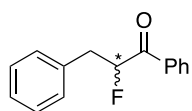

Chiralcel OJ-H column (hexane/2-propanol=90.10, 0.7 mL/min, 220 nm).  $t_R$  22.2 min

(*R*);  $t_R$  31.0 min (*S*).  $^1\text{H NMR}$  ( $\text{CDCl}_3$ ),  $\delta$ : 3.22-3.39 (m, 2H), 5.74 (ddd, 1H,  $J= 49.0$

Hz,  $J= 8.2$  Hz,  $J= 4.0$  Hz), 7.25-7.34 (m, 5H), 7.46-7.49 (m, 2H), 7.58-7.62 (m, 1H),

7.92-7.95 (m, 2H).

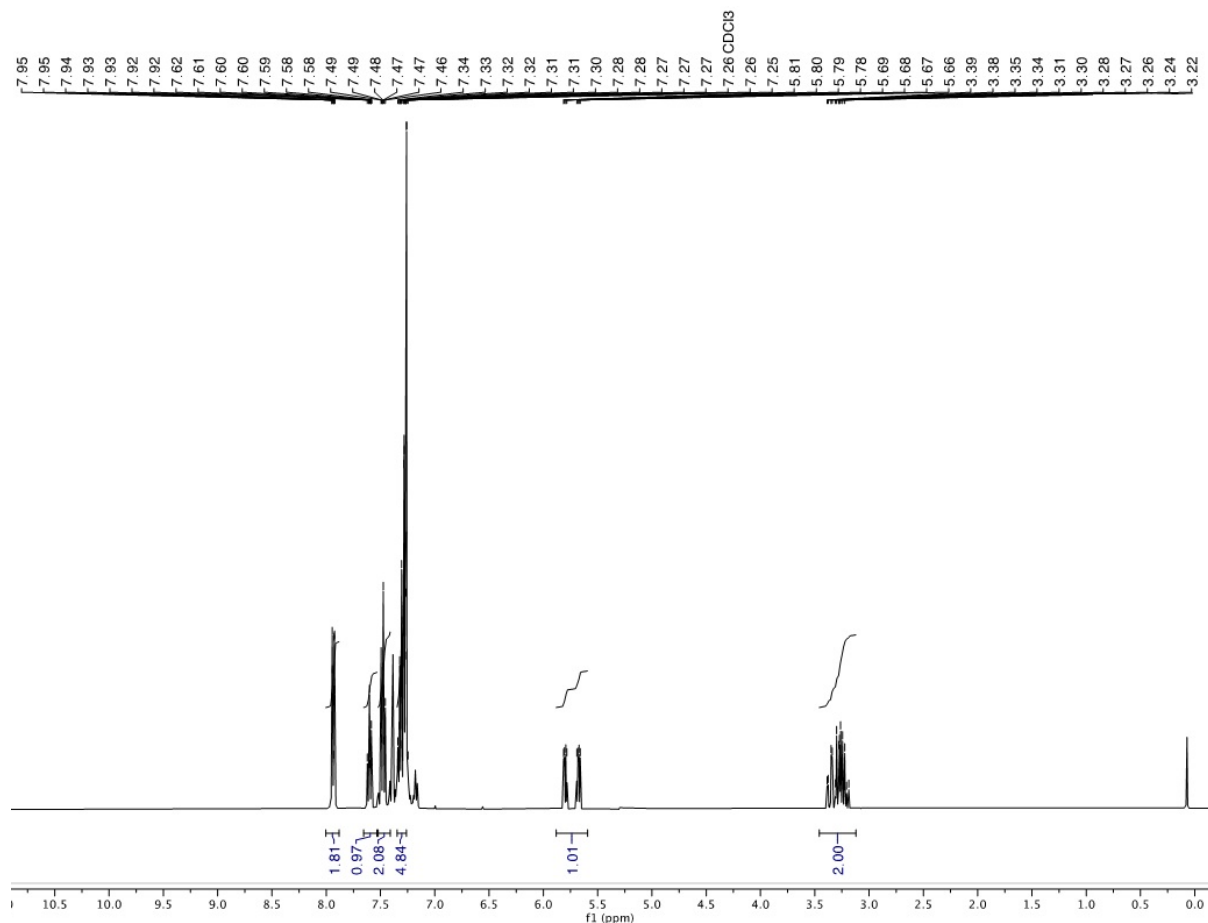

**Figure S76.**  $^1\text{H NMR}$  spectrum of 2-fluoro-1,3-diphenylpropan-1-one (from S36) in  $\text{CDCl}_3$ .

(a)

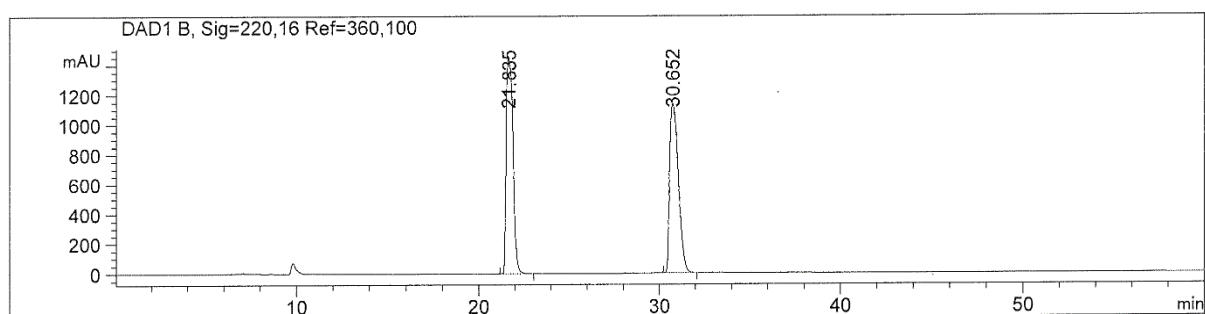

(b)

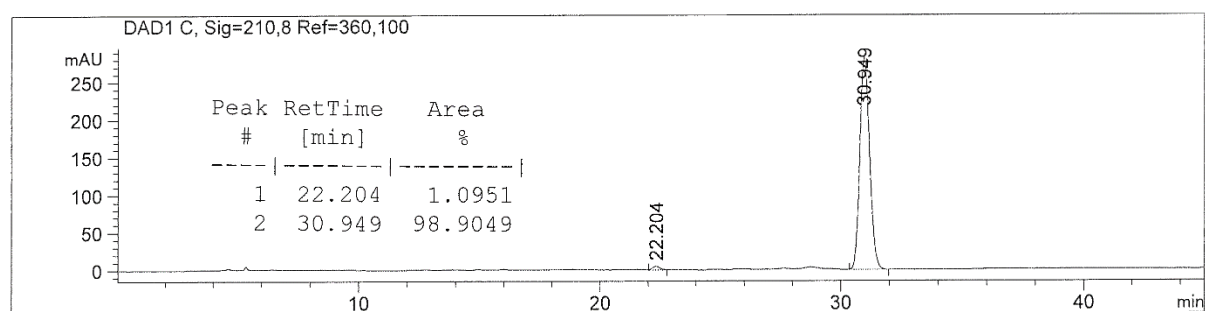

**Figure S77.** HPLC trace of: (a) racemic and (b) enantioenriched product (98% (*S*) ee using **4a** catalytic system; Scheme 2).

**1,3-Diphenylbutan-1-one (from S37).**<sup>27</sup> Enantiomeric excess determined by HPLC using a Chiralcel OJ-H column (hexane/2-propanol = 97/3, 0.5 mL/min, 220 nm).  $t_R$  26.7 min (*R*);  $t_R$  30.9 min (*S*).  $^1\text{H NMR}$  ( $\text{CDCl}_3$ ),  $\delta$ : 1.27 (d, 3H,  $J=6.7$  Hz), 3.08-3.14 (m, 1H), 3.20-3.26 (m, 1H), 3.39-3.46 (m, 1H), 7.12-7.24 (m, 5H), 7.35-7.39 (m, 2H), 7.46-7.40 (m, 1H), 7.84-7.86 (m, 2H).

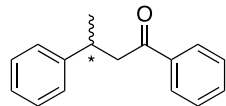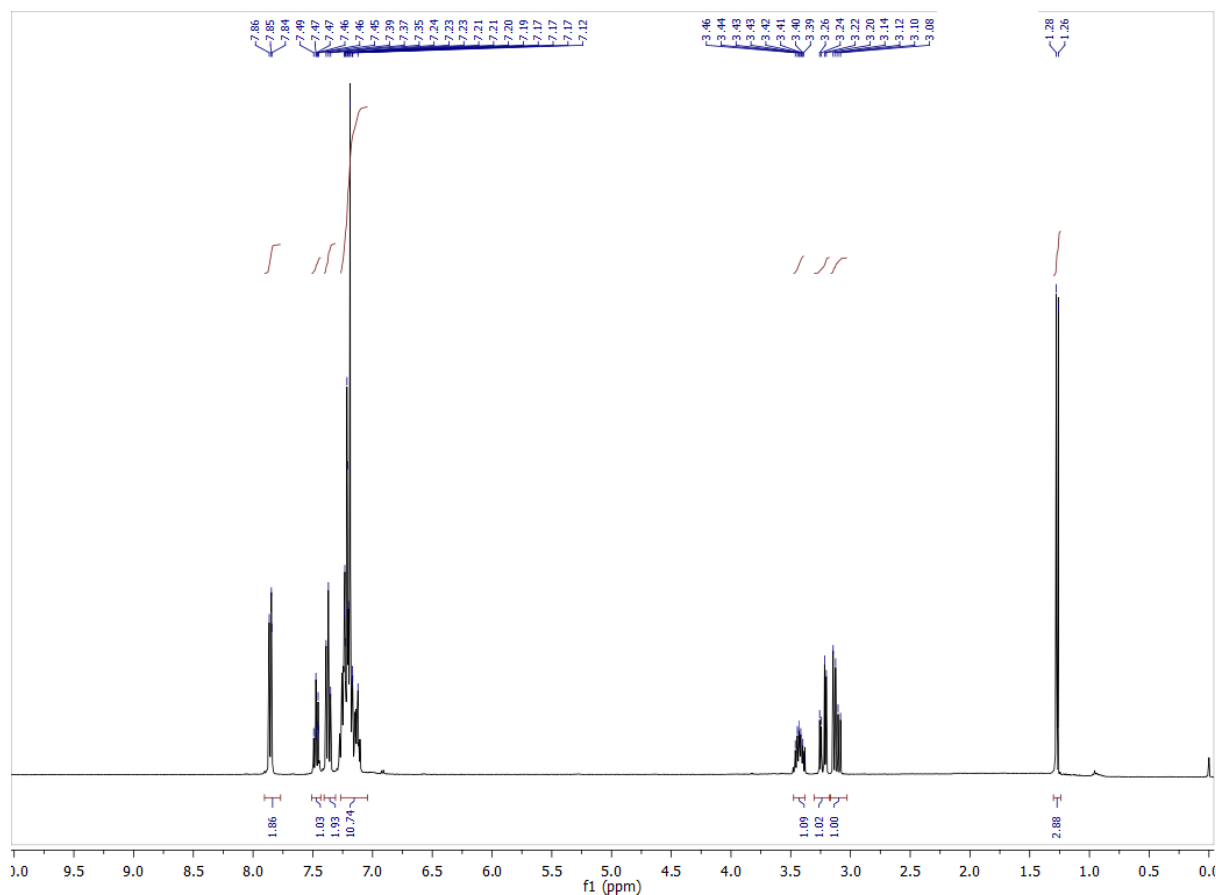

**Figure S78.**  $^1\text{H NMR}$  spectrum of 1,3-diphenylbutan-1-one (from S37) in  $\text{CDCl}_3$ .

(a)

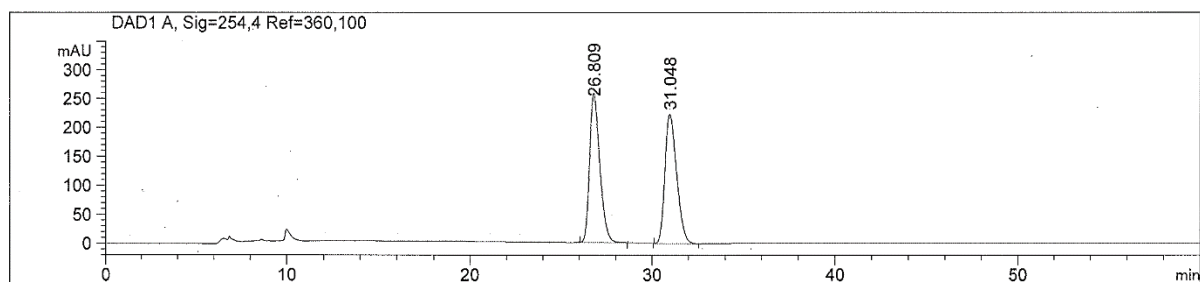

(b)

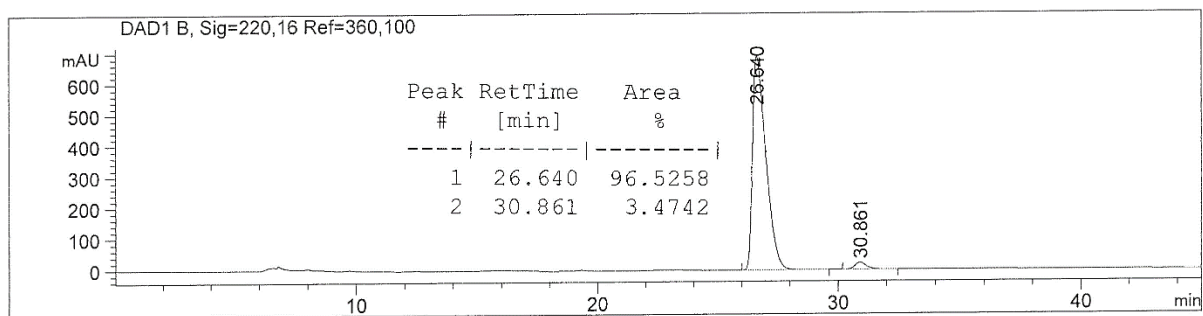

**Figure S79.** HPLC trace of: (a) racemic and (b) enantioenriched product (92% (*R*) ee using **4a** catalytic system; Scheme 2).

**4-Methyl-1,3-diphenylpentan-1-one (from S38).**<sup>27</sup> Enantiomeric excess determined by HPLC using a

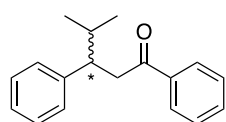

Chiracel AD column (hexane/2-propanol = 97/3, 0.5 mL/min, 220 nm).  $t_R$  16.7 min (+);  $t_R$  19.7 min (-).  $^1\text{H NMR}$  ( $\text{CDCl}_3$ ),  $\delta$ : 0.78 (d, 3H,  $J=6.9$  Hz), 0.97 (d, 3H,  $J=6.6$  Hz), 1.91-1.97 (m, 1H), 3.15-3.19 (m, 1H), 3.35-3.37 (m, 2H), 7.15-7.26 (m, 5H), 7.40-7.44 (m, 2H), 7.50-7.52 (m, 1H), 7.86-7.88 (m, 2H).

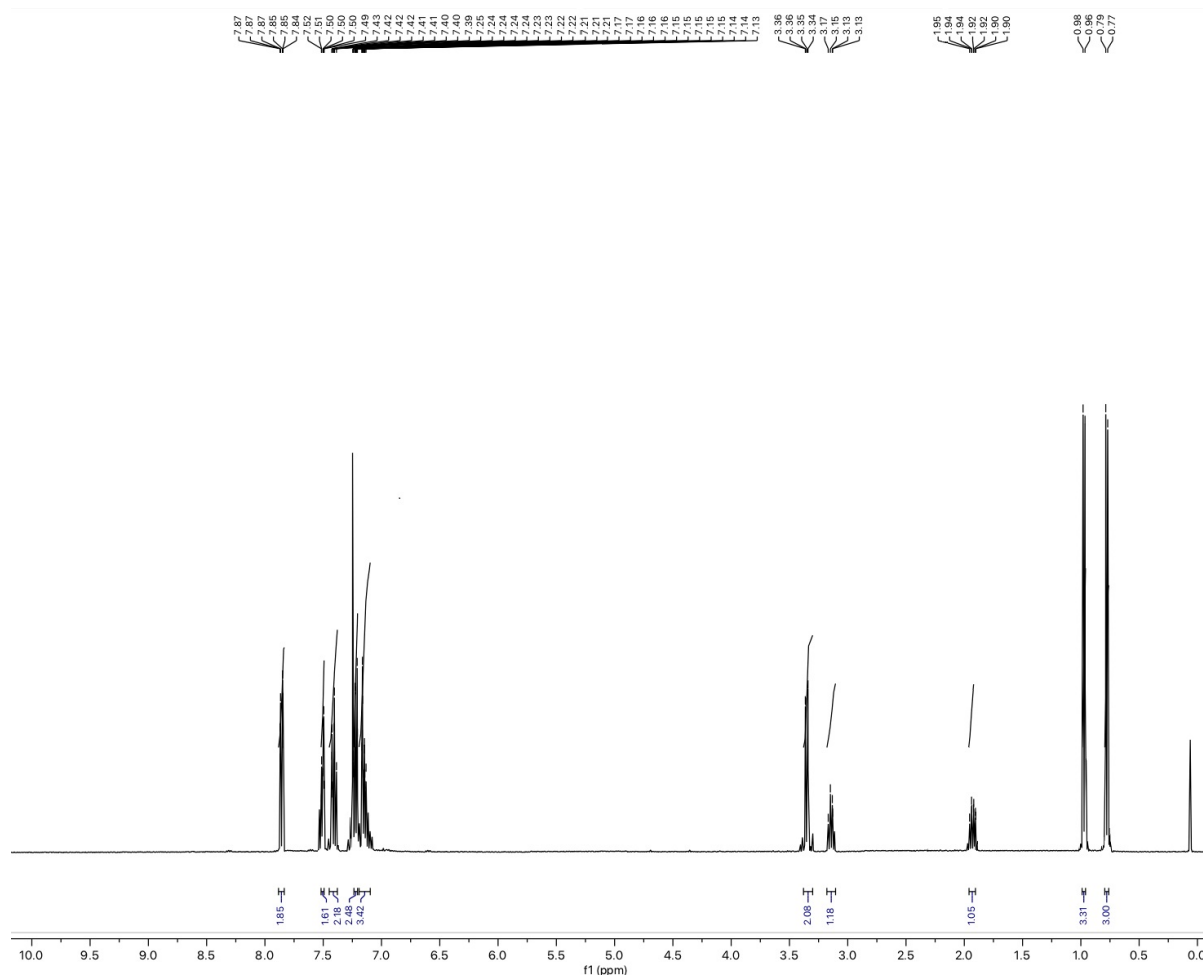

**Figure S80.**  $^1\text{H NMR}$  spectrum of 4-methyl-1,3-diphenylpentan-1-one (from S38) in  $\text{CDCl}_3$ .

(a)

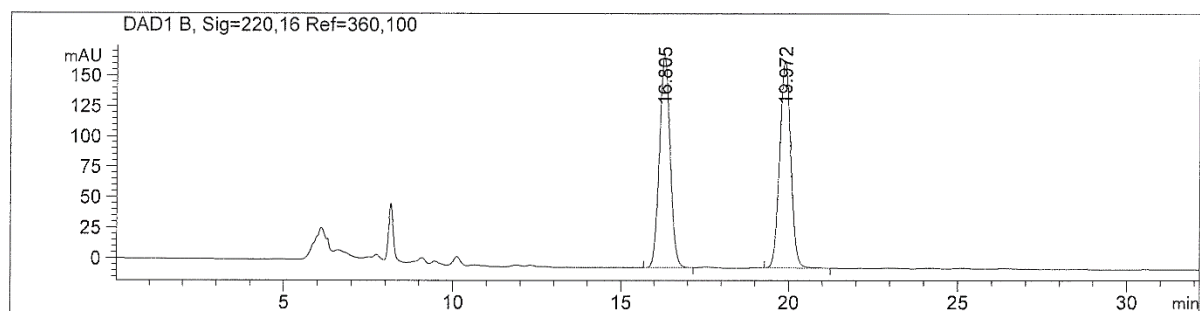

(b)

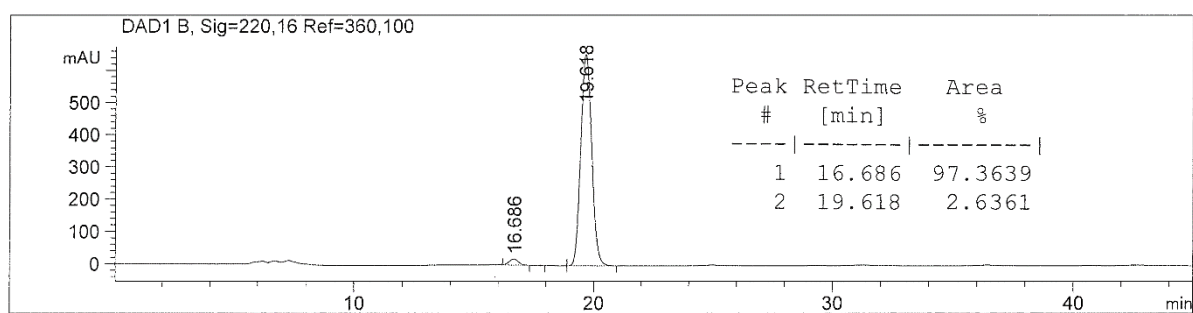

**Figure S81.** HPLC trace of: (a) racemic and (b) enantioenriched product (95% (*S*) ee using **4a** catalytic system; Scheme 2).



**2-(1,2-Diphenylethyl)-4,4,5,5-tetramethyl-1,3,2-dioxaborolane (from S39).**<sup>28</sup> Enantiomeric excess

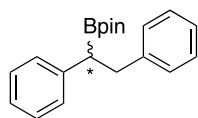

determined by HPLC using Chiralcel OJ-H column (hexane/2-propanol=99/1, 0.5 mL/min, 254 nm).  $t_R$  9.5 min (-);  $t_R$  13.1 min (+).  $^1H$  NMR ( $CDCl_3$ ),  $\delta$ : 1.12 (s, 6H), 1.13 (s, 6H), 2.71 (dd, 1H,  $J=6.8$  Hz,  $J=10.0$  Hz), 2.98 (dd, 1H,  $J=7.0$  Hz,  $J=13.6$  Hz), 3.17 (dd, 1H,  $J=9.6$  Hz,  $J=13.6$  Hz), 7.14-7.29 (m, 10H).

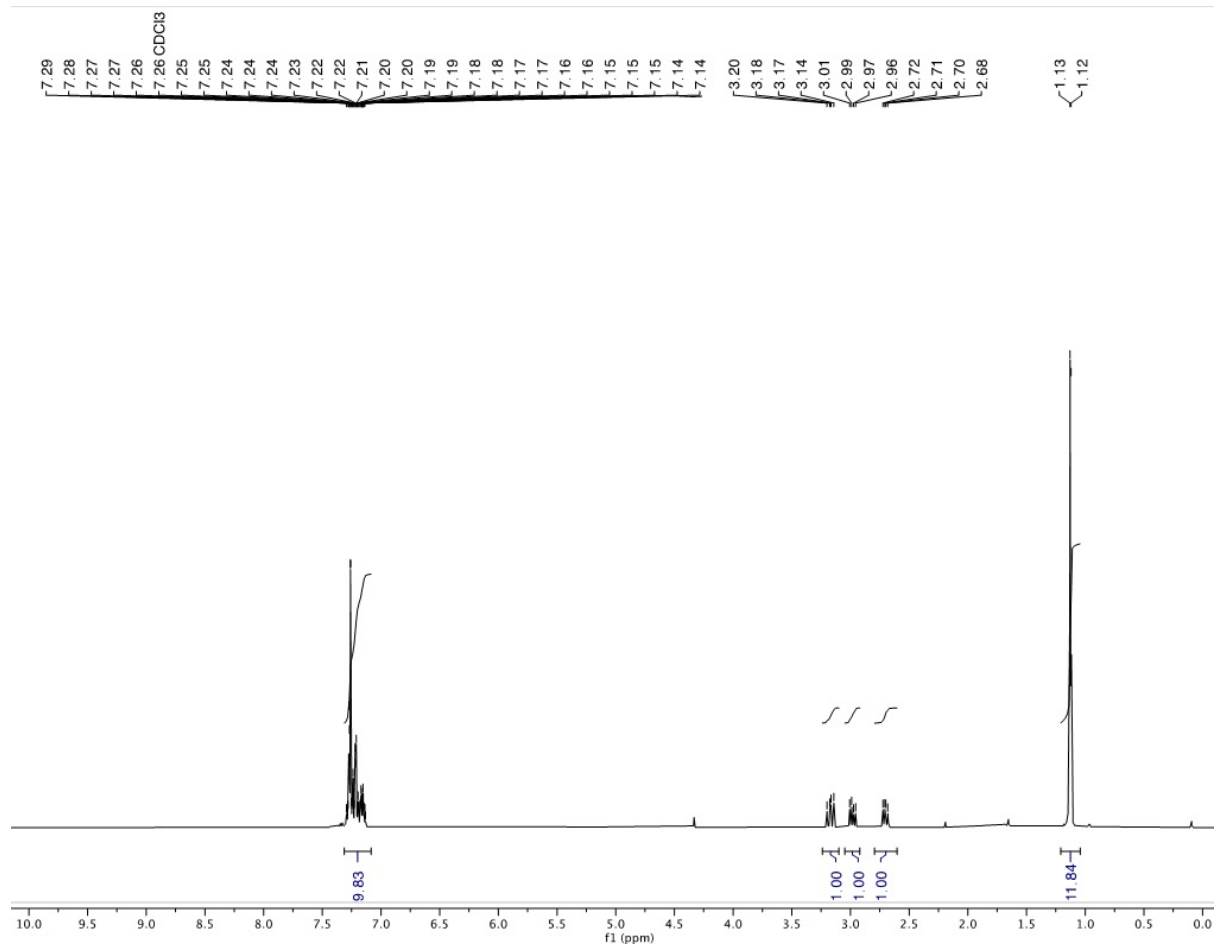

**Figure S82.**  $^1H$  NMR spectrum of 2-(1,2-diphenylethyl)-4,4,5,5-tetramethyl-1,3,2-dioxaborolane (from S39) in  $CDCl_3$ .

(a)

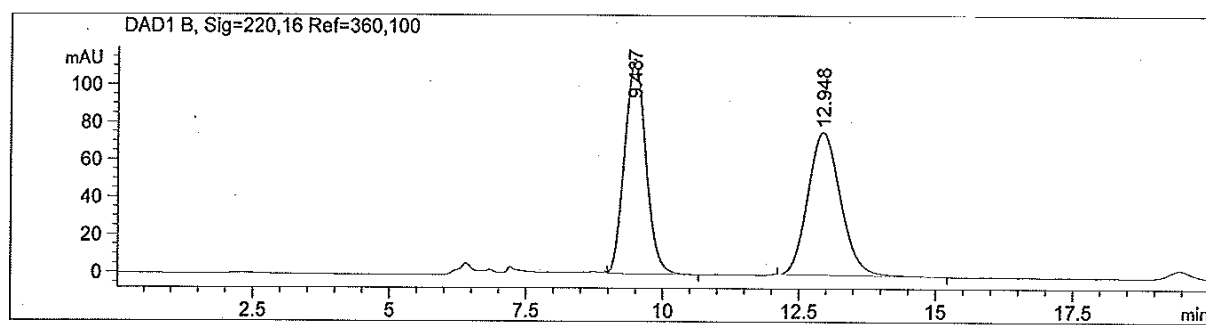

(b)

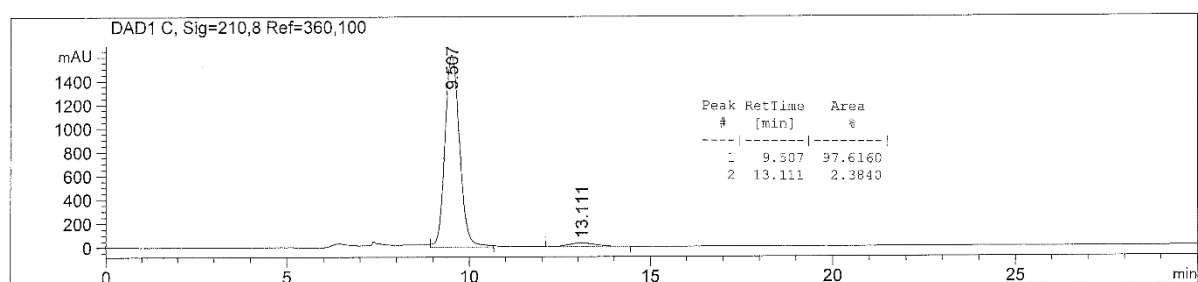

**Figure S83.** HPLC trace of: (a) racemic and (b) enantioenriched product (95% (-) ee using **4b** catalytic system; Scheme 3).

**2-(1-Phenylethyl)-4,4,5,5-tetramethyl-1,3,2-dioxaborolane (from S40).**<sup>28</sup> Enantiomeric excess were

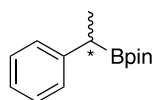

determined after oxidation of the pinacolborane derivative to the corresponding alcohol using sodium perborate monohydrate (75 mg, 0.75 mmol) in a THF/H<sub>2</sub>O solution (1:1, 4 mL). Enantiomeric excess determined by GC using Chiralsil-Dex CB column (80 kPa H<sub>2</sub>, 110 °C for 15 min, 10 °C/min, to 180 °C). *t<sub>R</sub>* 3.6 min (*R*); *t<sub>R</sub>* 3.8 min (*S*). <sup>1</sup>H NMR (CDCl<sub>3</sub>), δ: 1.20 (s, 6H), 1.21 (s, 6H), 1.33 (d, 3H, *J*= 7.5 Hz), 2.43 (q, 1H, *J*= 7.5 Hz), 7.11-7.15 (m, 1H), 7.20-7.28 (m, 4H).

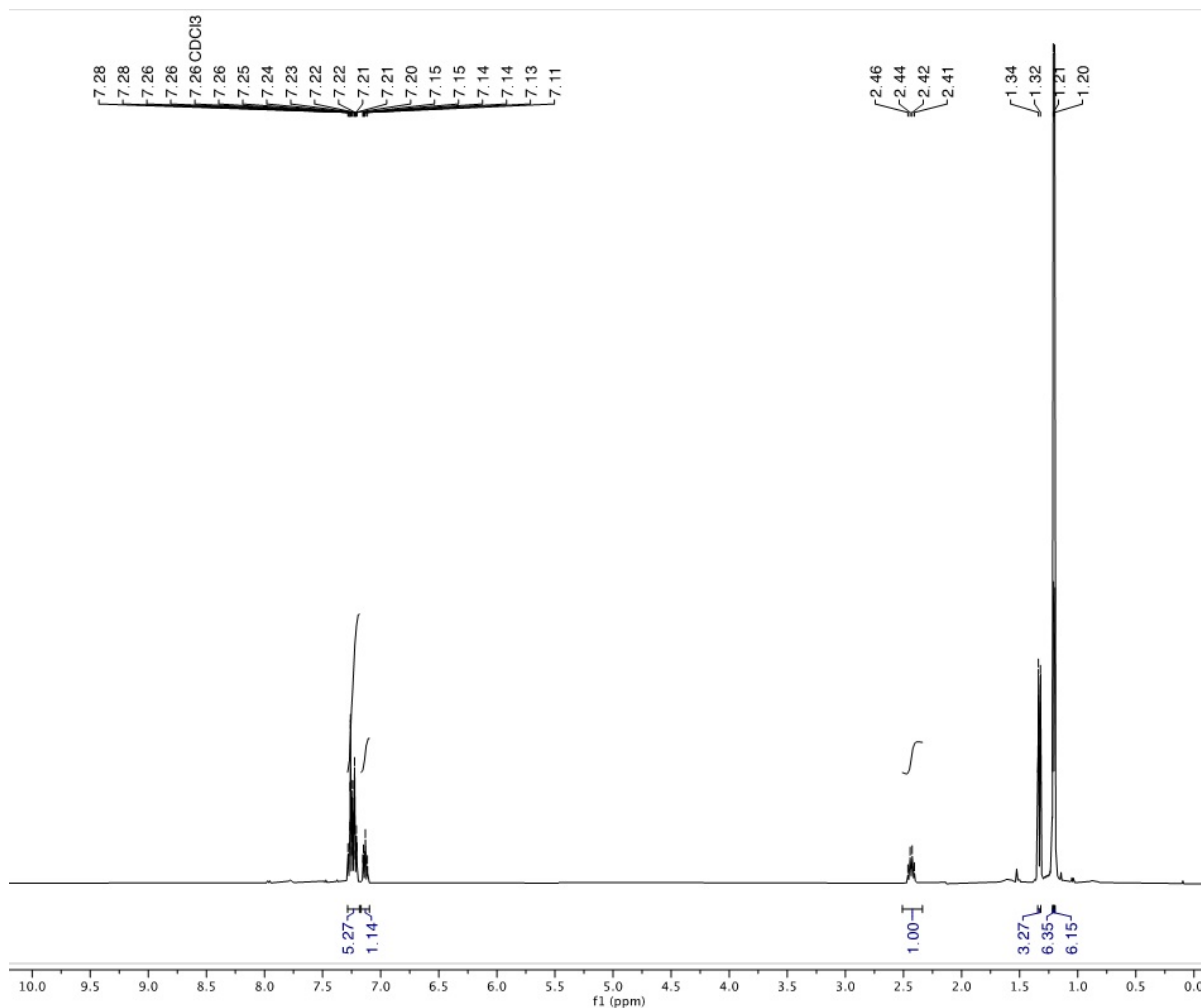

**Figure S84.** <sup>1</sup>H NMR spectrum of 2-(1-phenylethyl)-4,4,5,5-tetramethyl-1,3,2-dioxaborolane (from S40) in CDCl<sub>3</sub>.

(a)

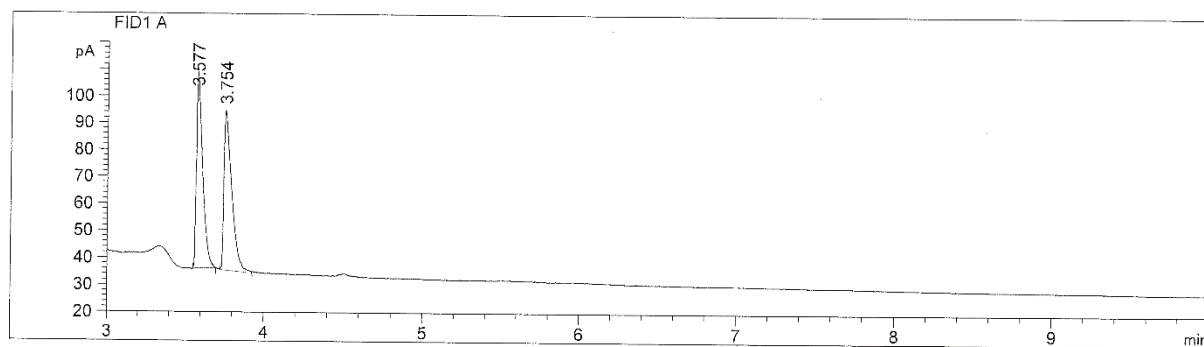

(b)

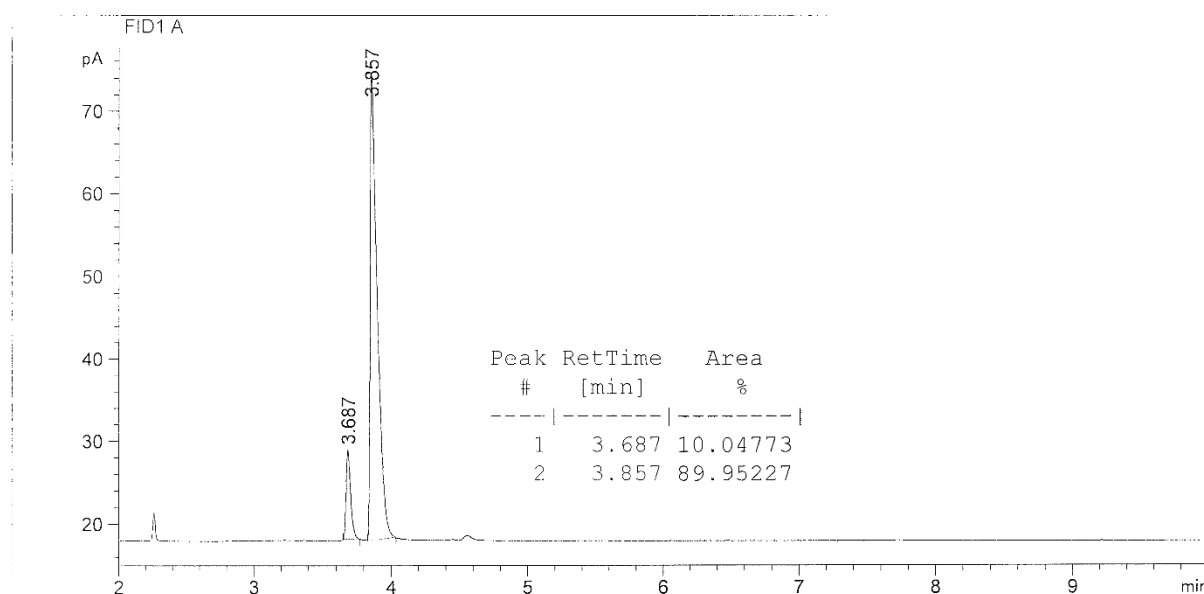

**Figure S85.** GC trace of (a) racemic and (b) enantioenriched product (80% (*S*) ee using **4b** catalytic system; Scheme 3).

**2-(1-Cyclohexylethyl)-4,4,5,5-tetramethyl-1,3,2-dioxaborolane (from S41).**<sup>28</sup> Enantiomeric excess

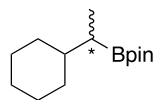

were determined after oxidation/acetylation of the pinacolborane derivative to the corresponding trifluoroacetylated compound using sodium perborate monohydrate (75 mg, 0.75 mmol) in a THF/H<sub>2</sub>O solution (1:1, 4 mL). After 1 h, the reaction mixture was extracted with DCM (3×1 mL), dried with MgSO<sub>4</sub> and filtrated. To the filtrate acetic anhydride (240 μL, 2.5 mmol), NEt<sub>3</sub> (700 μL, 5 mmol) and a pinch of DMAP (c.a. 1 mg) was added. After 12 h, the volatiles were removed under vacuum. Enantiomeric excess determined by GC using HP CHIRAL 20B column (1.5 mL/min H<sub>2</sub>, 50 °C, 1 oC/min to 230 °C). t<sub>R</sub> 49.8 min (*S*); t<sub>R</sub> 52.5 min (*R*). <sup>1</sup>H NMR (CDCl<sub>3</sub>), δ: 1.24 (bs, 12H), 0.87-1.26 (b, 10H), 1.52-1.72 (m, 5H).

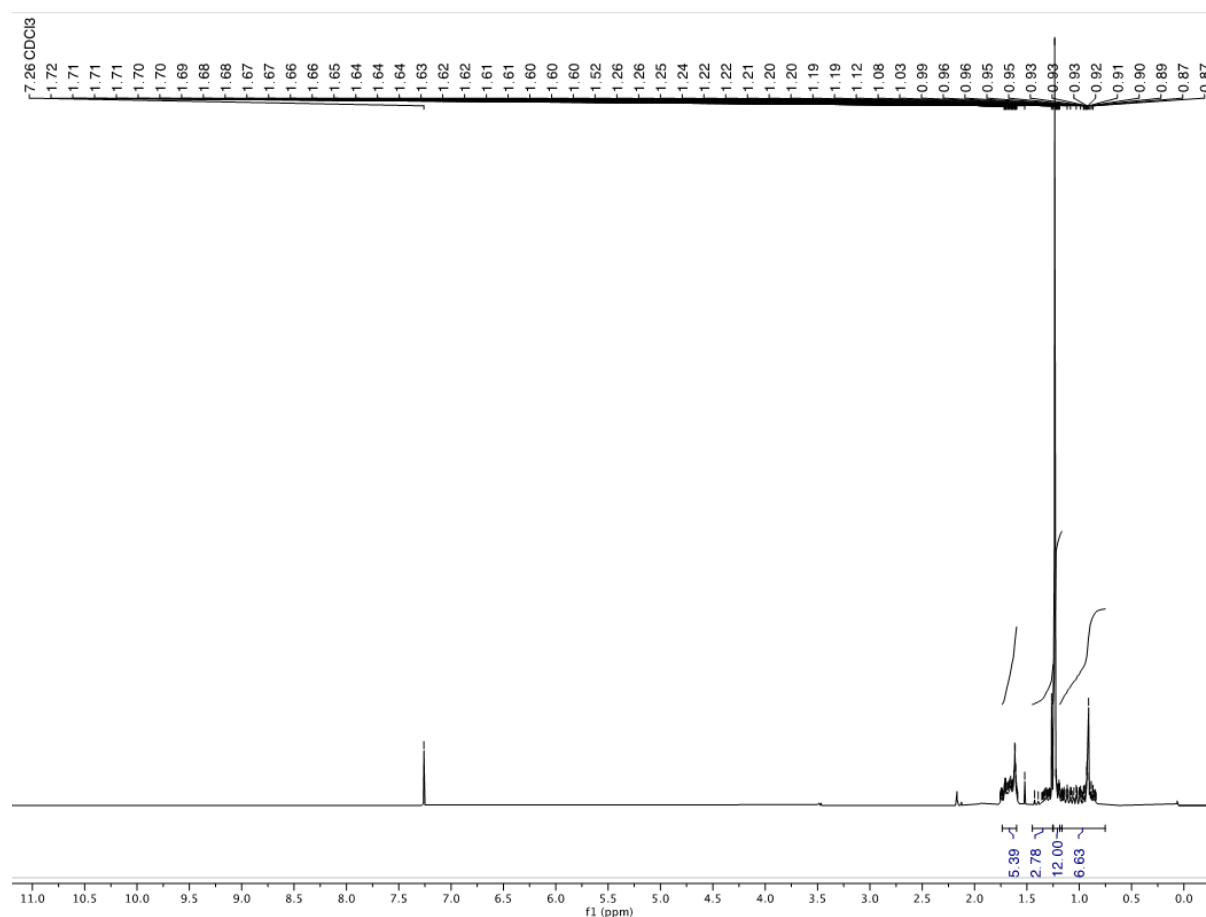

**Figure S86.** <sup>1</sup>H NMR spectrum of 2-(1-cyclohexylethyl)-4,4,5,5-tetramethyl-1,3,2-dioxaborolane (from S41) in CDCl<sub>3</sub>.

(a)

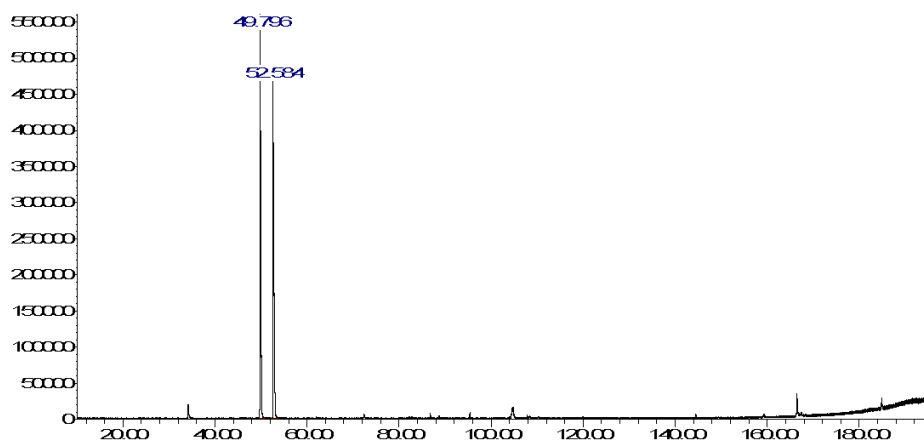

b)

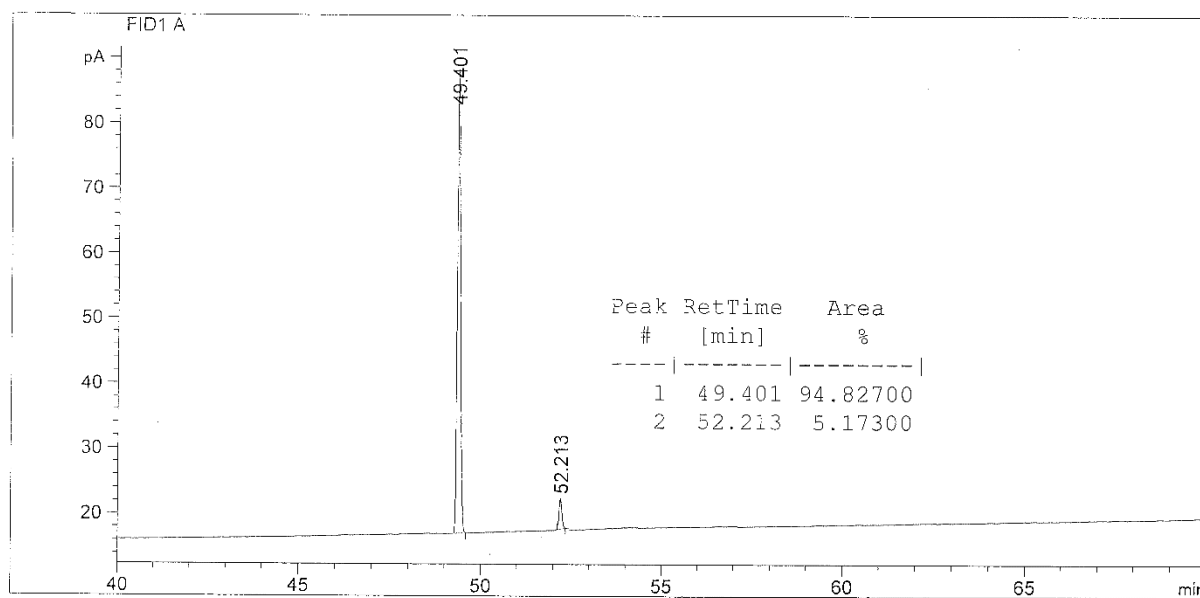

**Figure S87.** GC trace of: (a) racemic and (b) enantioenriched product (89% (*S*) ee using **4b** catalytic system; Scheme 3).

**Ethyl 3-((diphenylphosphoryl)oxy)-3-phenylpropanoate (from S42).**<sup>29</sup> Enantiomeric excess determined by HPLC using Chiralcel OD-H (hexane/2-propanol=90/10, 0.5 mL/min, 220 nm).  $t_R$  29.7 min (*R*);  $t_R$  33.6 min (*S*).  $^1\text{H}$  NMR ( $\text{CDCl}_3$ ),  $\delta$ : 1.05 (t, 3H,  $J=7.2$  Hz), 2.84 (dd, 1H,  $J=7.1$  Hz,  $J=15.2$  Hz), 3.16 (dd, 1H,  $J=7.1$  Hz,  $J=15.2$  Hz), 3.86-3.98 (m, 2H), 5.67-5.73 (m, 1H), 7.17-7.23 (m, 7H), 7.35-7.39 (m, 4H), 7.45-7.54 (m, 2H), 7.69-7.74 (m, 2H).

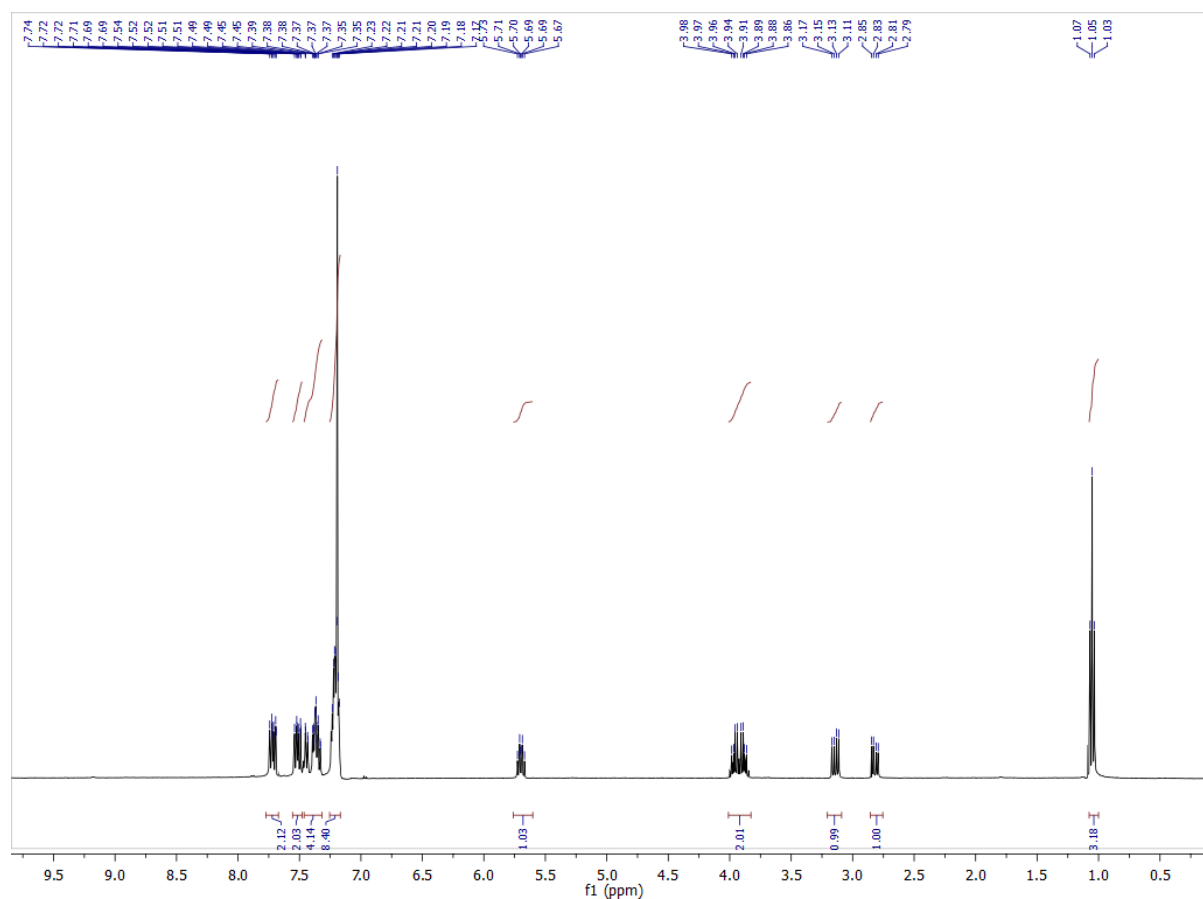

**Figure S88.**  $^1\text{H}$  NMR spectrum of ethyl 3-((diphenylphosphoryl)oxy)-3-phenylpropanoate (from S42) in  $\text{CDCl}_3$ .

(a)

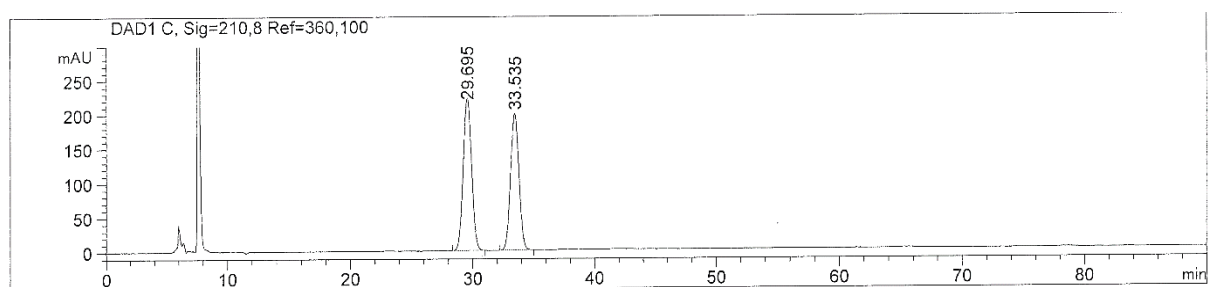

(b)

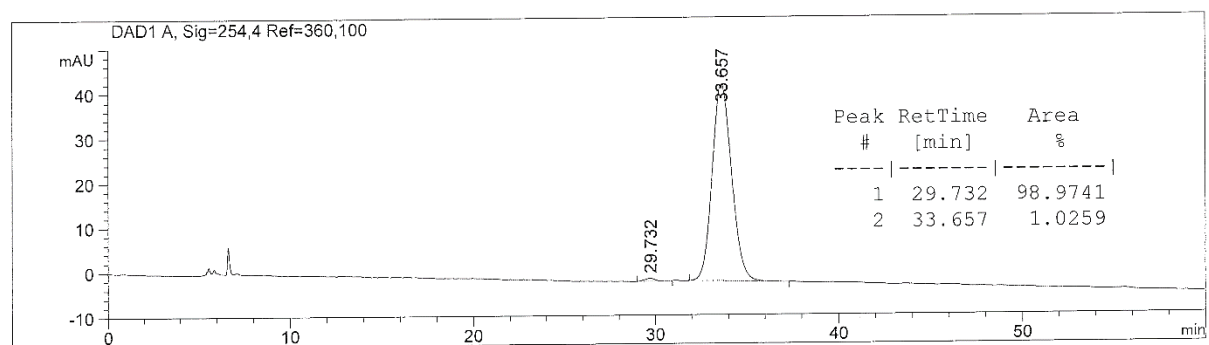

**Figure S89.** HPLC trace of: (a) racemic and (b) enantioenriched product (98% (*S*) ee using **4a** catalytic system; Scheme 3).



**Ethyl 3-((diphenylphosphoryl)oxy)-3-(4-(trifluoromethyl)phenyl)propanoate (from S43).**<sup>29</sup>

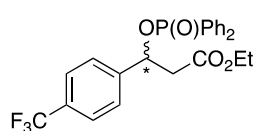

Enantiomeric excess determined by HPLC using Chiralcel OD-H (hexane/2-propanol=90/10, 0.5 mL/min, 220 nm).  $t_R$  17.5 min (*R*);  $t_R$  26.6 min (*S*).  $^1\text{H}$  NMR ( $\text{CDCl}_3$ ),  $\delta$ : 1.13 (t, 3H,  $J=7.2$  Hz), 2.89 (dd, 1H,  $J=6.4$  Hz,  $J=15.6$  Hz), 3.20 (dd, 1H,  $J=6.4$  Hz,  $J=15.6$  Hz), 3.94-4.06 (m, 2H), 5.78-5.84 (m, 1H), 7.29-7.80 (m, 14H).

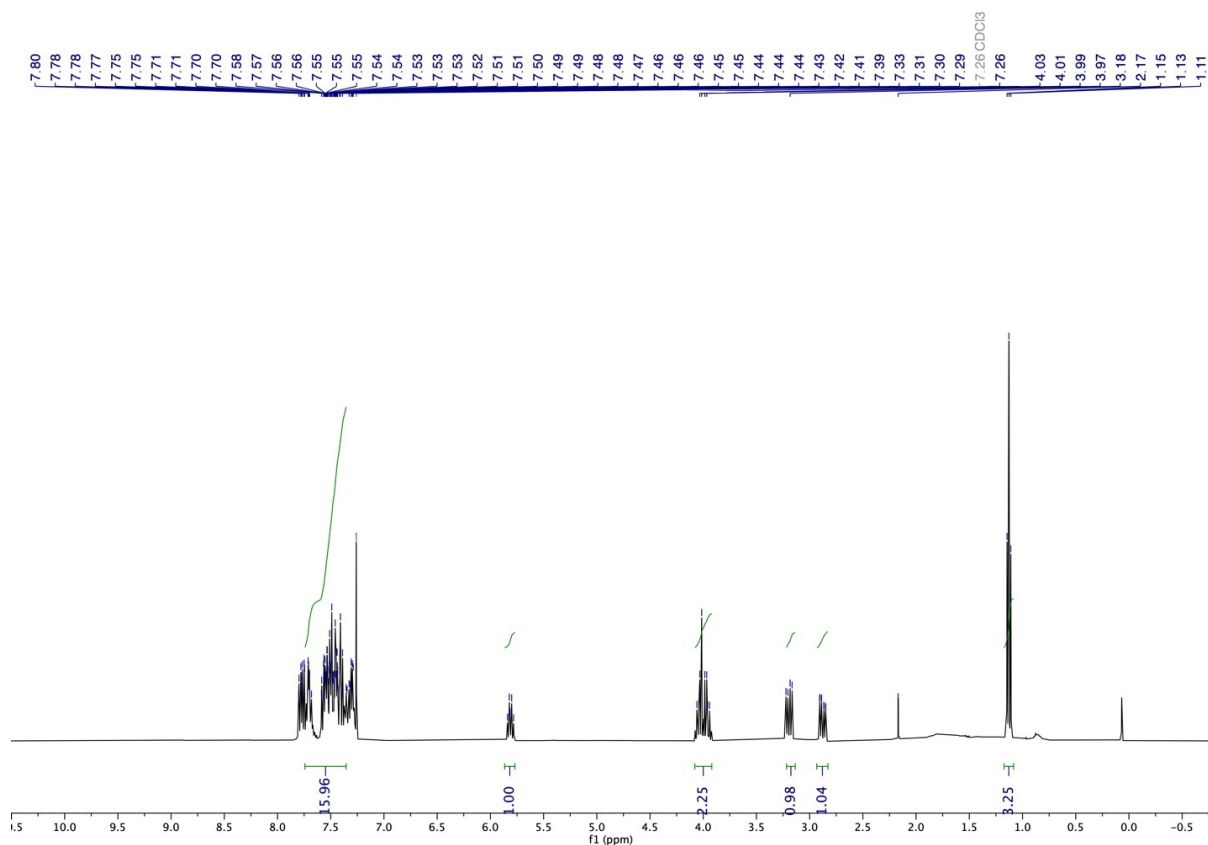

**Figure S90.**  $^1\text{H}$  NMR spectrum of ethyl 3-((diphenylphosphoryl)oxy)-3-(4-(trifluoromethyl)phenyl)propanoate (from S43) in  $\text{CDCl}_3$ .

(a)

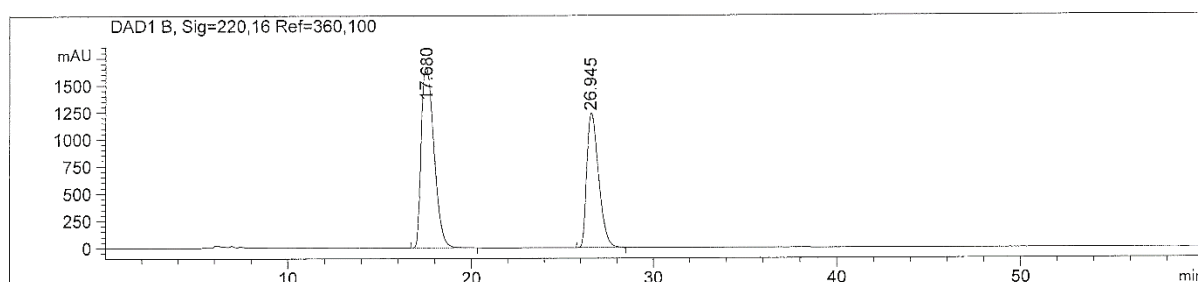

(b)

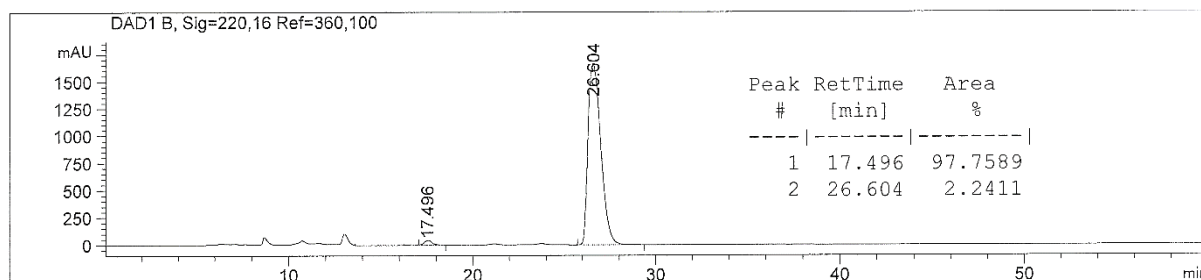

**Figure S91.** HPLC trace of: (a) racemic and (b) enantioenriched product (95% (*S*) ee using **4a** catalytic system; Scheme 3).

**Ethyl 3-((diphenylphosphoryl)oxy)-3-(4-(trifluoromethyl)phenyl)propanoate (from S44).**<sup>29</sup>

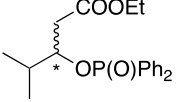 Enantiomeric excess determined by HPLC using Chiralcel OD-H (hexane/2-propanol=90/10, 0.5 mL/min, 220 nm).  $t_R$  17.5 min (*R*);  $t_R$  26.5 min (*S*).  $^1\text{H NMR}$  ( $\text{CDCl}_3$ ),  $\delta$ : 0.91 (t, 6H,  $J=7.1$  Hz), 1.14 (t, 3H,  $J=7.2$  Hz), 2.02-2.11 (m, 1H), 2.55 (dd, 1H,  $J=5.0$  Hz,  $J=15.6$  Hz), 2.75 (dd, 1H,  $J=7.4$  Hz,  $J=15.5$  Hz), 3.88-4.00 (m, 2H), 4.74 (br, 1H), 7.40-7.81 (m, 10H).

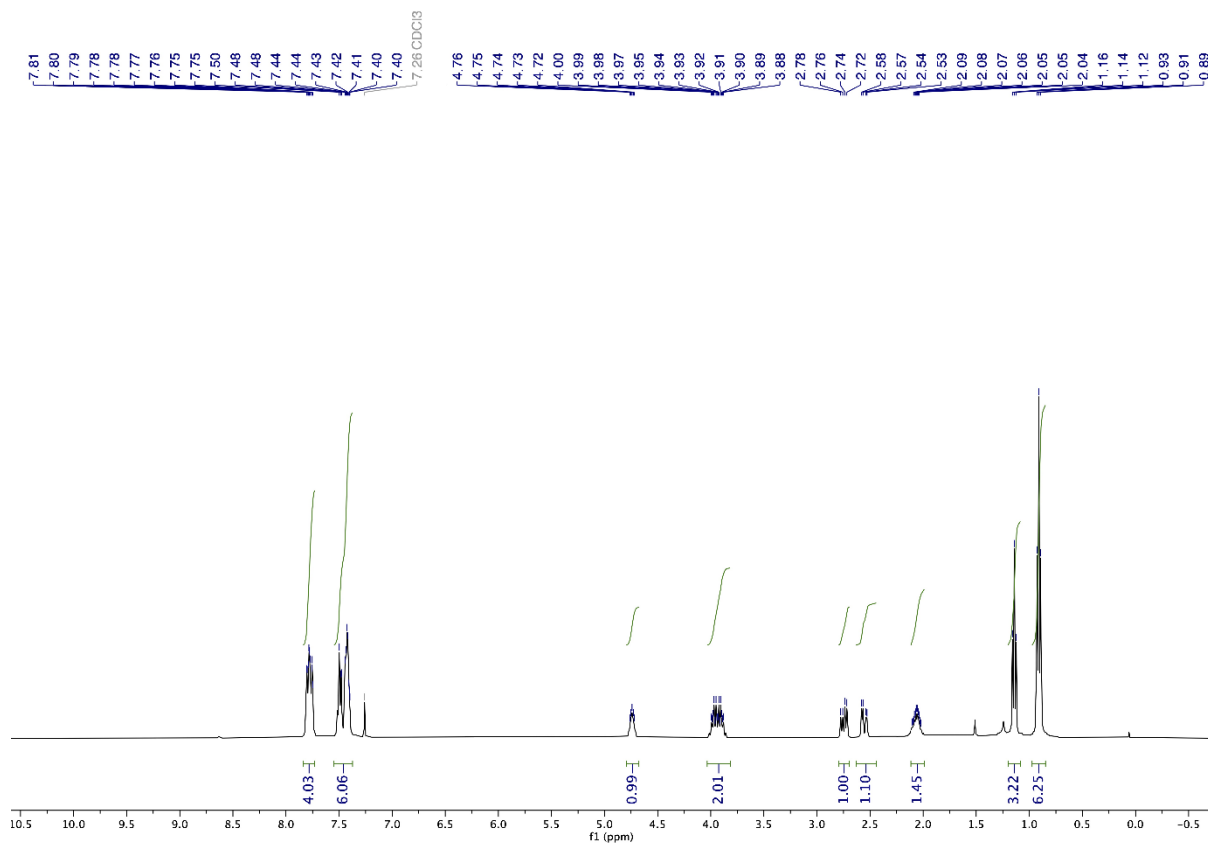

**Figure S92.**  $^1\text{H NMR}$  spectrum of ethyl 3-((diphenylphosphoryl)oxy)-3-(4-(trifluoromethyl)phenyl)propanoate (from S44) in  $\text{CDCl}_3$ .

(a)

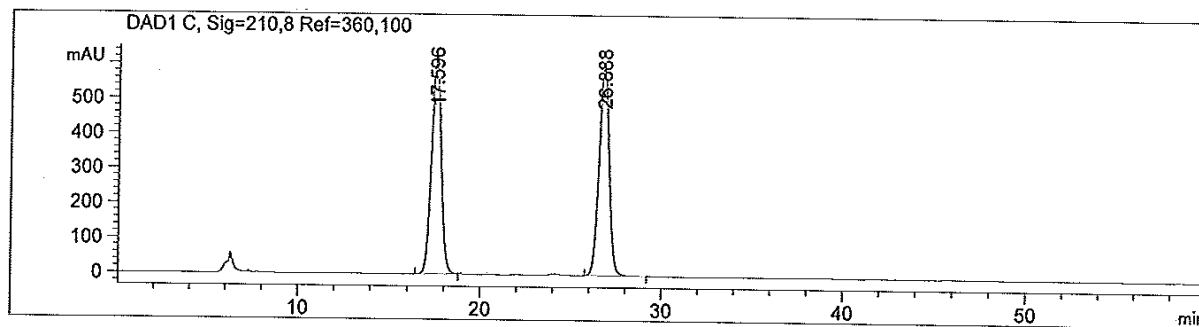

(b)

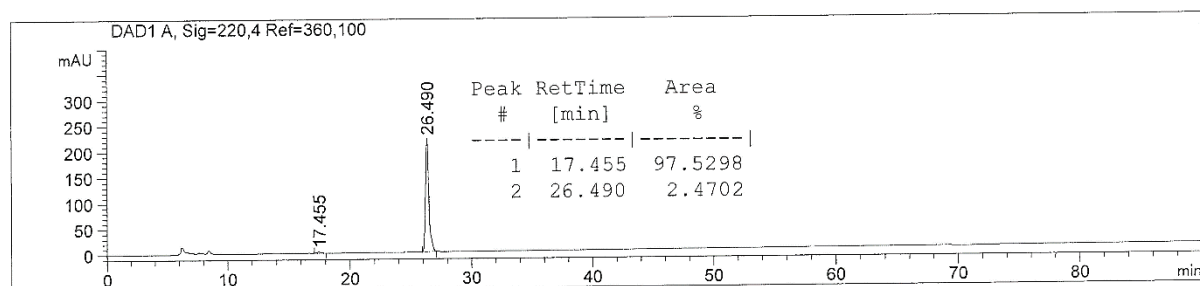

**Figure S93.** HPLC trace of: (a) racemic and (b) enantioenriched product (95% (*S*) ee using **4a** catalytic system; Scheme 3).

**1-Phenylpropyl diphenylphosphinate (from S45).**<sup>29</sup> Enantiomeric excess determined by

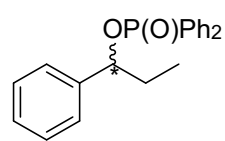

HPLC using Chiralcel AD (hexane/2-propanol=90/10, 0.5 mL/min, 220 nm).  $t_R = 24.5$  min (*R*);  $t_R = 42.2$  min (*S*).  $^1\text{H NMR}$  ( $\text{CDCl}_3$ ),  $\delta$ : 0.84 (t, 3H,  $J = 7.4$  Hz), 1.91-1.98 (m, 1H), 2.06-2.12 (m, 1H), 5.23-5.29 (m, 1H), 7.21-

7.85 (m, 15H).

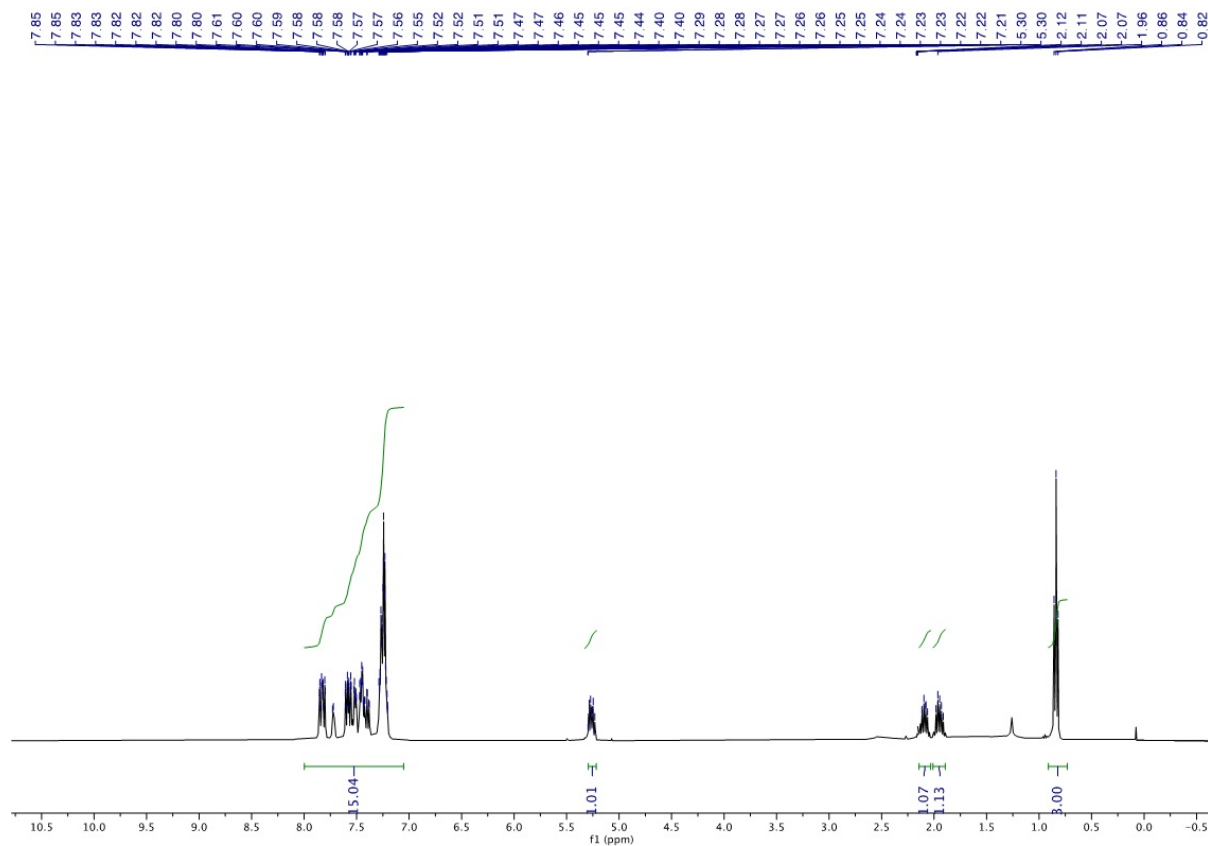

**Figure S94.**  $^1\text{H NMR}$  spectrum of 1-phenylpropyl diphenylphosphinate (from S45) in  $\text{CDCl}_3$ .

(a)

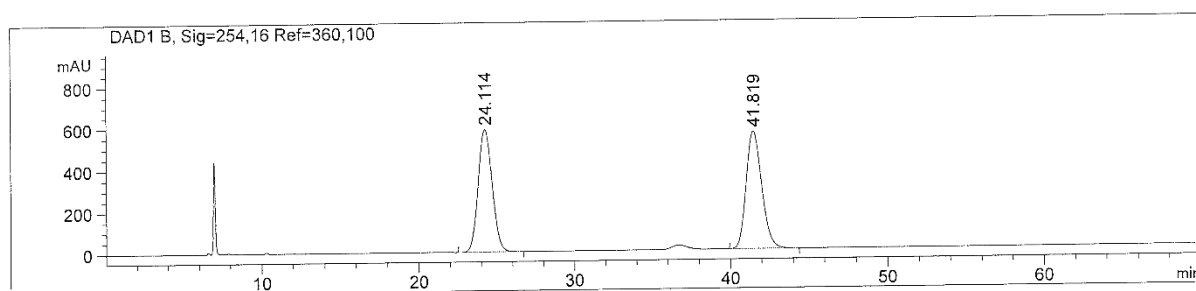

(b)

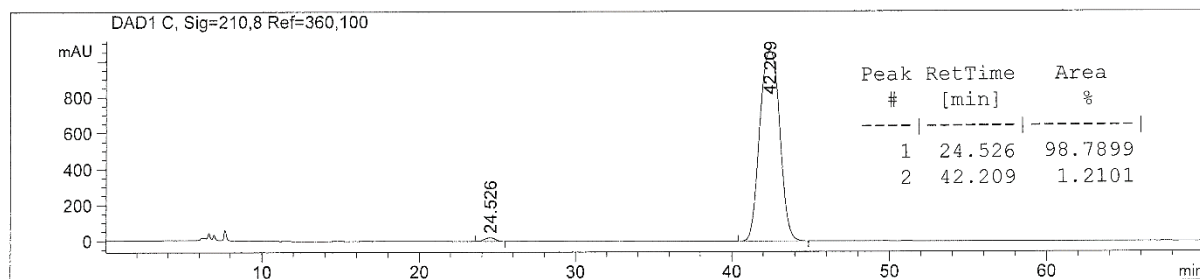

**Figure S95.** HPLC trace of: (a) racemic and (b) enantioenriched product (98% (*S*) ee using **4a** catalytic system; Scheme 3).

**2,2-Dimethylpentan-3-yl diphenylphosphinate (from S46).**<sup>29</sup> Enantiomeric excess determined by HPLC using Chiralcel IA (hexane/2-propanol=95/5, 0.5 mL/min, 220 nm).  $t_R$  26.6 min (*R*);  $t_R$  28.9 min (*S*).  $^1\text{H}$  NMR ( $\text{CDCl}_3$ ),  $\delta$ : 0.70 (t, 3H,  $J=7.2$  Hz), 0.89 (s, 9H), 1.04-1.25 (m, 2H), 1.51-1.50 (m, 2H), 4.21-4.26 (m, 1H), 7.40-7.81 (m, 10H).

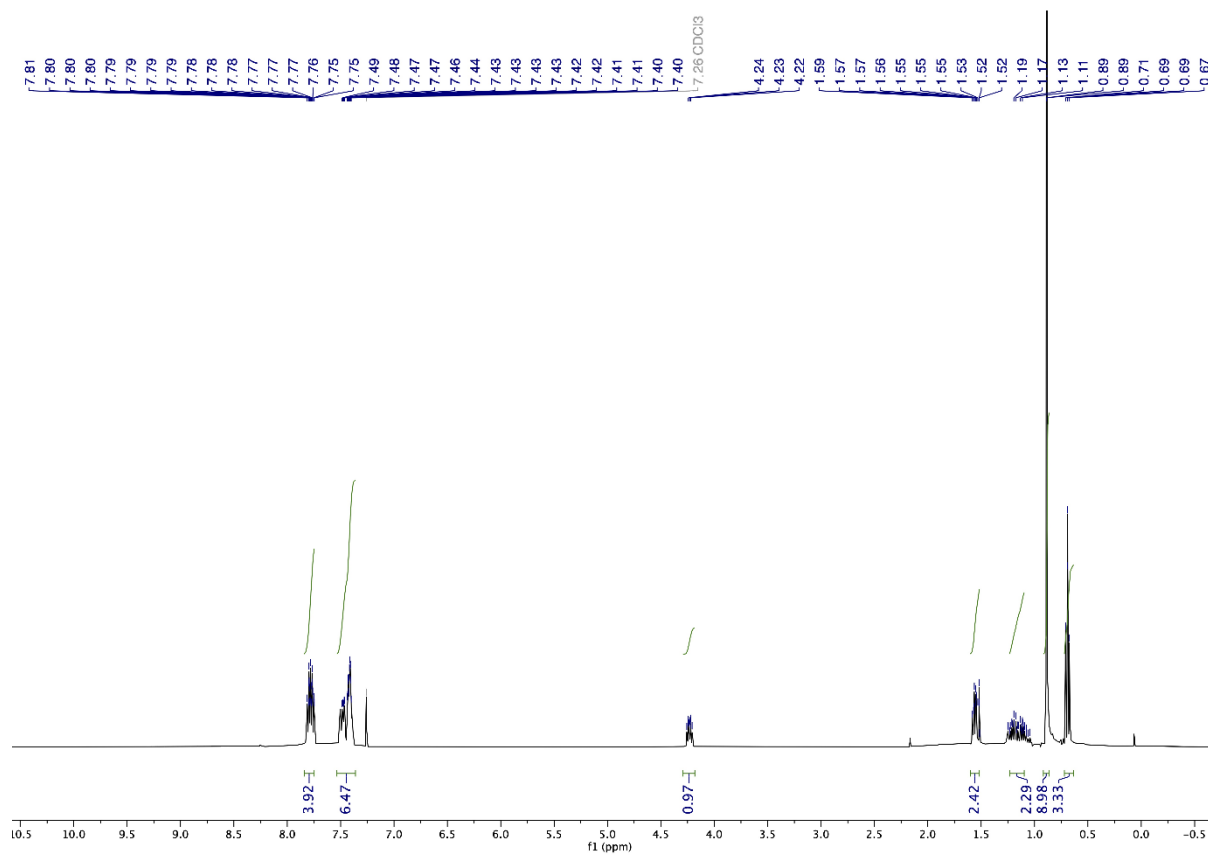

**Figure S96.**  $^1\text{H}$  NMR spectrum of 2,2-dimethylpentan-3-yl diphenylphosphinate (from S46) in  $\text{CDCl}_3$ .

(a)

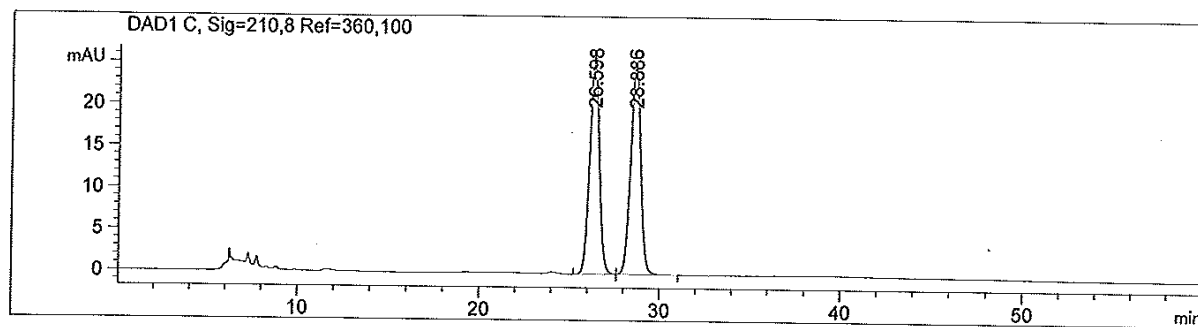

(b)

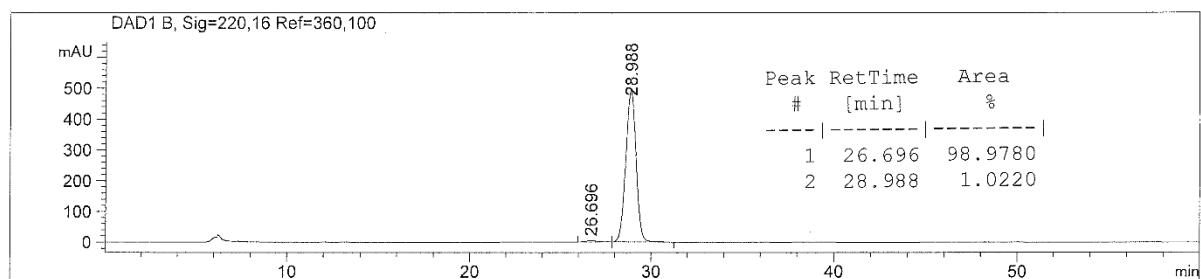

**Figure S97.** HPLC trace of: (a) racemic and (b) enantioenriched product (98% (*S*) ee using **4a** catalytic system; Scheme 3).



**3-Methylbutan-2-yl diphenylphosphinate (from S47).**<sup>29</sup> Enantiomeric excess determined by HPLC

using Chiralcel S,S Whelk-01 (hexane/2-propanol=98/2, 0.5 mL/min, 220 nm).  $t_R$  93.1 min (*R*);  $t_R$  102.1 min (*S*).  $^1\text{H NMR}$  ( $\text{CDCl}_3$ ),  $\delta$ : 0.90 (dd, 3H,  $J=0.8$  Hz,  $J=6.8$  Hz), 0.92 (dd, 3H,  $J=0.8$  Hz,  $J=6.8$  Hz), 1.22 (dd, 3H,  $J=0.8$  Hz,  $J=6.4$  Hz), 1.87-1.92 (m, 1H), 4.35-4.40 (m, 1H), 7.41-7.51 (m, 6H), 7.75-7.83 (m, 4H).

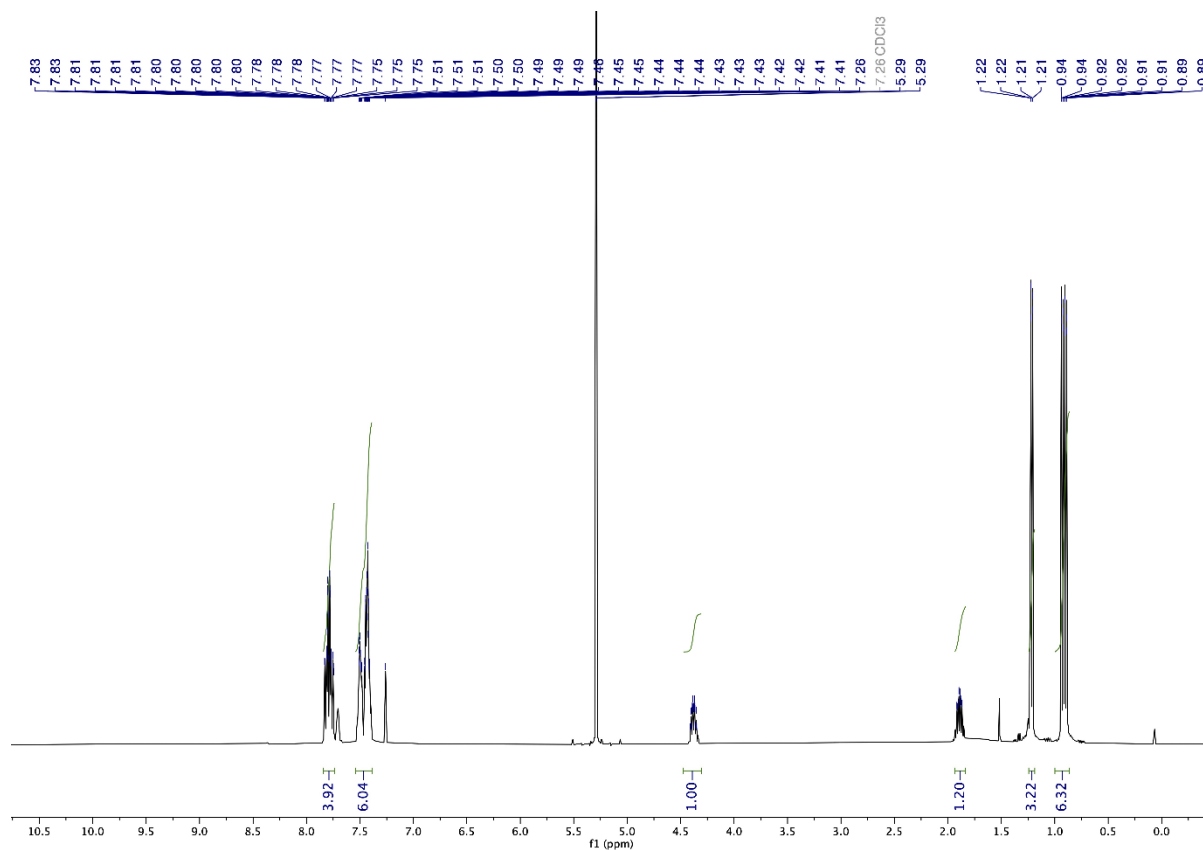

**Figure S98.**  $^1\text{H NMR}$  spectrum of 3-methylbutan-2-yl diphenylphosphinate (from S47) in  $\text{CDCl}_3$ . The peak at 5.29 corresponds to  $\text{CH}_2\text{Cl}_2$ .

(a)

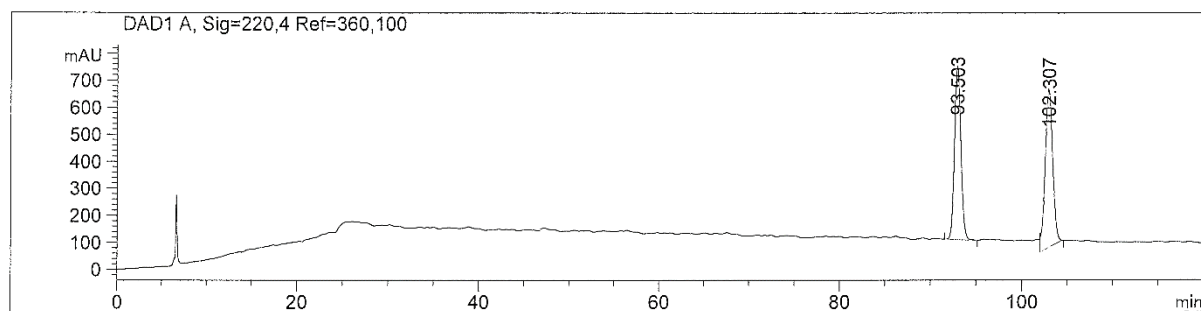

(b)

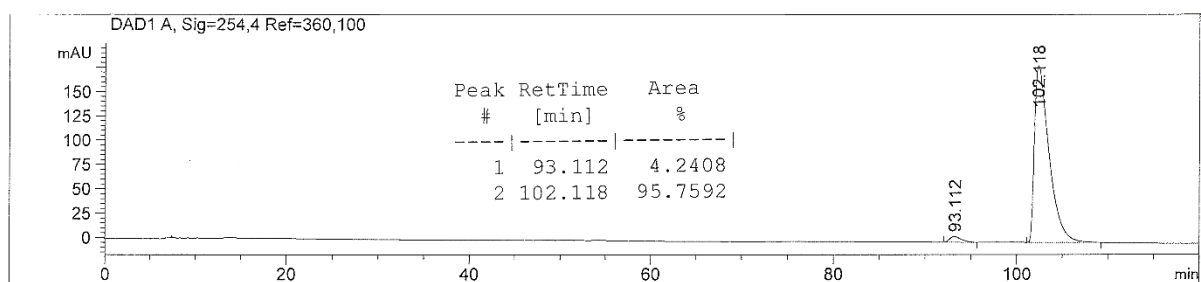

**Figure S99.** HPLC trace of: (a) racemic and (b) enantioenriched product (92% (*R*) ee using **4a** catalytic system; Scheme 3).

**1-Phenylethyl diphenylphosphinate (from S48).**<sup>45</sup> Enantiomeric excess determined by HPLC using

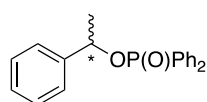

Chiralcel AD (hexane/2-propanol=90/10, 0.5 mL/min, 220 nm).  $t_R$  32.6 min (*R*);  $t_R$

37.0 min (*S*). <sup>1</sup>H NMR (CDCl<sub>3</sub>),  $\delta$ : 1.66 (d, 3H,  $J$ = 6.5 Hz), 5.48-5.62 (m, 1H), 7.27-

7.34 (m, 7H), 7.42-7.54 (m, 4H), 7.62-7.67 (m, 2H), 7.81-7.86 (m, 2H).

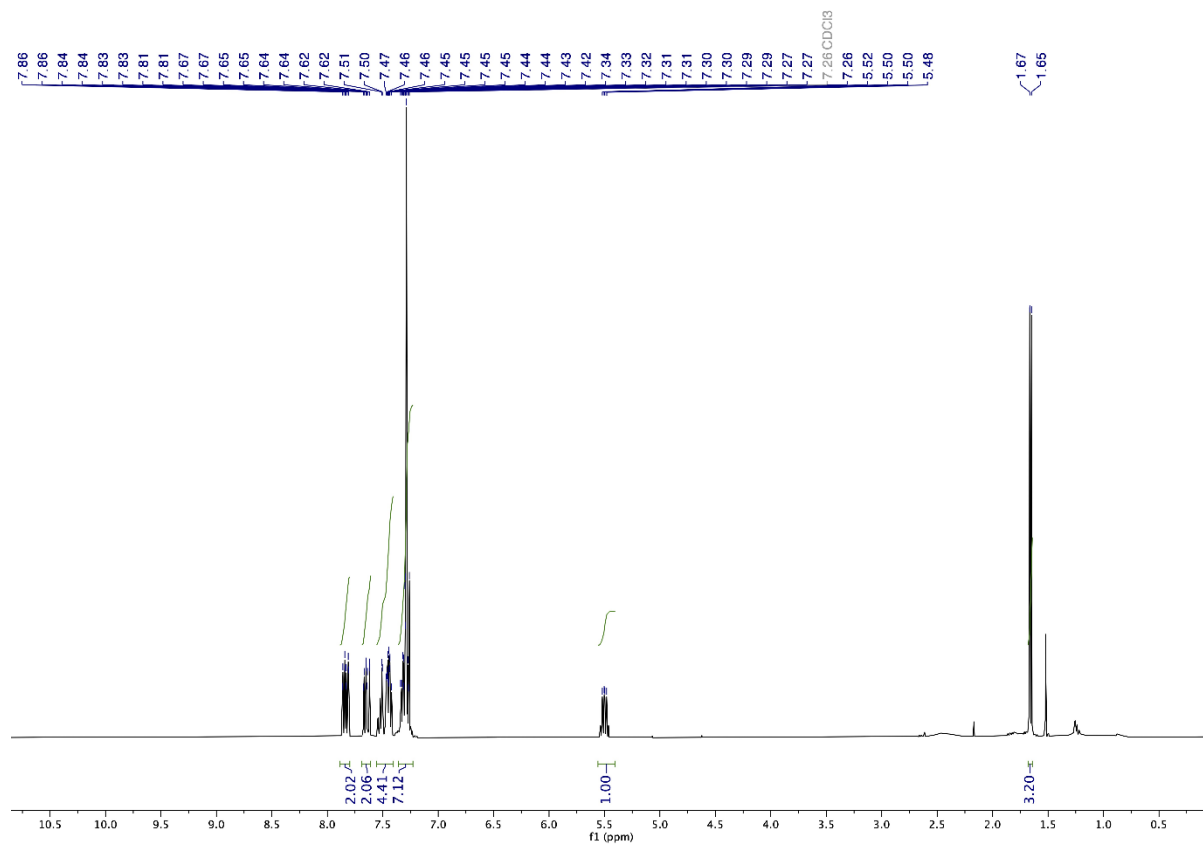

**Figure S100.** <sup>1</sup>H NMR spectrum of 1-phenylethyl diphenylphosphinate (from S48) in CDCl<sub>3</sub>.

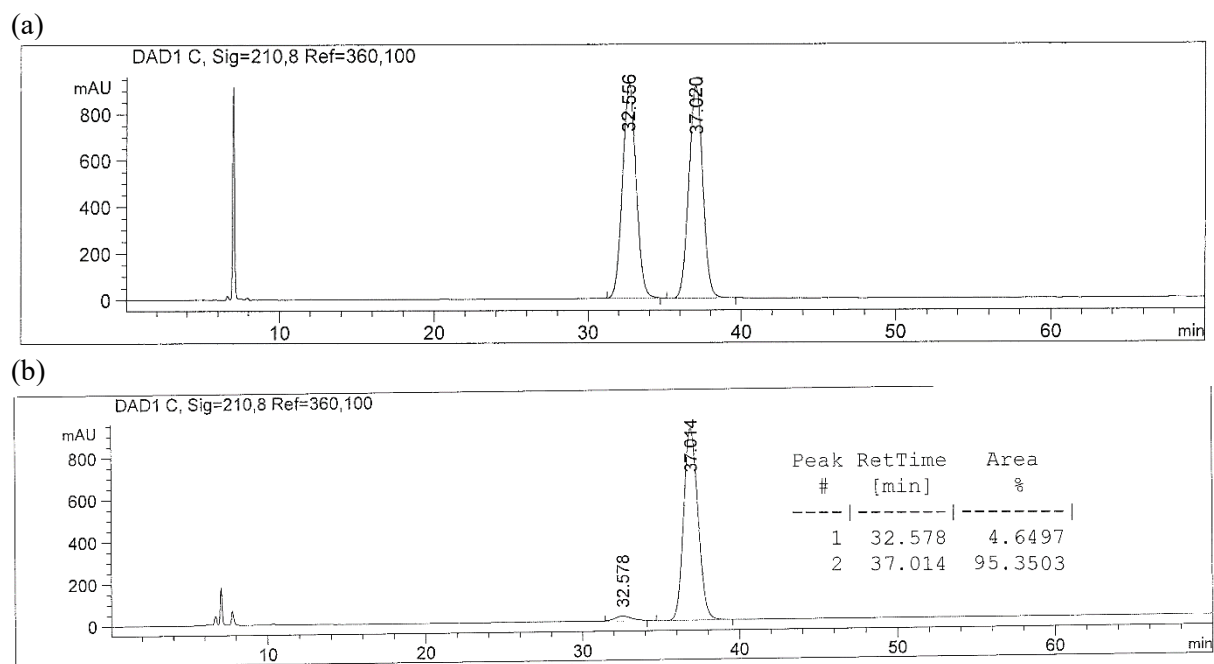

**Figure S101.** HPLC trace of: (a) racemic and (b) enantioenriched product (91% (*R*) ee using **4a** catalytic system; Scheme 3).

**2-Benzylcyclohexan-1-one (from S49).**<sup>44</sup> Enantiomeric excess determined by HPLC using Chiracel OJ-

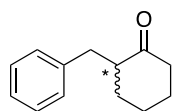

H column (hexane/2-propanol=97/3, 1 mL/min, 210 nm).  $t_R$  8.4 min (*S*);  $t_R$  9.2 min

(*R*).  $^1\text{H}$  NMR ( $\text{CDCl}_3$ ),  $\delta$ : 1.35-1.38 (m, 1H), 1.63-1.71 (m, 2H), 1.82-1.85 (m, 1H),

2.01-2.07 (m, 2H), 2.33-2.46 (m, 3H), 2.52-2.58 (m, 1H), 3.24 (dd, 1H,  $J=14.0$  Hz,  $J=$

4.6 Hz), 7.15-7.22 (m, 3H), 7.26-7.30 (m, 2H).

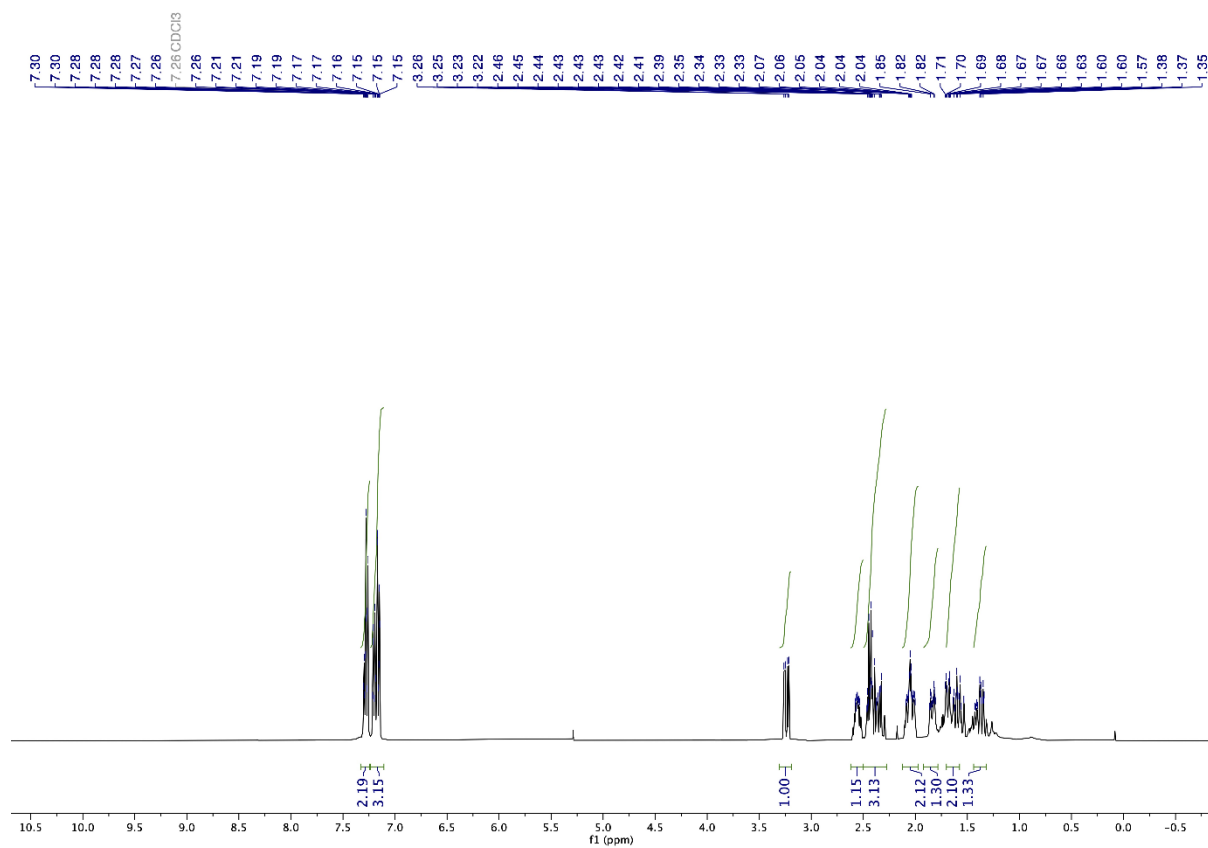

**Figure S102.**  $^1\text{H}$  NMR spectrum of 2-benzylcyclohexan-1-one (from S49) in  $\text{CDCl}_3$ .

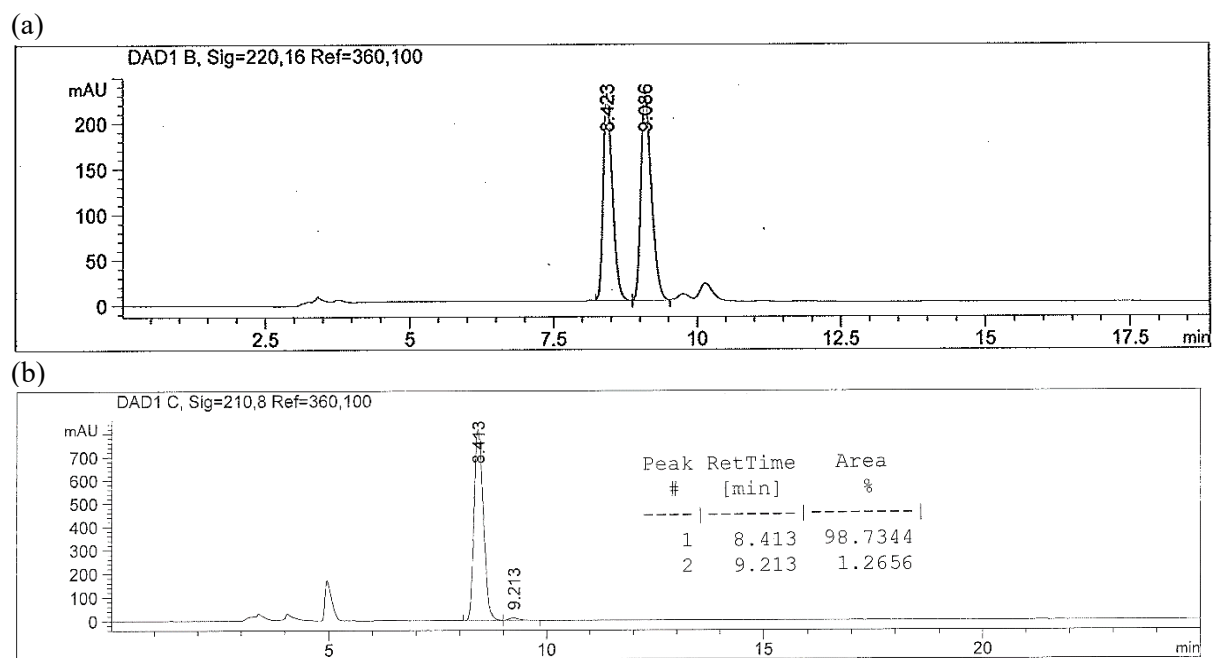

**Figure S103.** HPLC trace of: (a) racemic and (b) enantioenriched product (97% (*S*) ee using **4a** catalytic system; Scheme 4).

**2-Benzylcyclopentan-1-one (from S50).**<sup>31</sup> Enantiomeric excess determined by HPLC using Chiralcel OJ-H column (hexane/2-propanol=99/1, 1 mL/min, 210 nm).  $t_R$  13.0 min (*S*);  $t_R$  14.4 min (*R*).  $^1\text{H}$  NMR ( $\text{CDCl}_3$ ),  $\delta$ : 1.53-1.60 (m, 1H), 1.72-1.76 (m, 1H), 1.94-1.97 (m, 1H), 2.06-2.15 (m, 2H), 2.31-2.38 (m, 2H), 2.54 (dd, 1H,  $J=13.8$  Hz,  $J=9.5$  Hz), 3.15 (dd, 1H,  $J=13.8$  Hz,  $J=4.1$  Hz), 7.15-7.22 (m, 3H), 7.26-7.30 (m, 2H).

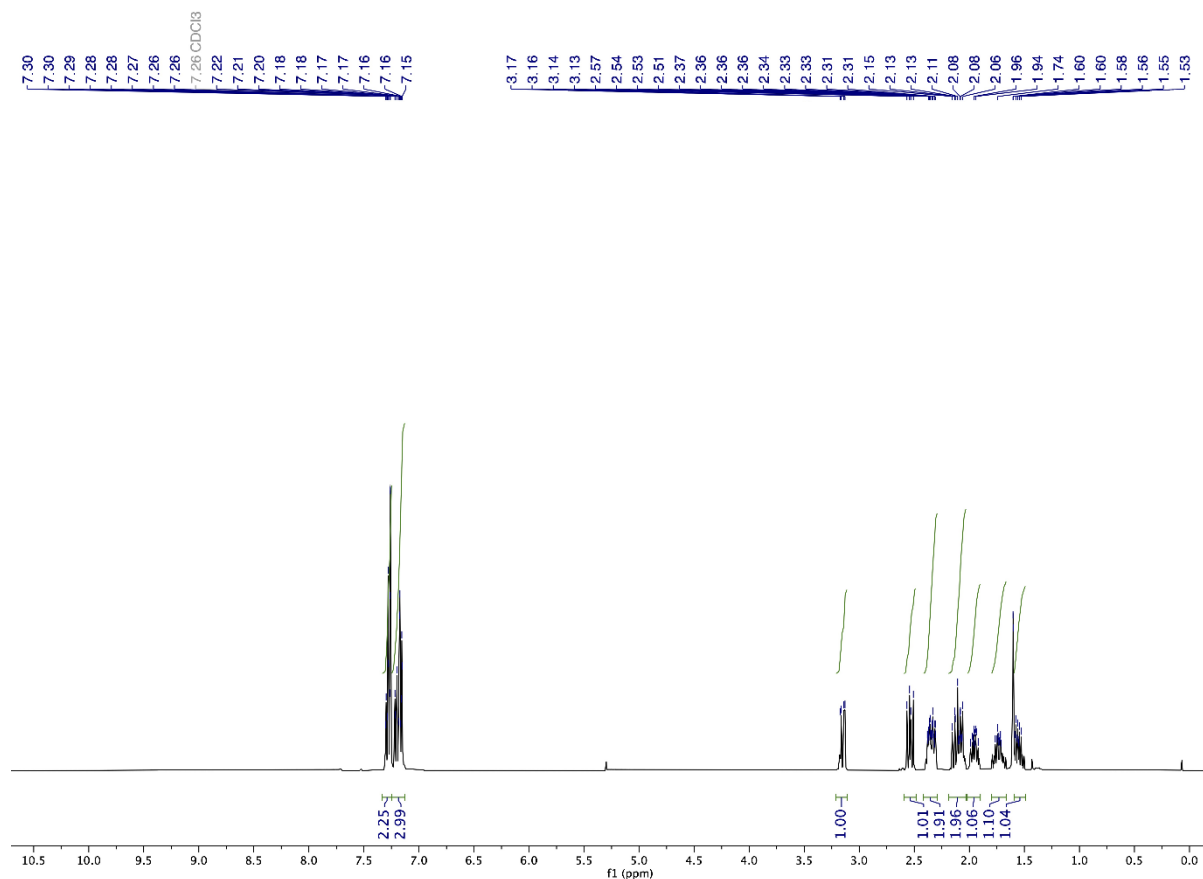

**Figure S104.**  $^1\text{H}$  NMR spectrum of 2-benzylcyclopentan-1-one (from S50) in  $\text{CDCl}_3$ .

(a)

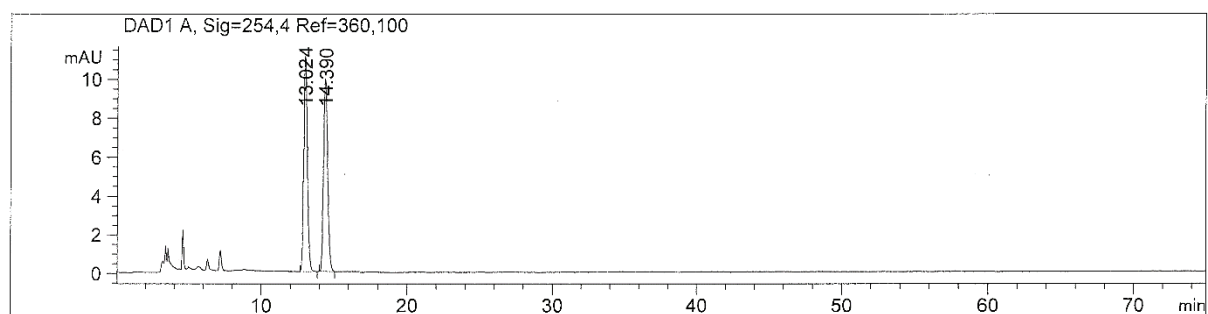

(b)

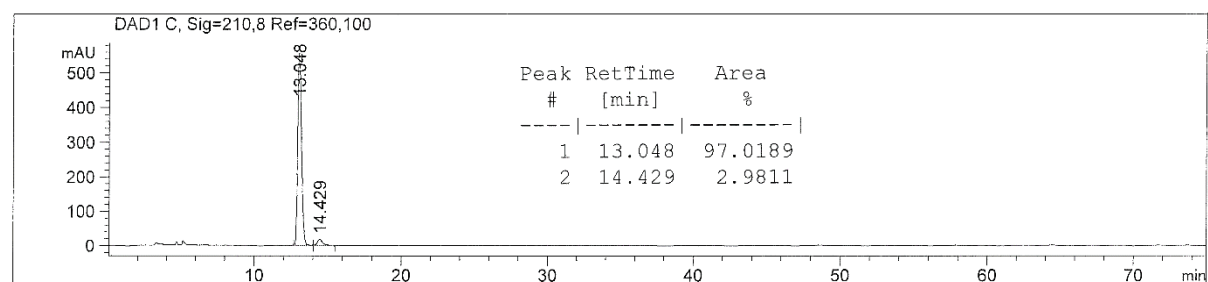

**Figure S105.** HPLC trace of: (a) racemic and (b) enantioenriched product (94% (*S*) ee using **4a** catalytic system; Scheme 4).



**3-Benzyltetrahydro-2H-pyran-2-one (from S51).**<sup>34</sup> Enantiomeric excess determined by HPLC using

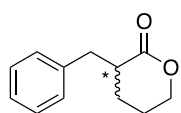

Chiralcel OJ-H column (hexane/2-propanol=90/10, 1 mL/min, 210 nm).  $t_R$  37.3 min (*R*);  $t_R$  43.4 min (*S*).  $^1\text{H NMR}$  ( $\text{CDCl}_3$ ),  $\delta$ : 1.49-1.56 (m, 1H), 1.79-1.94 (m, 3H), 2.68-2.77 (m, 2H), 3.34-3.41 (m, 1H), 4.23-4.34 (m, 2H), 7.18-7.32 (m, 5H).

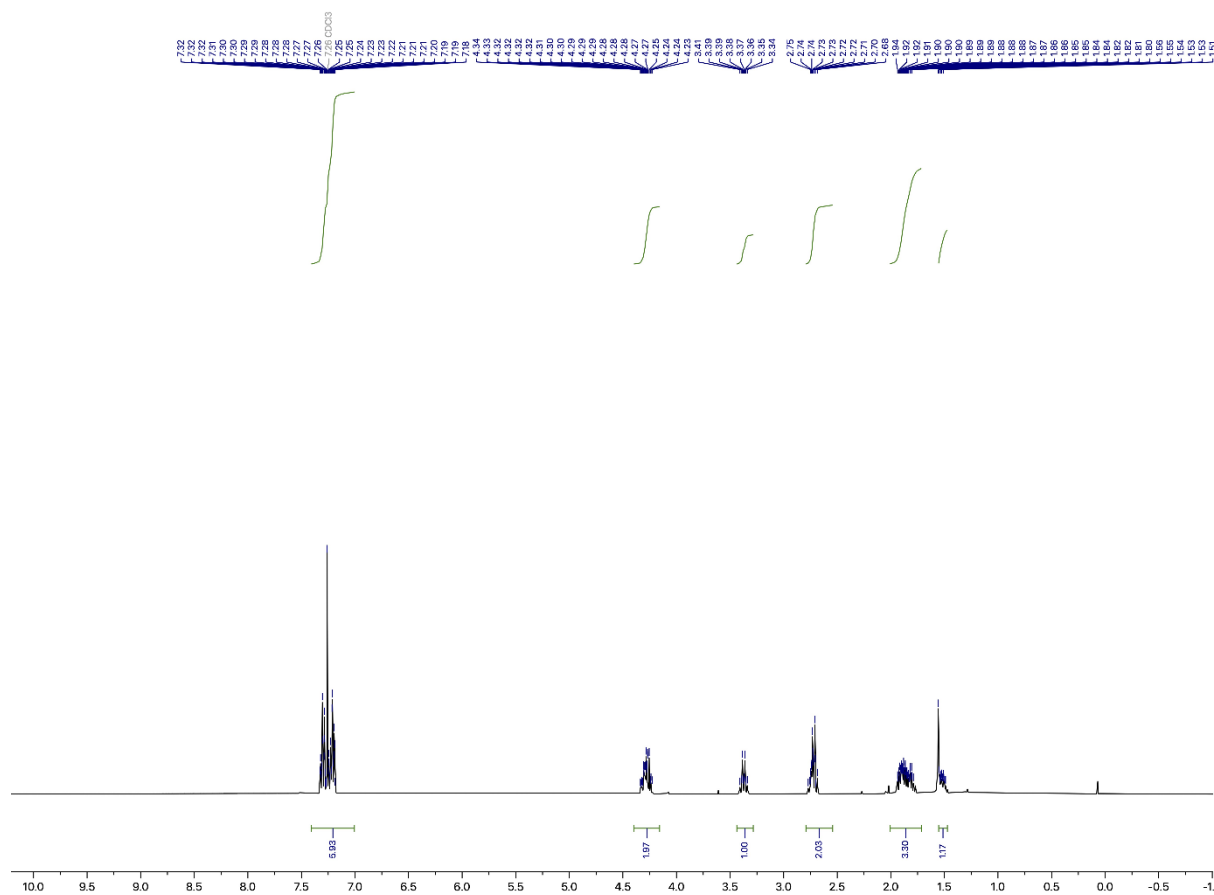

**Figure S106.**  $^1\text{H NMR}$  spectrum of 3-benzyltetrahydro-2H-pyran-2-one (from S51) in  $\text{CDCl}_3$ .

(a)

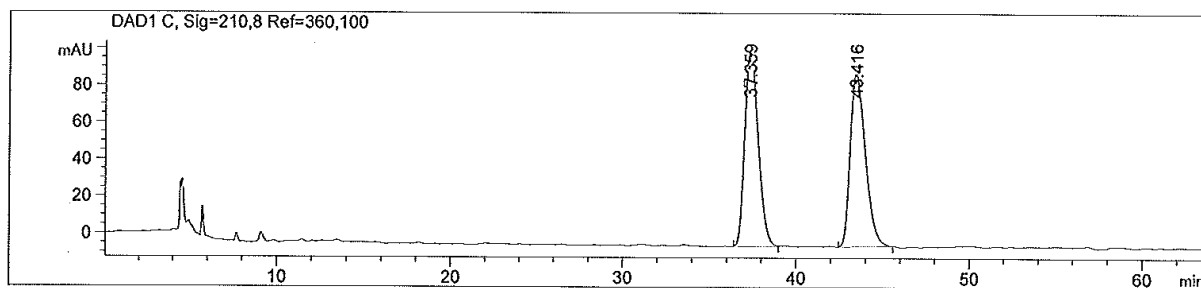

(b)

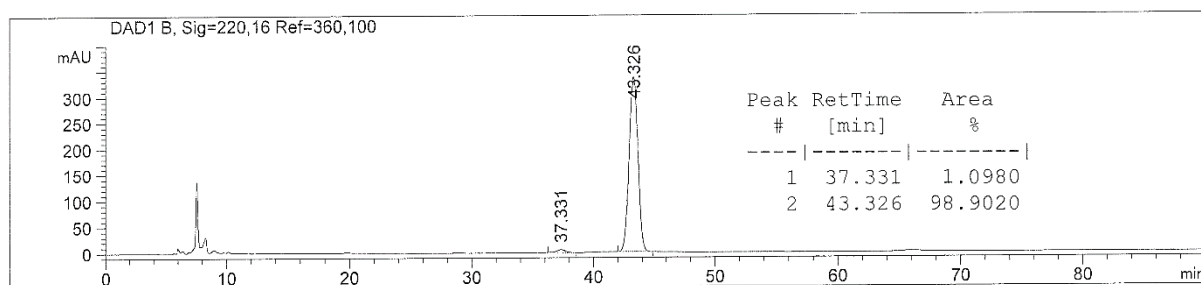

**Figure S107.** HPLC trace of: (a) racemic and (b) enantioenriched product (98% (*S*) ee using **4a** catalytic system; Scheme 4).

**3-(4-Methoxybenzyl)tetrahydro-2H-pyran-2-one (from S52).**<sup>33</sup> Enantiomeric excess determined by HPLC using Chiracel AD column (hexane/2-propanol=95/5, 0.5 mL/min, 220 nm).  $t_R$  41.4 min (*S*);  $t_R$  43.5 min (*R*).  $^1\text{H NMR}$  ( $\text{CDCl}_3$ ),  $\delta$ : 1.49-1.54 (m, 1H), 1.77 – 1.94 (m, 3H), 2.64 – 2.73 (m, 2H), 3.28 (q, 1H,  $J=8.6$  Hz), 3.79 (s, 3H), 4.22-4.30 (m, 2H), 6.84 (d, 2H,  $J=8.6$  Hz), 7.12 (d, 2H,  $J=8.6$  Hz).

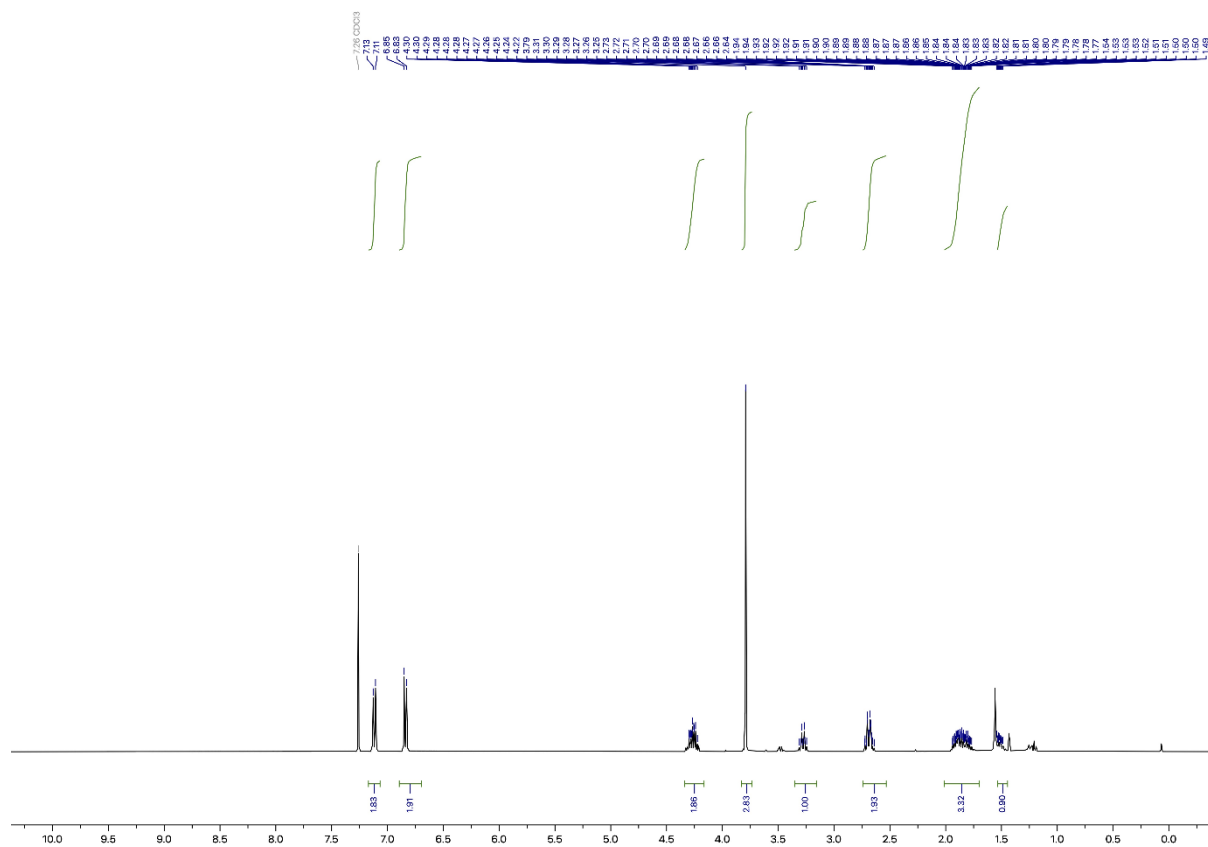

**Figure S108.**  $^1\text{H NMR}$  spectrum of 3-(4-methoxybenzyl)tetrahydro-2H-pyran-2-one (from S52) in  $\text{CDCl}_3$ .

(a)

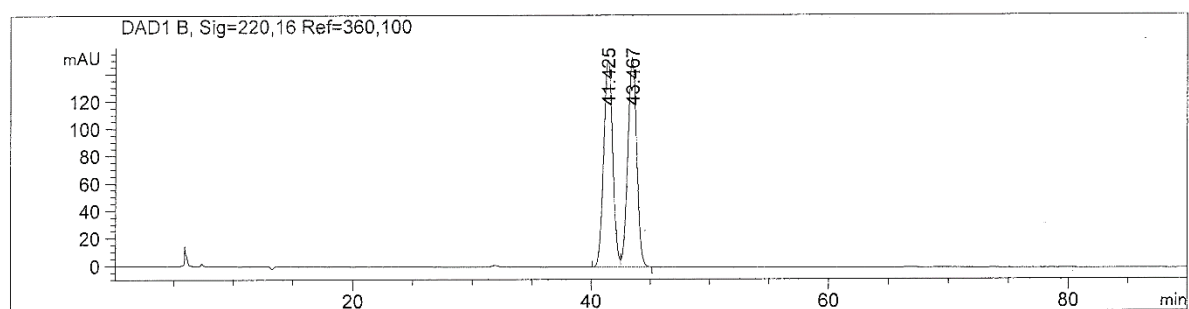

(b)

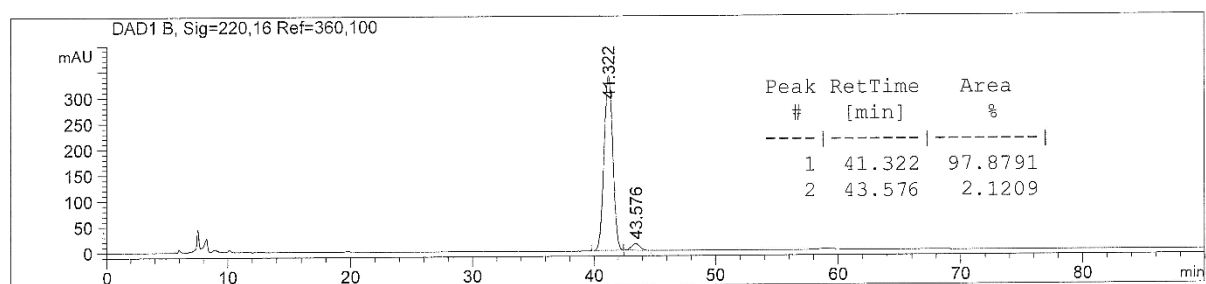

**Figure S109.** HPLC trace of: (a) racemic and (b) enantioenriched product (96% (*S*) ee using **4a** catalytic system; Scheme 4).

**3-(4-Bromobenzyl)tetrahydro-2H-pyran-2-one (from S53).**<sup>33</sup> Enantiomeric excess determined by

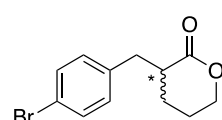

HPLC using Chiracel IA column (hexane/2-propanol=95/5, 0.5 mL/min, 210 nm).

$t_R$  40.9 min (*S*);  $t_R$  46.5 min (*R*). <sup>1</sup>H NMR (CDCl<sub>3</sub>),  $\delta$ : 1.48-1.53 (m, 1H), 1.80-

1.93 (m, 3H), 2.68-2.74 (m, 2H), 3.26-3.30 (m, 1H), 4.22-4.32 (m, 2H), 7.08 (d,

$J= 8.3$  Hz, 2H), 7.41 (d, 2H,  $J= 8.3$  Hz).

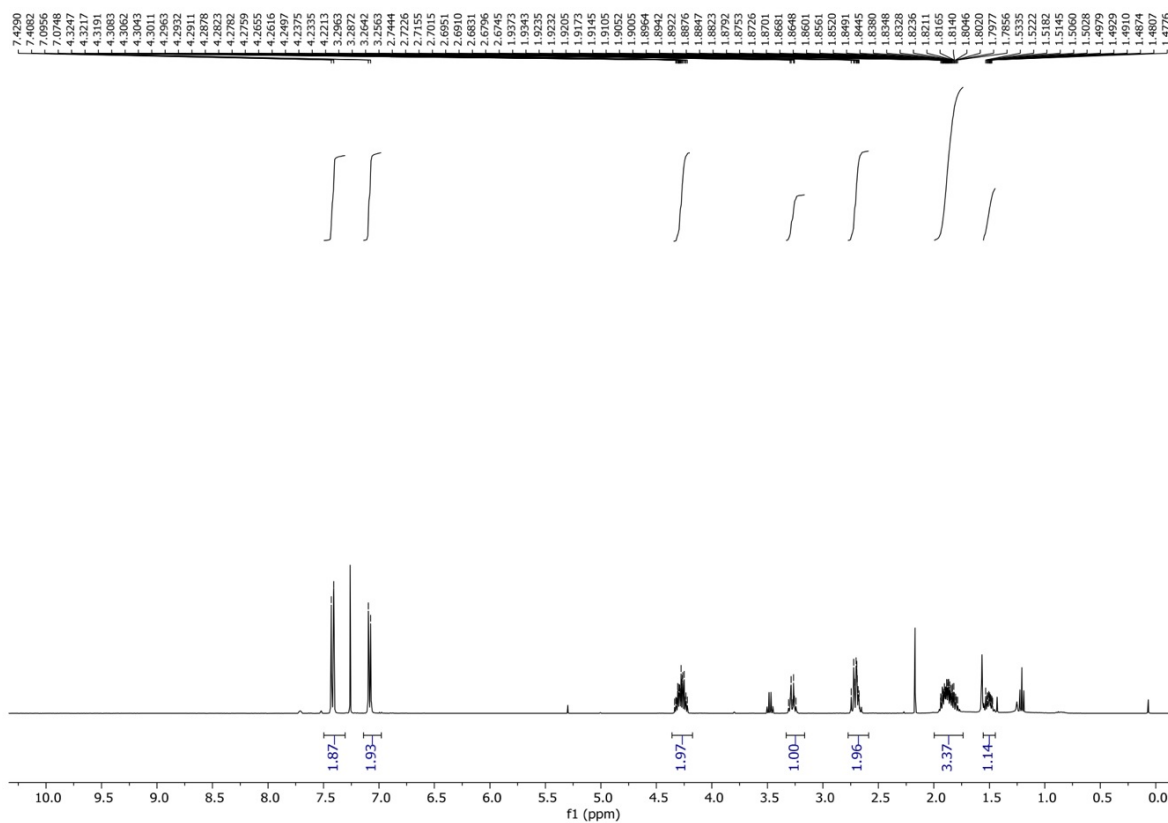

**Figure S110.** <sup>1</sup>H NMR spectrum of 3-(4-bromobenzyl)tetrahydro-2H-pyran-2-one (from S53) in CDCl<sub>3</sub>.

(a)

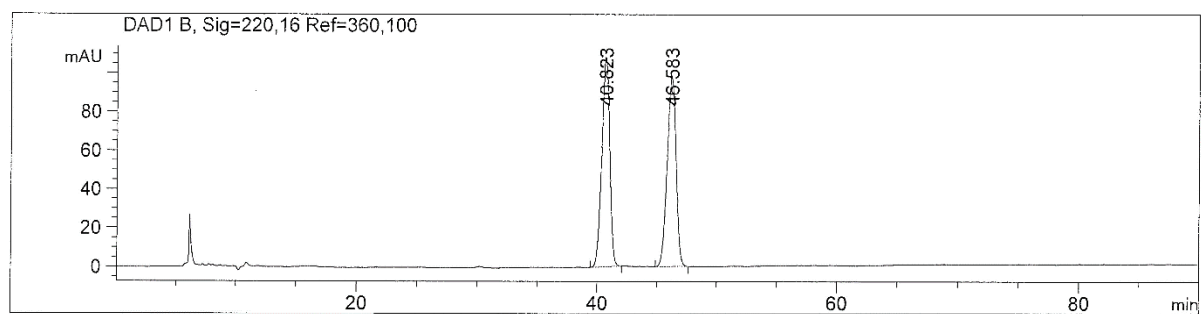

(b)

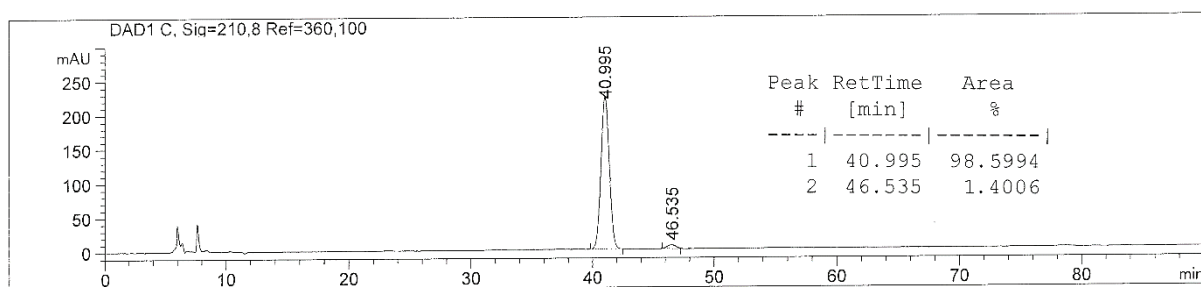

**Figure S111.** HPLC trace of: (a) racemic and (b) enantioenriched product (97% (*S*) ee using **4a** catalytic system; Scheme 4).

**3-(4-(Trifluoromethyl)benzyl)tetrahydro-2H-pyran-2-one (from S54).**<sup>33</sup> Enantiomeric excess

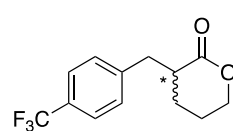

determined by HPLC using Chiracel IA column (hexane/2-propanol=95/5, 0.5

mL/min, 210 nm).  $t_R$  30.8 min (*S*);  $t_R$  33.6 min (*R*).  $^1\text{H}$  NMR ( $\text{CDCl}_3$ ),  $\delta$ : 1.53-

1.57 (m, 1H), 1.83-1.95 (m, 3H), 2.73-2.78 (m, 2H), 2.82-2.84 (m, 1H), 3.39 (dd,

1H,  $J=4.2$  Hz,  $J=13.3$  Hz), 4.26-4.32 (m, 2H), 7.33 (d, 2H,  $J=8.0$  Hz), 7.56 (d, 2H,  $J=8.0$  Hz).

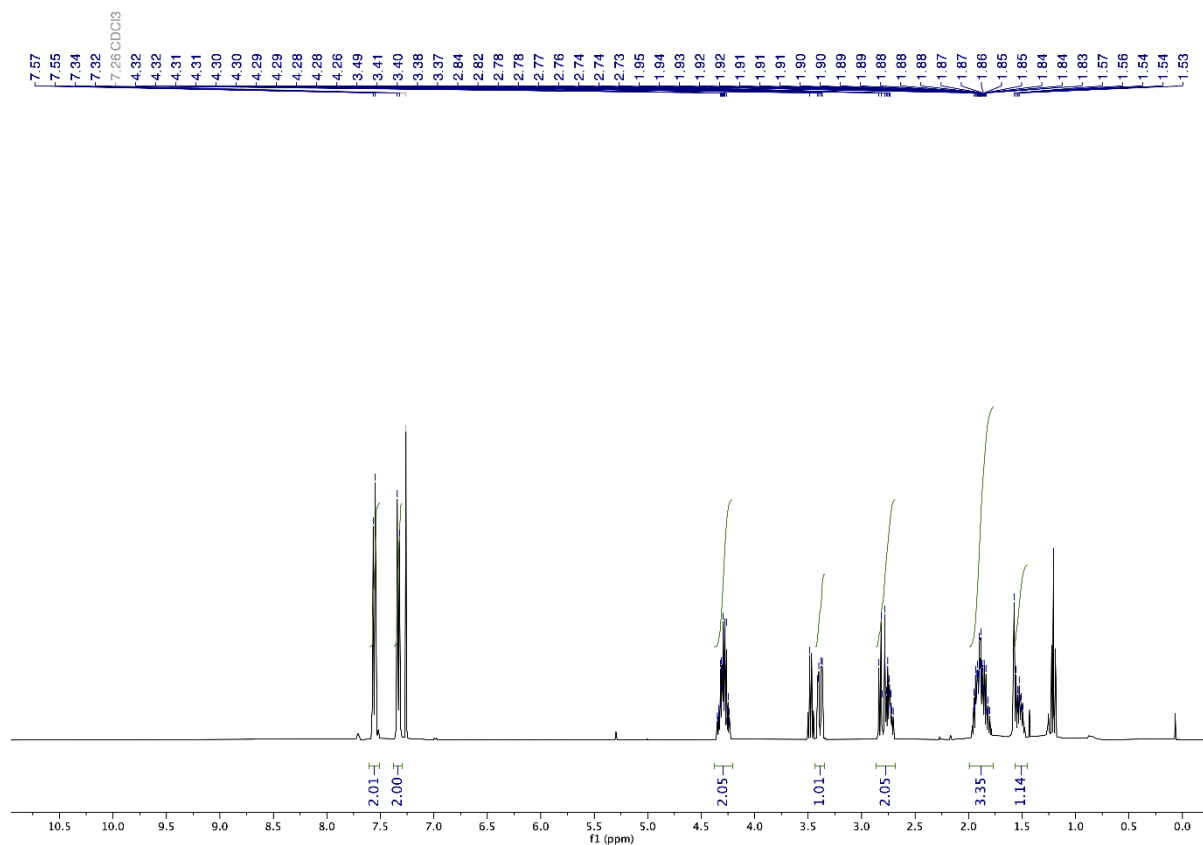

**Figure S112.**  $^1\text{H}$  NMR spectrum of 3-(4-(trifluoromethyl)benzyl)tetrahydro-2H-pyran-2-one (from S54) in  $\text{CDCl}_3$ .

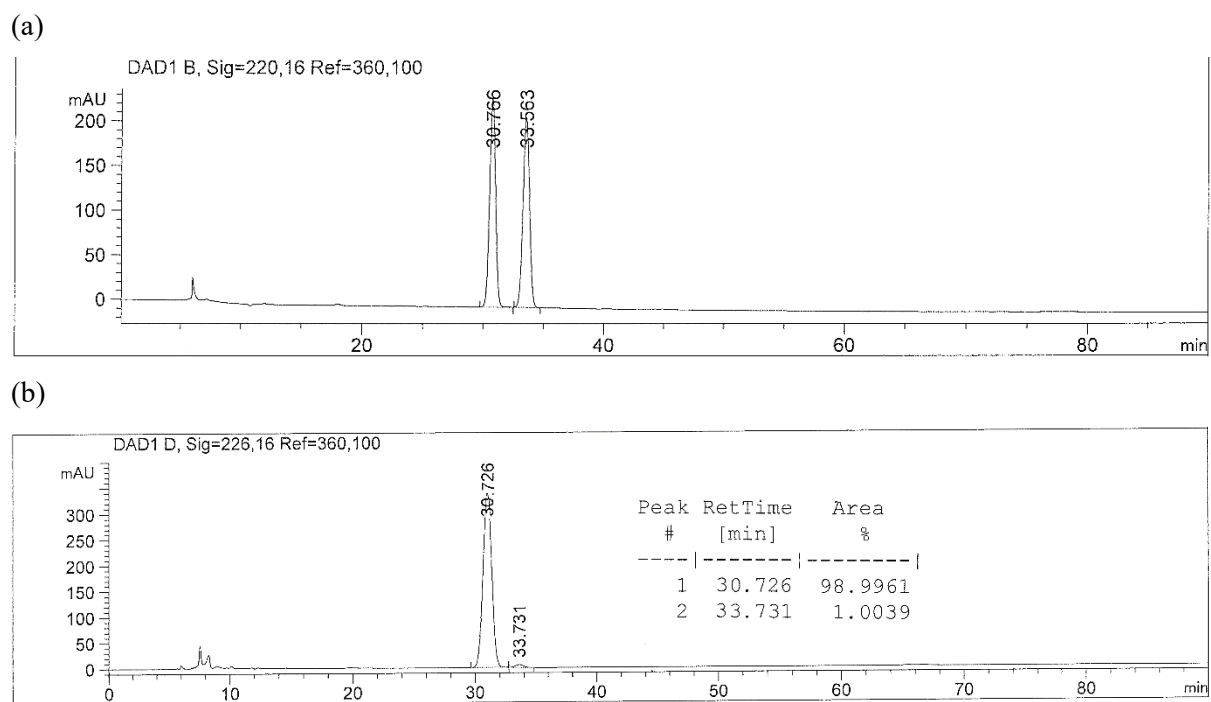

**Figure S113.** HPLC trace of: (a) racemic and (b) enantioenriched product (98% (*S*) ee using **4a** catalytic system; Scheme 4).



**3-(3-Methoxybenzyl)tetrahydro-2H-pyran-2-one (from S55).**<sup>33</sup> Enantiomeric excess determined by

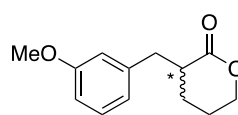

HPLC using Chiralcel IA column (hexane/2-propanol=95/5, 0.5 mL/min, 210

nm).  $t_R$  37.6 min (*S*);  $t_R$  46.2 min (*R*).  $^1\text{H NMR}$  ( $\text{CDCl}_3$ ),  $\delta$ : 1.52-1.56 (m, 1H),

1.81-1.91 (m, 3H), 2.65-2.72 (m, 2H), 3.34-3.49 (m, 1H), 3.80 (s, 3H), 4.26-

4.31(m, 2H), 6.75-6.80 (m, 3H), 7.20-7.24 (m, 1H).

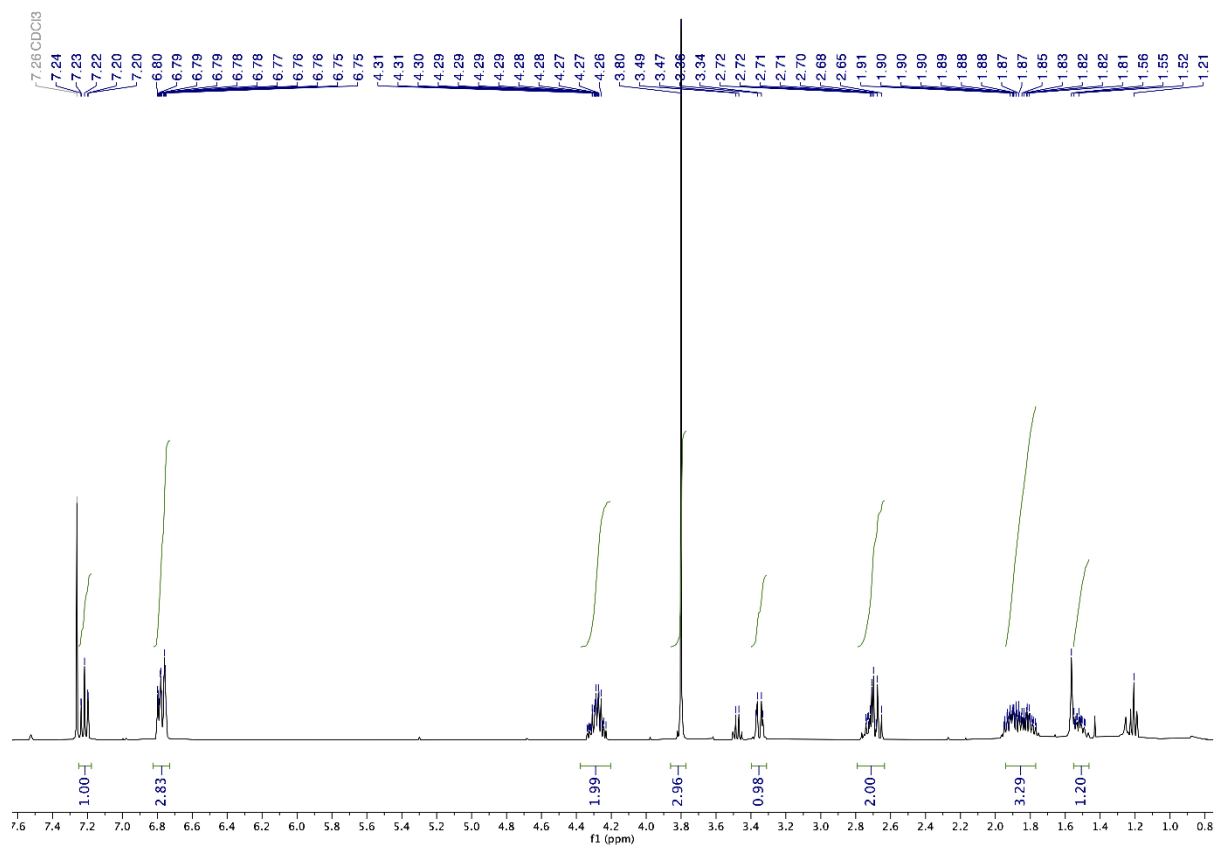

**Figure S114.**  $^1\text{H NMR}$  spectrum of 3-(3-methoxybenzyl)tetrahydro-2H-pyran-2-one (from S55) in  $\text{CDCl}_3$ .

(a)

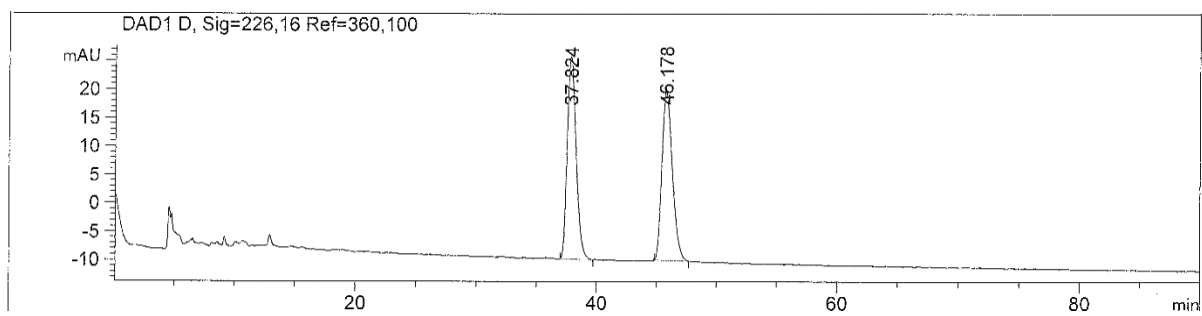

(b)

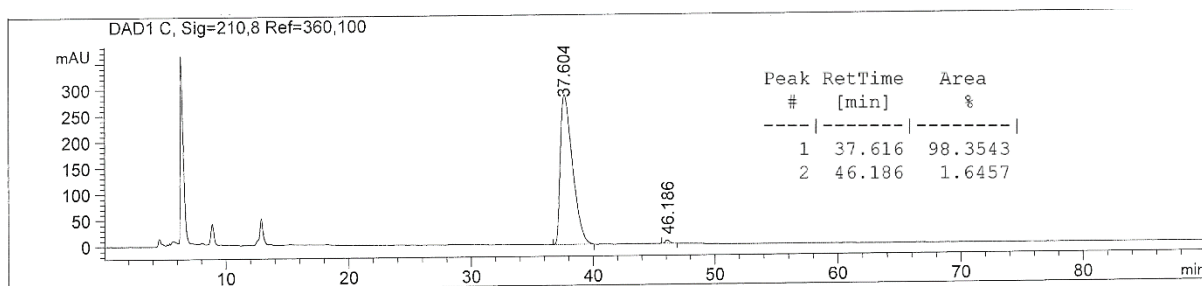

**Figure S115.** HPLC trace of: (a) racemic and (b) enantioenriched product (97% (*S*) ee using **4a** catalytic system; Scheme 4).

**3-(2-Methoxybenzyl)tetrahydro-2H-pyran-2-one (from S56).**<sup>33</sup> Enantiomeric excess determined by

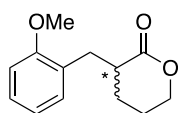

HPLC using Chiracel IA column (hexane/2-propanol=95/5, 0.5 mL/min, 210 nm).  $t_R$  40.2 min (*S*);  $t_R$  41.1 min (*R*).  $^1\text{H NMR}$  ( $\text{CDCl}_3$ ),  $\delta$ : 1.48-1.53 (m, 1H), 1.77-1.90 (m, 3H), 2.66 (dd, 1H,  $J=9.6$  Hz,  $J=13.5$  Hz), 2.81-2.88 (m, 1H), 3.39-3.44 (dd, 1H,  $J=4.6$  Hz,  $J=13.5$  Hz), 3.77 (s, 3H), 4.26-4.29 (m, 2H), 6.84-6.90 (m, 2H), 7.15 (dd, 1H,  $J=1.7$  Hz,  $J=7.4$  Hz, 1H), 7.21 (dd, 1H,  $J=1.8$  Hz,  $J=7.8$  Hz).

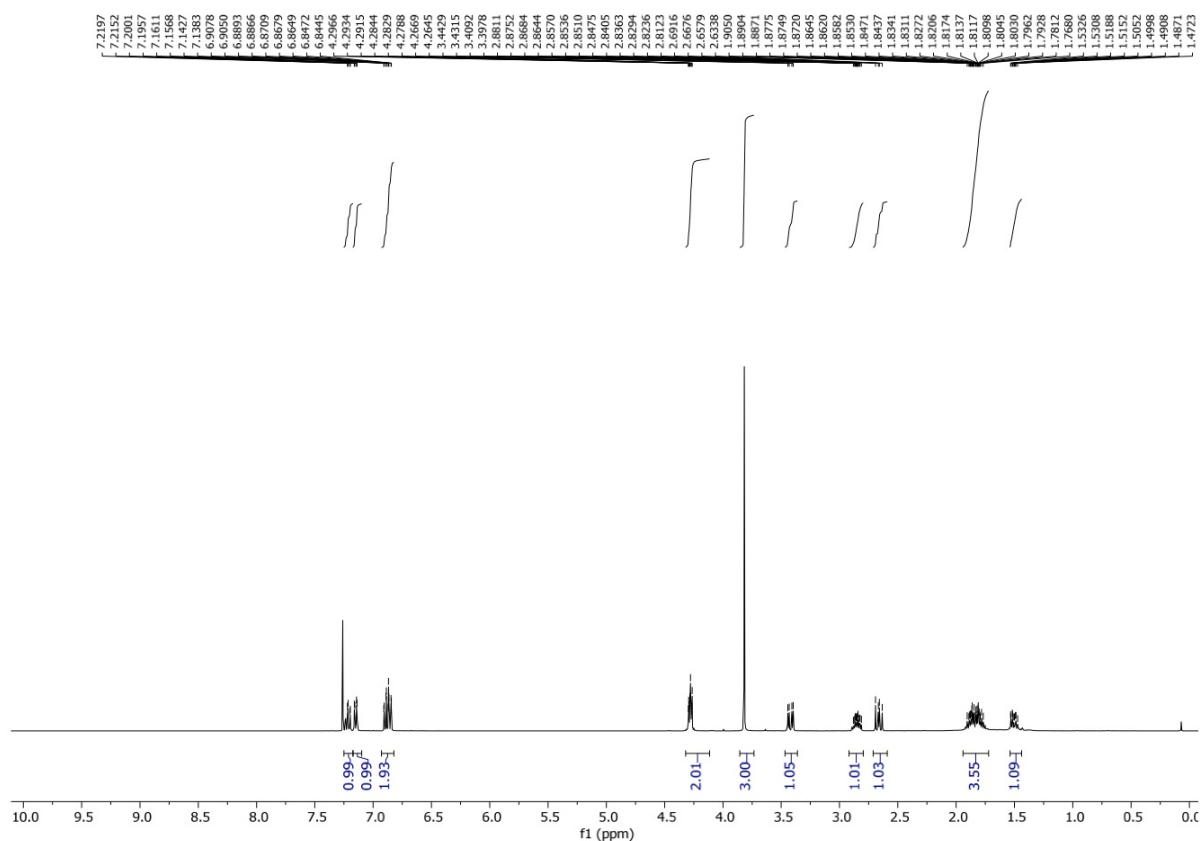

**Figure S116.**  $^1\text{H NMR}$  spectrum of 3-(2-methoxybenzyl)tetrahydro-2H-pyran-2-one (from S56) in  $\text{CDCl}_3$ .

(a)

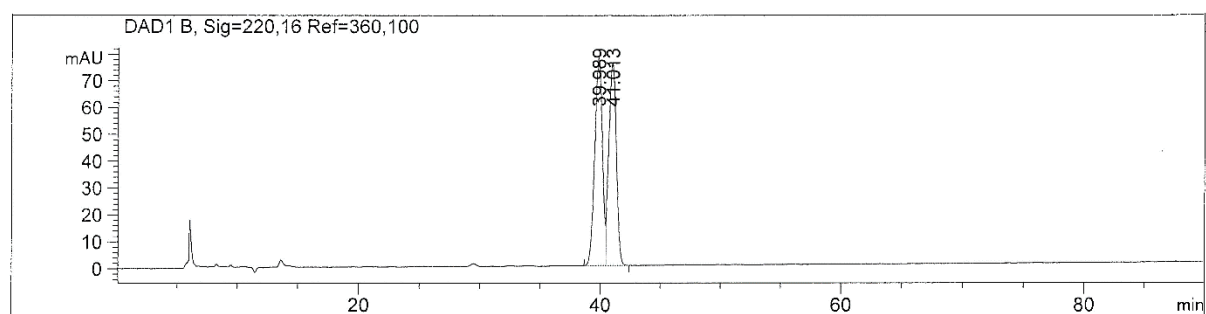

(b)

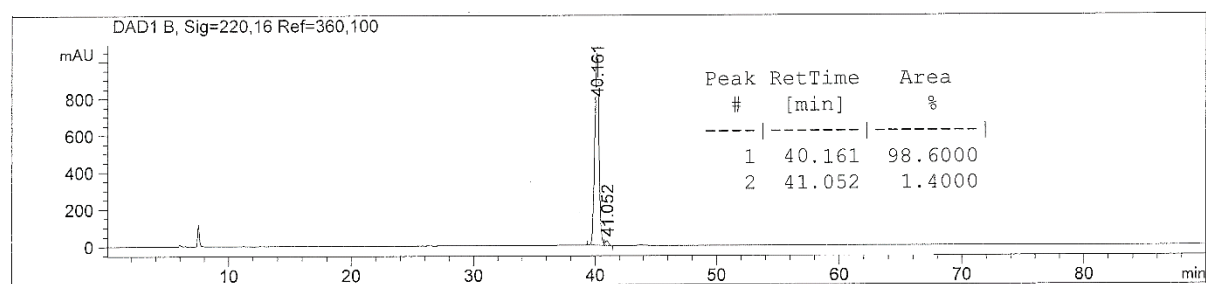

**Figure S117.** HPLC trace of: (a) racemic and (b) enantioenriched product (97% (*S*) ee using **4a** catalytic system; Scheme 4).

**3-Benzylidihydrofuran-2(3*H*)-one (from S57).**<sup>32</sup> Enantiomeric excess determined by HPLC using Chiralcel OD-H column (hexane/2-propanol=90/10, 1 mL/min, 210 nm).  $t_R$  18.3 min (*S*);  $t_R$  19.4 min (*R*).  $^1\text{H}$  NMR ( $\text{CDCl}_3$ ),  $\delta$ : 1.97-2.05 (m, 1H), 2.23-2.27 (m, 1H), 2.75 (dd, 1H,  $J=9.5$  Hz,  $J=13.4$  Hz), 2.81-2.89 (m, 1H), 3.26 (dd, 1H,  $J=3.5$  Hz,  $J=13.4$  Hz), 4.12-4.26 (m, 2H), 7.19-7.33 (m, 5H).

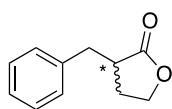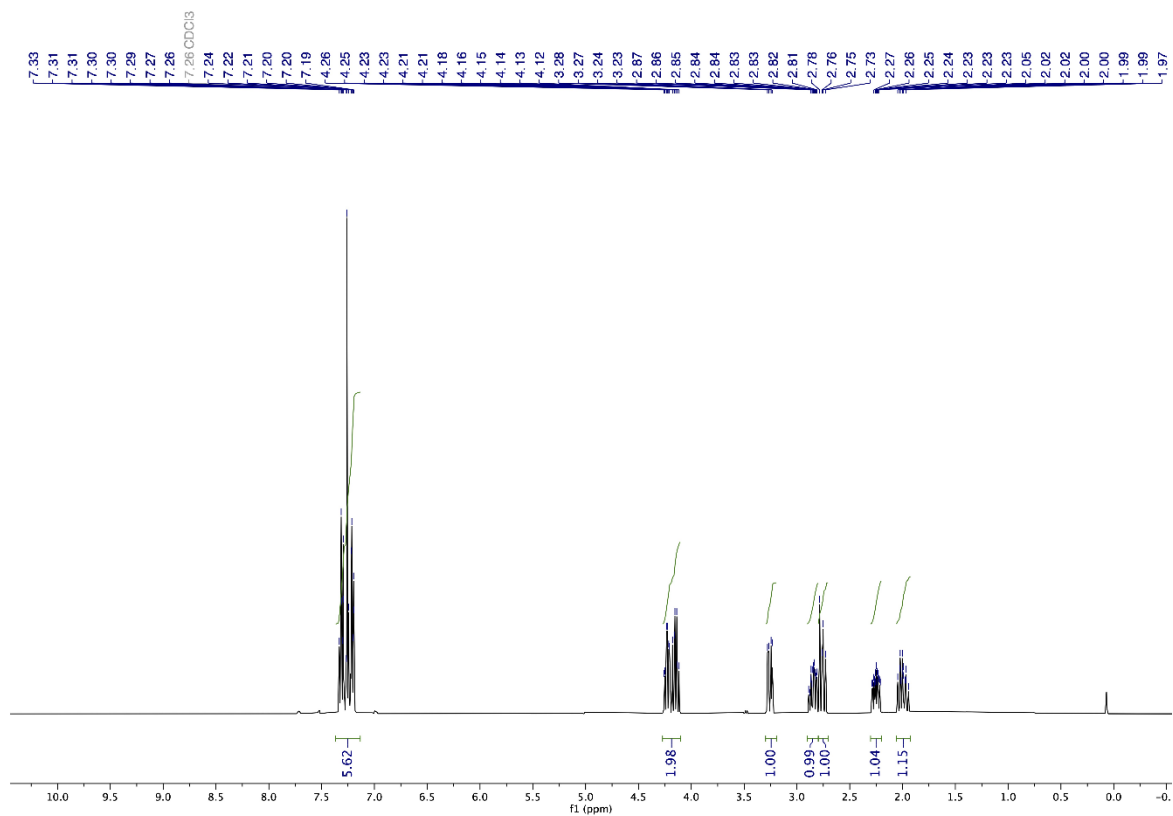

**Figure S118.**  $^1\text{H}$  NMR spectrum of 3-benzylidihydrofuran-2(3*H*)-one (from S57) in  $\text{CDCl}_3$ .

(a)

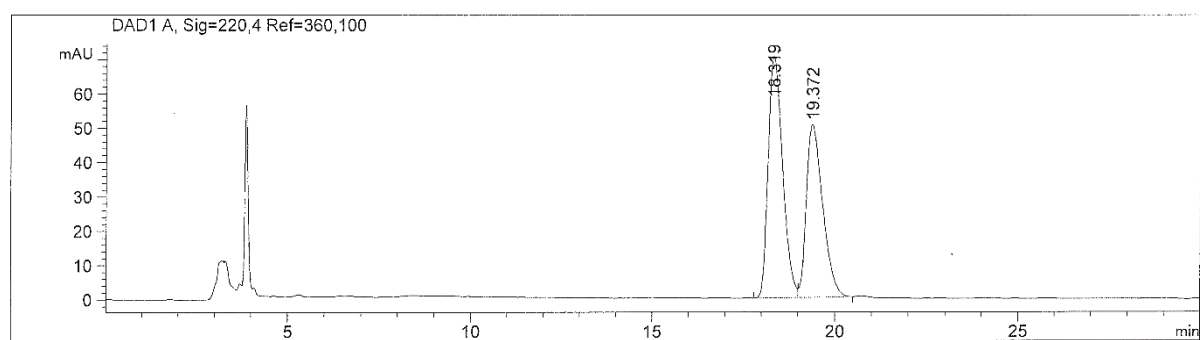

(b)

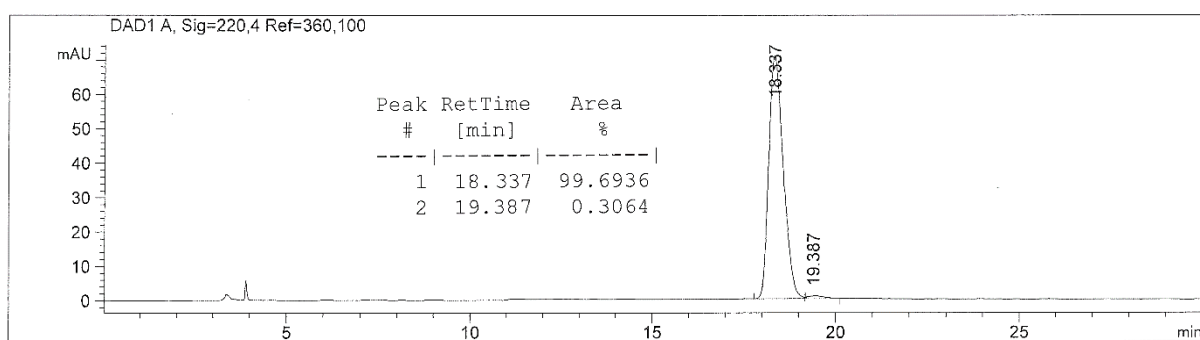

**Figure S119.** HPLC trace of: (a) racemic and (b) enantioenriched product (99% (*S*) ee using **4a** catalytic system; Scheme 4).

**3-(4-Methoxybenzyl)dihydrofuran-2(3H)-one (from S58).**<sup>32</sup> Enantiomeric excess determined by

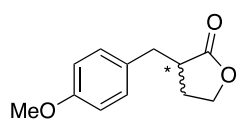

HPLC using Chiracel OD-H column (hexane/2-propanol=90/10, 1 mL/min, 210

nm).  $t_R$  11.8 min (*S*);  $t_R$  12.7 min (*R*). <sup>1</sup>H NMR (CDCl<sub>3</sub>),  $\delta$ : 1.98-2.05 (m, 1H),

2.23-2.27 (m, 1H), 2.73-2.83 (m, 2H), 3.15-3.19 (m, 1H), 3.80 (s, 3H), 4.13-4.24

(m, 2H), 6.85 (d, 2H,  $J=8.4$  Hz), 7.13 (d, 2H,  $J=8.4$  Hz).

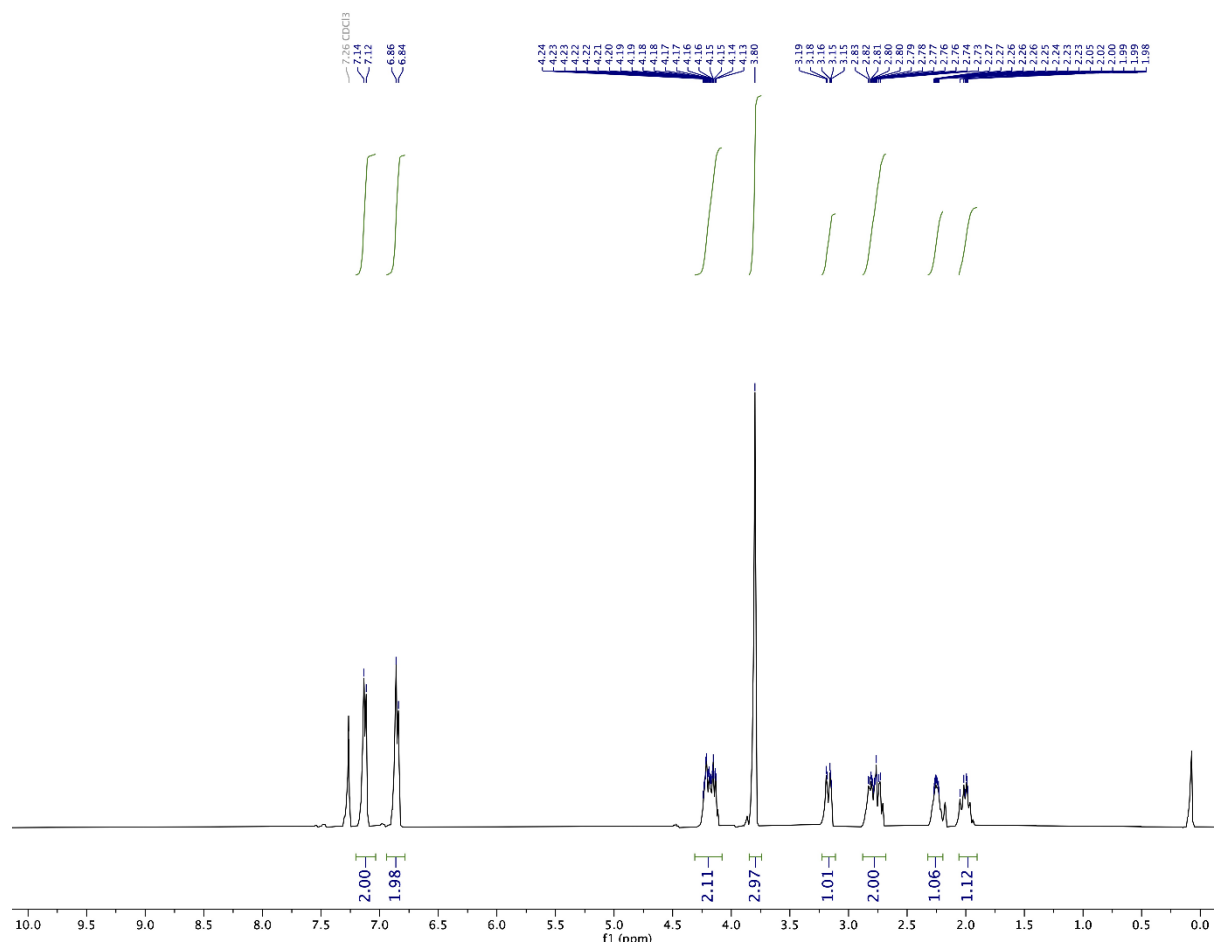

**Figure S120.** <sup>1</sup>H NMR spectrum of 3-(4-methoxybenzyl)dihydrofuran-2(3H)-one (from S58) in CDCl<sub>3</sub>.

(a)

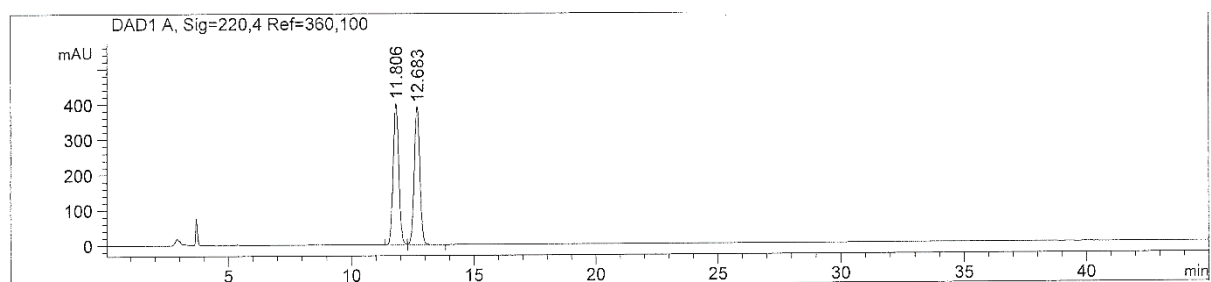

(b)

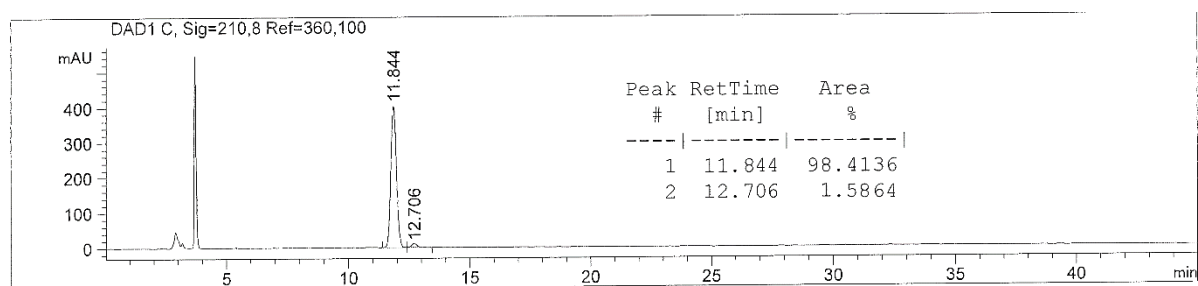

**Figure S121.** HPLC trace of enantioenriched product (97% (*S*) ee using **4a** catalytic system; Scheme 4).



**3-(4-(Trifluoromethyl)benzyl)dihydrofuran-2(3H)-one (from S59).** Enantiomeric excess determined

by HPLC using Chiracel OD-H column (hexane/2-propanol=90/10, 1 mL/min, 210 nm).  $t_R$  9.6 min (*S*);  $t_R$  10.4 min (*R*).  $^1\text{H}$  NMR ( $\text{CDCl}_3$ ),  $\delta$ : 1.92-2.02 (m, 1H), 2.21-2.29 (m, 1H), 2.74-2.86 (m, 2H), 3.17-3.22 (m, 1H), 4.12-4.26 (m, 2H), 6.97-7.02 (m, 2H), 7.15-7.18 (m, 2H).  $^{13}\text{C}$  NMR ( $\text{CDCl}_3$ ),  $\delta$ : 28.2, 35.3, 41.3, 66.7, 115.7 (d,  $J=21.3$  Hz), 130.5 (d,  $J=7.9$  Hz), 134.1 (d,  $J=3.3$  Hz), 160.7, 163.1, 178.7. HRMS-EI calculated for  $\text{C}_{12}\text{H}_{11}\text{F}_3\text{O}_2$   $[\text{M}+\text{Na}]^+$ : 267.0609, found: 267.0605.

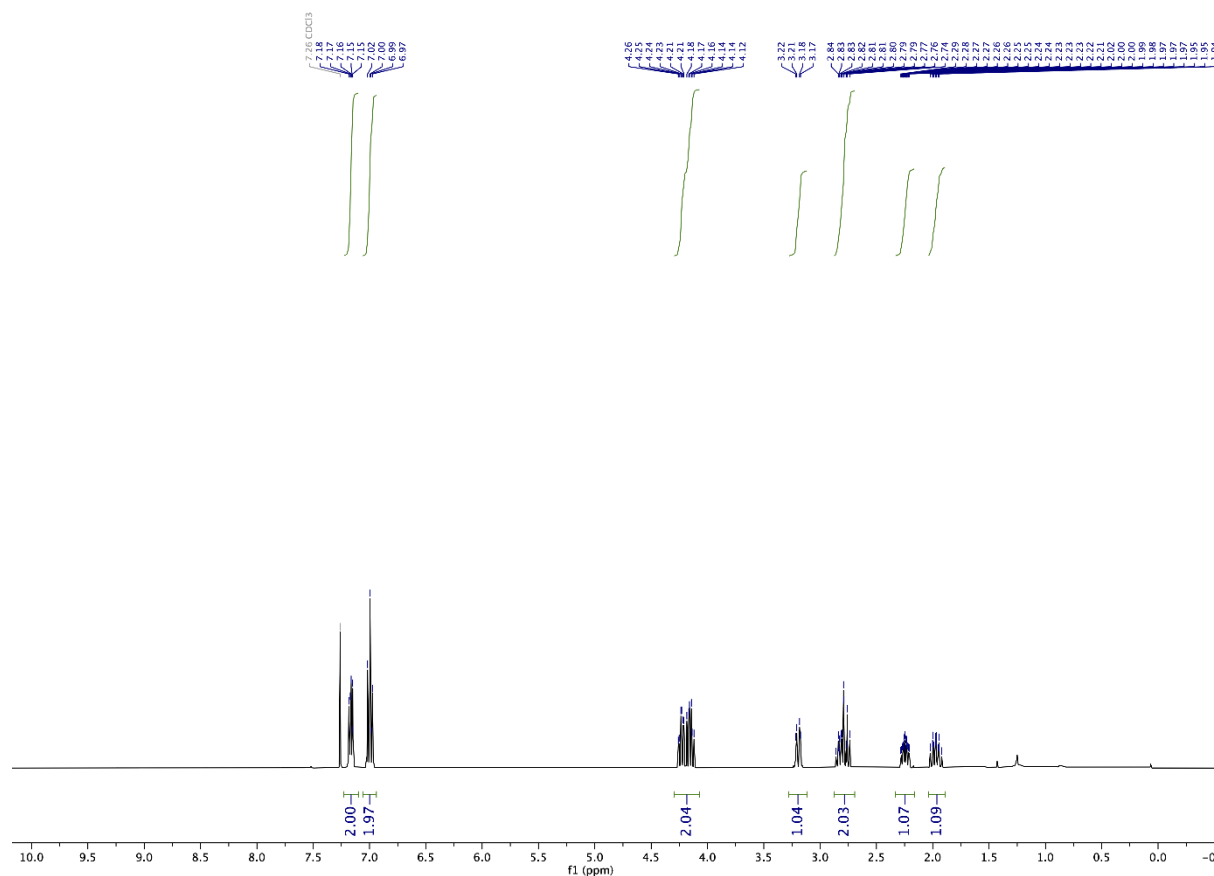

**Figure S122.**  $^1\text{H}$  NMR spectrum of 3-(4-(trifluoromethyl)benzyl)dihydrofuran-2(3H)-one (from S59) in  $\text{CDCl}_3$ .

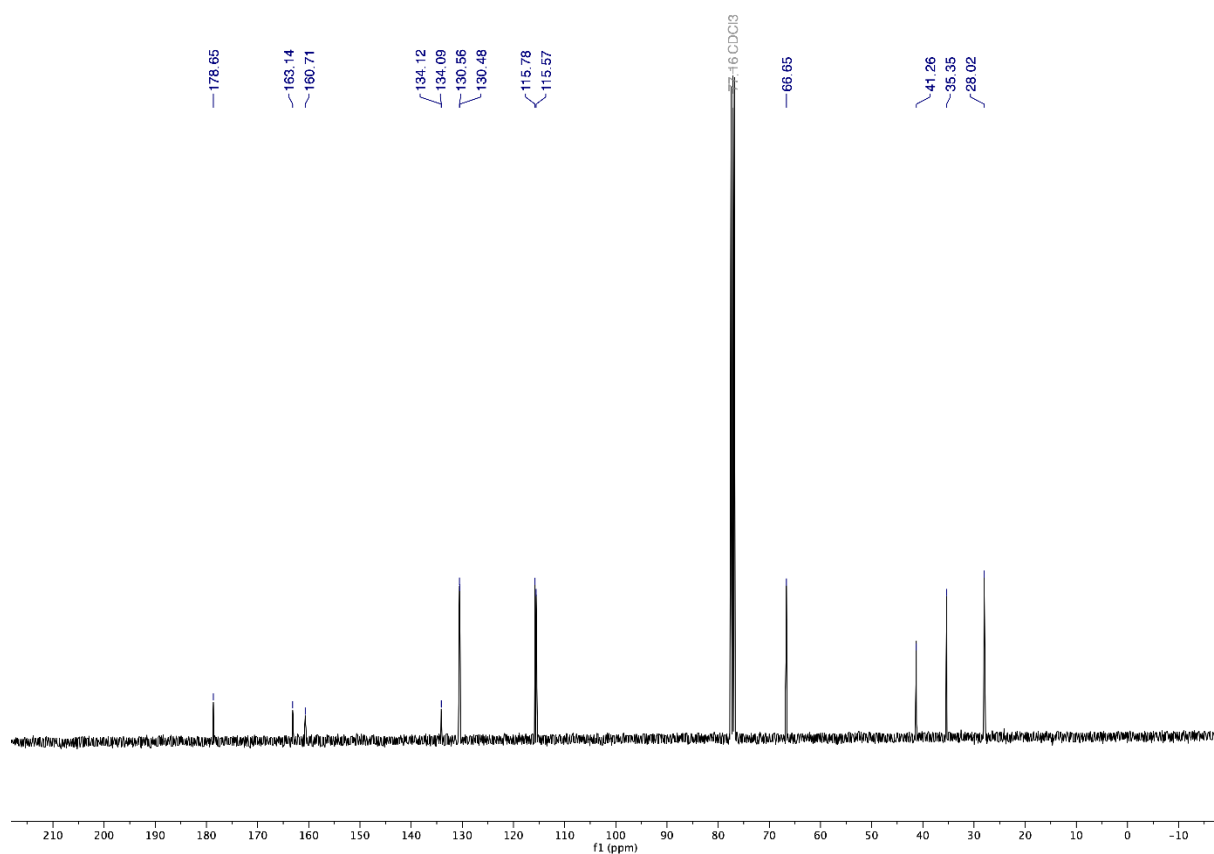

**Figure S123.**  $^{13}\text{C}$  NMR spectrum of 3-(4-(trifluoromethyl)benzyl)dihydrofuran-2(3*H*)-one (from **S59**) in  $\text{CDCl}_3$ .

(a)

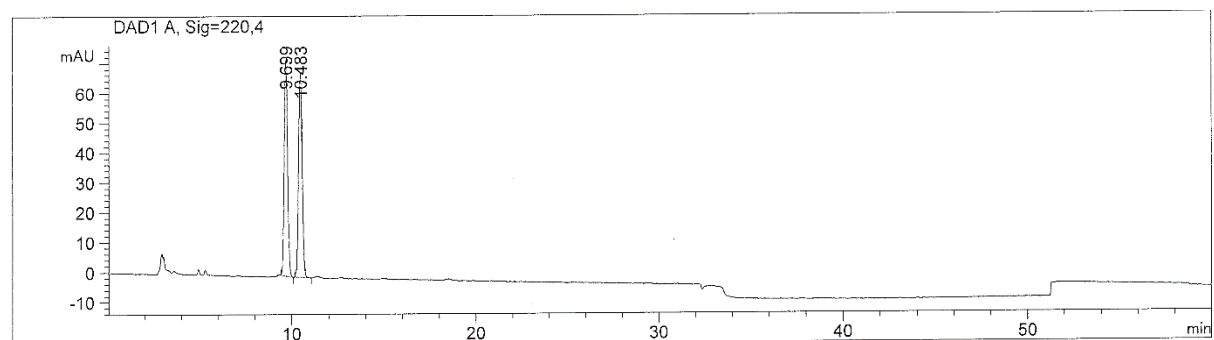

(b)

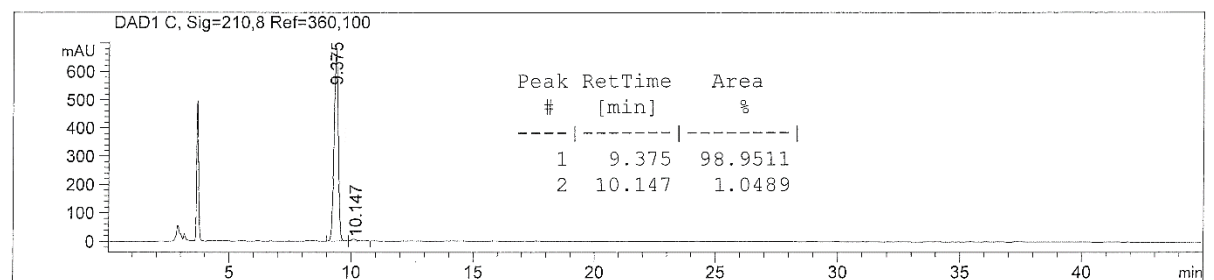

**Figure S124.** HPLC traces of (a) racemic and (b) enantioenriched product (98% (*S*) ee using **4a** catalytic system; Scheme 4).

**1-Acetyl-3-benzylpiperidin-2-one (from S60).**<sup>34</sup> Enantiomeric excess determined by HPLC using

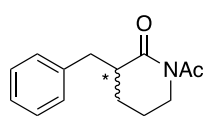

Chiracel OJ-H column (hexane/2-propanol=80/20, 0.5 mL/min, 210 nm).  $t_R$  21.5

min (*S*);  $t_R$  23.6 min (*R*).  $^1\text{H}$  NMR ( $\text{CDCl}_3$ ),  $\delta$ : 1.45-1.53 (m, 1H), 1.68-1.76 (m,

1H), 1.81-1.90 (m, 2H), 2.54 (s, 3H), 2.65-2.75 (m, 2H), 3.35-3.39 (m, 1H), 3.59-

3.64 (m, 1H), 3.81-3.88 (m, 1H), 7.19-7.33 (m, 5H).

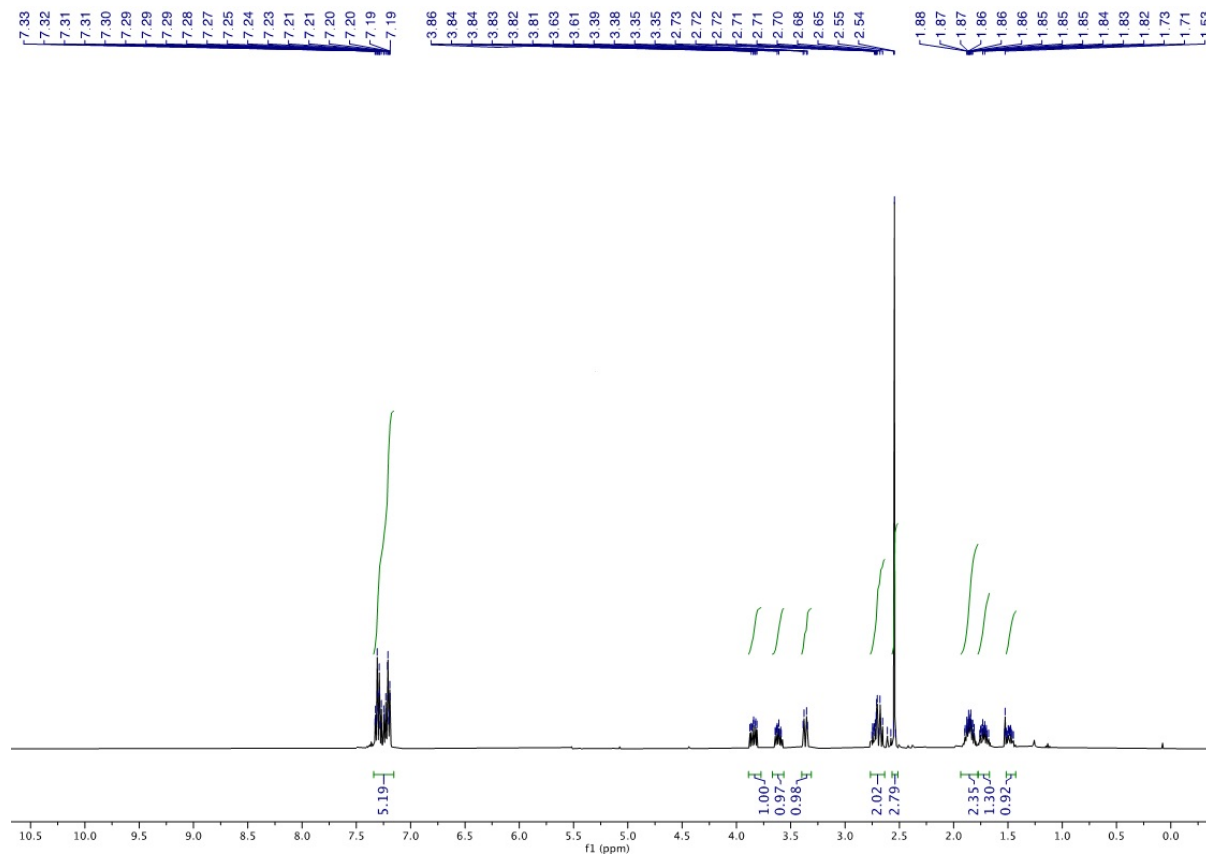

**Figure S125.**  $^1\text{H}$  NMR spectrum of 1-acetyl-3-benzylpiperidin-2-one (from S60) in  $\text{CDCl}_3$ .

(a)

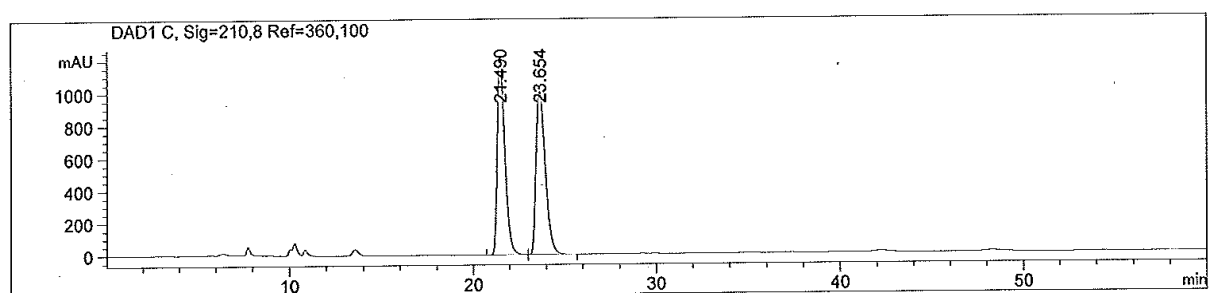

(b)

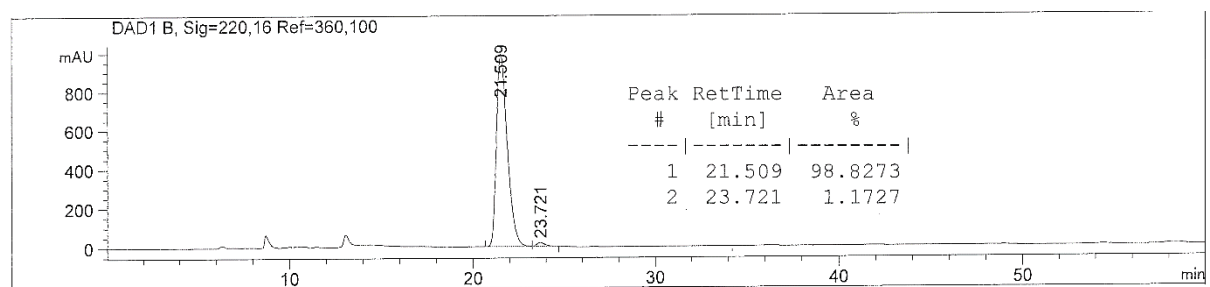

**Figure S126.** HPLC trace of: (a) racemic and (b) enantioenriched product (98% (*S*) ee using **4a** catalytic system; Scheme 4).

**1,3-Dibenzylpiperidin-2-one (from S61).**<sup>34</sup> Enantiomeric excess determined by HPLC using Chiracel

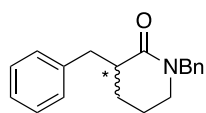

OJ-H column (hexane/2-propanol=80/20, 0.5 mL/min, 220 nm).  $t_R$  14.1 min (-);  $t_R$

21.0 min (+).  $^1\text{H NMR}$  ( $\text{CDCl}_3$ ),  $\delta$ : 1.47-1.53 (m, 1H), 1.64-1.69 (m, 1H), 1.72-

1.82 (m, 2H), 2.65-2.70 (m, 1H), 2.76 (dd, 1H,  $J=13.2$  Hz,  $J=10$  Hz), 3.17-3.20

(m, 2H), 3.45 (dd, 1H,  $J=13.2$  Hz,  $J=3.6$  Hz), 4.63 (m, 2H), 7.22-7.35 (m, 10H).

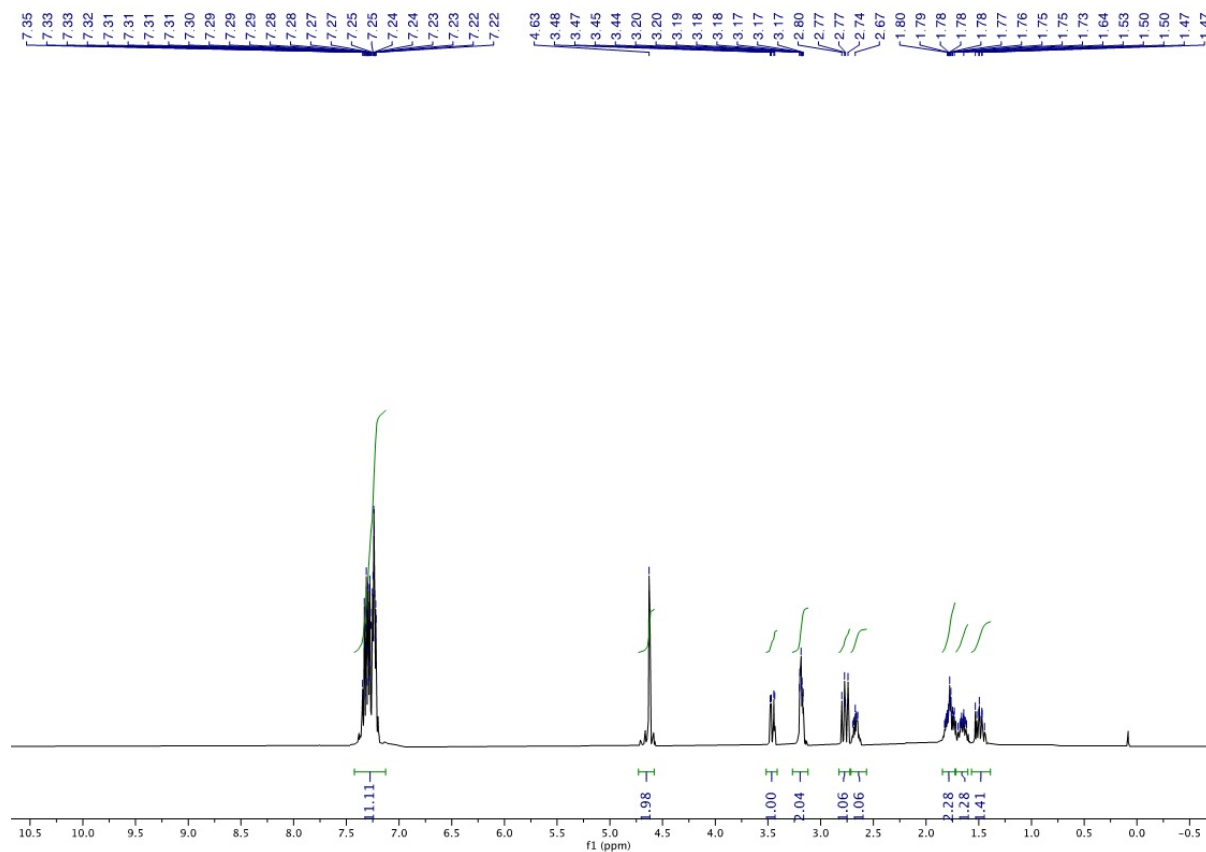

**Figure S127.**  $^1\text{H NMR}$  spectrum of 1,3-dibenzylpiperidin-2-one (from S61) in  $\text{CDCl}_3$ .

(a)

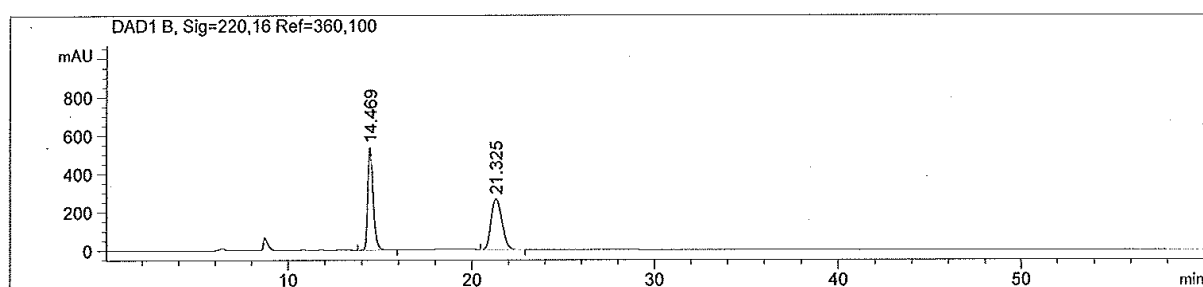

(b)

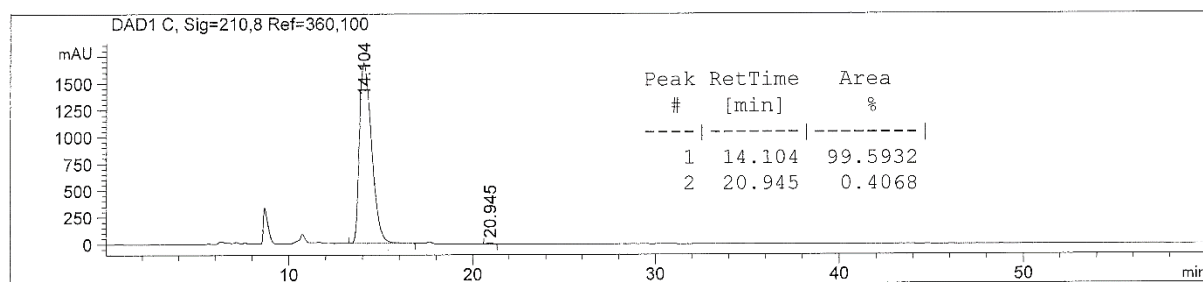

**Figure S128.** HPLC trace of: (a) racemic and (b) enantioenriched product (99% (*S*) ee using **4a** catalytic system; Scheme 4).

**tert-Butyl 3-benzyl-2-oxopiperidine-1-carboxylate (from S62).**<sup>34</sup> Enantiomeric excess determined by

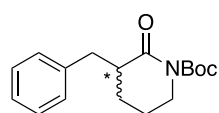

HPLC using Chiracel IA column (hexane/2-propanol=90/10, 0.5 mL/min, 220 nm).  $t_R$  11.8 min (*S*);  $t_R$  12.6 min (*R*).  $^1\text{H NMR}$  ( $\text{CDCl}_3$ ),  $\delta$ : 1.54 (s, 9H), 1.80-1.82 (m, 3H), 2.61-2.65 (m, 2H), 3.40-3.48 (m, 2H), 3.57-3.60 (m, 1H), 3.68-3.71 (m, 1H), 7.13-7.31 (m, 5H).

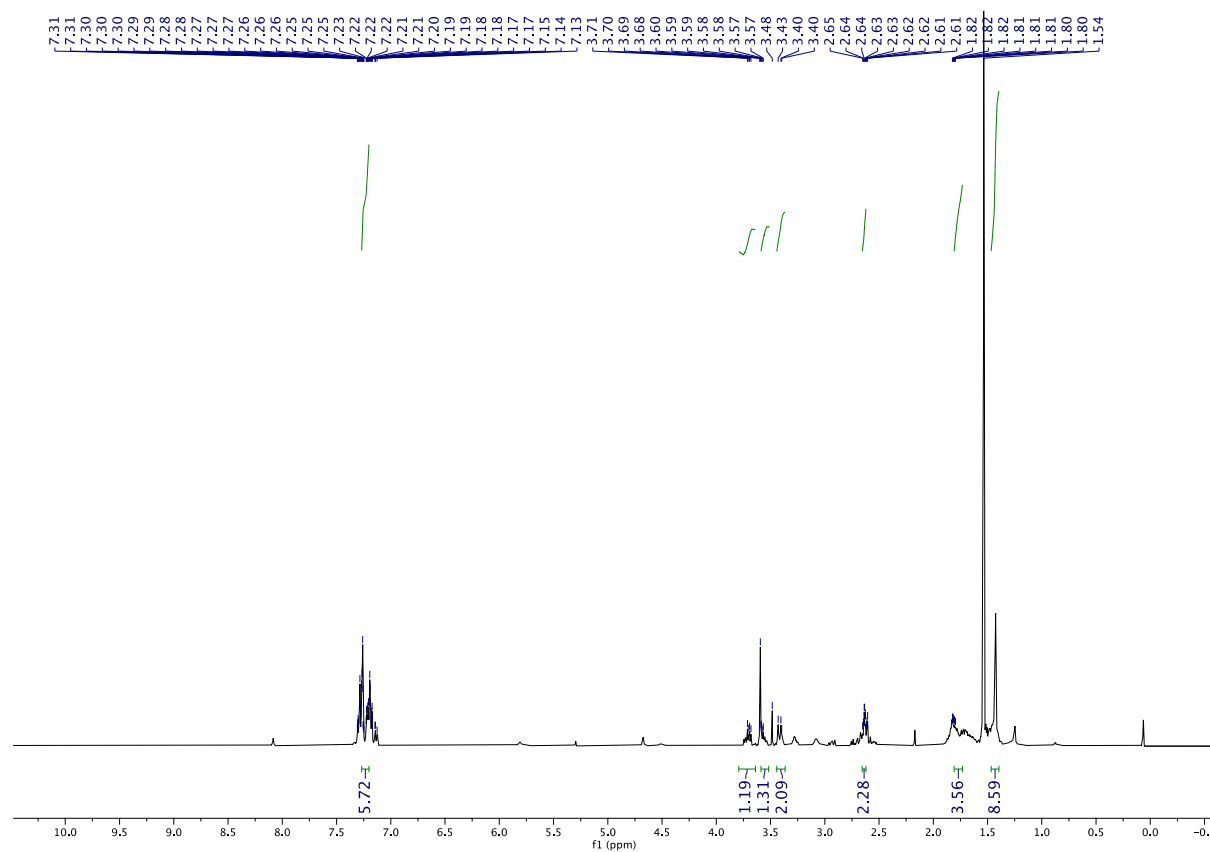

**Figure S129.**  $^1\text{H NMR}$  spectrum of tert-butyl 3-benzyl-2-oxopiperidine-1-carboxylate (from S62) in  $\text{CDCl}_3$ . The signal at 1.5 ppm corresponds to water in the  $\text{CDCl}_3$  and the minor signals correspond to the hydrogenated deprotected lactam.

(a)

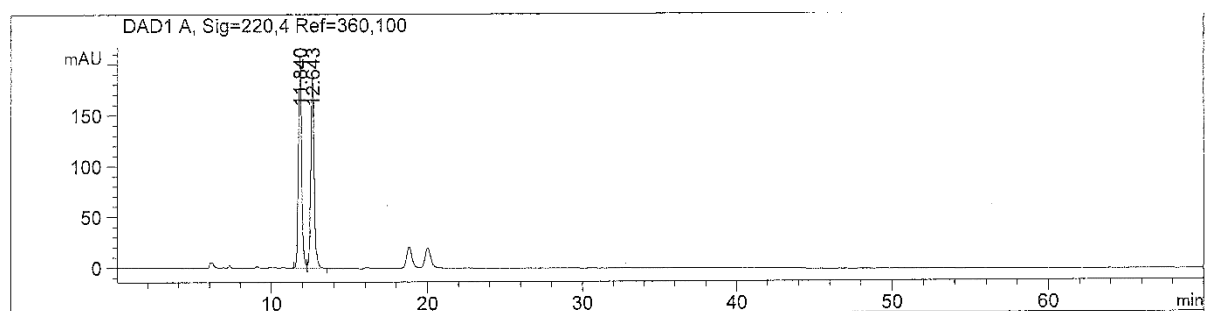

(b)

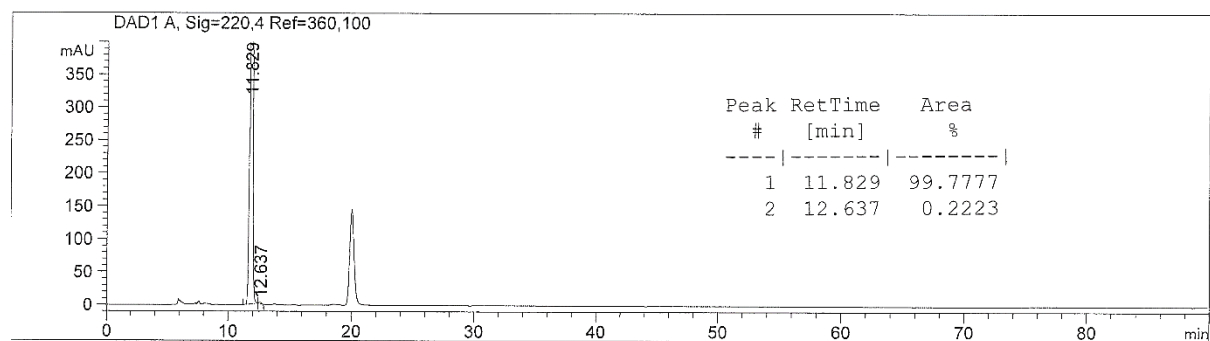

**Figure S130.** HPLC trace of: (a) racemic and (b) enantioenriched product (>99% (*S*) ee using **4a** catalytic system; Scheme 4). The signals at ca 20 min correspond to the hydrogenated deprotected lactam.



**1-Benzyl-3-(4-methoxybenzyl)piperidin-2-one (from S63).**<sup>33</sup> Enantiomeric excess determined by

HPLC using Chiralcel IA column (hexane/2-propanol=95/5, 0.5 mL/min, 210 nm).  $t_R$  51.9 min (*S*);  $t_R$  60.8 min (*R*).  $^1\text{H NMR}$  ( $\text{CDCl}_3$ ),  $\delta$ : 1.43-1.51 (m, 1H), 1.61-1.66 (m, 1H), 1.72-1.78 (m, 2H), 2.59-2.63 (m, 1H), 2.75 (dd, 1H,  $J=13.6$  Hz,  $J=9.7$  Hz), 3.14-3.18 (m, 2H), 3.34 (dd, 1H,  $J=13.6$  Hz,  $J=3.9$  Hz), 3.79 (s, 3H), 4.58 (d, 1H,  $J=14.6$  Hz), 4.64 (d, 1H,  $J=14.6$  Hz), 6.80-6.84 (m, 2H), 7.12-7.14 (m, 2H), 7.21-7.33 (m, 5H).

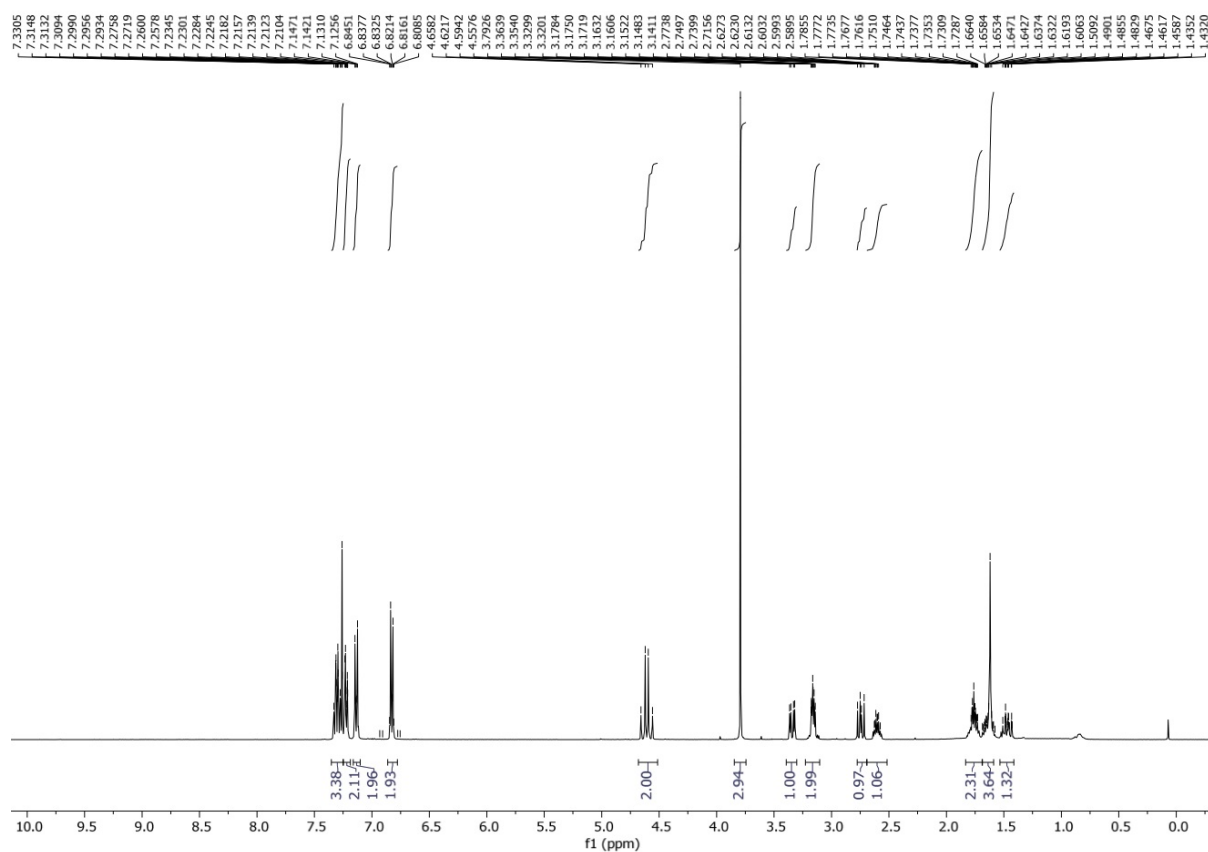

**Figure S131.**  $^1\text{H NMR}$  spectrum of 1-benzyl-3-(4-methoxybenzyl)piperidin-2-one (from S63) in  $\text{CDCl}_3$  (signal at 1.51 ppm corresponds to water).

(a)

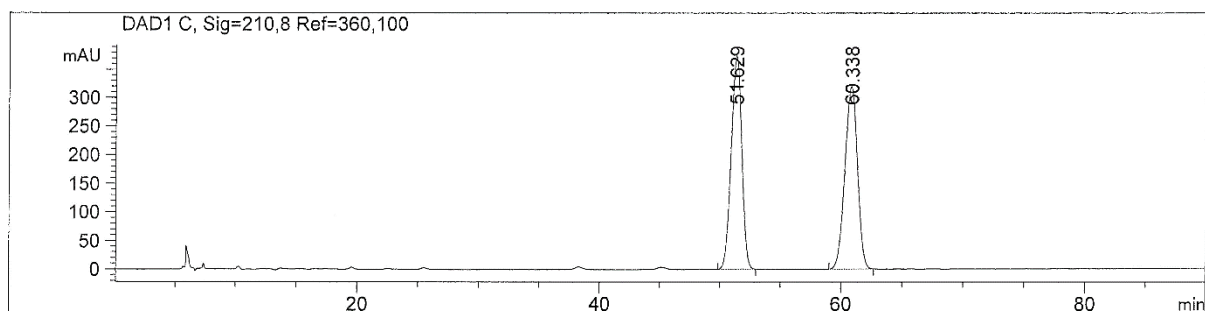

(b)

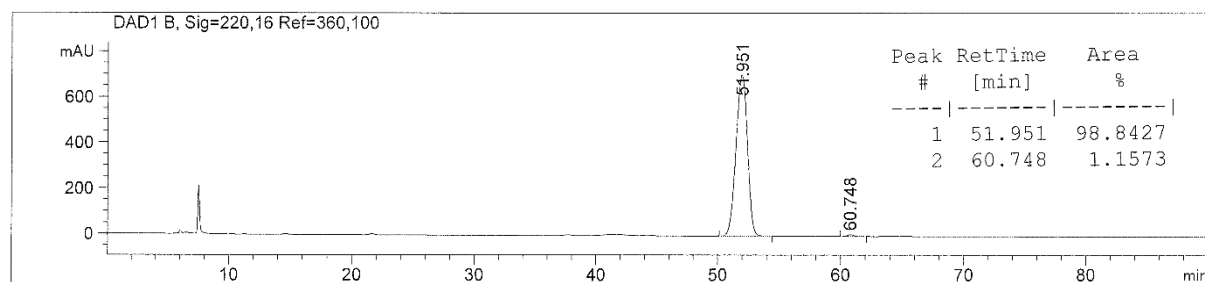

**Figure S132.** HPLC trace of: (a) racemic and (b) enantioenriched product (98% (*S*) ee using **4a** catalytic system; Scheme 4).

**1-Benzyl-3-(4-bromobenzyl)piperidin-2-one (from S64).**<sup>33</sup> Enantiomeric excess determined by HPLC

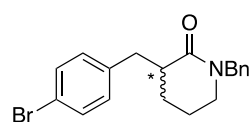

using Chiralcel IA column (hexane/2-propanol=95/5, 0.5 mL/min, 210 nm).  $t_R$  39.4 min (*S*);  $t_R$  48.5 min (*R*).  $^1H$  NMR ( $CDCl_3$ ),  $\delta$ : 1.41-1.48 (m, 1H), 1.62-1.68 (m, 1H), 1.73-1.80 (m, 2H), 2.59-2.64 (m, 1H), 2.81 (dd, 1H,  $J=13.6$  Hz,  $J=9.3$  Hz), 3.14-3.18 (m, 2H), 3.32 (dd, 1H,  $J=13.6$  Hz,  $J=4.1$  Hz), 4.57 (d, 1H,  $J=14.6$  Hz), 4.63 (d, 1H,  $J=14.6$  Hz), 7.09-7.11 (m, 2H), 7.19-7.21 (m, 3H), 7.26-7.32 (m, 2H), 7.40 (d, 2H,  $J=8.4$  Hz).

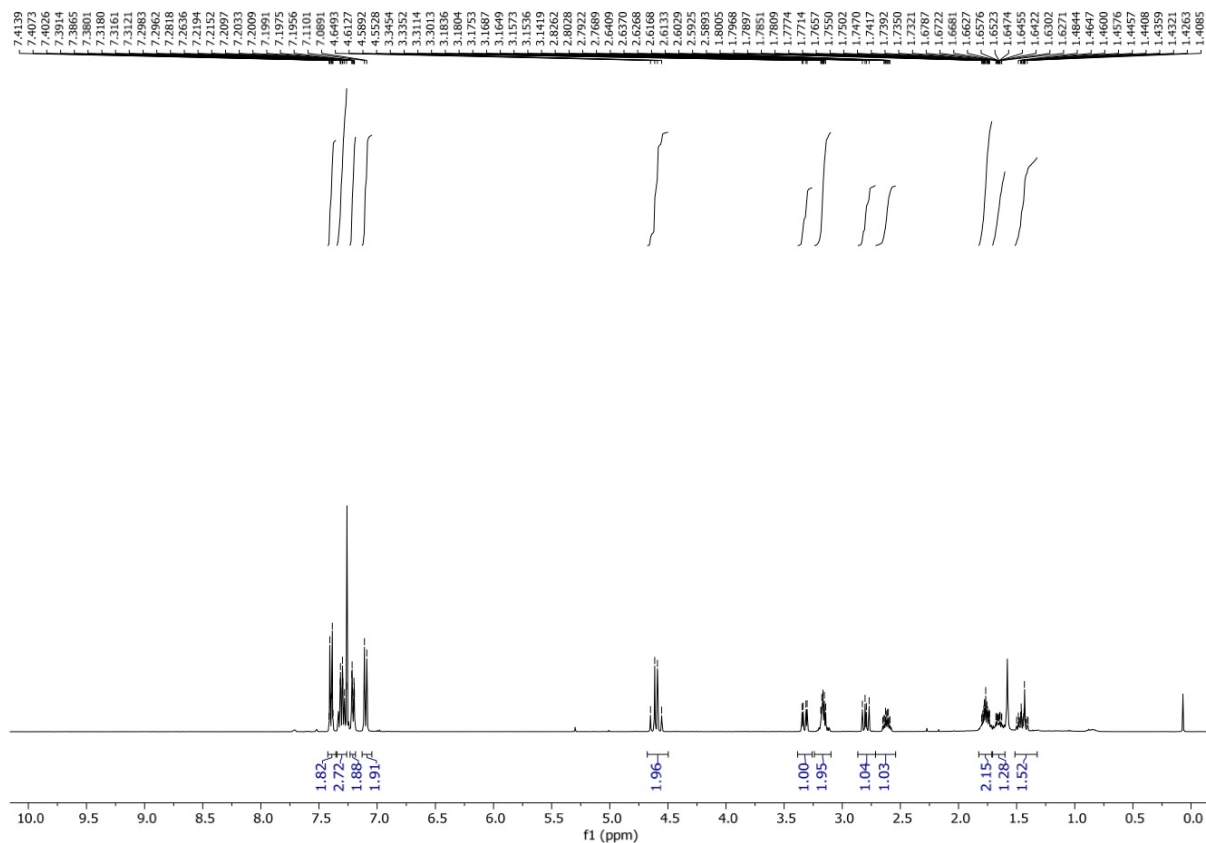

**Figure S133.**  $^1H$  NMR spectrum of 1-benzyl-3-(4-bromobenzyl)piperidin-2-one (from S64) in  $CDCl_3$ .

(a)

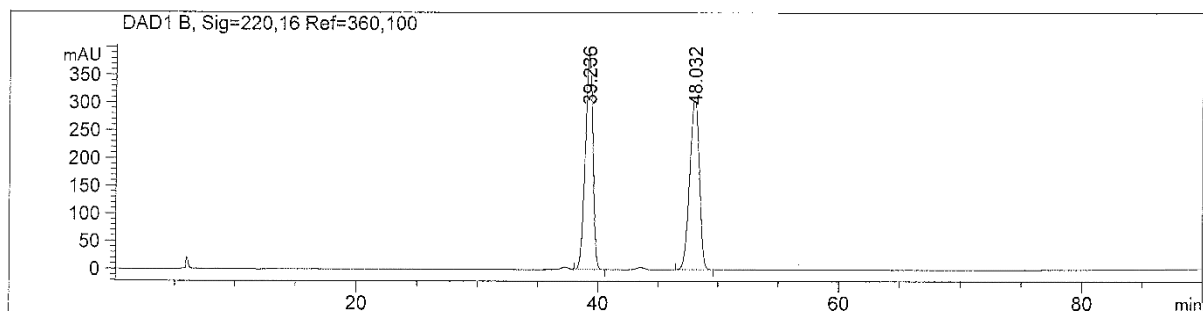

(b)

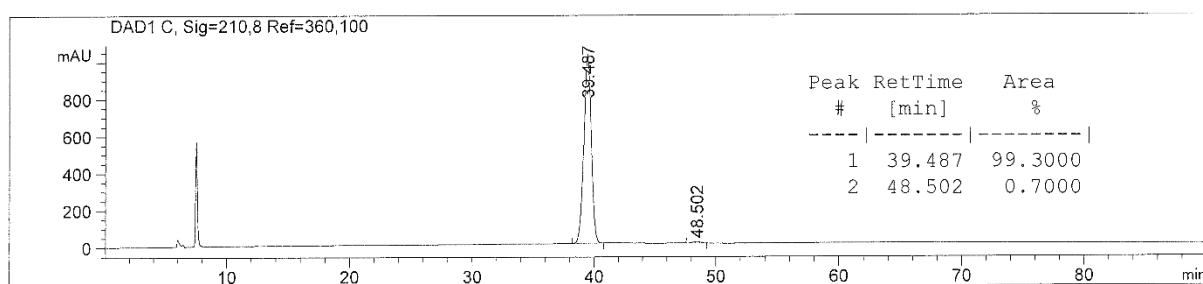

**Figure S134.** HPLC trace of: (a) racemic and (b) enantioenriched product (99% (*S*) ee using **4a** catalytic system; Scheme 4).

**1-Benzyl-3-(3-methoxybenzyl)piperidin-2-one (from S65).**<sup>33</sup> Enantiomeric excess determined by HPLC using Chiracel IA column (hexane/2-propanol=95/5, 0.5 mL/min, 210 nm).  $t_R$  49.2 min (*S*);  $t_R$  61.3 min (*R*). <sup>1</sup>H NMR (CDCl<sub>3</sub>),  $\delta$ : 1.43-1.51 (m, 1H), 1.63-1.65 (m, 2H), 1.73-1.79 (m, 1H), 2.63-2.65 (m, 1H), 2.73 (dd, 1H,  $J=13.2$  Hz,  $J=10.1$  Hz), 3.15-3.19 (m, 2H), 3.42-3.46 (m, 1H), 3.79 (s, 3H), 4.62 (s, 2H), 6.74-6.82 (m, 3H), 7.18-7.25 (m, 3H), 7.27-7.34 (m, 2H).

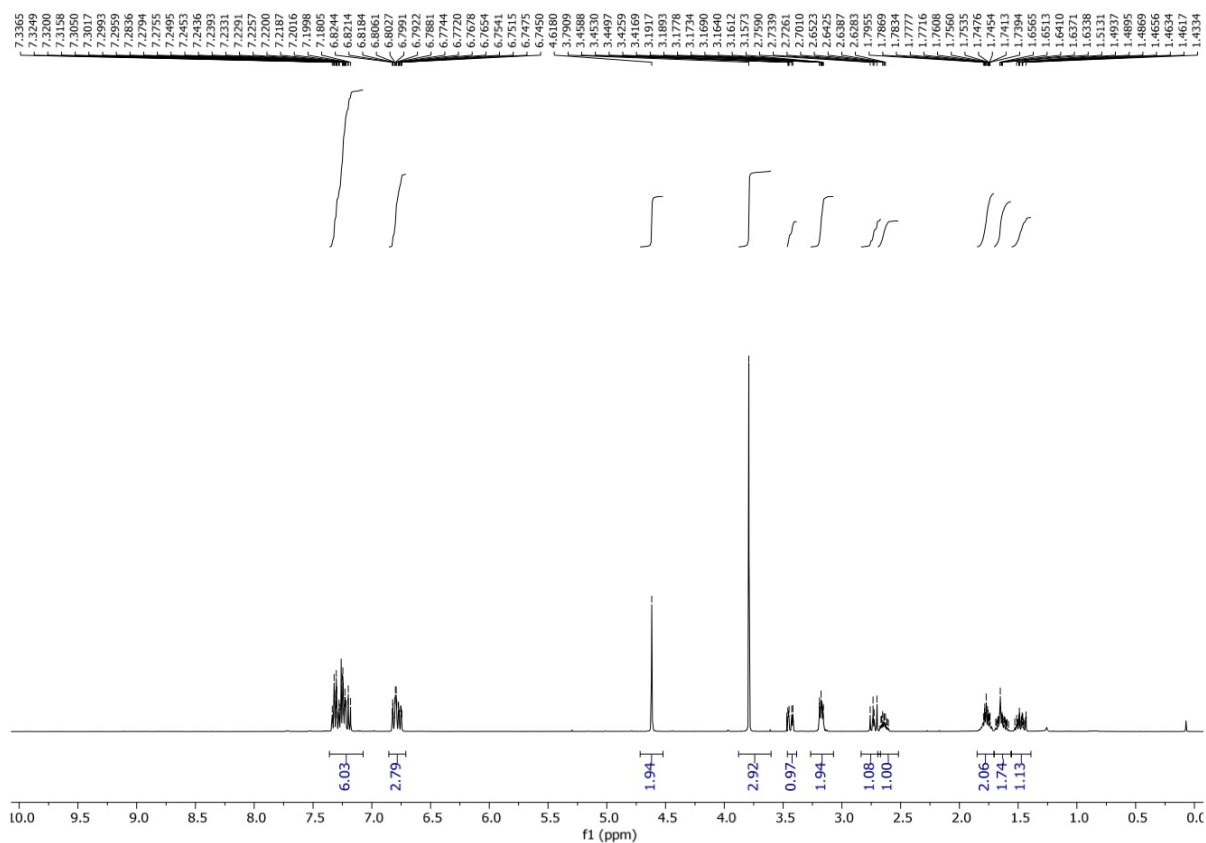

**Figure S135.** <sup>1</sup>H NMR spectrum of 1-benzyl-3-(3-methoxybenzyl)piperidin-2-one (from S65) in CDCl<sub>3</sub>.

(a)

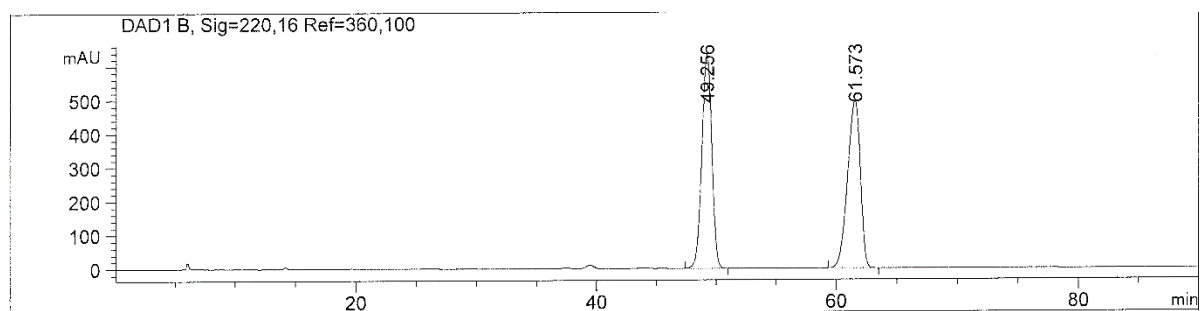

(b)

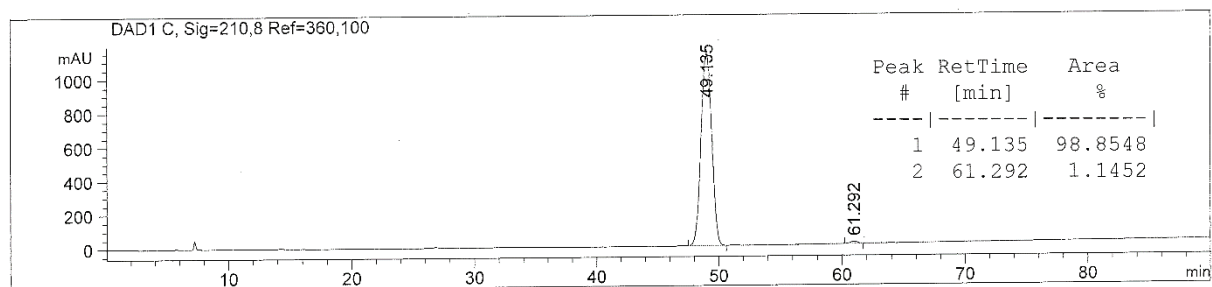

**Figure S136.** HPLC trace of enantioenriched product (98% (*S*) ee using **4a** catalytic system; Scheme 4).

**1-Benzyl-3-(2-methoxybenzyl)piperidin-2-one (from S66).**<sup>33</sup> Enantiomeric excess determined by

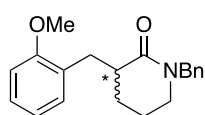

HPLC using Chiracel IA column (hexane/2-propanol=95/5, 0.5 mL/min, 210 nm).

$t_R$  53.6 min (*S*);  $t_R$  76.9 min (*R*). <sup>1</sup>H NMR (CDCl<sub>3</sub>),  $\delta$ : 1.43-1.47 (m, 1H), 1.59-1.67

(m, 2H), 1.79-1.83 (m, 1H), 2.70-2.74 (m, 2H), 3.18 (dd, 2H,  $J=7.2$  Hz,  $J=5.1$  Hz),

3.53 (d, 1H,  $J=9.2$  Hz), 3.82 (s, 3H), 4.59 (d, 1H,  $J=14.6$  Hz), 4.65 (d, 1H,  $J=14.6$  Hz), 6.84-6.90 (m,

2H), 7.16-7.22 (m, 2H), 7.24-7.28 (m, 3H), 7.30-7.35 (m, 2H).

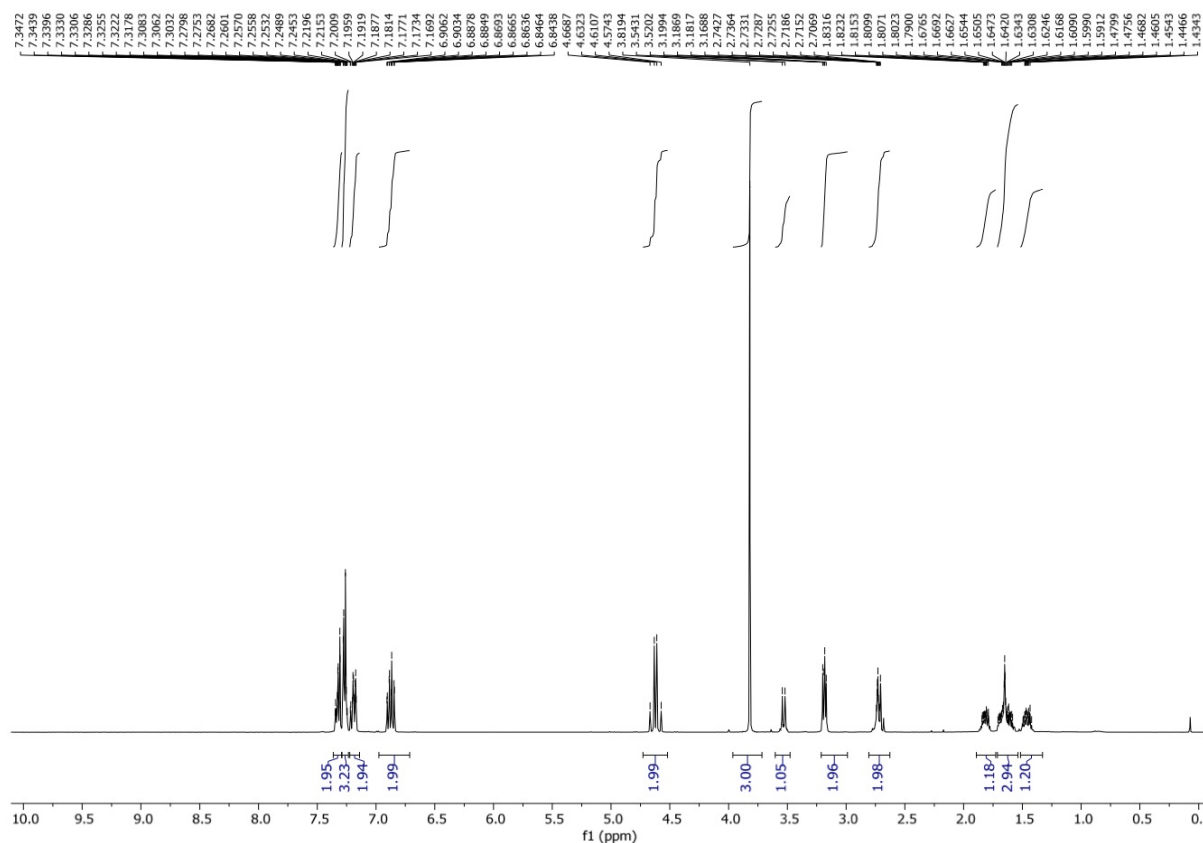

**Figure S137.** <sup>1</sup>H NMR spectrum of 1-benzyl-3-(2-methoxybenzyl)piperidin-2-one (from S66) in CDCl<sub>3</sub>.

(a)

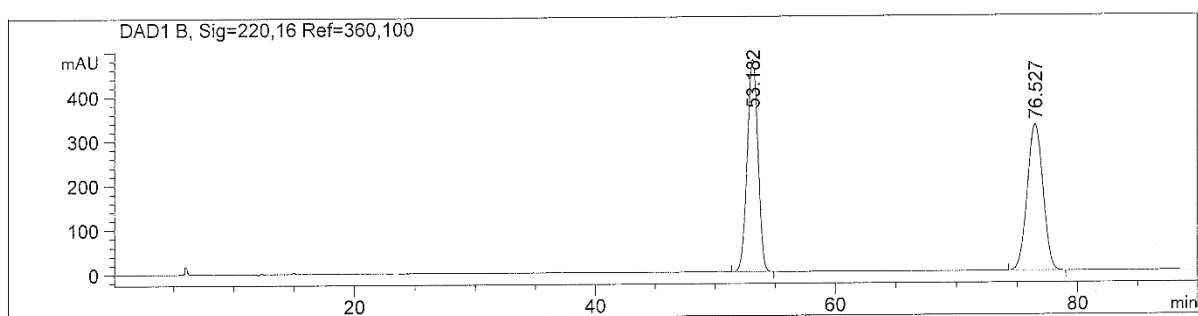

(b)

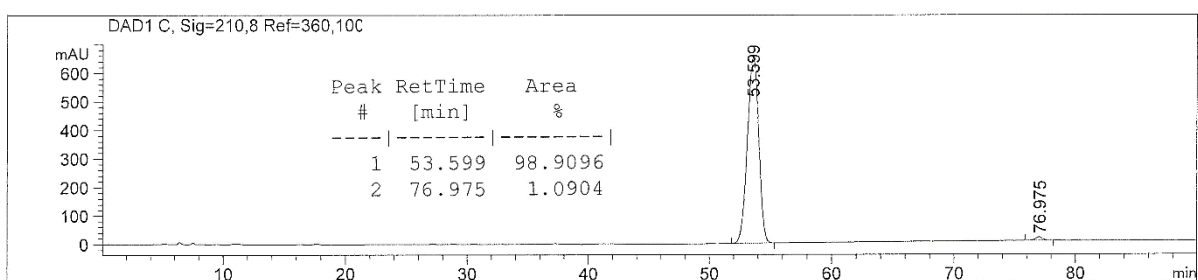

**Figure S138.** HPLC trace of: (a) racemic and (b) enantioenriched product (98% (*S*) ee using **4a** catalytic system; Scheme 4).



**1-Benzyl-3-(cyclohexylmethyl)piperidin-2-one (from S67).**<sup>46</sup> Enantiomeric excess determined by

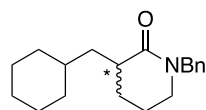

HPLC using Chiracel IA column (hexane/2-propanol=90/10, 0.5 mL/min, 210 nm).

$t_R$  16.3 min (*S*);  $t_R$  19.1 min (*R*). <sup>1</sup>H NMR (CDCl<sub>3</sub>),  $\delta$ : 0.88-1.04 (m, 2H), 1.13-1.41

(m, 5H), 1.44-1.53 (m, 1H), 1.63-1.77 (m, 6H), 1.79-1.87 (m, 1H), 1.88-1.96 (m,

2H), 2.41-2.48 (m, 1H), 3.17-3.20 (m, 2H), 4.51-4.63 (m, 2H), 7.22- 7.33 (m, 5H).

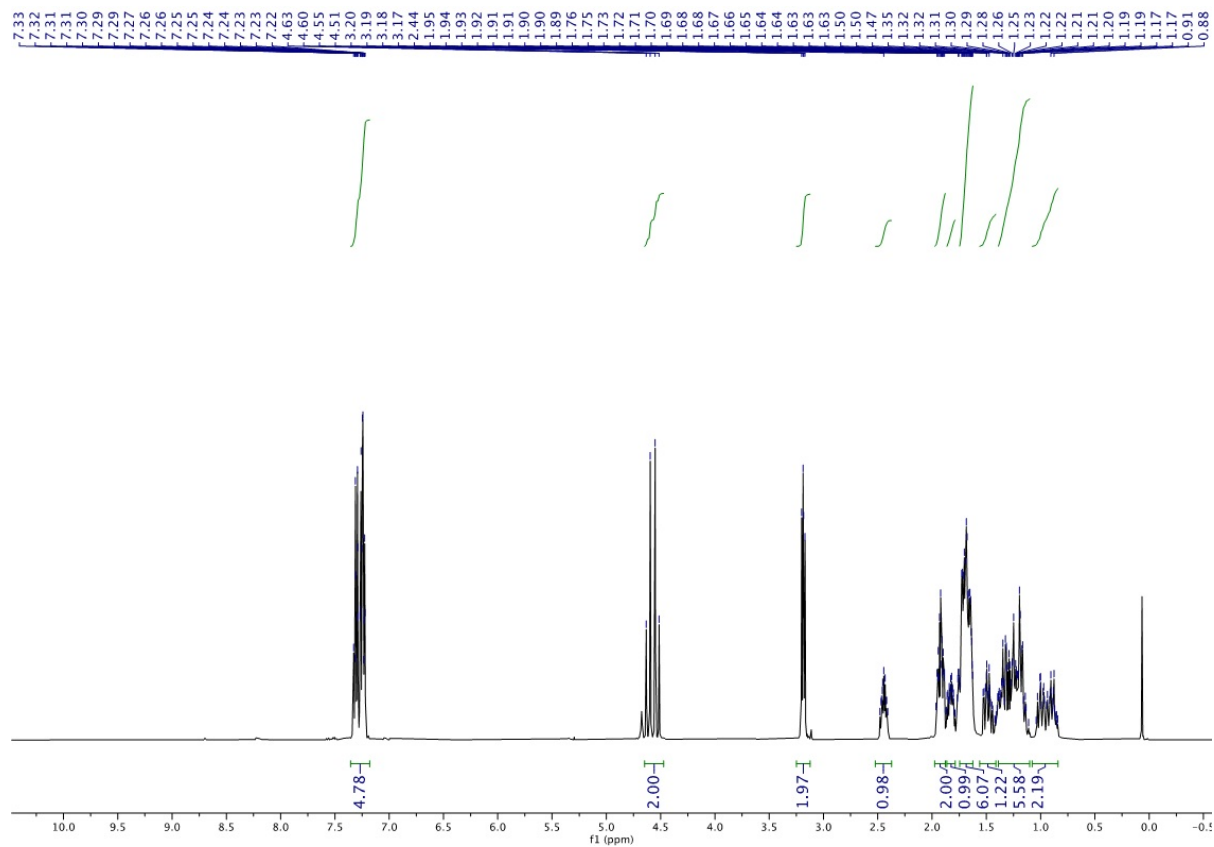

**Figure S139.** <sup>1</sup>H NMR spectrum of 1-benzyl-3-(cyclohexylmethyl)piperidin-2-one (from S67) in CDCl<sub>3</sub>.

(a)

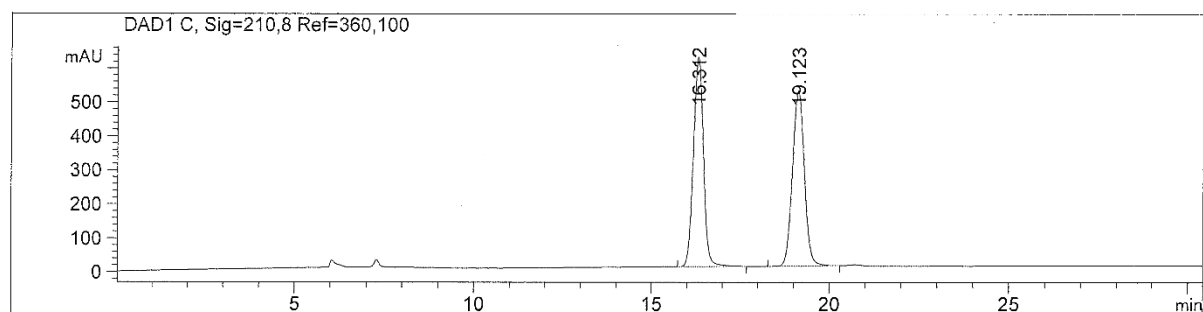

(b)

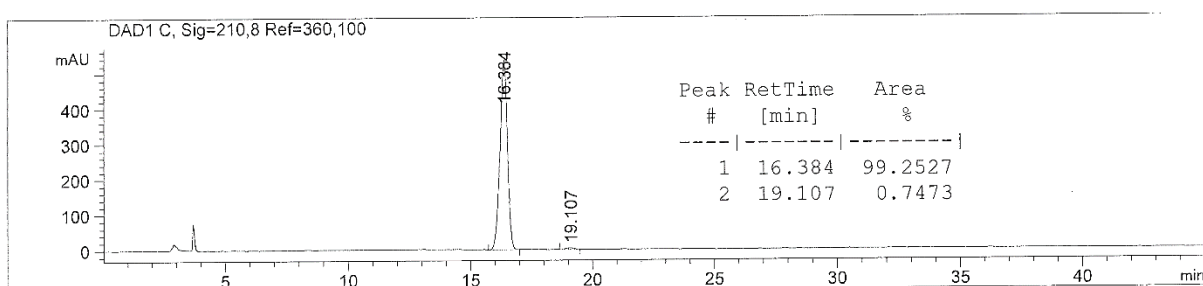

**Figure S140.** HPLC trace of: (a) racemic and (b) enantioenriched product (98% (*S*) ee using **4a** catalytic system; Scheme 4).

**1,3-Dibenzyl-1 $\lambda^4$ -pyrrolidin-2-one (from S68).**<sup>32</sup> Enantiomeric excess determined by HPLC using

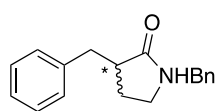

Chiracel AD column (hexane/2-propanol=90/10, 1 mL/min, 210 nm).  $t_R$  11.1 min

(*R*);  $t_R$  12.4 min (*S*).  $^1H$  NMR ( $CDCl_3$ ),  $\delta$ : 1.68-1.75 (m, 1H), 1.99-2.17 (m, 1H),

2.69-2.79 (m, 2H), 3.02-3.12 (m, 2H), 3.26 (dd, 1H,  $J=2.8$  Hz,  $J=12.8$  Hz), 4.45

(m, 2H), 7.18-7.32 (m, 10H).

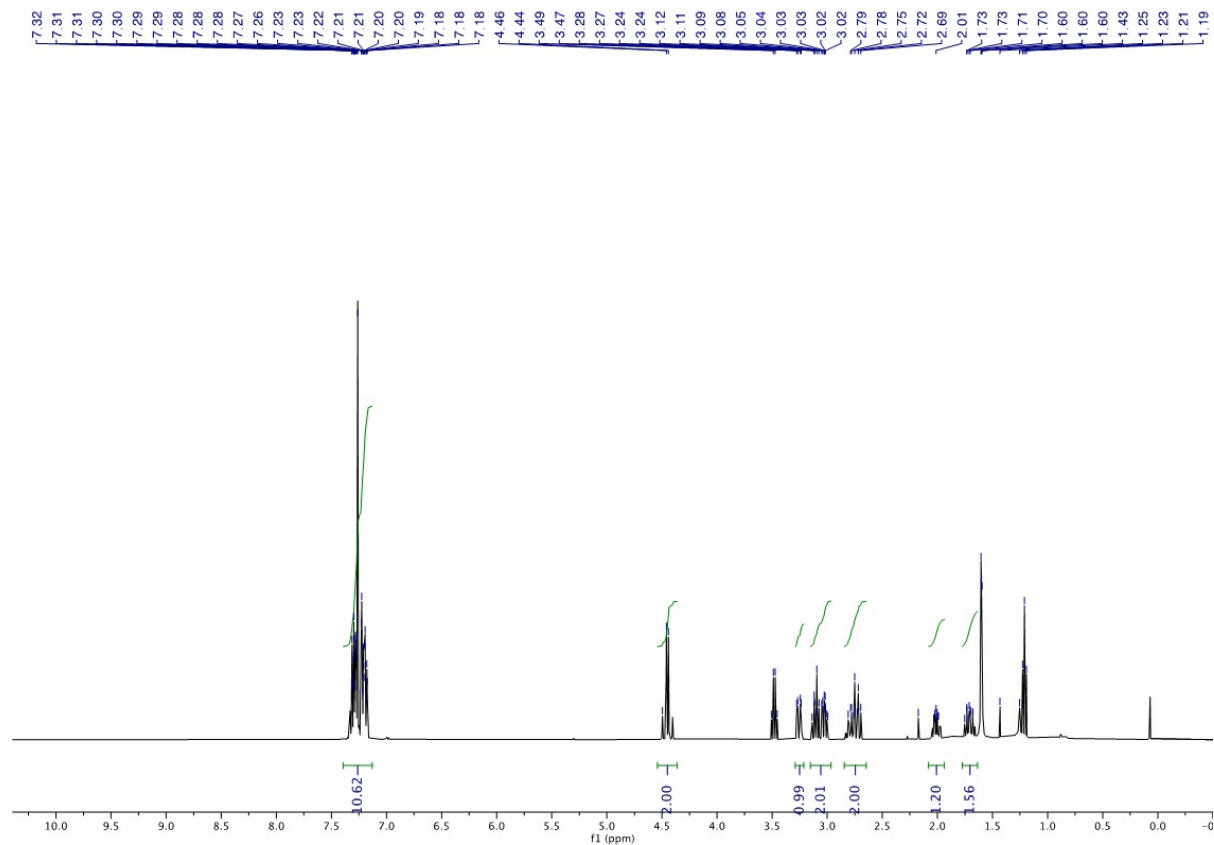

**Figure S141.**  $^1H$  NMR spectrum of 1,3-dibenzyl-1 $\lambda^4$ -pyrrolidin-2-one (from S68) in  $CDCl_3$  (signal at 1.60 ppm corresponds to water and signals at 1.21 and 3.47 ppm correspond to diethyl ether).

(a)

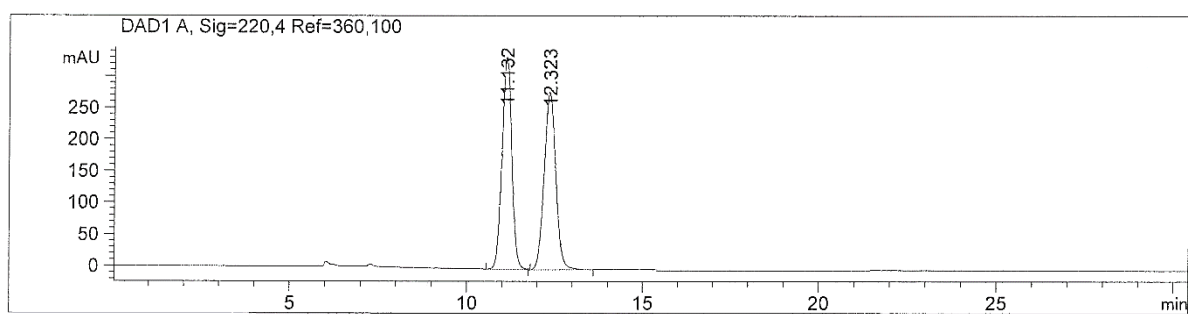

(b)

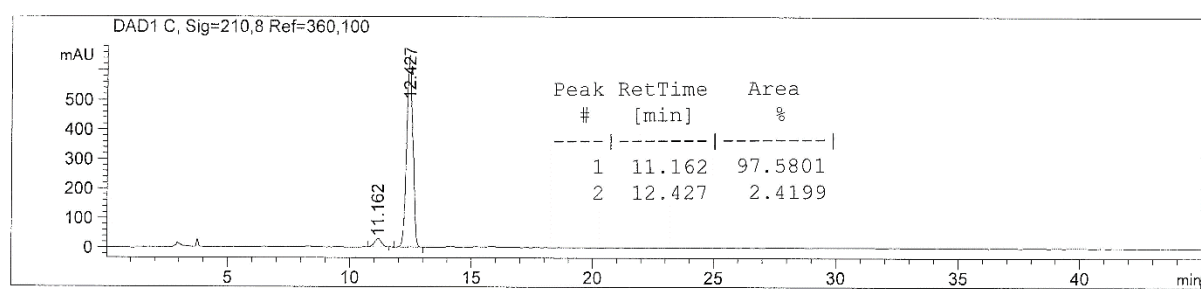

**Figure S142.** HPLC trace of: (a) racemic and (b) enantioenriched product (95% (*S*) ee using **4a** catalytic system; Scheme 4).

**Ethyl 2,4,4,4-tetrafluoro-3-phenylbutanoate (from S70).**<sup>35</sup> Enantiomeric excess determined by GC

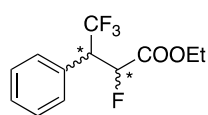

using Hydrodex B-3P column (100 kPa H<sub>2</sub>, 80 °C isotherm). t<sub>R</sub> 58.7 min (*S,R*); t<sub>R</sub>

62.5 min (*R,S*). <sup>1</sup>H NMR (CDCl<sub>3</sub>), δ: 1.15 (t, *J*= 7.2 Hz, 3H), 4.00 (ddd, 1H, *J*= 22.7

Hz, *J*= 8.8 Hz, *J*= 5.7 Hz), 4.14 (ddq, 2H, *J*= 10.8 Hz, *J*= 7.3 Hz, *J*= 3.7 Hz), 5.24

(dd, 1H, *J*= 47.7 Hz, *J*= 5.7 Hz), 7.39 (s, 5H).

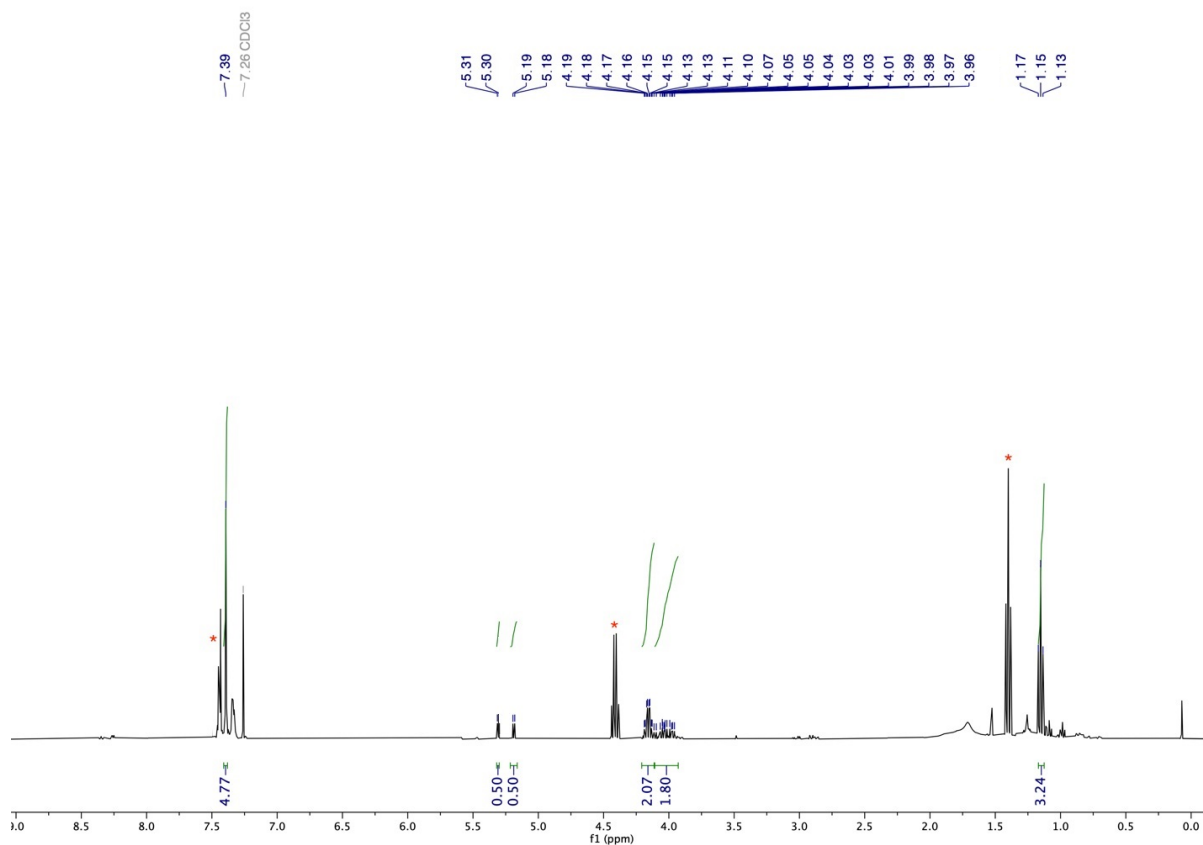

**Figure S143.** <sup>1</sup>H NMR spectrum of ethyl 2,4,4,4-tetrafluoro-3-phenylbutanoate (from S70) in CDCl<sub>3</sub> (signals marked with \* correspond to starting material).

(a)

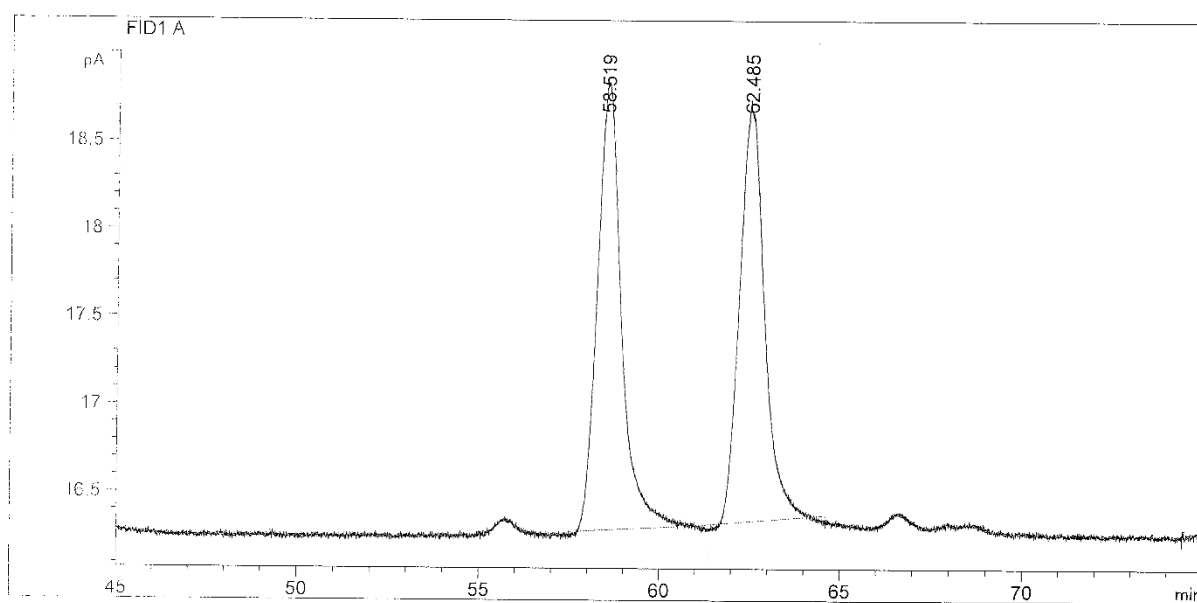

(b)

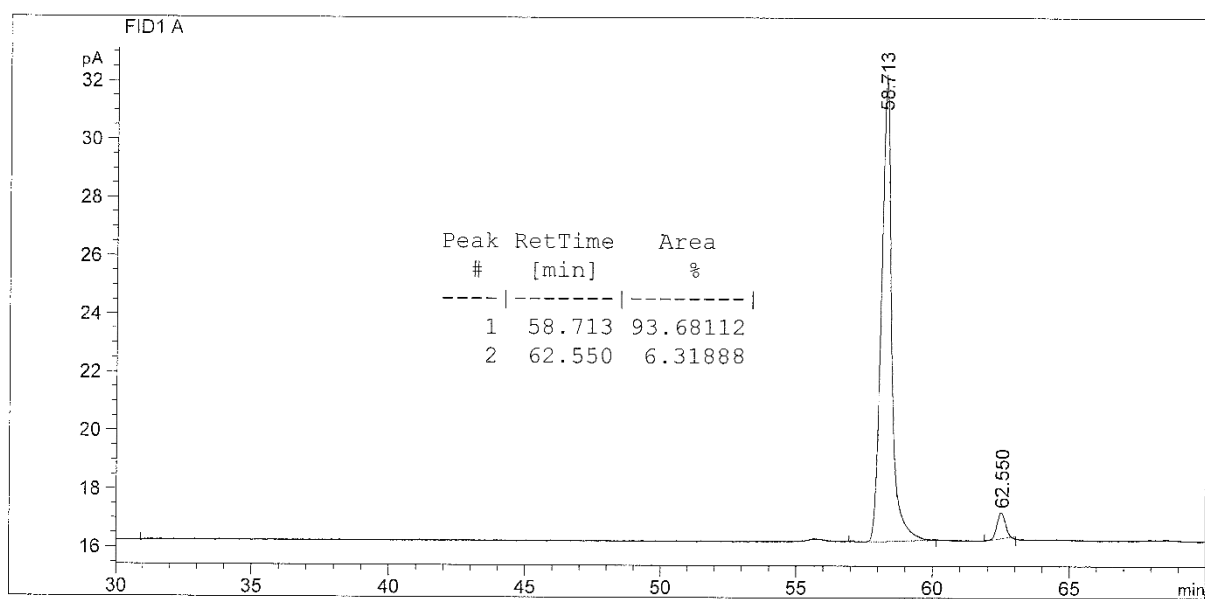

**Figure S144.** GC traces of: (a) racemic and (b) enantioenriched product (87% (*S,R*) ee using **4c** catalytic system; Scheme 5).

**Ethyl 2,4,4,4-tetrafluoro-3-(p-tolyl)butanoate (from S71).** Enantiomeric excess determined by HPLC

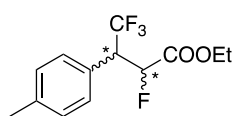

using Chiracel OD-H column (hexane/2-propanol=90/10, 0.5 mL/min, 220 nm).  
 $t_R$  8.3 min (*S,R*);  $t_R$  9.1 min (*R,S*).  $^1H$  NMR ( $CDCl_3$ ),  $\delta$ : 1.09 (t,  $J=7.2$  Hz, 3H), 2.28 (s, 3H), 3.94 - 4.00 (m, 1H), 4.08 (qd, 2H,  $J=7.1$  Hz,  $J=2.5$  Hz), 5.14 (dd, 1H,  $J=47.8$  Hz,  $J=5.7$  Hz), 7.10 - 7.21 (m, 4H).  $^{19}F$  NMR ( $CDCl_3$ ),  $\delta$ : -194.1 - -194.0 (m), -65.3 (t,  $J=9.7$  Hz).  $^{13}C$  NMR ( $CDCl_3$ ),  $\delta$ : 13.8, 21.1, 51.4 (dd,  $J=19.1$  Hz,  $J=27.6$  Hz), 62.2, 88.1 (d,  $J=195.7$  Hz), 123.7 - 139.2 (aromatic carbons), 166.9 (d,  $J=23.3$  Hz). HRMS-EI calculated for  $C_{13}H_{14}F_4O_2$   $[M+Na]^+$ : 301.0828, found: 301.0823.

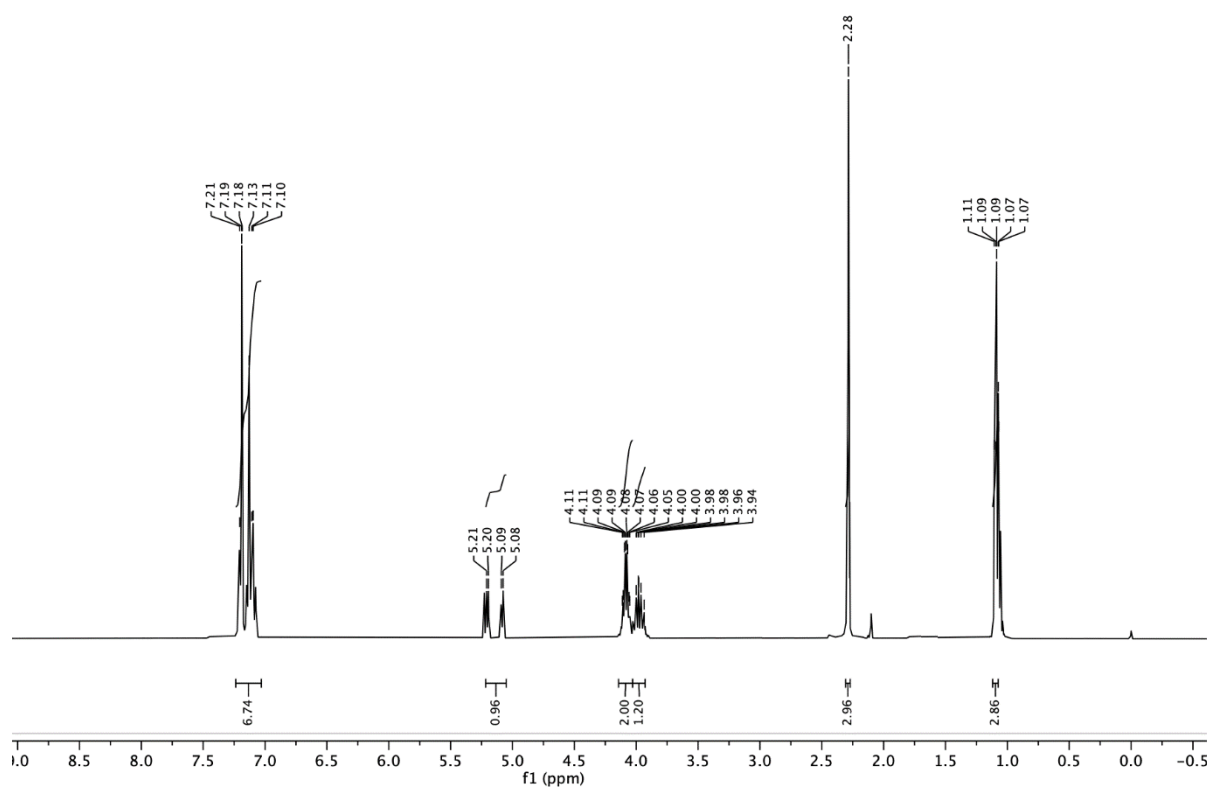

**Figure S145.**  $^1H$  NMR spectrum of ethyl 2,4,4,4-tetrafluoro-3-(p-tolyl)butanoate (from S71) in  $CDCl_3$ .

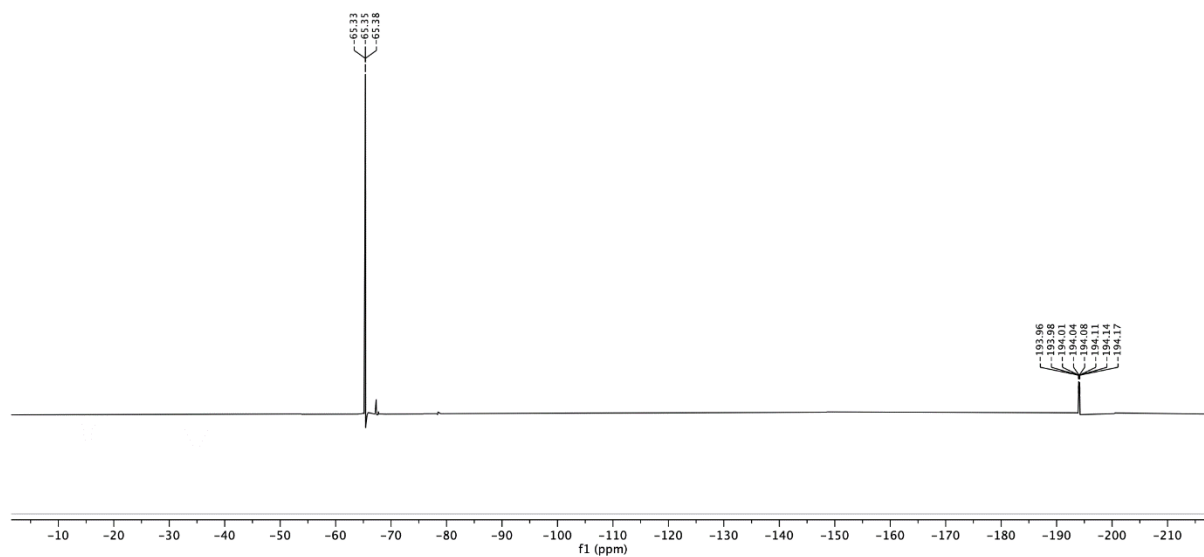

**Figure S146.**  $^{19}\text{F}$  NMR spectrum of ethyl 2,4,4,4-tetrafluoro-3-(p-tolyl)butanoate (from S71) in  $\text{CDCl}_3$ .

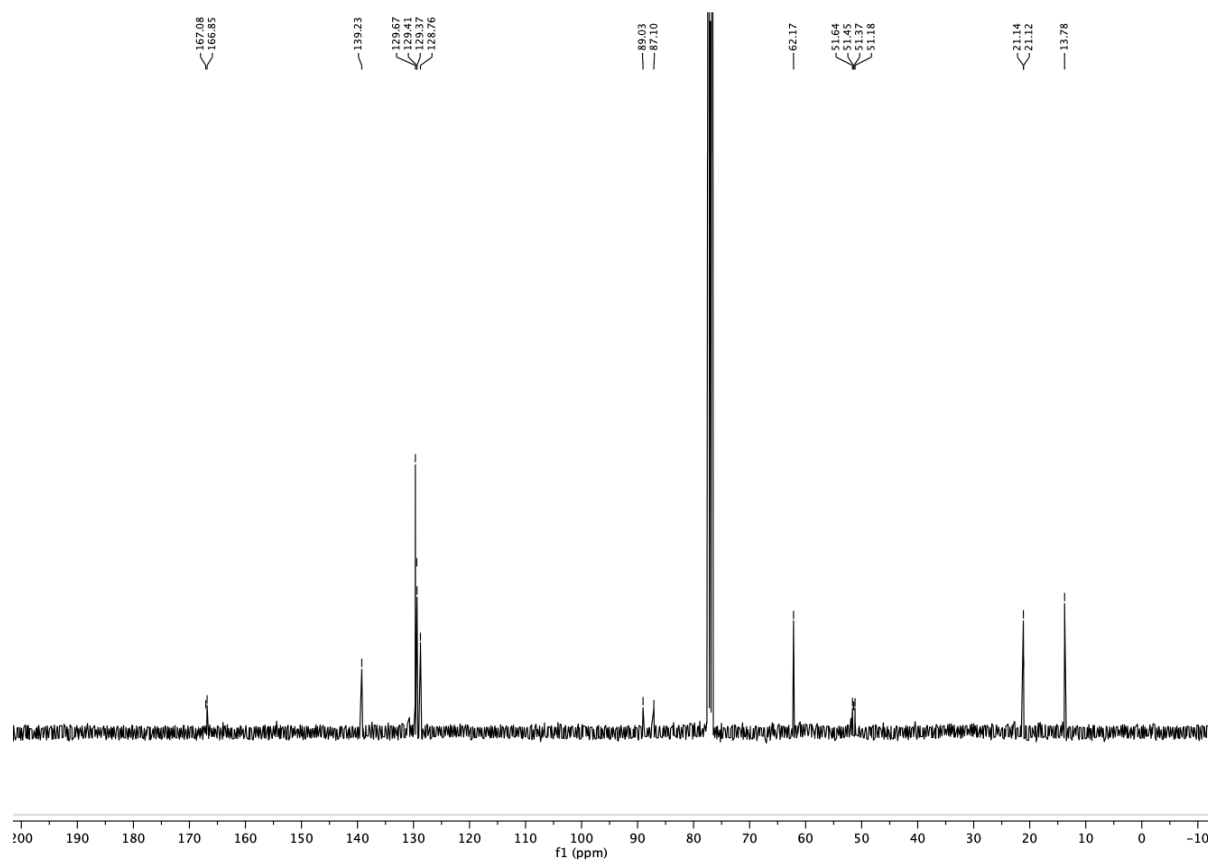

**Figure S147.**  $^{13}\text{C}$   $\{^1\text{H}\}$  NMR spectrum of ethyl 2,4,4,4-tetrafluoro-3-(p-tolyl)butanoate (from S71) in  $\text{CDCl}_3$ .



(a)

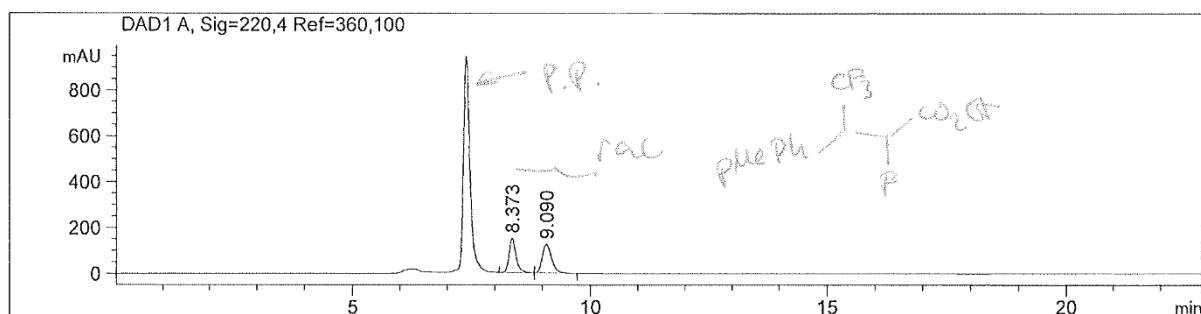

(b)

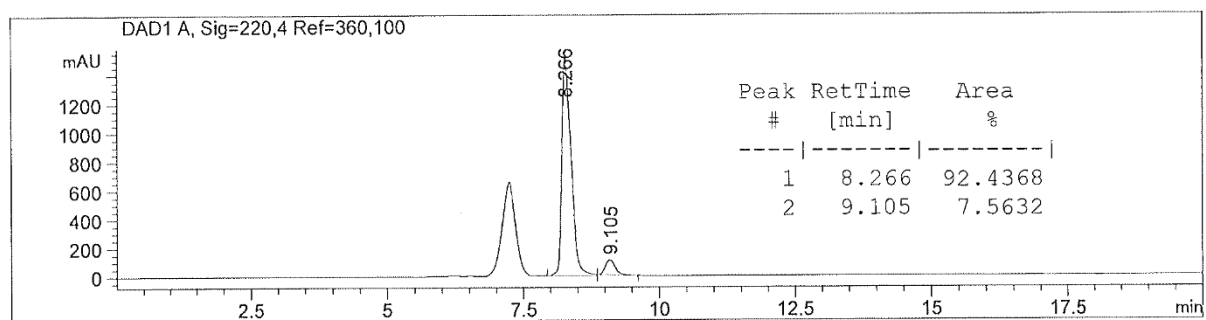

**Figure S148.** HPLC traces of (a) racemic and (b) enantioenriched product (85% (*S,R*) ee using **4c** catalytic system; Scheme 5). The peak at ca 7.5 min correspond to the unreacted starting material (**S71**).

**Ethyl 2,4,4,4-tetrafluoro-3-(4-methoxyphenyl)butanoate (from S72).** Enantiomeric excess determined

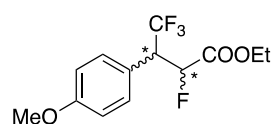

by HPLC using Chiralcel OD-H column (hexane/2-propanol=90/10, 0.5 mL/min, 220 nm).  $t_R$  10.1 min (*S,R*);  $t_R$  10.7 min (*R,S*).  $^1\text{H}$  NMR ( $\text{CDCl}_3$ ),  $\delta$ : 1.10 (t,  $J=7.1$  Hz, 3H), 3.74 (s, 3H), 3.83 – 3.92 (m, 1H), 4.09 (tq, 2H,  $J=7.1$  Hz,  $J=3.3$  Hz), 5.13 (dd, 1H,  $J=47.8$  Hz,  $J=5.7$  Hz), 6.83 (d, 2H,  $J=8.9$  Hz), 7.23 (d, 2H,  $J=8.7$  Hz).  $^{19}\text{F}$  NMR ( $\text{CDCl}_3$ ),  $\delta$ : -194.1 - -193.8 (m), -65.6 (m).  $^{13}\text{C}$  NMR ( $\text{CDCl}_3$ ),  $\delta$ : 13.8, 50.9 (m), 62.2, 88.1 (d,  $J=196.2$  Hz), 114.2 – 130.7 (aromatic carbons), 167.0 (d,  $J=23.4$  Hz). HRMS-EI calculated for  $\text{C}_{13}\text{H}_{14}\text{F}_4\text{O}_3$   $[\text{M}+\text{Na}]^+$  : 317.0777, found: 317.0772.

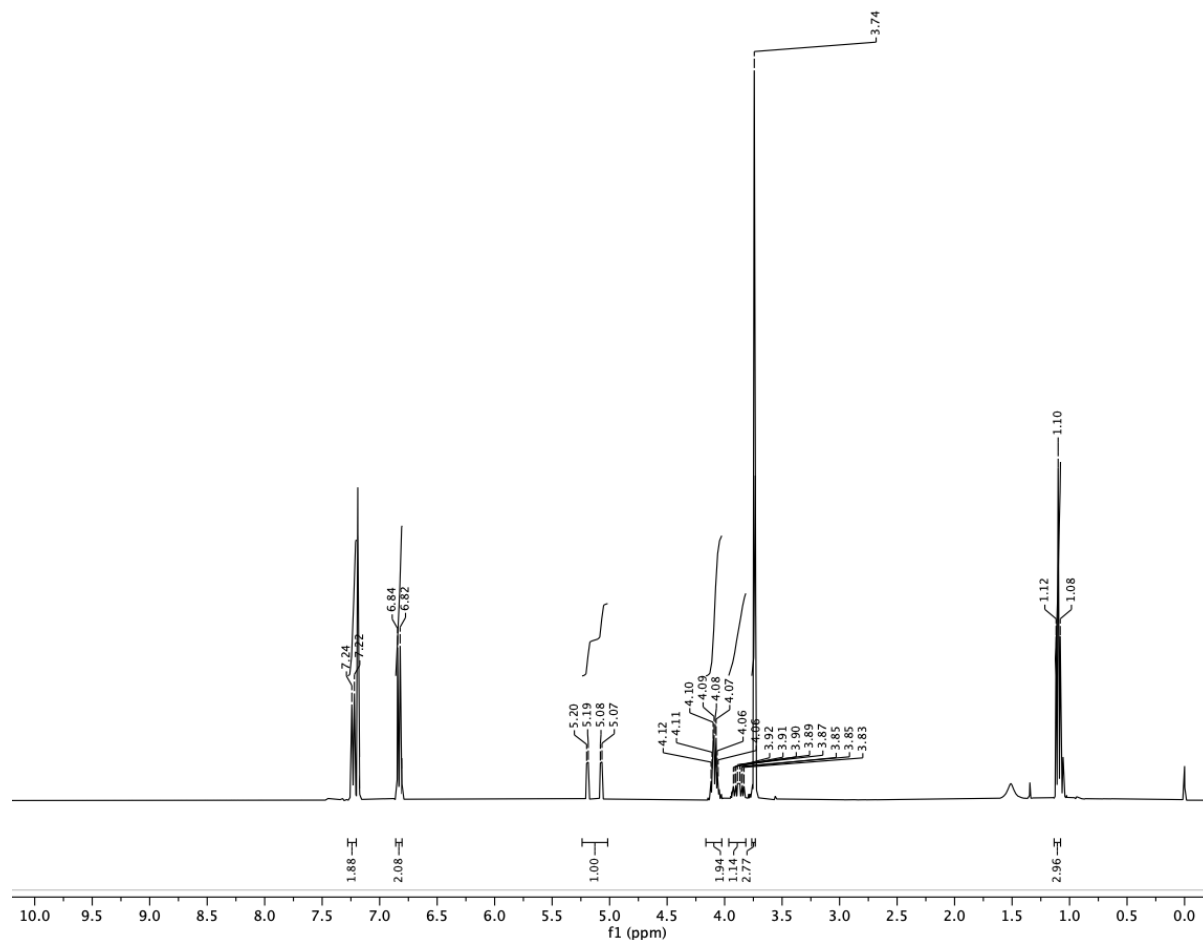

**Figure S149.**  $^1\text{H}$  NMR spectrum of ethyl 2,4,4,4-tetrafluoro-3-(4-methoxyphenyl)butanoate (from S72) in  $\text{CDCl}_3$ .

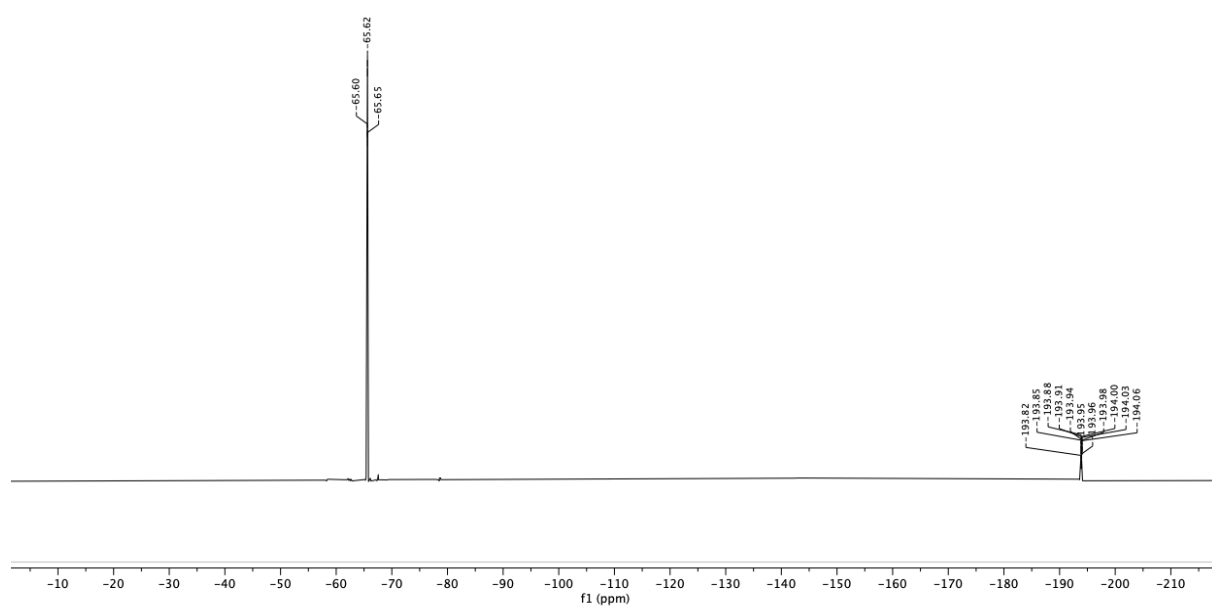

**Figure S150.**  $^{19}\text{F}$  NMR spectrum of ethyl 2,4,4,4-tetrafluoro-3-(4-methoxyphenyl)butanoate (from **S72**) in  $\text{CDCl}_3$ .

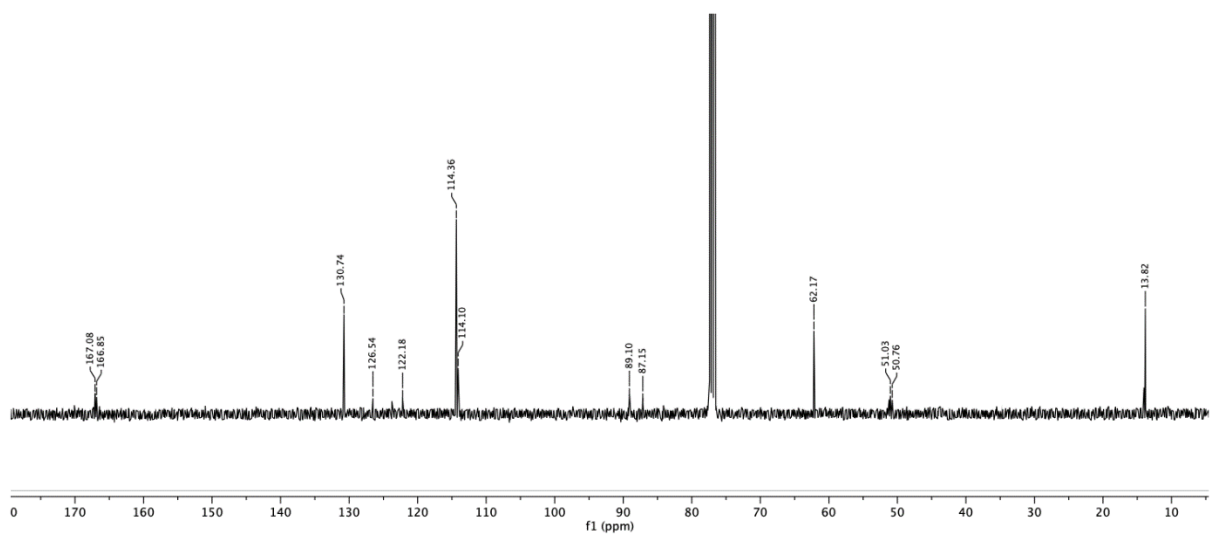

**Figure S151.**  $^{13}\text{C}\{^1\text{H}\}$  NMR spectrum of ethyl 2,4,4,4-tetrafluoro-3-(4-methoxyphenyl)butanoate (from **S72**) in  $\text{CDCl}_3$ .

(a)

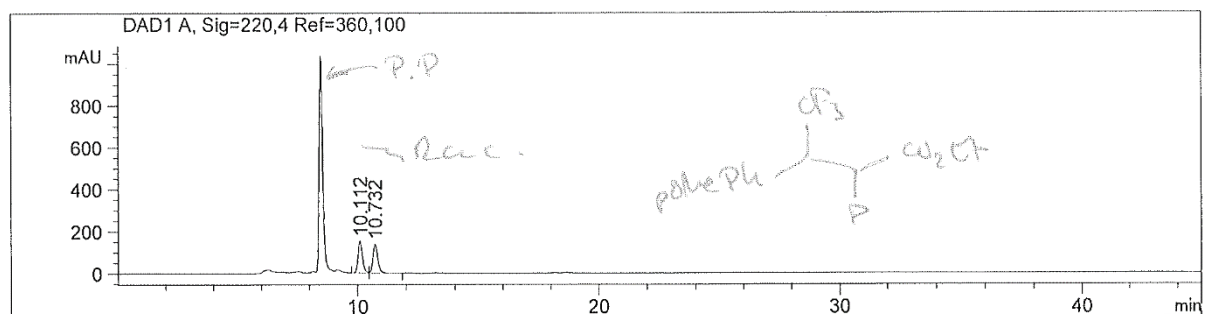

(b)

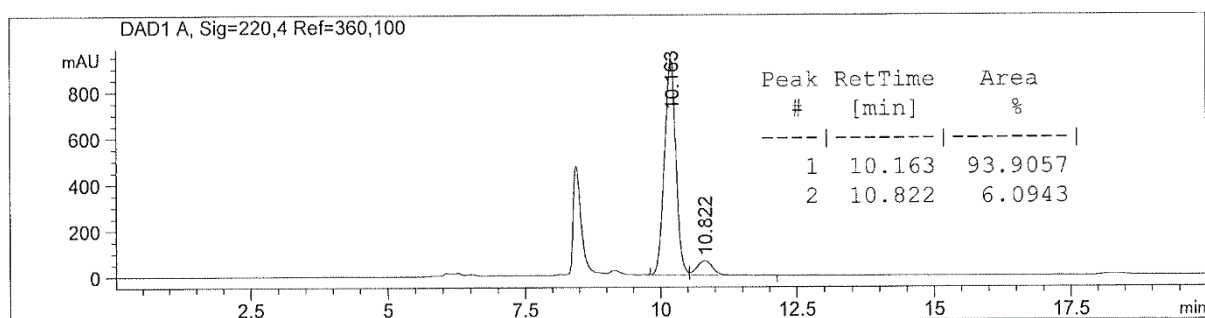

**Figure S152.** HPLC traces of (a) racemic and (b) enantioenriched product (88% (*S,R*) ee using **4c** catalytic system; Scheme 5). The peak at ca 8.5 min correspond to the unreacted starting material (**S72**).

**Ethyl 3-(4-bromophenyl)-2,4,4,4-tetrafluorobutanoate (from S73).** Enantiomeric excess determined

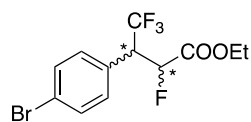

by HPLC using Chiracel OD-H column (hexane/2-propanol=90/10, 0.5 mL/min, 220 nm).  $t_R$  9.2 min (*S,R*);  $t_R$  9.9 min (*R,S*).  $^1\text{H}$  NMR ( $\text{CDCl}_3$ ),  $\delta$ : 1.08 (t,  $J=7.1$  Hz, 3H), 3.88 - 4.05 (m, 1H), 4.06 - 4.11 (m, 2H), 5.17 (dd, 1H,  $J=47.7$  Hz,  $J=5.6$  Hz), 7.26 - 7.32 (m, 4H).  $^{19}\text{F}$  NMR ( $\text{CDCl}_3$ ),  $\delta$ : -194.3 - -194.0 (m), -65.2 (m).  $^{13}\text{C}$  NMR ( $\text{CDCl}_3$ ),  $\delta$ : 13.8, 51.8 (dd,  $J=19.1$  Hz,  $J=27.6$  Hz), 62.2, 88.0 (d,  $J=196.0$  Hz), 123.7 - 130.3 (aromatic carbons), 166.9 (d,  $J=23.3$  Hz). HRMS-EI calculated for  $\text{C}_{12}\text{H}_{11}\text{BrF}_4\text{O}_2$  [ $\text{M}+\text{Na}$ ] $^+$ : 364.9776, found: 364.9772.

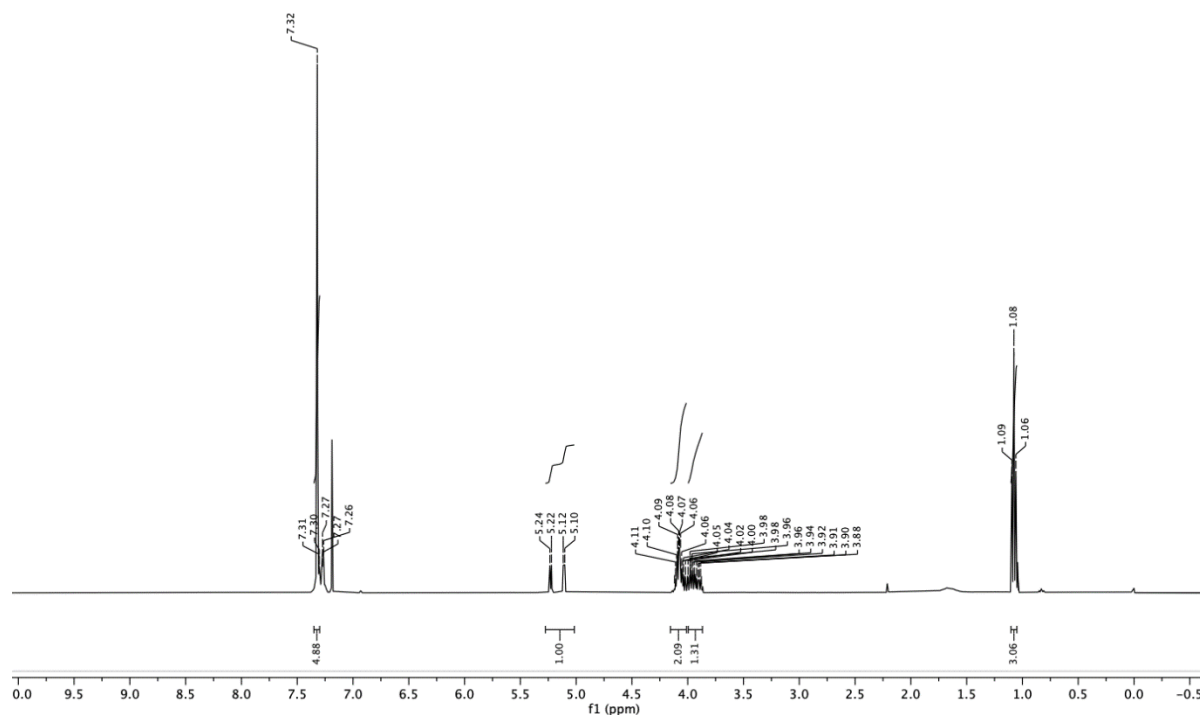

**Figure S153.**  $^1\text{H}$  NMR spectrum of ethyl 3-(4-bromophenyl)-2,4,4,4-tetrafluorobutanoate (from S73) in  $\text{CDCl}_3$ .

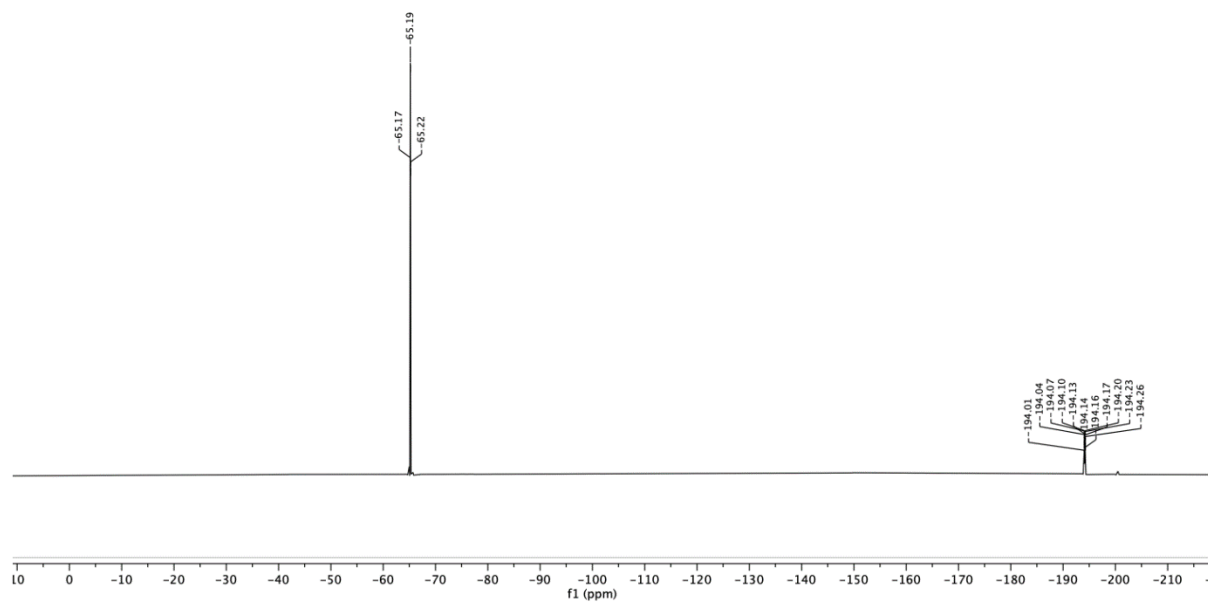

**Figure S154.**  $^{19}\text{F}$  NMR spectrum of ethyl 3-(4-bromophenyl)-2,4,4,4-tetrafluorobutanoate (from **S73**) in  $\text{CDCl}_3$ .

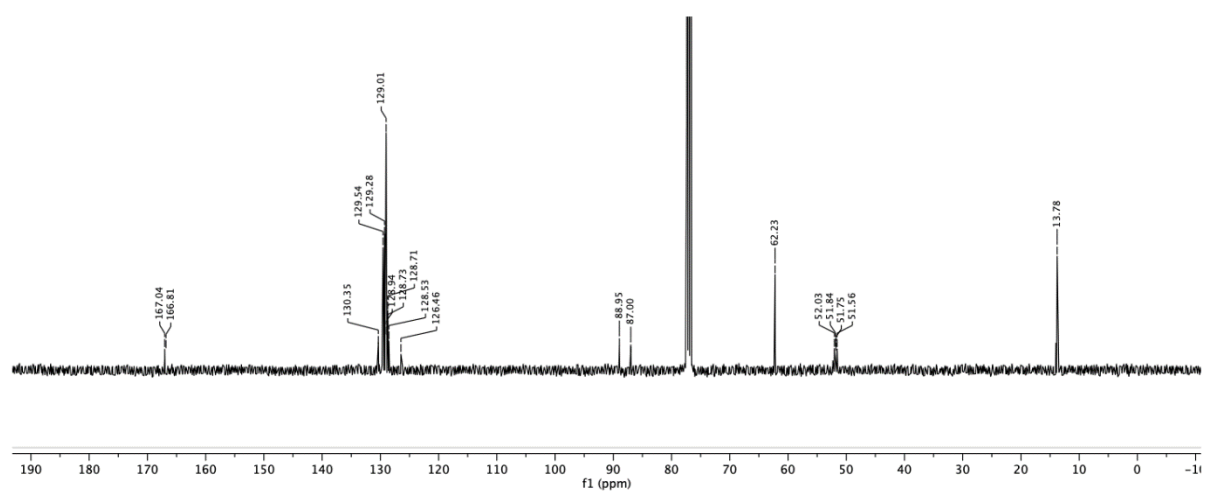

**Figure S155.**  $^{13}\text{C}$   $\{^1\text{H}\}$  NMR spectrum of ethyl 3-(4-bromophenyl)-2,4,4,4-tetrafluorobutanoate (from **S73**) in  $\text{CDCl}_3$ .

(a)

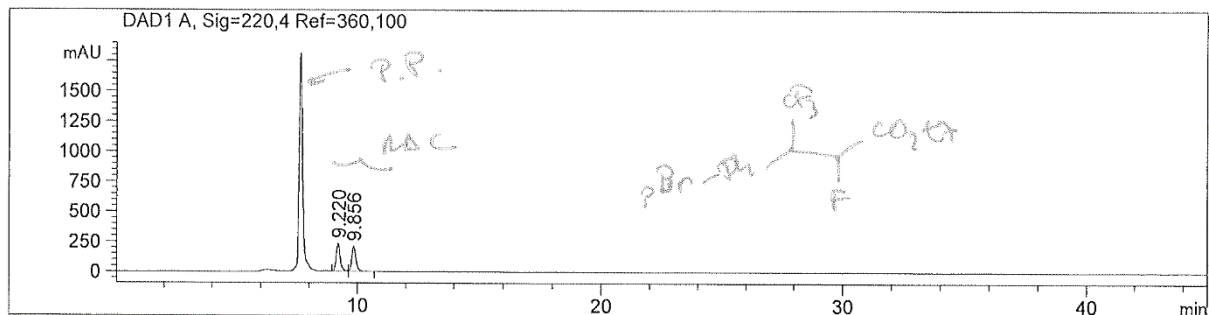

(b)

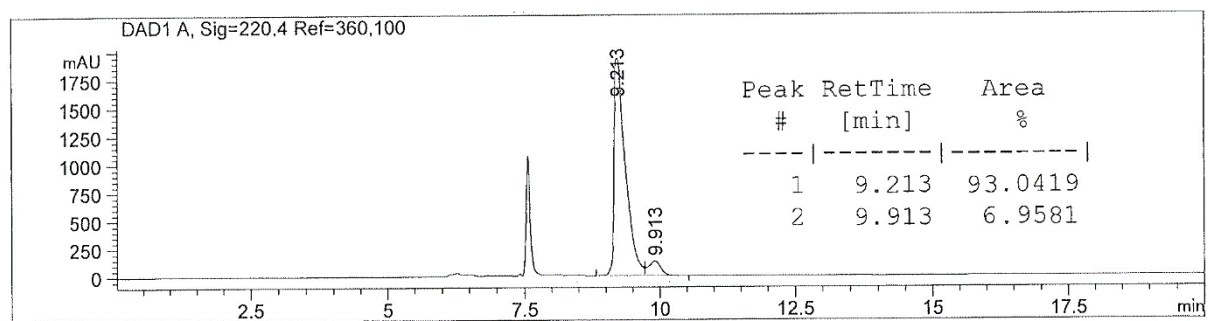

**Figure S156.** HPLC traces of (a) racemic and (b) enantioenriched product (86% (*S,R*) ee using **4c** catalytic system; Scheme 5). The peak at ca 7.5 min correspond to the unreacted starting material (**S73**).

**Diethyl 2-methyl-3-phenylsuccinate (from S74).**<sup>36</sup> Enantiomeric excess determined by HPLC using

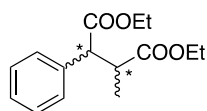

Chiralcel OJ-H column (hexane/2-propanol=87/13, 0.7 mL/min, 210 nm).  $t_R$  8.1 min

(*R,R*);  $t_R$  8.6 min (*S,S*).  $^1\text{H NMR}$  ( $\text{CDCl}_3$ ),  $\delta$ : 0.94 (t, 3H,  $J=$

7.1 Hz), 1.21 (t, 3H,  $J=$

7.1 Hz), 1.29 (d, 3H,  $J=$  6.9 Hz), 3.21-3.25 (m, 1H), 3.77 (d, 1H,  $J=$  11.0 Hz), 3.86 (q, 2H,  $J=$  7.1 Hz), 4.07-4.20 (m, 2H), 7.23-7.35 (m, 5H).

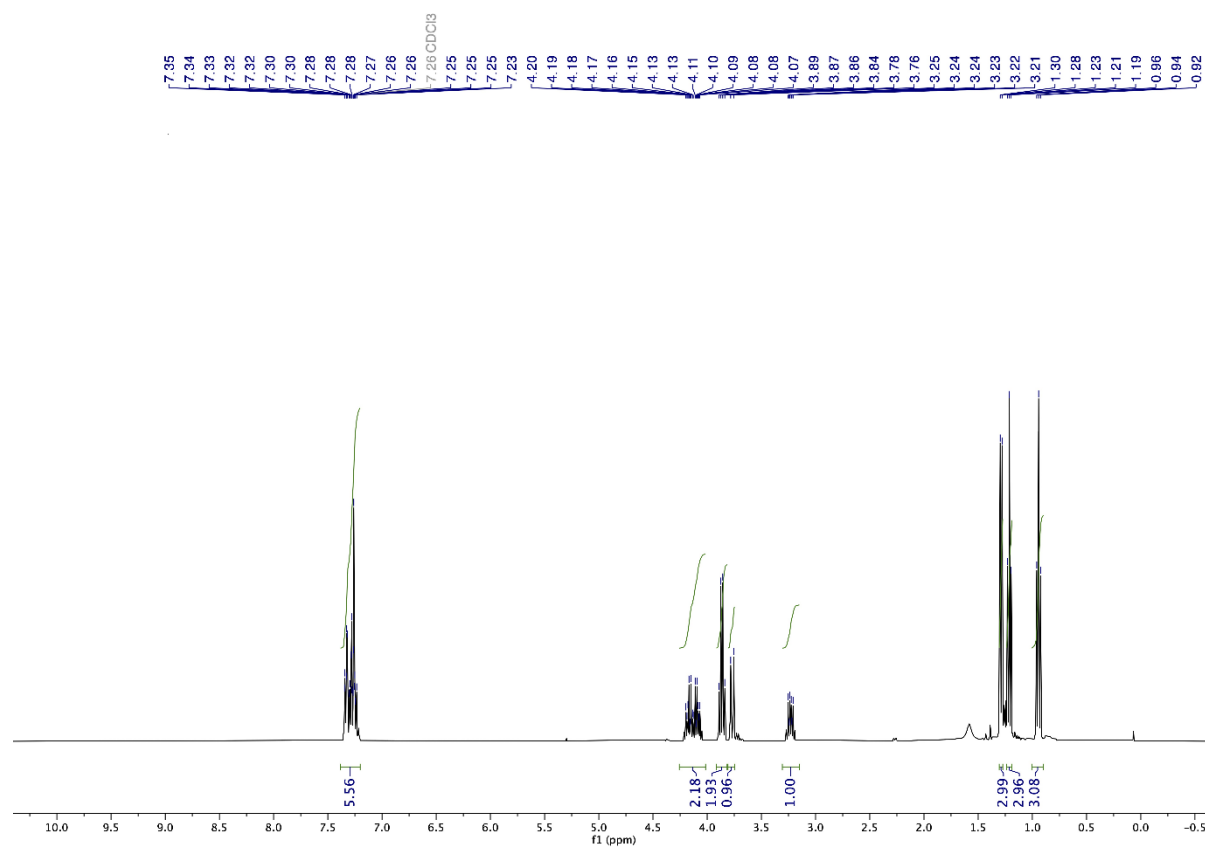

**Figure S157.**  $^1\text{H NMR}$  spectrum of diethyl 2-methyl-3-phenylsuccinate (from S74) in  $\text{CDCl}_3$ .



(a)

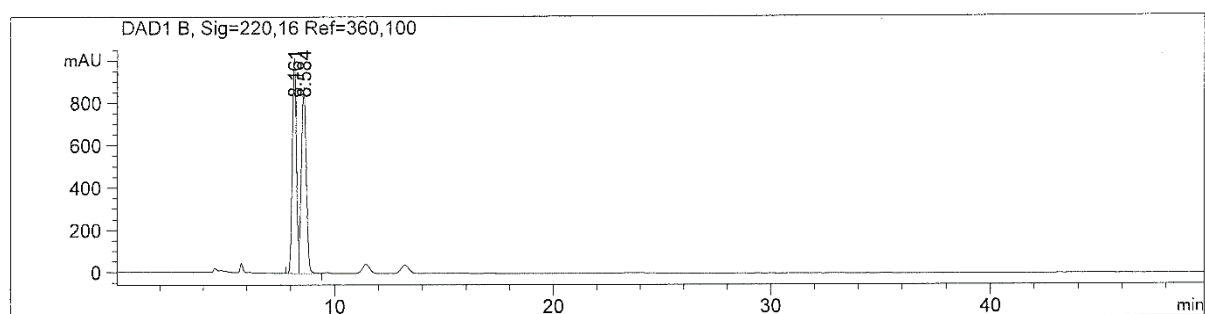

(b)

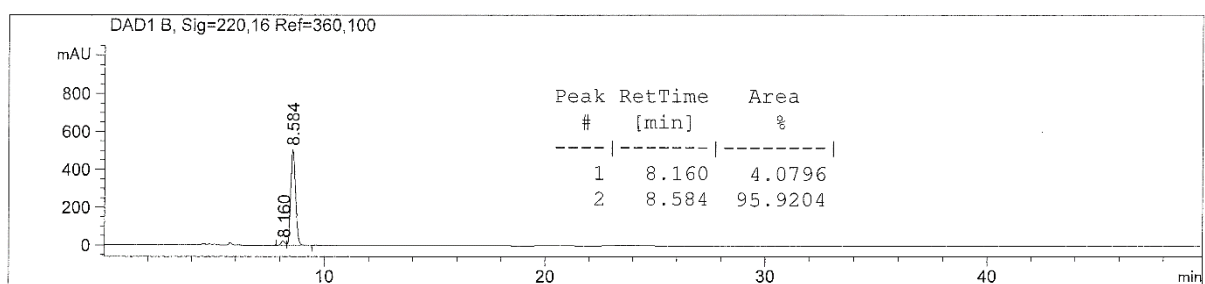

**Figure S158.** HPLC trace of: (a) racemic and (b) enantioenriched product (92% (*S,S*) ee using **4c** catalytic system; Scheme 5).

**1-Benzyl 4-ethyl 3-methyl-2-phenylsuccinate (from S75).**<sup>36</sup> Enantiomeric excess determined by HPLC using Chiralcel OJ-H column (hexane/2-propanol=95/5, 1 mL/min, 210 nm).  $t_R$  11.8 min (*R,R*);  $t_R$  13.0 min (*S,S*).  $^1\text{H NMR}$  ( $\text{CDCl}_3$ ),  $\delta$ : 0.94 (t, 3H,  $J=7.1$  Hz), 1.27 (d, 3H,  $J=6.8$  Hz), 3.21-3.29 (m, 1H), 3.84-3.89 (m, 3H), 5.07 (d, 1H,  $J=12.5$  Hz), 5.16 (d, 1H,  $J=12.4$  Hz), 7.23-7.34 (m, 10H).

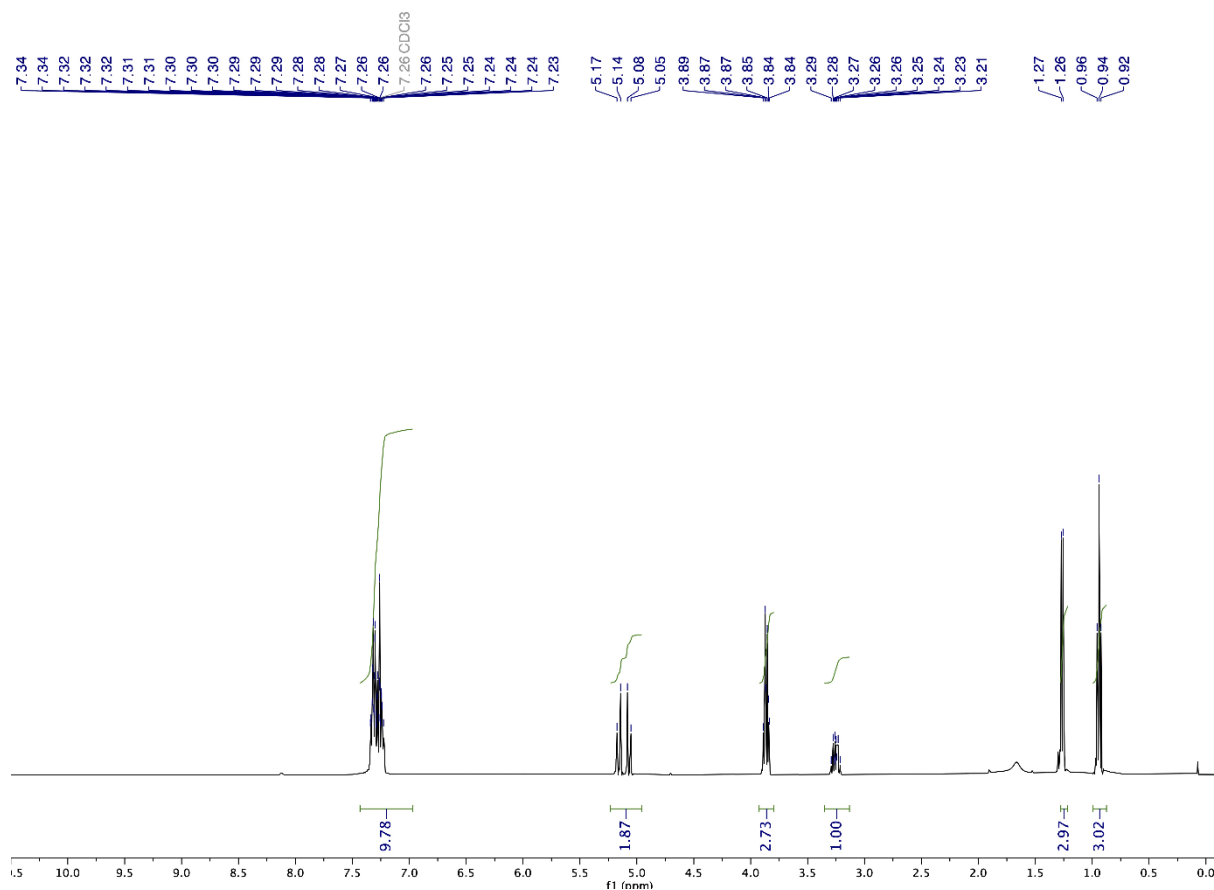

**Figure S159.**  $^1\text{H NMR}$  spectrum of 1-benzyl 4-ethyl 3-methyl-2-phenylsuccinate (from S75) in  $\text{CDCl}_3$ .

(a)

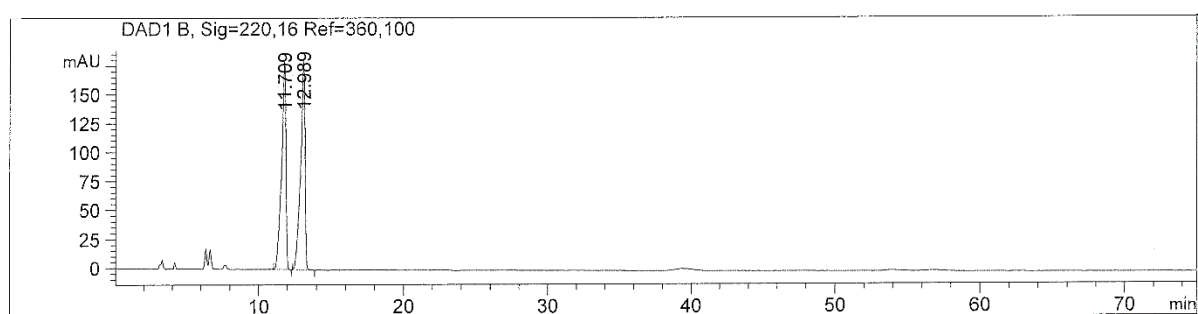

(b)

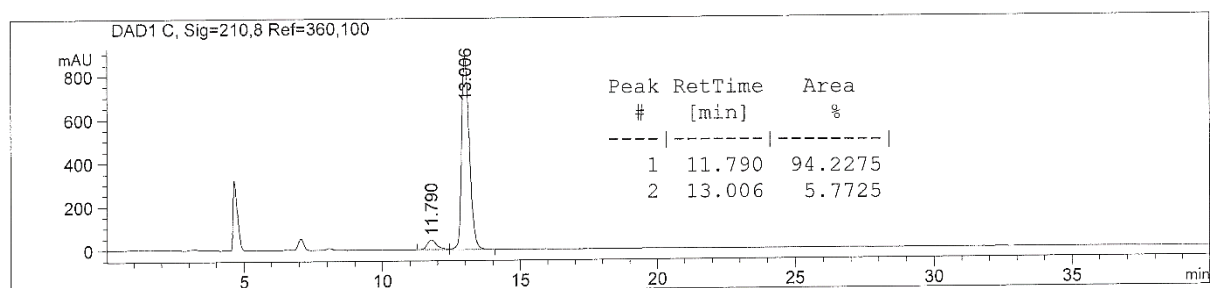

**Figure S160.** HPLC trace of: (a) and (b) enantioenriched product (88% (*S,S*) ee using **4c** catalytic system; Scheme 5).

**1-Benzyl 4-ethyl 3-methyl-2-(p-tolyl)succinate (from S76).**<sup>36</sup> Enantiomeric excess determined by

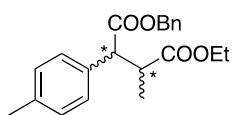

HPLC using Chiracel OJ-H column (hexane/2-propanol=95/5, 1 mL/min, 210 nm).  $t_R$  8.5 min (*R,R*);  $t_R$  9.7 min (*S,S*).  $^1\text{H NMR}$  ( $\text{CDCl}_3$ ),  $\delta$ : 0.97 (t, 3H,  $J=7.1$  Hz), 1.25 (d, 3H,  $J=6.8$  Hz), 2.31 (s, 3H), 3.23 (dq, 1H,  $J=6.8$  Hz,  $J=10.9$  Hz), 3.82 (d, 1H,  $J=10.9$  Hz), 3.88 (q, 2H,  $J=7.1$  Hz), 5.05 (d, 1H,  $J=12.4$  Hz), 5.16 (d, 1H,  $J=12.4$  Hz), 7.08-7.10 (m, 2H), 7.19-7.32 (m, 8H).

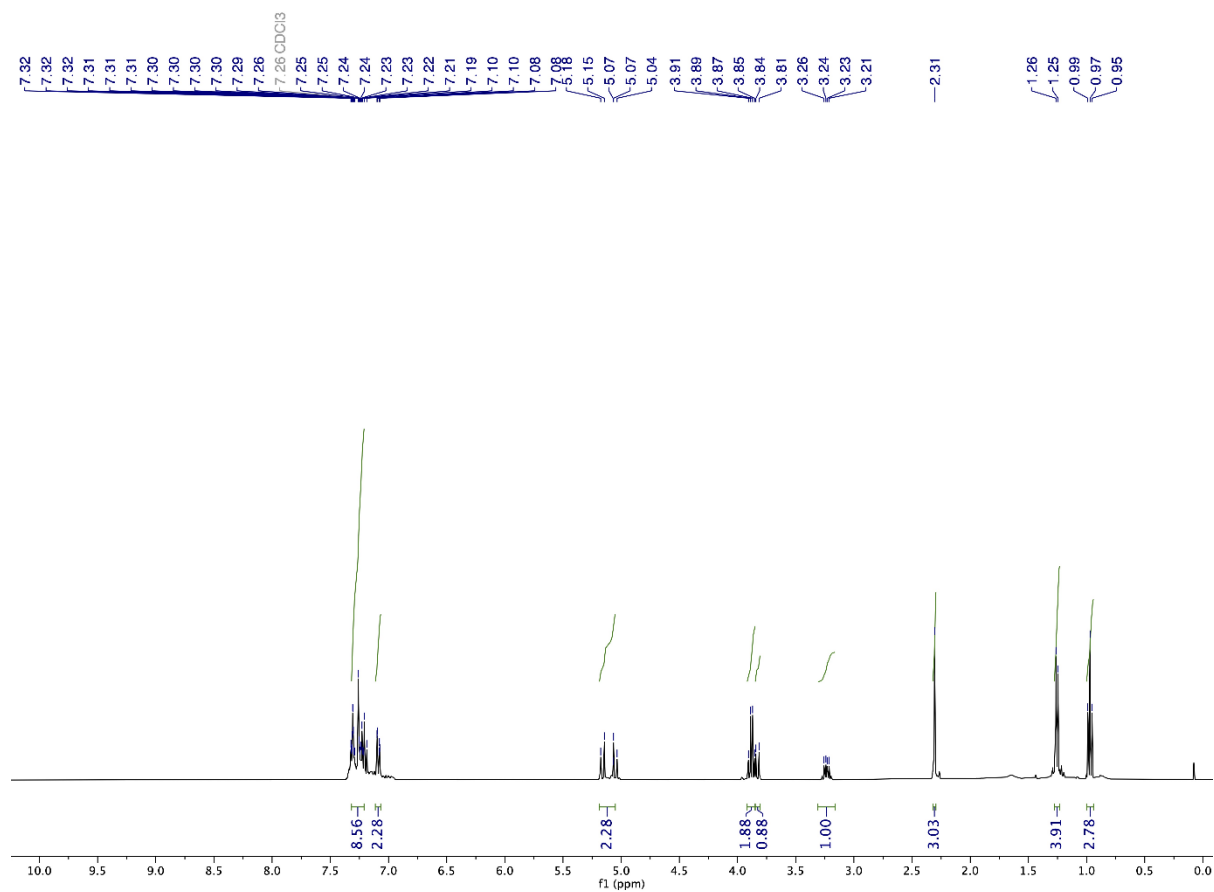

**Figure S161.**  $^1\text{H NMR}$  spectrum of 1-benzyl 4-ethyl 3-methyl-2-(p-tolyl)succinate (from S76) in  $\text{CDCl}_3$ .

(a)

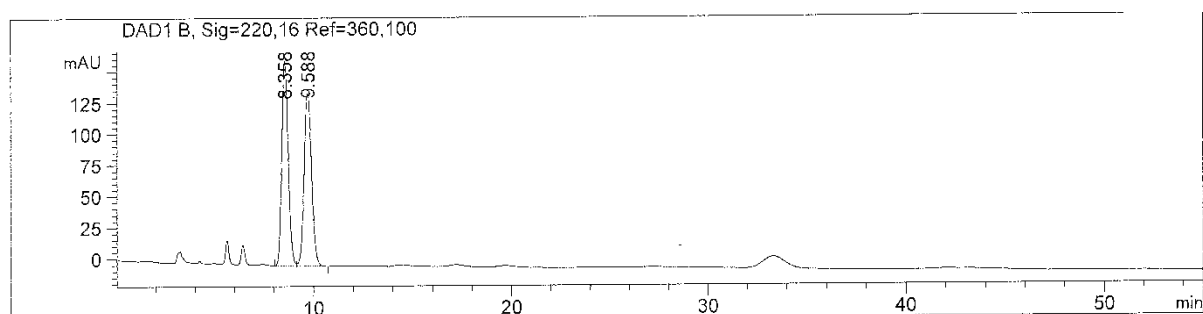

(b)

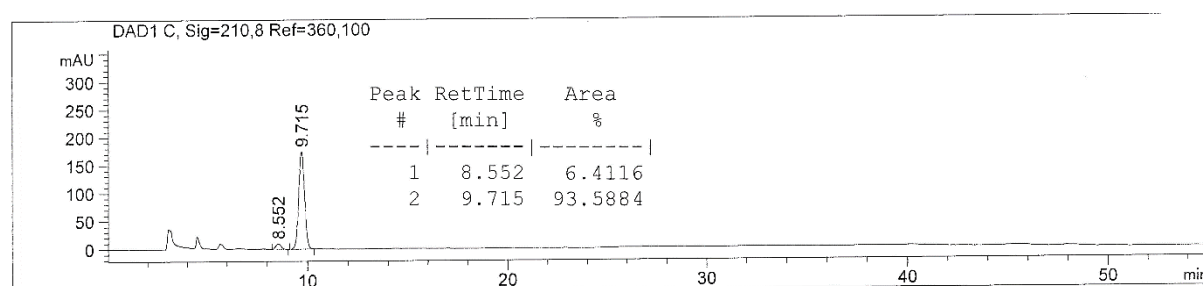

**Figure S162.** HPLC trace of: (a) racemic and (b) enantioenriched product (87% (*S,S*) ee using **4c** catalytic system; Scheme 5).

**1-Benzyl 4-ethyl 2-(4-methoxyphenyl)-3-methylsuccinate (from S77).**<sup>36</sup> Enantiomeric excess

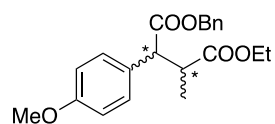

determined by HPLC using Chiralcel OJ-H column (hexane/2-propanol=95/5, 1 mL/min, 210 nm).  $t_R$  14.6 min (*R,R*);  $t_R$  18.8 min (*S,S*).  $^1\text{H}$  NMR ( $\text{CDCl}_3$ ),  $\delta$ : 0.97 (t, 3H,  $J=7.1$  Hz), 1.25 (d, 3H,  $J=6.8$  Hz), 3.22 (dq, 1H,  $J=6.8$  Hz,  $J=11.0$  Hz), 3.78 (s, 3H), 3.80 (d, 1H,  $J=11.1$  Hz), 3.88 (q, 2H,  $J=7.1$  Hz), 5.06 (d, 1H,  $J=12.4$  Hz), 5.15 (d, 1H,  $J=12.4$  Hz), 6.80-6.82 (m, 2H), 7.23-7.32 (m, 7H).

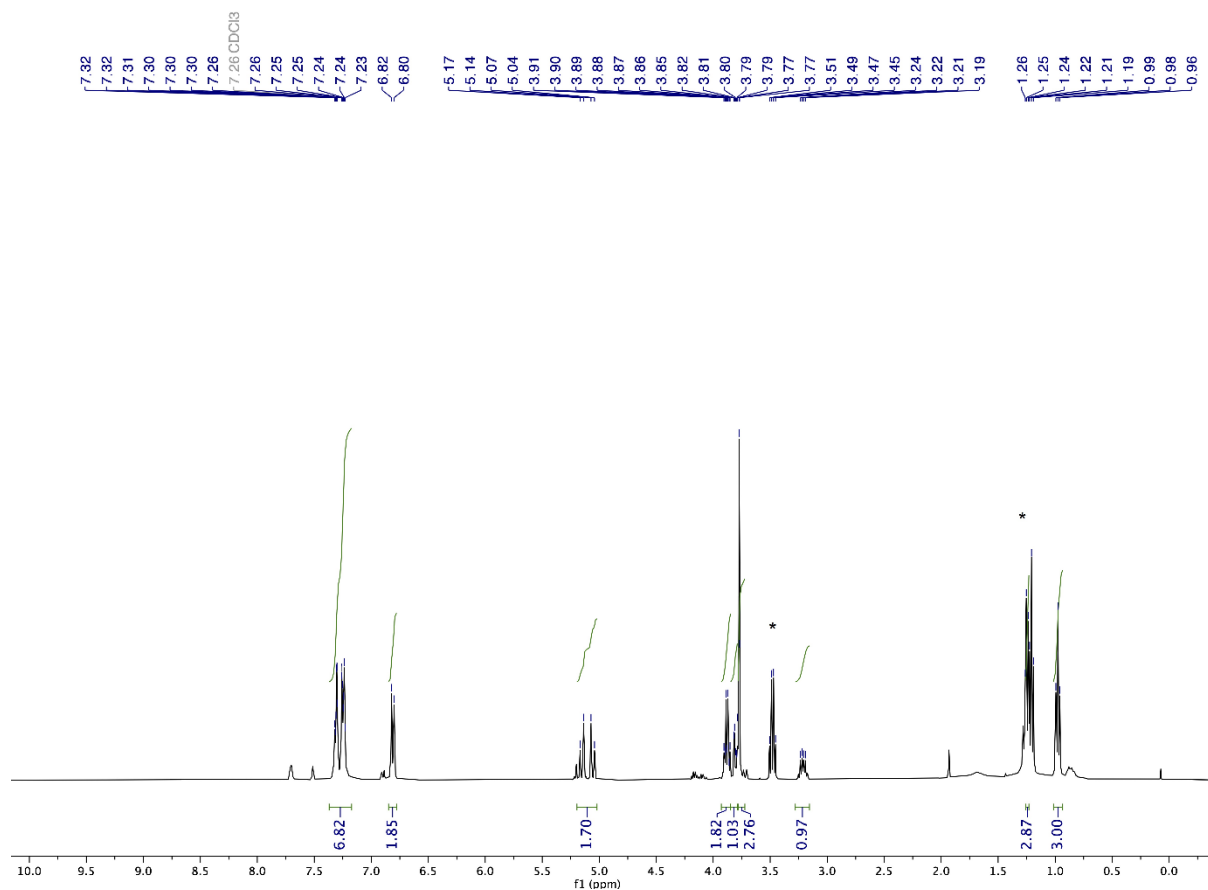

**Figure S163.**  $^1\text{H}$  NMR spectrum of 1-benzyl 4-ethyl 2-(4-methoxyphenyl)-3-methylsuccinate (from S77) in  $\text{CDCl}_3$ . The signals marked with an \* correspond to  $\text{Et}_2\text{O}$ .

(a)

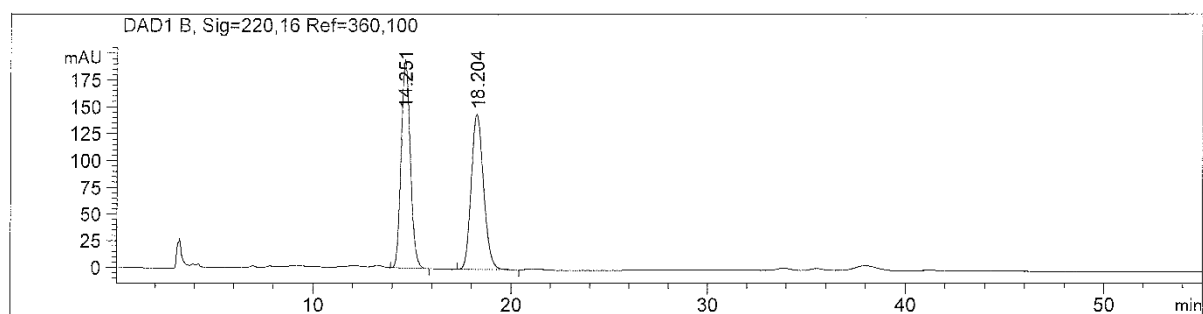

(b)

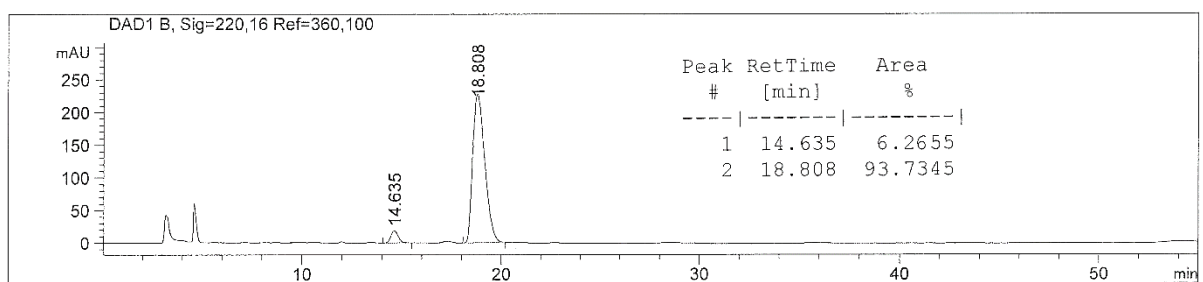

**Figure S164.** HPLC trace of: (a) racemic and (b) enantioenriched product (88% (*S,S*) ee using **4c** catalytic system; Scheme 5).

**1-Benzyl 4-ethyl 2-(2,5-dimethylfuran-3-yl)-3-methylsuccinate (from S78).**<sup>36</sup> Enantiomeric excess

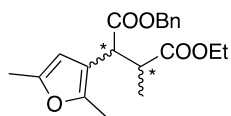

determined by HPLC using Chiracel IA column (hexane/2-propanol=95/5, 1 mL/min, 220 nm).  $t_R$  6.4 min (*S,S*);  $t_R$  7.1 min (*R,R*).  $^1H$  NMR ( $CDCl_3$ ),  $\delta$ : 1.08 (t, 3H,  $J=7.1$  Hz), 1.19 (d, 3H,  $J=6.9$  Hz), 2.18 (s, 6H), 3.07 (dq, 1H,  $J=6.9$  Hz,  $J=10.6$  Hz), 3.67 (d, 1H,  $J=10.6$  Hz), 3.95-4.01 (m, 2H), 5.09 (d, 1H,  $J=12.4$  Hz), 5.15 (d, 1H,  $J=12.4$  Hz), 5.92 (s, 1H), 7.26-7.35 (m, 5H).

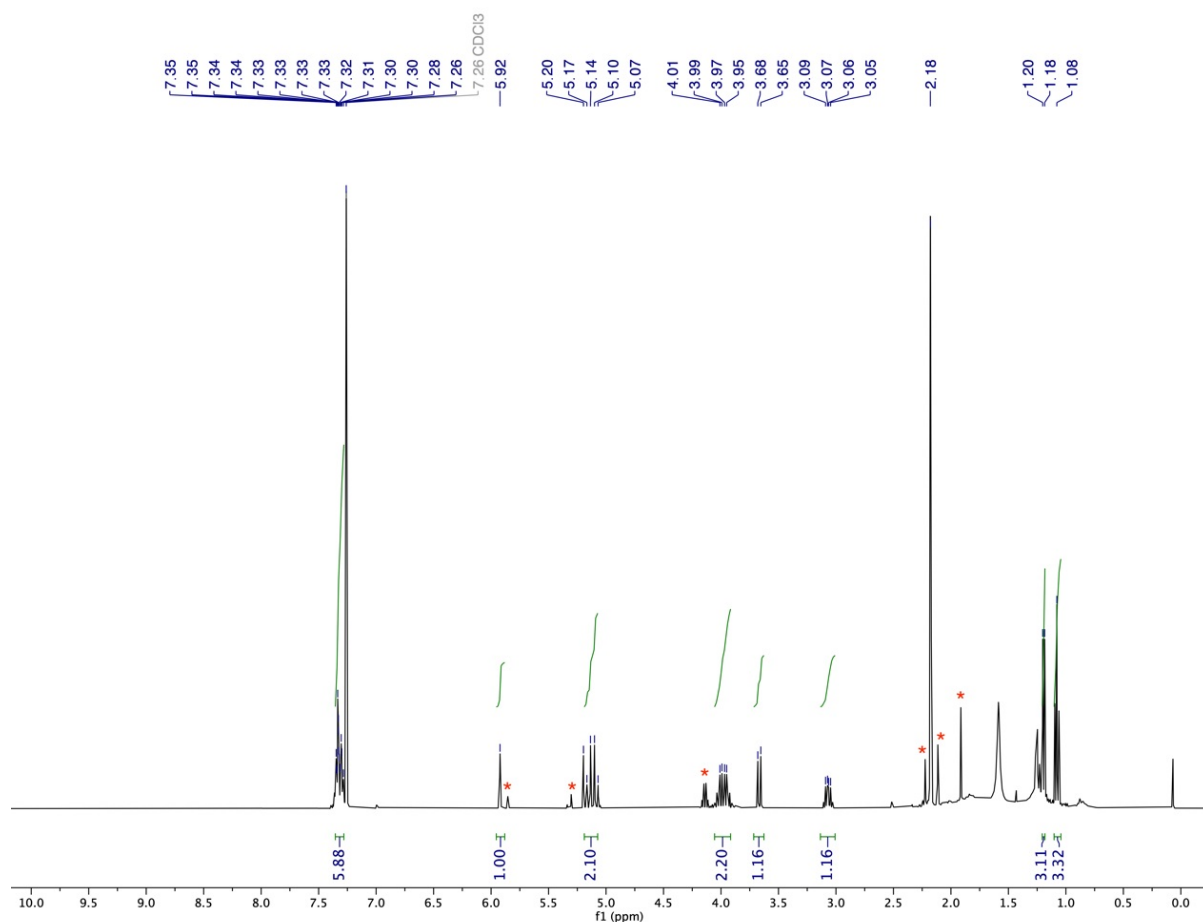

**Figure S165.**  $^1H$  NMR spectrum of 1-benzyl 4-ethyl 2-(2,5-dimethylfuran-3-yl)-3-methylsuccinate (from S78) in  $CDCl_3$  (peaks marked with \* correspond to starting material).



(a)

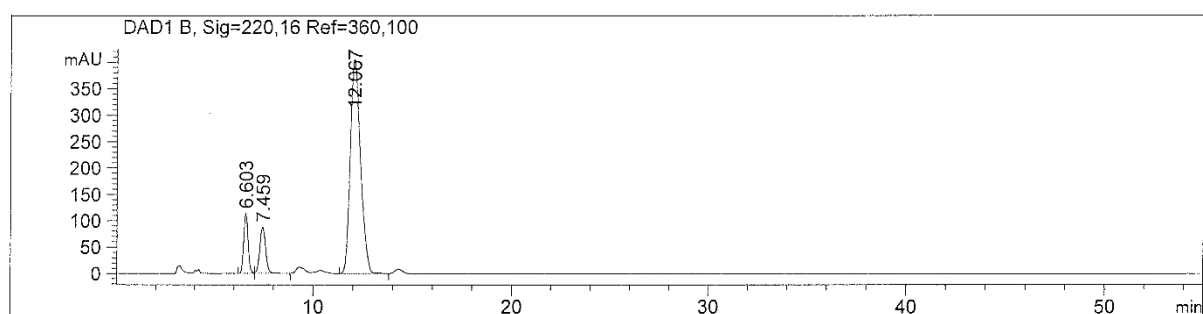

(b)

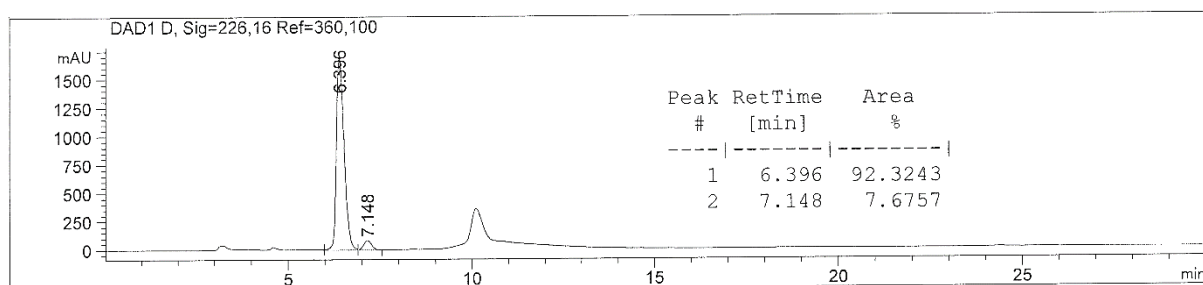

**Figure S166.** HPLC trace of: (a) racemic and (b) enantioenriched product (85% (*S,S*) ee using **4c** catalytic system; Scheme 5). The peak at 12 min corresponds to the unreacted starting material (**S78**).

**1-Benzyl 4-ethyl 2-(2,5-dimethylthiophen-3-yl)-3-methylsuccinate (from S79).**<sup>36</sup> Enantiomeric excess

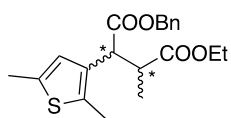

determined by HPLC using Chiracel IA column (hexane/2-propanol=99/1, 0.5 mL/min, 210 nm).  $t_R$  20.0 min (*S,S*);  $t_R$  21.4 min (*R,R*).  $^1\text{H NMR}$  ( $\text{CDCl}_3$ ),  $\delta$ : 1.01 (t, 3H,  $J=7.1$  Hz), 1.22 (d, 3H,  $J=6.8$  Hz), 2.31-2.34 (m, 3H), 2.33-2.36 (m, 3H), 3.17 (dq, 1H,  $J=6.9$  Hz,  $J=10.9$  Hz), 3.86-3.96 (m, 3H), 5.08 (d, 1H,  $J=12.5$  Hz), 5.15 (d, 1H,  $J=12.5$  Hz), 6.61-6.64 (m, 1H), 7.25-7.33 (m, 5H).

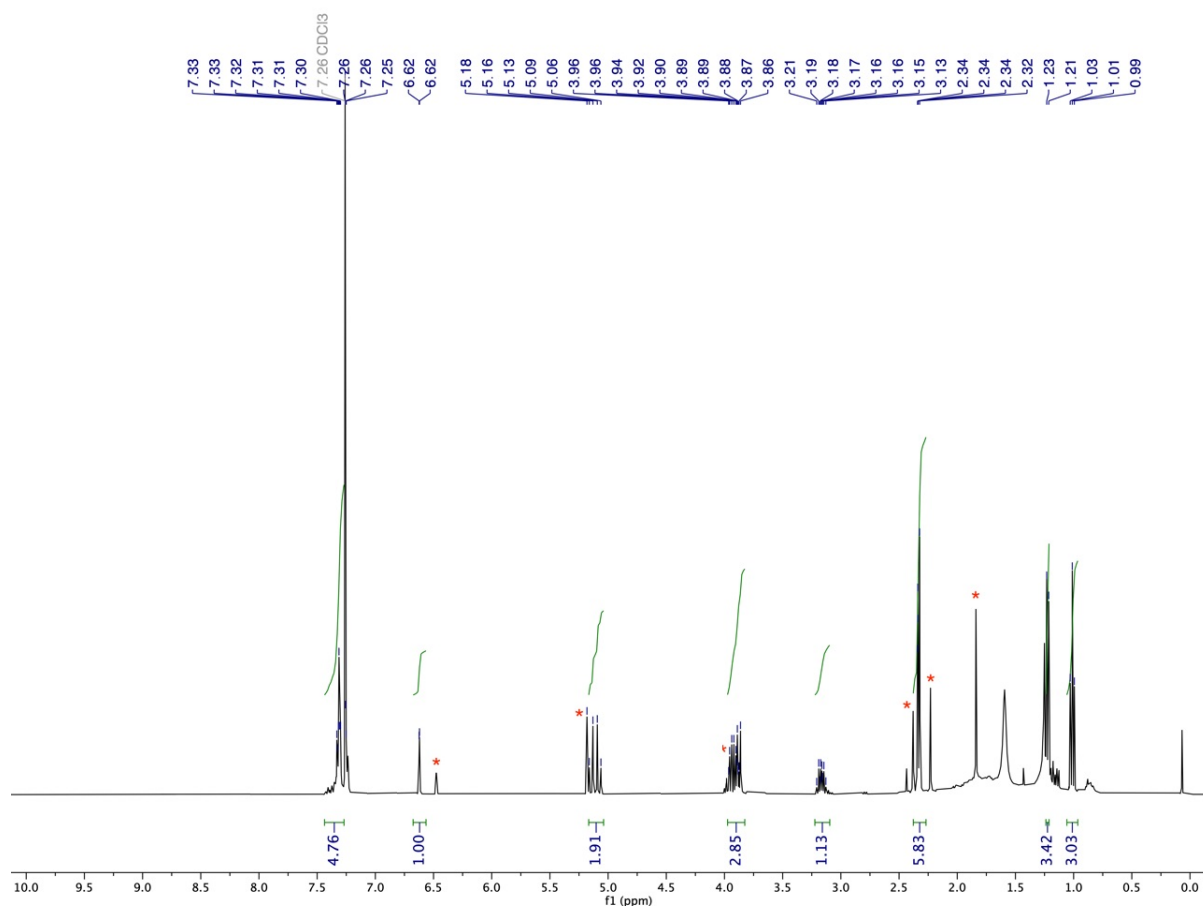

**Figure S167.**  $^1\text{H NMR}$  spectrum of 1-benzyl 4-ethyl 2-(2,5-dimethylthiophen-3-yl)-3-methylsuccinate (from S79) in  $\text{CDCl}_3$  (peaks marked with \* correspond to starting material).

(a)

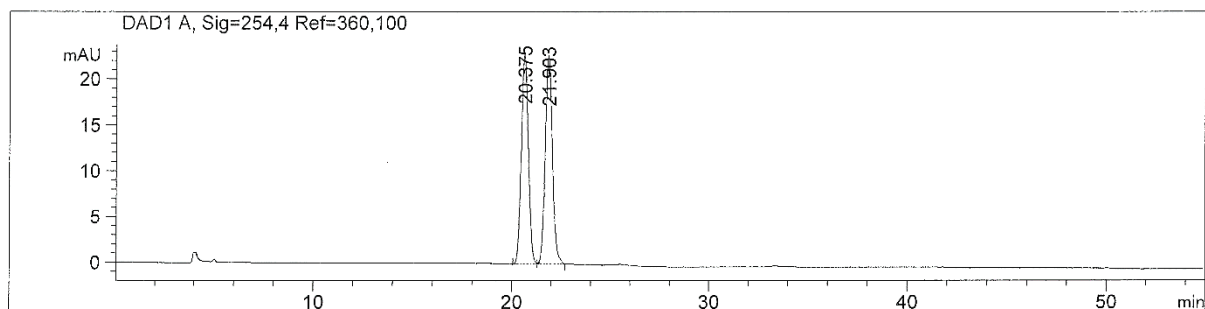

(b)

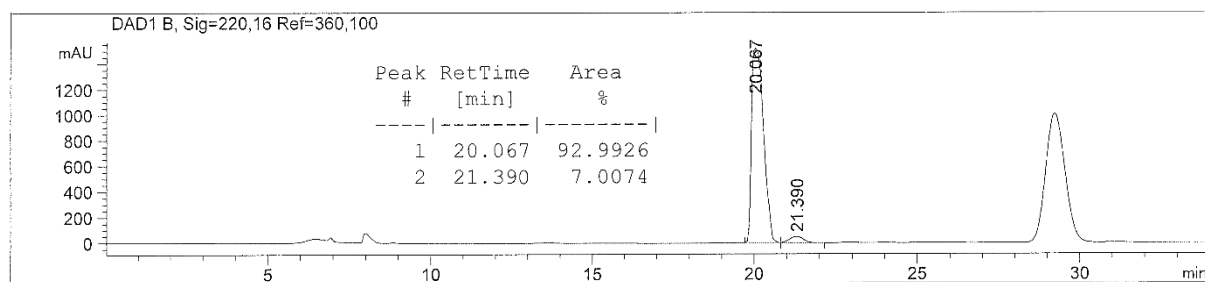

**Figure S168.** HPLC trace of: (a) racemic and (b) enantioenriched product (86% (*S,S*) ee using **4c** catalytic system; Scheme 5). The peak at ca 29 min corresponds to the unreacted starting material (**S79**).

**Ethyl 2-methyl-3-phenylbutanoate (from S80).**<sup>47</sup> Enantiomeric excess determined by HPLC using

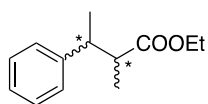

Chiralcel OJ-H column (hexane/2-propanol=95/5, 0.5 mL/min, 220 nm).  $t_R$  12.2 min (*R,R*);  $t_R$  14.0 min (*S,S*).  $^1\text{H NMR}$  ( $\text{CDCl}_3$ ),  $\delta$ : 0.93 (d, 3H,  $J=6.8$  Hz), 1.25 (d, 3H,  $J=6.9$  Hz), 1.29 (t, 3H,  $J=7.1$  Hz), 2.54-2.62 (m, 1H), 2.88-2.92 (m, 1H), 4.18 (q, 2H,  $J=7.1$  Hz), 7.16-7.23 (m, 3H), 7.26-7.32 (m, 2H).

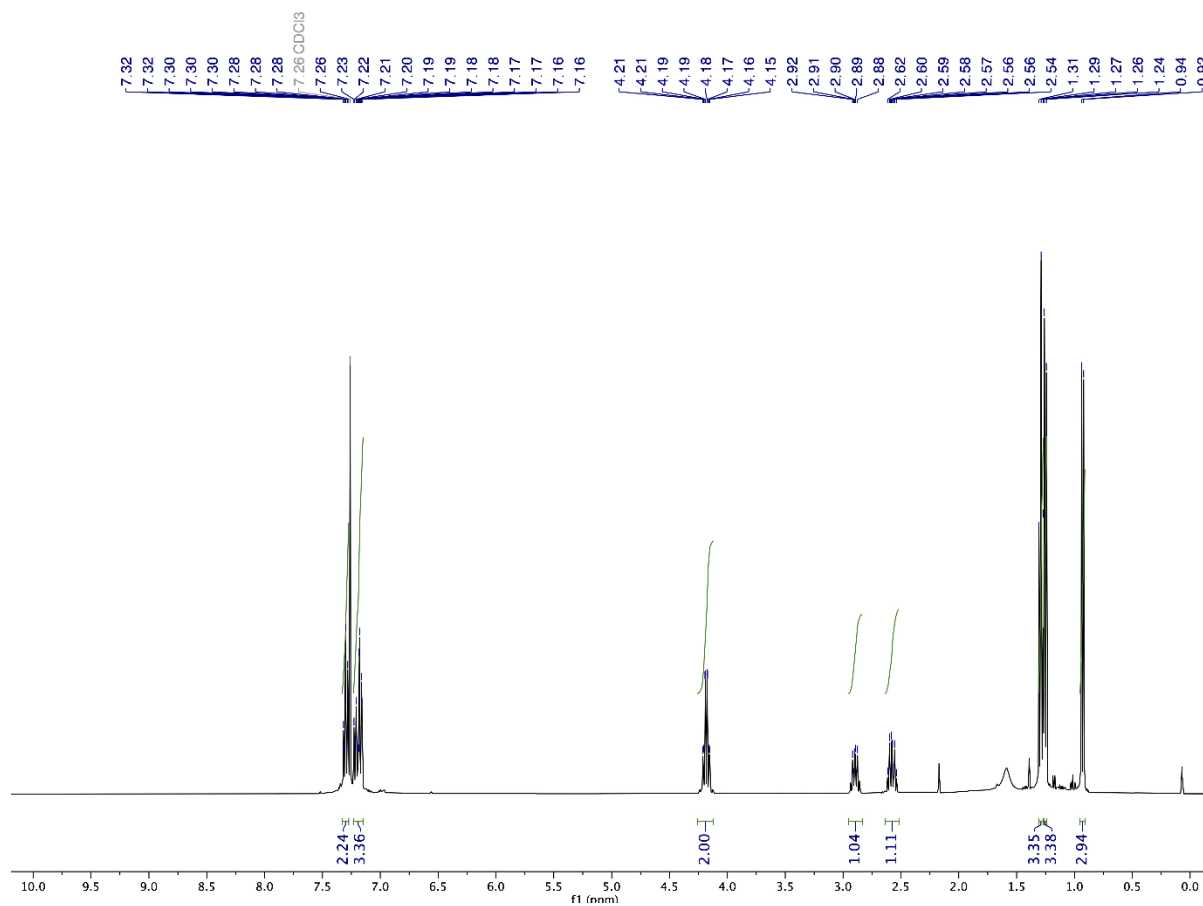

**Figure S169.**  $^1\text{H NMR}$  spectrum of ethyl 2-methyl-3-phenylbutanoate (from S80) in  $\text{CDCl}_3$ .

(a)

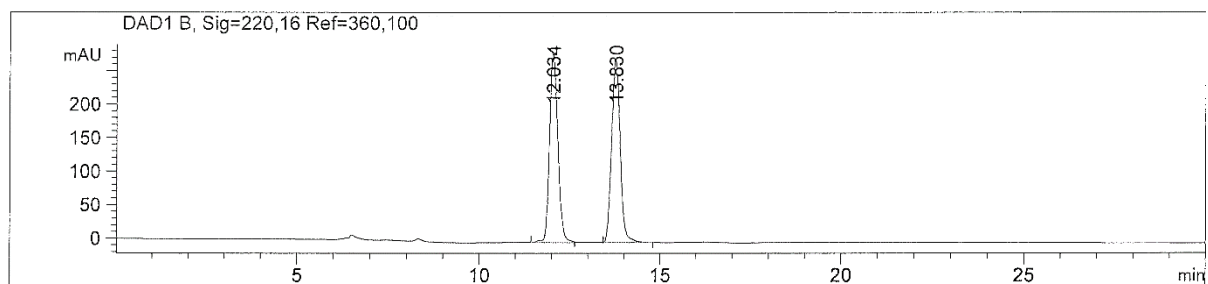

(b)

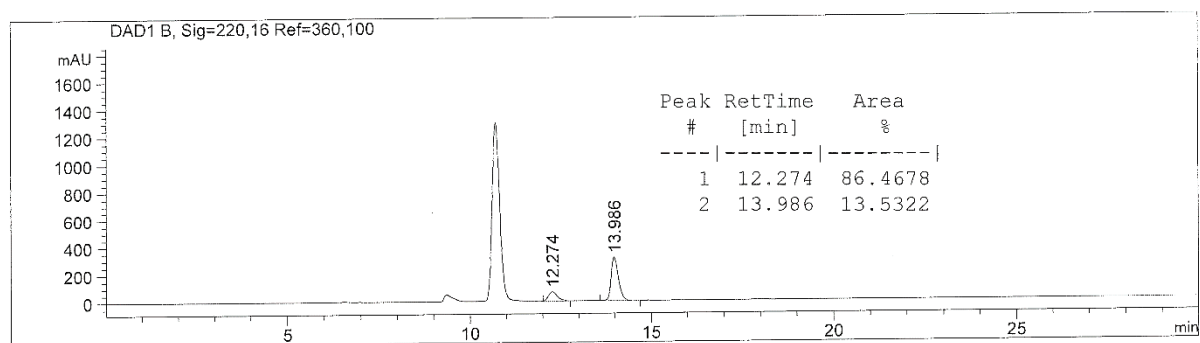

**Figure S170.** HPLC trace of: (a) racemic and (b) enantioenriched product (73% (*S,S*) ee using **4c** catalytic system; Scheme 5). The peak at ca 11 min corresponds to the unreacted starting material (**S80**).

**Ethyl 3-methyl-2-phenylbutanoate (from S81).**<sup>48</sup> Enantiomeric excess determined by HPLC using

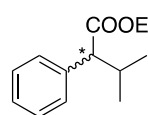

Chiracel OJ-H column (hexane/2-propanol=99/1, 1 mL/min, 210 nm).  $t_R$  5.2 min (*R*);  $t_R$  6.0 min (*S*).  $^1\text{H NMR}$  ( $\text{CDCl}_3$ ),  $\delta$ : 0.69 (d, 3H,  $J=6.7$  Hz), 1.03 (d, 3H,  $J=6.5$  Hz), 1.20 (t, 3H,  $J=7.1$  Hz), 2.33 (dp, 1H,  $J=10.6$  Hz,  $J=6.6$  Hz), 3.12 (d, 1H,  $J=10.6$  Hz), 4.03-4.17 (m, 2H), 7.23-7.34 (m, 5H).

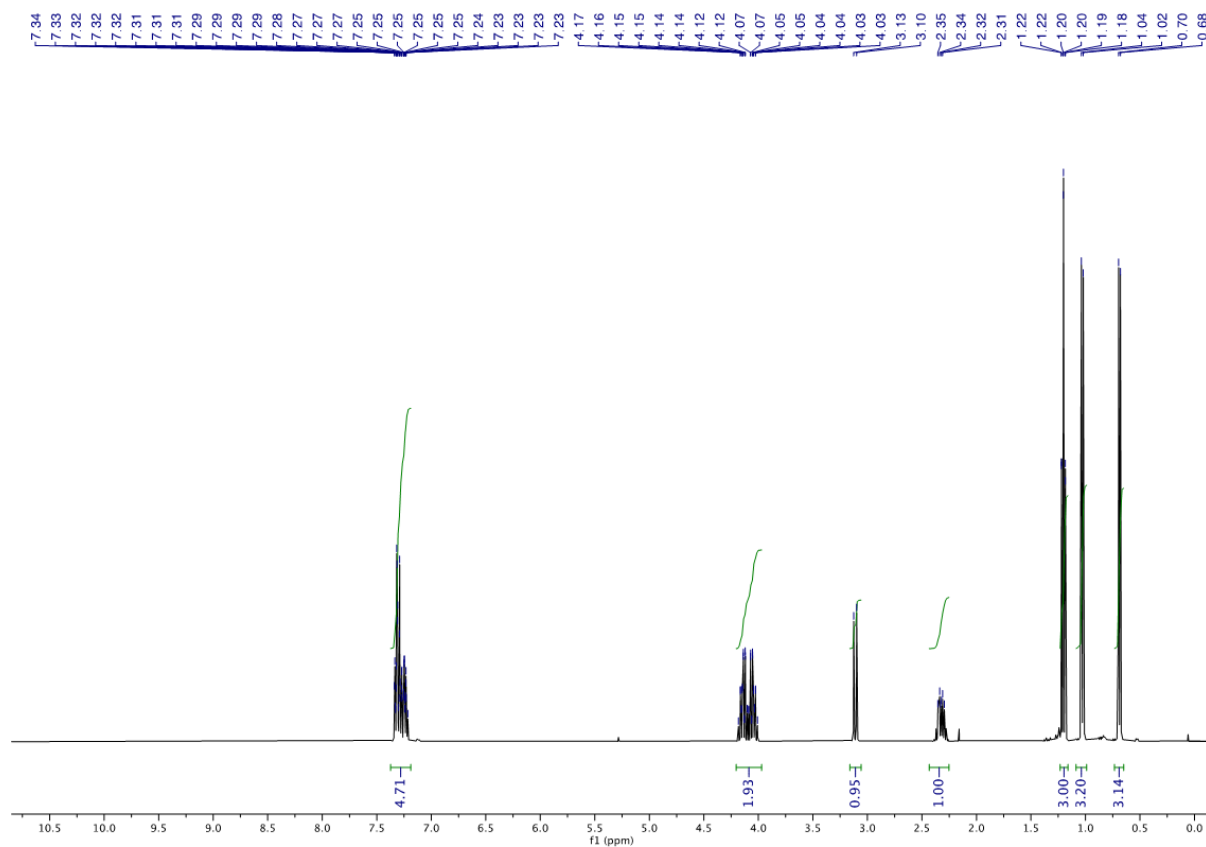

**Figure S171.**  $^1\text{H NMR}$  spectrum of ethyl 3-methyl-2-phenylbutanoate (from S81) in  $\text{CDCl}_3$ .

(a)

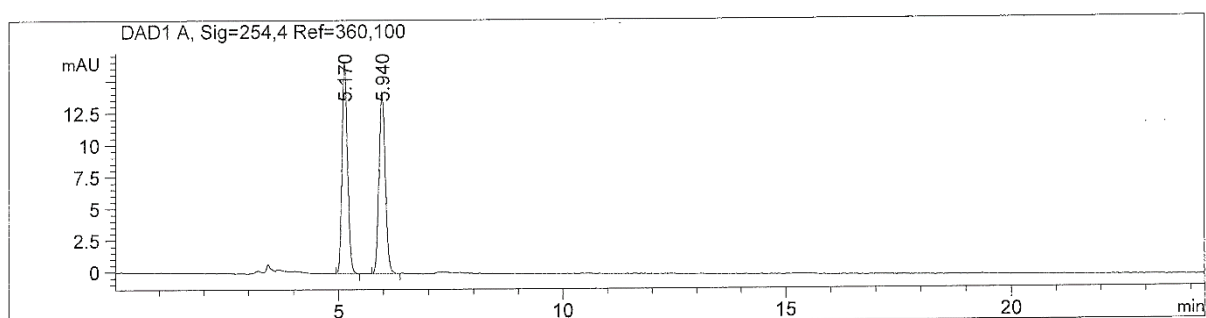

(b)

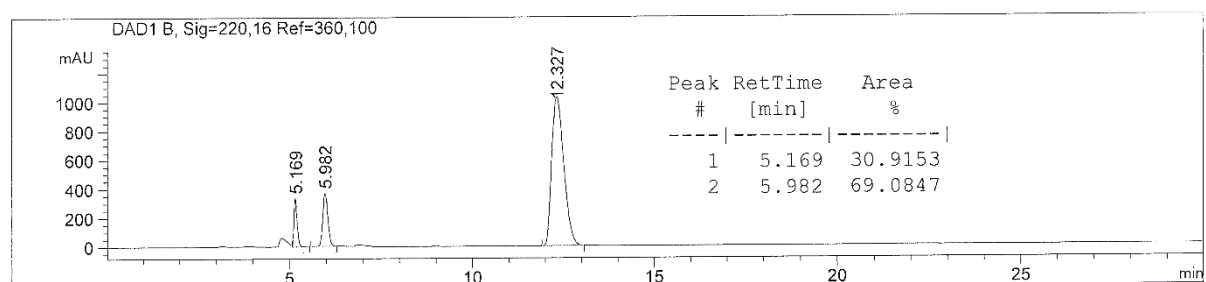

**Figure S172.** HPLC trace of: (a) racemic and (b) enantioenriched product (38% (*S*) ee using **4c** catalytic system; Scheme 5). The peak at 12.3 min corresponds to the unreacted starting material (**S81**).





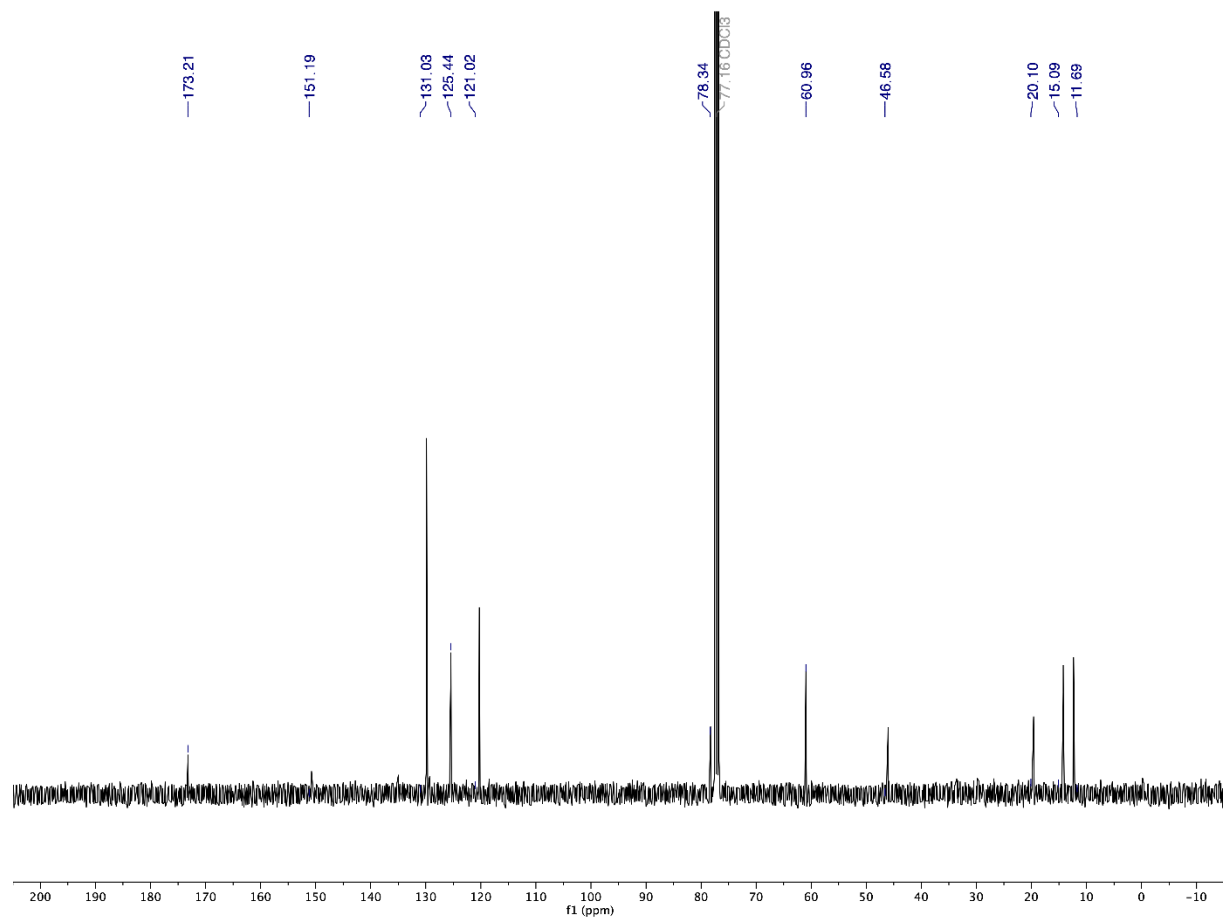

**Figure S175.**  $^{13}\text{C}\{^1\text{H}\}$  NMR spectrum of ethyl 3-((diphenylphosphoryl)oxy)-2-methylbutanoate (from **S82**) in  $\text{CDCl}_3$ .

(a)

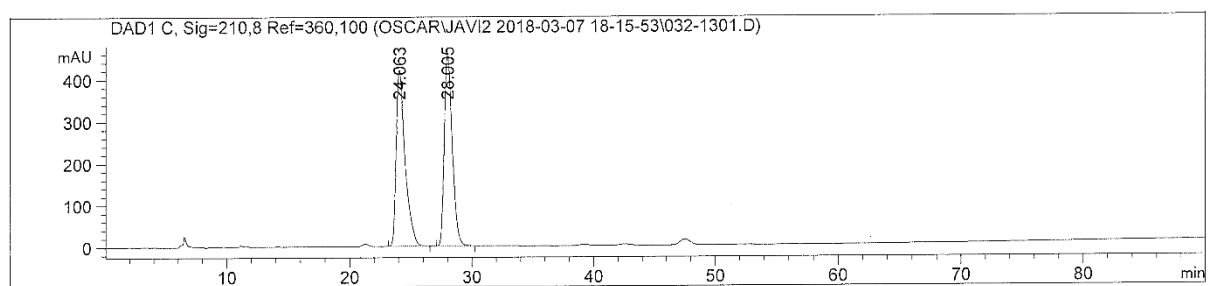

(b)

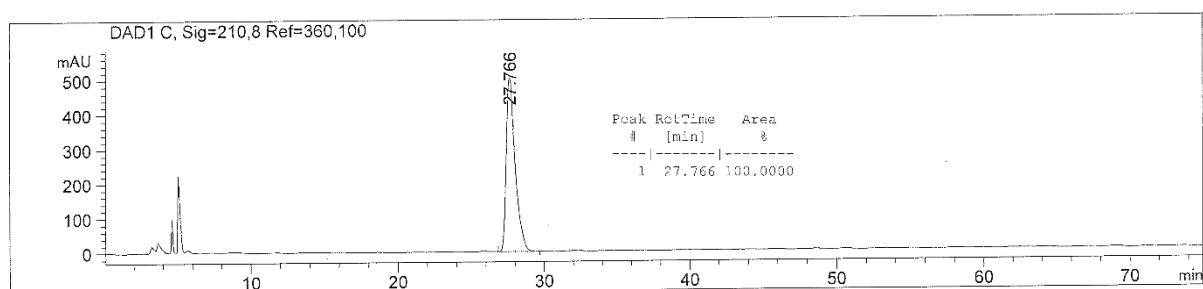

**Figure S176.** HPLC traces of (a) racemic and (b) enantioenriched product (>95% ee using **4c** catalytic system; Scheme 5).

**Butane-2,3-diyl dibenzene (from S83).**<sup>38</sup> Enantiomeric excess determined by HPLC using Chiralcel OJ-

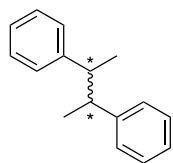

H column (hexane/2-propanol=98/2, 0.25 mL/min, 254 nm).  $t_R$  18.0 min (*R,R*);  $t_R$  19.1 min (*S,S*).  $^1\text{H NMR}$  ( $\text{CDCl}_3$ ),  $\delta$ : 1.26-1.31 (m, 6H), 2.91-2.98 (m, 2H), 7.00-7.02 (m, 4H), 7.07-7.11 (m, 2H), 7.14-7.19 (m, 4H).

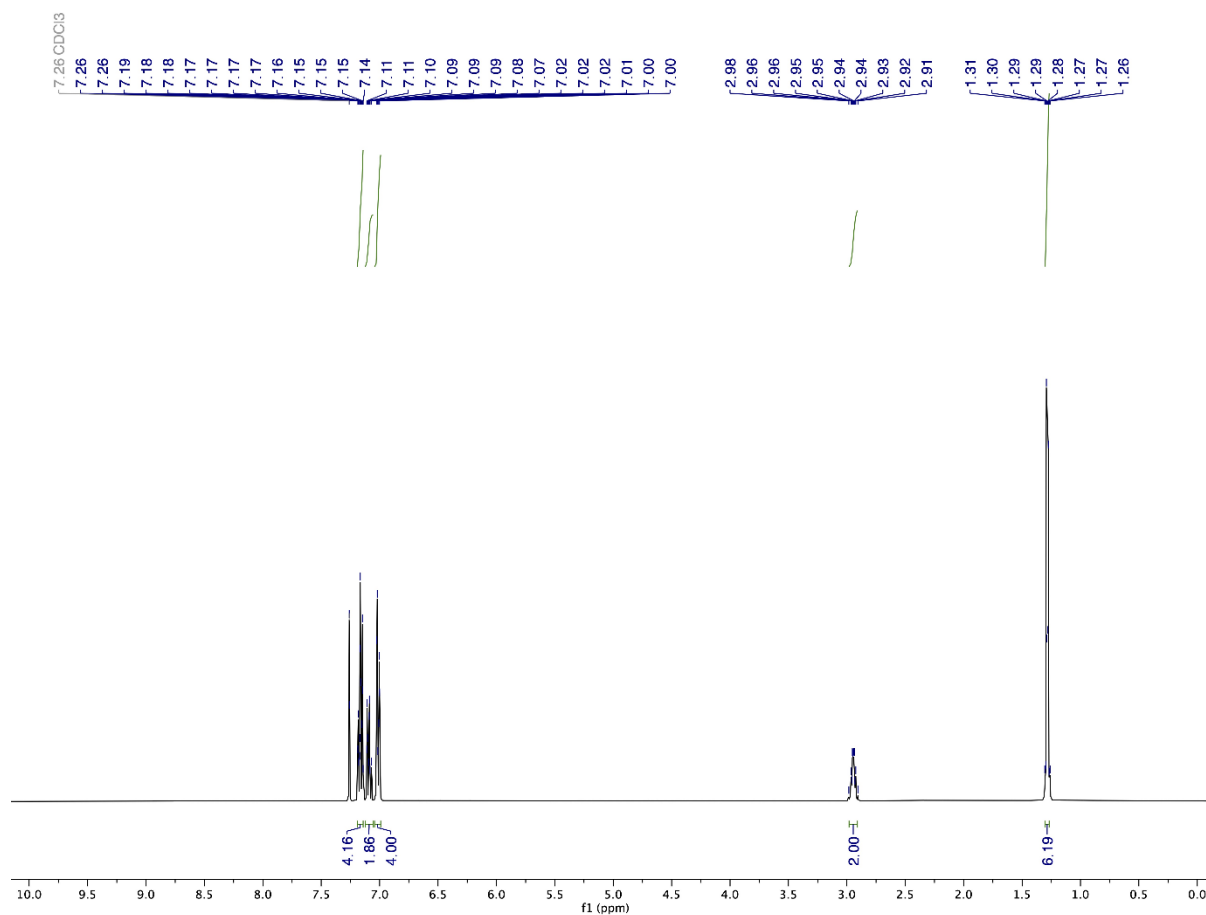

**Figure S177.**  $^1\text{H NMR}$  spectrum of Butane-2,3-diyl dibenzene (from S83) in  $\text{CDCl}_3$ .

(a)

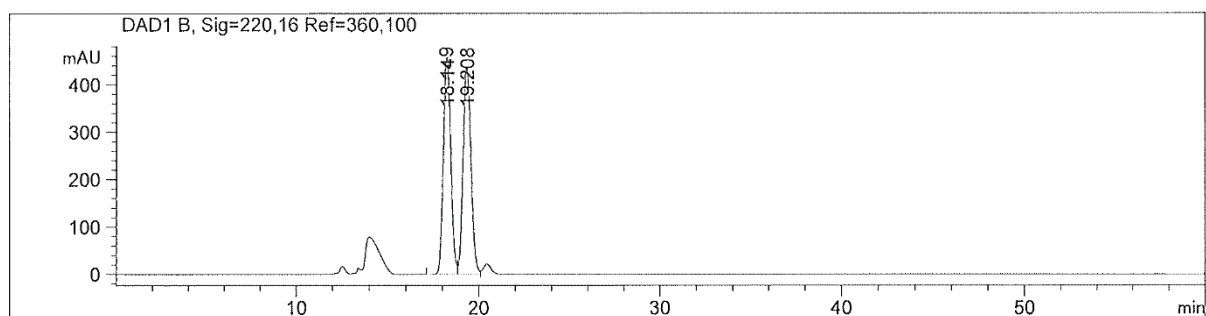

(b)

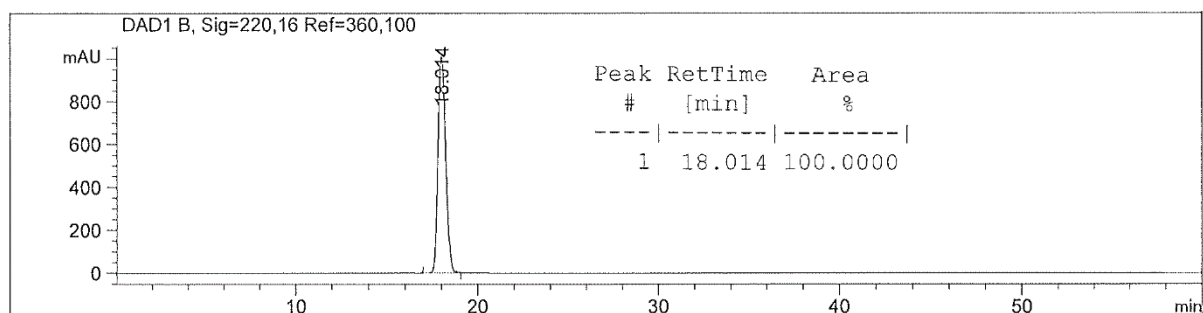

**Figure S178.** HPLC traces of (a) racemic and (b) enantioenriched product (99% (*R,R*) ee using **4c** catalytic system; Scheme 6).

**(2,3-Dimethylbutane-1,1-diyl)dibenzene (from S84).**<sup>38</sup> Enantiomeric excess determined by HPLC using Chiracel OJ-H column (hexane/2-propanol=99/1, 0.3 mL/min, 220 nm).  $t_R$  44.0 min (*S*);  $t_R$  47.8 min (*R*).  $^1\text{H NMR}$  ( $\text{CDCl}_3$ ),  $\delta$ : 0.70 (d, 3H,  $J=6.9$  Hz), 0.76 (d, 3H,  $J=6.9$  Hz), 0.91 (d, 3H,  $J=7.0$  Hz), 1.68-1.71 (m, 1H), 2.35-2.36 (m, 1H), 3.63 (d, 1H,  $J=11.6$  Hz), 7.12-7.16 (m, 2H), 7.22-7.33 (m, 8H).

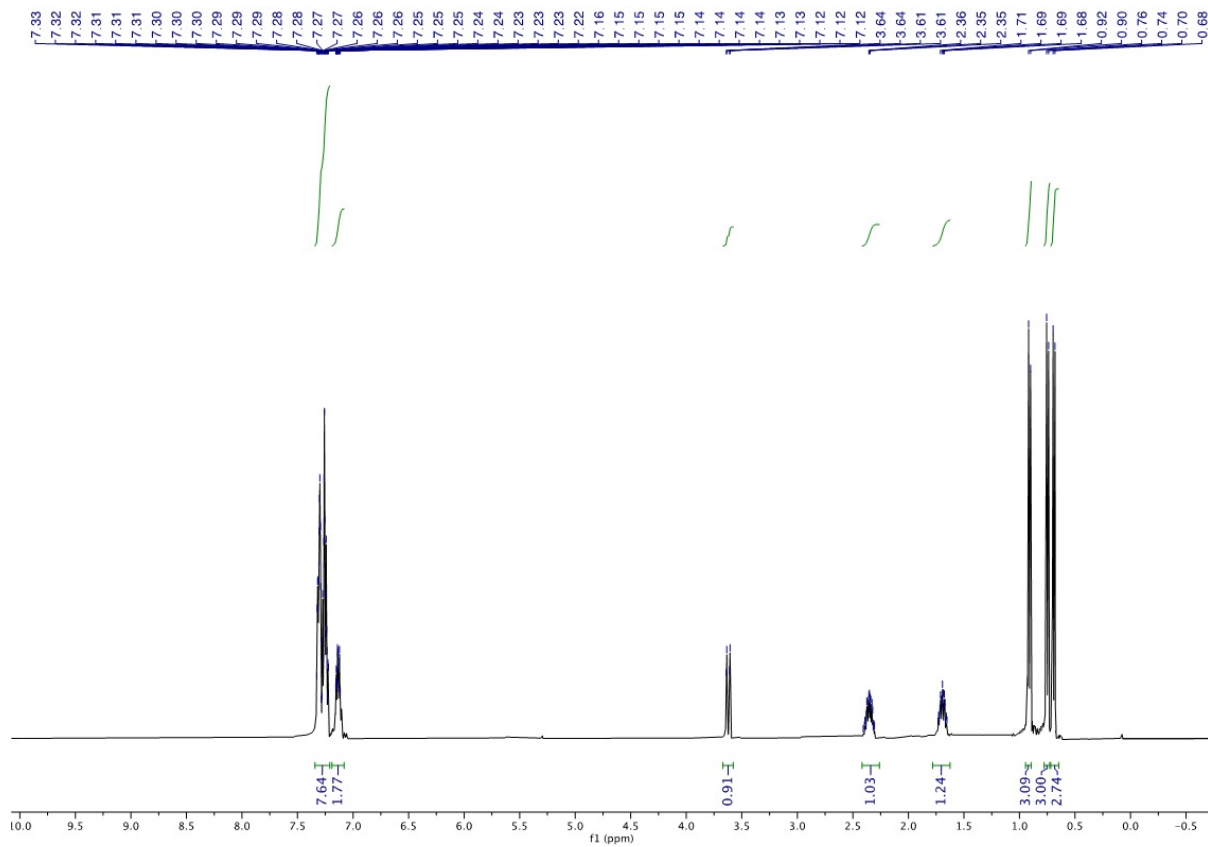

**Figure S179.**  $^1\text{H NMR}$  spectrum of (2,3-dimethylbutane-1,1-diyl)dibenzene (from S84) in  $\text{CDCl}_3$ .

(a)

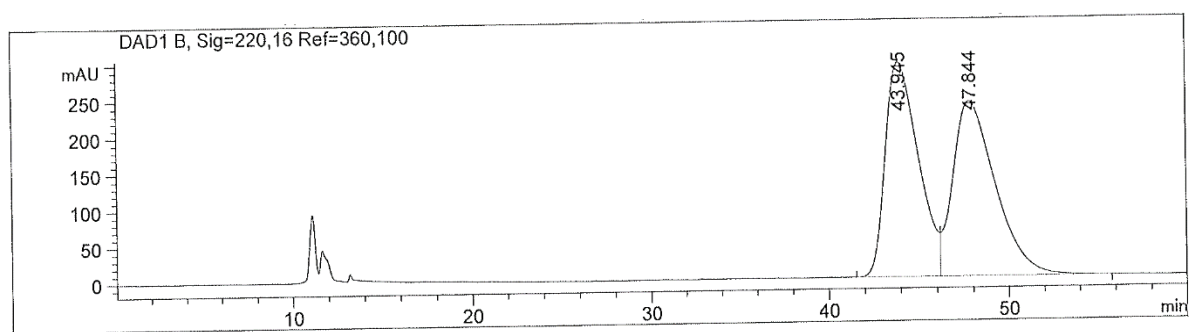

(b)

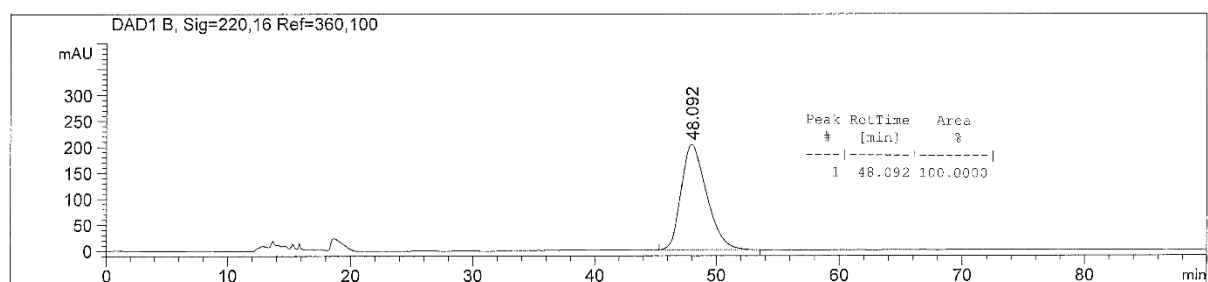

**Figure S180.** HPLC traces of (a) racemic and (b) enantioenriched product (>95% (*R*) ee using **4c** catalytic system; Scheme 6).

**(2-Methylbutane-1,1-diyl)dibenzene (from S85).**<sup>38</sup> Enantiomeric excess determined by HPLC using

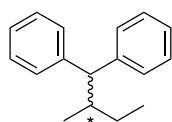

Chiralcel OJ-H column (hexane/2-propanol=98/2, 0.25 mL/min, 220 nm).  $t_R$  36.6 min (*S*);  $t_R$  39.9 min (*R*).  $^1\text{H NMR}$  ( $\text{CDCl}_3$ ),  $\delta$ : 0.84 (d, 3H,  $J= 6.6$  Hz), 0.87 (dd, 3H,  $J= 7.4$  Hz,  $J= 7.4$  Hz), 1.02-1.05 (m, 1H), 1.44-1.46 (m, 1H), 2.28-2.30 (m, 1H), 3.53 (d, 1H,  $J= 10.9$  Hz), 7.12-7.16 (m, 2H), 7.23-7.31 (m, 8H).

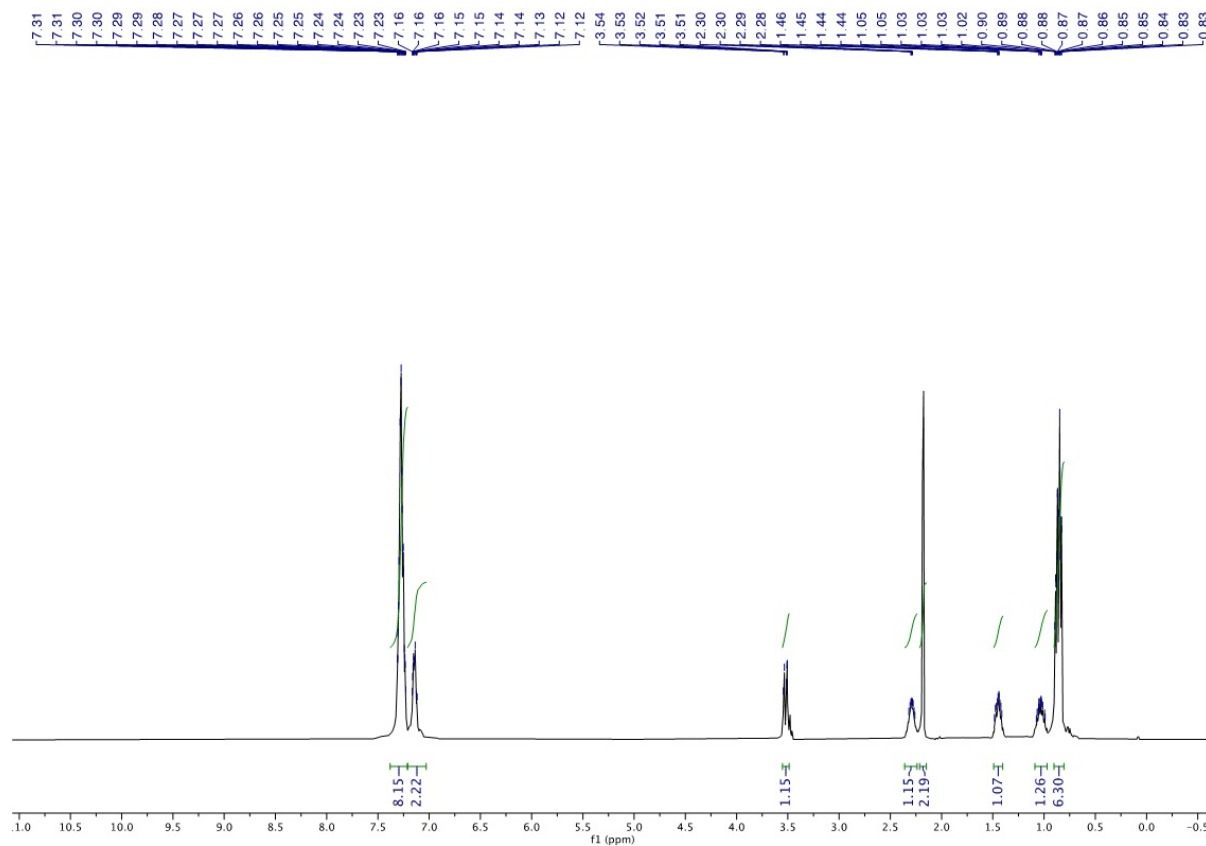

**Figure S181.**  $^1\text{H NMR}$  spectrum of (2-methylbutane-1,1-diyl)dibenzene (from S85) in  $\text{CDCl}_3$ .

(a)

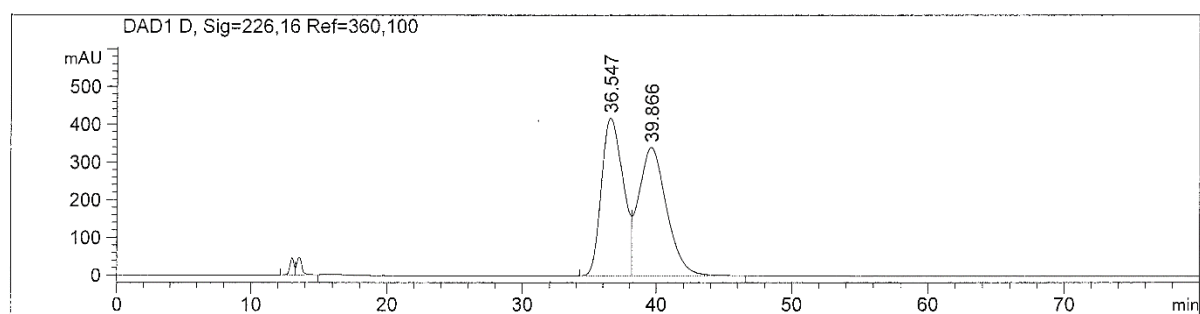

(b)

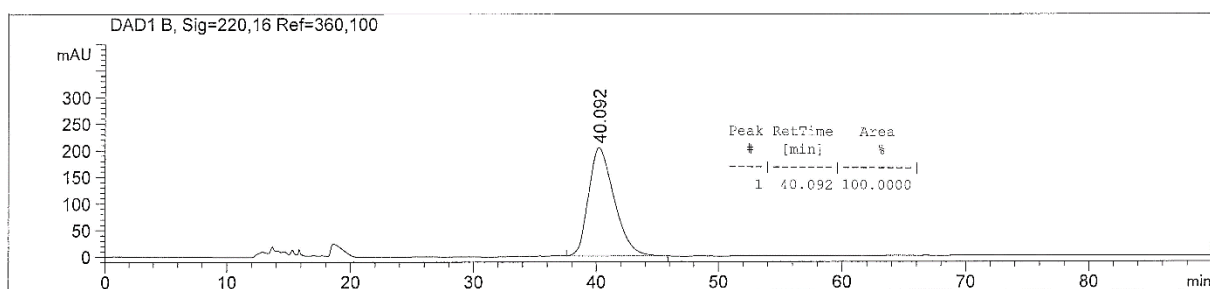

**Figure S182.** HPLC traces of (a) racemic and (b) enantioenriched product (>95% (*R*) ee using **4c** catalytic system; Scheme 6).



**1-Methoxy-4-(2-methyl-1-phenylpropyl)benzene (from S86).**<sup>38</sup> Enantiomeric excess determined by HPLC using Chiralcel IB column (hexane/2-propanol=98/2, 0.5 mL/min, 210 nm).  $t_R$  8.5 min (*S*);  $t_R$  8.8 min (*R*).  $^1\text{H NMR}$  ( $\text{CDCl}_3$ ),  $\delta$ : 0.87 (d, 3H,  $J= 8.2$  Hz), 0.88 (d, 3H,  $J= 8.3$  Hz), 2.39-2.48 (m, 1H), 3.36 (d, 1H,  $J= 10.8$  Hz), 3.76 (s, 3H), 6.80 (d, 2H,  $J= 8.7$  Hz), 7.13 (ddt, 1H,  $J= 6.5$  Hz,  $J= 5.4$  Hz,  $J= 2.6$  Hz), 7.19 (d, 2H,  $J= 8.6$  Hz), 7.24-7.26 (m, 4H).

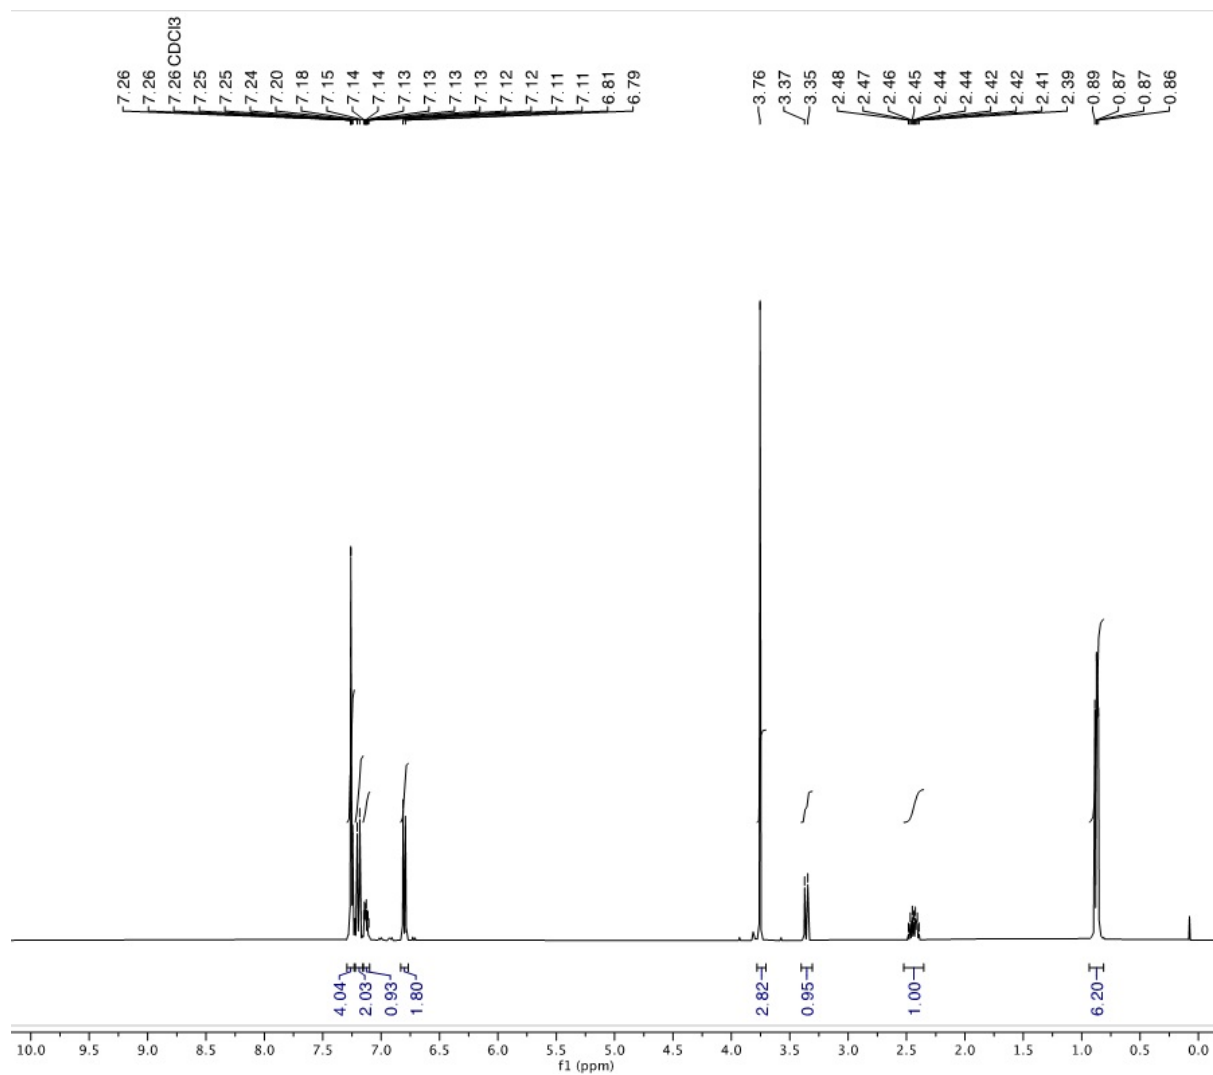

**Figure S183.**  $^1\text{H NMR}$  spectrum of 1-methoxy-4-(2-methyl-1-phenylpropyl)benzene (from S86) in  $\text{CDCl}_3$ .

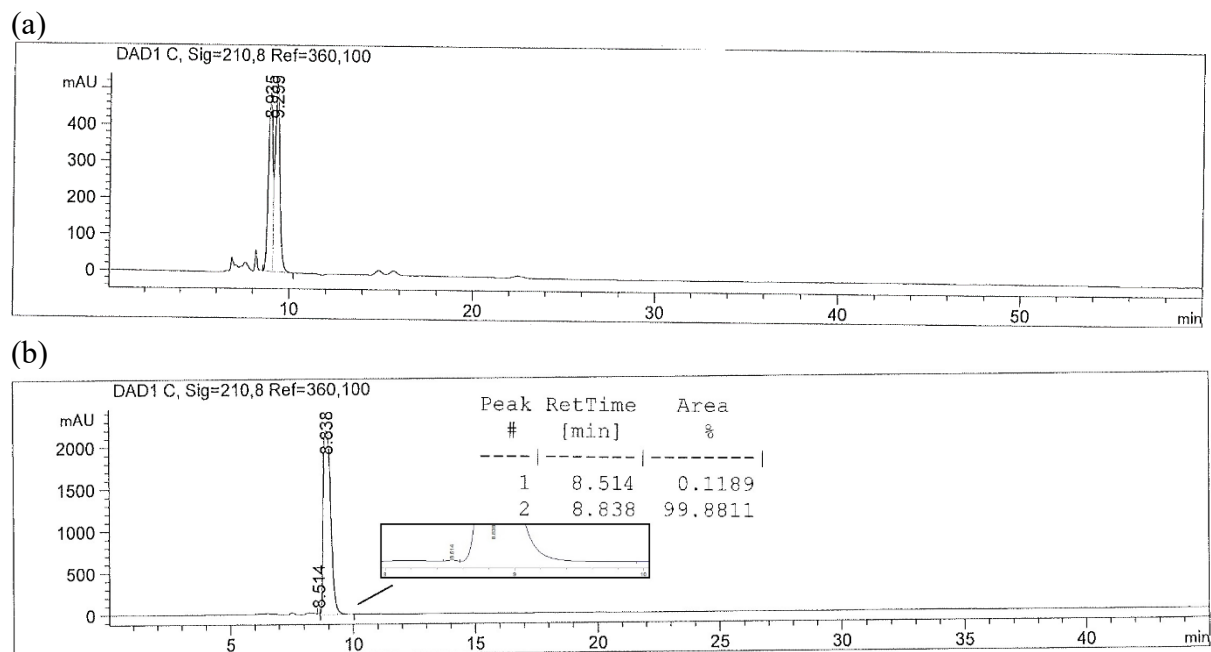

**Figure S184.** HPLC traces of (a) racemic and (b) enantioenriched product (>95% (*R*) ee using **4c** catalytic system; Scheme 6).

# 10. Cartesian coordinates

## Ir/4c with S2

### TSs for the $\sigma$ -methathesis pathway

#### A

|    |             |             |             |
|----|-------------|-------------|-------------|
| N  | 1.47649200  | 1.02250200  | 0.56677000  |
| P  | 1.00820000  | -1.95207900 | -0.58922300 |
| Ir | -0.32803100 | -0.06199100 | -0.45597700 |
| H  | -1.34925600 | 0.48519100  | 0.75632600  |
| C  | -1.52925800 | 1.62878400  | -1.33314000 |
| C  | -2.11064100 | 1.53148500  | -0.01274000 |
| C  | 2.40237800  | 2.56831300  | 2.06651200  |
| H  | 1.60129900  | 2.92062700  | 2.72282900  |
| H  | 3.30327700  | 3.15432300  | 2.23381100  |
| C  | 2.05295700  | 0.42044300  | 1.55371800  |
| O  | 2.70136200  | 1.18877100  | 2.43839800  |
| C  | 1.96077600  | 2.44064800  | 0.60005300  |
| C  | 2.07374800  | -1.07477800 | 1.82085900  |
| N  | 2.25548300  | -1.79748400 | 0.55095200  |
| H  | 2.80497400  | -2.64098700 | 0.66862300  |
| C  | 0.01426300  | -3.43891000 | -0.16976900 |
| H  | -0.83805400 | -3.50777400 | -0.84896200 |
| H  | 0.60630600  | -4.35497400 | -0.22467100 |
| H  | -0.36398100 | -3.30859700 | 0.84607700  |
| C  | 1.88919000  | -2.36097900 | -2.19184600 |
| O  | 0.82261600  | -2.71201400 | -3.24762100 |
| O  | 0.10005000  | -1.89969800 | -3.37204800 |
| H  | 1.31876000  | -2.87198700 | -4.21047500 |
| H  | 0.27994800  | -3.62875800 | -2.99983800 |
| C  | 2.71465500  | -1.15163400 | -2.65934100 |
| C  | 3.30936800  | -1.44476600 | -3.53093500 |
| C  | 2.07299100  | -0.32066700 | -2.95645000 |
| H  | 3.39801800  | -0.80305800 | -1.88111600 |
| C  | 2.83489400  | -3.56206600 | -1.96955900 |
| C  | 3.29266600  | -3.82393800 | -2.92899600 |
| H  | 3.64986000  | -3.31851600 | -1.28074700 |
| H  | 2.31562100  | -4.45269100 | -1.60561200 |
| H  | 0.24980800  | 0.13407100  | -1.96134800 |
| H  | -1.48930200 | -0.92119800 | -1.06363600 |
| C  | 3.15599900  | -1.49541400 | 2.84909700  |
| C  | 3.01119800  | -0.83678800 | 3.71110700  |
| C  | 4.59065100  | -1.30206800 | 2.33492400  |
| H  | 5.30306000  | -1.54625800 | 3.12836100  |
| H  | 4.81105600  | -1.95553300 | 1.48446200  |
| H  | 4.76986600  | -0.27053200 | 2.02425900  |
| C  | 2.91552400  | -2.93765000 | 3.32236400  |
| H  | 3.61982300  | -3.18969000 | 4.12012500  |
| H  | 1.90027100  | -3.06779000 | 3.71106200  |
| H  | 3.06428400  | -3.67052700 | 2.52090900  |
| H  | 1.09958600  | -1.30303700 | 2.27921400  |
| C  | 3.09940200  | 2.71450800  | -0.43575500 |
| C  | 4.31008300  | 1.79355100  | -0.19074800 |
| H  | 4.74711600  | 1.94004300  | 0.80181500  |
| H  | 4.03753700  | 0.73911000  | -0.29129700 |
| H  | 5.09088300  | 2.00657300  | -0.92699100 |
| C  | 3.53433700  | 4.18862000  | -0.30294900 |
| H  | 4.25860200  | 4.42900600  | -1.08765400 |
| H  | 2.67998600  | 4.86518000  | -0.41873300 |
| H  | 4.01284600  | 4.40553400  | 0.65702500  |
| H  | 1.13104800  | 3.11459900  | 0.38854600  |
| C  | 2.57273000  | 2.49522400  | -1.86497500 |
| C  | 2.06418600  | 1.53656800  | -1.95843800 |
| H  | 1.87224600  | 3.28338800  | -2.15044200 |
| H  | 3.40250900  | 2.51912200  | -2.57859500 |
| H  | -0.54160400 | -0.82017100 | 0.98577100  |
| C  | -3.47155100 | 0.89299900  | 0.12055100  |
| C  | -3.82876700 | 0.15957000  | 1.25783300  |
| C  | -4.45153600 | 1.10682700  | -0.86256300 |
| C  | -5.10860700 | -0.36729700 | 1.41765200  |
| H  | -3.09018800 | -0.02711400 | 2.03323600  |
| C  | -5.73443900 | 0.59342000  | -0.71686500 |
| H  | -4.22112000 | 1.69899900  | -1.74231300 |
| C  | -6.07449700 | -0.15155800 | 0.42224000  |
| H  | -5.33830900 | -0.94044300 | 2.30722400  |
| H  | -6.49355700 | 0.76354300  | -1.47303000 |
| C  | -1.84309100 | 2.64692200  | 0.99616400  |
| H  | -2.09513900 | 1.12359400  | -2.10916000 |
| H  | -0.79080100 | 2.92329900  | 1.03916600  |
| H  | -2.16865700 | 2.35602800  | 1.99627400  |
| O  | -7.35106600 | -0.61396300 | 0.46916100  |
| C  | -7.76085300 | -1.36514000 | 1.61176900  |
| H  | -7.68123800 | -0.77184600 | 2.53048200  |
| H  | -8.80550000 | -1.62543500 | 1.43955700  |
| H  | -7.17104600 | -2.28316100 | 1.71986300  |
| C  | -0.86163600 | 2.88868600  | -1.82434400 |
| H  | -0.16654000 | 3.32287800  | -1.10909100 |
| H  | -0.32207300 | 2.69753700  | -2.75208700 |
| H  | -1.63644500 | 3.64029600  | -2.02701200 |
| H  | -2.42299300 | 3.52436300  | 0.69074700  |

#### B

|    |             |             |             |
|----|-------------|-------------|-------------|
| N  | 0.14687400  | 0.83024900  | 0.17974700  |
| P  | -2.79255700 | -0.36892100 | -0.40384900 |
| Ir | -0.65674000 | -1.25657700 | -0.33820400 |
| H  | 0.52250300  | -1.50839800 | -1.48806600 |
| C  | 0.90284000  | -2.49536700 | 0.69292300  |
| C  | 1.51435400  | -2.32941400 | -0.60086400 |
| C  | 1.77172300  | 2.52437700  | 0.14402400  |
| C  | 2.49923600  | 2.31618600  | -0.64326100 |
| H  | 2.10807300  | 3.36184500  | 0.75127700  |
| C  | -0.26996400 | 1.85447000  | -0.48461300 |
| O  | 0.52698000  | 2.92958500  | -0.50297600 |
| C  | 1.37166300  | 1.26052800  | 0.92683400  |
| C  | -1.55839400 | 1.96751300  | -1.28184100 |
| N  | -2.66071500 | 1.31397000  | -0.55984700 |
| H  | -3.54792600 | 1.77392800  | -0.72933500 |

|   |             |             |             |
|---|-------------|-------------|-------------|
| C | -3.72160000 | -1.01395700 | -1.84891700 |
| H | -3.81737700 | -2.09912000 | -1.77013700 |
| H | -4.71114700 | -0.55956300 | -1.92652200 |
| H | -3.14239100 | -0.78072600 | -2.74427300 |
| C | -3.90896800 | -0.59744500 | 1.08484100  |
| C | -4.11640300 | -2.10794900 | 1.30970100  |
| H | -3.16566100 | -2.62451100 | 1.46819400  |
| H | -4.73427600 | -2.25066200 | 2.20241100  |
| H | -4.63515000 | -2.58285800 | 0.47141500  |
| C | -3.25088400 | 0.04128300  | 2.32014600  |
| H | -3.92196900 | -0.07426200 | 3.17778700  |
| H | -2.30401200 | -0.44102600 | 2.56989500  |
| H | -3.06744400 | 1.10803700  | 2.16963800  |
| C | -5.26992000 | 0.08767500  | 0.83007300  |
| H | -5.90149200 | -0.06000400 | 1.71210800  |
| H | -5.17083700 | 1.16842700  | 0.68662100  |
| H | -5.80298400 | -0.33560000 | -0.02471600 |
| H | -1.14761500 | -1.51315500 | 1.18486700  |
| H | -1.28319800 | -2.63653600 | -0.75634500 |
| C | -1.93146900 | 3.43772400  | -1.60899200 |
| H | -1.03329700 | 3.87584100  | -2.05445700 |
| C | -2.29503600 | 4.25455300  | -0.35924600 |
| H | -2.47220700 | 5.29772200  | -0.63687400 |
| H | -3.20635600 | 3.88165000  | 0.11921900  |
| H | -1.49110800 | 4.23218900  | 0.38024300  |
| C | -3.04575300 | 3.49377500  | -2.66543200 |
| H | -3.21821600 | 4.53059400  | -2.96775600 |
| H | -2.78142500 | 2.91858700  | -3.55870000 |
| H | -4.00111000 | 3.11006000  | -2.28829100 |
| H | -1.34903100 | 1.46624700  | -2.24049500 |
| C | 1.11569000  | 1.50221400  | 2.44641500  |
| C | 0.01268500  | 2.55289000  | 2.66712700  |
| H | 0.27315800  | 3.52065600  | 2.22619100  |
| H | -0.93648700 | 2.22433000  | 2.23412600  |
| H | -0.14517300 | 2.71239000  | 3.73819200  |
| C | 2.43866900  | 1.98001800  | 3.08156600  |
| H | 2.32635600  | 2.04189400  | 4.16850400  |
| C | 3.25345800  | 1.27917700  | 2.86605900  |
| H | 2.74264100  | 2.97103900  | 2.73101100  |
| H | 2.13448800  | 0.49233500  | 0.82252700  |
| C | 0.71134000  | 0.18449300  | 3.12907800  |
| H | -0.16561300 | -0.25842100 | 2.65717000  |
| H | 1.52961400  | -0.54312500 | 3.09238000  |
| H | 0.48108900  | 0.36245400  | 4.18446400  |
| H | -0.80061500 | -0.73292900 | -1.88882100 |
| C | 0.44238900  | 3.84104400  | 1.20856200  |
| H | -0.16894500 | -4.38324600 | 0.48629400  |
| H | 1.31844500  | -4.45817000 | 1.44729900  |
| H | -0.14561800 | -3.71197200 | 2.11894900  |
| C | 1.55226700  | -3.50783600 | -1.56962100 |
| H | 2.33354100  | -4.19541800 | -1.22715300 |
| H | 0.60196200  | -4.04090000 | -1.60388200 |
| H | 1.81079300  | -3.17805900 | -2.57789900 |
| C | 1.30509600  | -1.84442500 | 1.46111800  |
| C | 2.69143100  | -1.39720000 | -0.69992000 |
| C | 2.85994200  | -0.51247600 | -1.77804000 |
| C | 3.68673100  | -1.43879000 | 0.28393100  |
| C | 3.96175300  | 0.32644100  | -1.84834500 |
| H | 2.10026300  | -0.45615900 | -2.55251300 |
| C | 4.80098600  | -0.59831500 | 0.23058700  |
| C | 3.59634800  | -2.13199300 | 1.11427800  |
| C | 4.93770300  | 0.30101900  | -0.83548800 |
| H | 4.08382600  | 1.02539000  | -2.66904400 |
| H | 5.54422800  | -0.65468900 | 1.01573800  |
| O | 5.96031300  | 1.18042400  | -0.98189700 |
| C | 6.96007700  | 1.23562900  | 0.03690900  |
| H | 7.65795100  | 2.01423300  | -0.27137600 |
| H | 6.52387500  | 1.49997400  | 1.00767100  |
| H | 7.49452500  | 0.28254600  | 0.12504200  |

#### C

|    |             |             |             |
|----|-------------|-------------|-------------|
| N  | -0.01678500 | 0.88770400  | -0.34822900 |
| P  | -2.75977000 | -0.62810400 | 0.35074800  |
| Ir | -0.58290400 | -1.30669700 | -0.05319600 |
| H  | -1.36879800 | -1.18790100 | -1.47768300 |
| C  | 1.60942700  | -2.27667600 | -0.62779500 |
| C  | 0.71871900  | -1.99587300 | -1.73252700 |
| C  | 1.27998100  | 2.57106100  | -1.32583100 |
| H  | 1.77759300  | 2.15305400  | -2.20586800 |
| H  | 1.66552300  | 3.56745300  | -1.12066500 |
| C  | -0.74279300 | 1.64271200  | -1.10050700 |
| O  | -0.14016900 | 2.70803900  | -1.64598300 |
| C  | 1.28059000  | 1.60241300  | -0.13352000 |
| C  | -2.20546200 | 1.43610800  | -1.45026100 |
| N  | -2.93882600 | 0.93807000  | -0.27535900 |
| H  | -3.89607600 | 1.26962700  | -0.26100000 |
| C  | -3.94515300 | -1.74799300 | -0.49252600 |
| H  | -3.77047500 | -2.77226000 | -0.15646600 |
| H  | -4.98253500 | -1.46820600 | -0.29874900 |
| C  | -3.74609100 | -1.69672900 | -1.56470200 |
| C  | -3.37369300 | -0.47683800 | 2.11597900  |
| C  | -3.43581500 | -1.89098200 | 2.72476900  |
| H  | -2.46766600 | -2.39731900 | 2.65860000  |
| H  | -3.70228700 | -1.80948900 | 3.78373000  |
| H  | -4.19172700 | -2.51691400 | 2.24180200  |
| C  | -2.41333900 | 0.40581400  | 2.92910200  |
| H  | -2.84592700 | 0.58312300  | 3.91936900  |
| H  | -1.44640200 | -0.07983900 | 3.07077700  |
| C  | -2.25012300 | 1.37378000  | 2.44839800  |
| C  | -4.77658900 | 0.17146800  | 2.12087100  |
| H  | -5.15139600 | 0.17826900  | 3.14957600  |
| H  | -4.74476200 | 1.21226000  | 1.78394200  |
| H  | -5.50426000 | -0.37578200 | 1.51559800  |
| H  | 0.86219500  | -1.77438500 | 0.65496100  |
| H  | -1.05622100 | -2.79934700 | 0.09253500  |
| C  | -2.87616700 | 2.72465400  | -1.99535500 |
| C  | -2.22485700 | 3.07244900  | -2.80303500 |
| C  | -2.97582100 | 3.84060100  | -0.94419900 |
| H  | -3.39033300 | 4.74381100  | -1.40152300 |
| H  | -3.63380900 | 3.55945600  | -0.11558500 |
| H  | -1.99626200 | 4.08954800  | -0.52967000 |
| C  | -4.24815400 | 2.40572400  | -2.60875700 |
| C  | -4.65307000 | 3.29705600  | -3.09615800 |
| H  | -4.17998700 | 1.60977300  | -3.35739700 |

|   |             |             |             |
|---|-------------|-------------|-------------|
| H | -4.98044400 | 2.09679600  | -1.85342300 |
| H | -2.20759900 | 0.69953000  | -2.26951400 |
| C | 1.37250100  | 2.29212600  | 1.26260300  |
| C | 0.24978600  | 3.32712200  | 1.45799400  |
| H | 0.29389500  | 4.12893800  | 0.71409800  |
| H | -0.73704100 | 2.85902900  | 1.39709000  |
| H | 0.33731900  | 3.79021300  | 2.44565800  |
| C | 2.74708400  | 2.98675900  | 1.36042700  |
| H | 2.88241700  | 3.39813700  | 2.36575200  |
| H | 3.56046700  | 2.27793200  | 1.17327800  |
| H | 2.85069900  | 3.81656800  | 0.65414400  |
| H | 2.09507100  | 0.88813600  | -0.21618900 |
| C | 1.28465600  | 1.22894100  | 2.36979000  |
| H | 0.34788300  | 0.67799200  | 2.31097700  |
| H | 2.10412900  | 0.51021000  | 2.29007700  |
| H | 1.34567200  | 1.70533500  | 3.35388500  |
| H | -0.49950800 | -1.23466500 | 1.57011400  |
| C | 2.83998900  | -1.43138600 | -0.45658600 |
| C | 3.43330200  | -1.26887900 | 0.80199000  |
| C | 3.46172200  | -0.82177400 | -1.56154100 |
| C | 4.56823600  | -0.48241500 | 0.98188300  |
| C | 2.98013800  | -1.73172700 | 1.67399600  |
| C | 4.59538500  | -0.03582500 | -1.40059900 |
| H | 3.06322700  | -0.96314500 | -2.56006000 |
| C | 5.14865600  | 0.15777000  | -0.12480100 |
| H | 4.97747200  | -0.36301900 | 1.97694600  |
| H | 5.07034800  | 0.44114300  | -2.25113700 |
| C | 1.77153200  | -3.72385900 | -0.17546400 |
| H | 2.42838100  | -4.22340600 | -0.89639200 |
| H | 2.24359200  | -3.78446300 | 0.80614800  |
| H | 0.81881600  | -4.25044900 | -0.13927200 |
| C | 0.16854600  | -3.10824800 | -2.60287800 |
| H | 0.98852000  | -3.57005100 | -3.16819400 |
| H | -0.32695700 | -3.88834600 | -2.02431200 |
| H | -0.55585900 | -2.70610200 | -3.31339200 |
| H | 0.94986200  | -1.08612000 | -2.28174200 |
| O | 6.23037200  | 0.97269800  | -0.06507300 |
| C | 6.82180200  | 1.22880300  | -1.21074800 |
| H | 7.20392700  | 0.30792000  | 1.66597000  |
| H | 7.65094500  | 1.91087800  | 1.02270400  |
| H | 6.10660000  | 1.70416400  | 1.89241600  |

## D

|   |             |             |             |
|---|-------------|-------------|-------------|
| N | -1.58808900 | 1.15313300  | -0.19392000 |
| F | -1.07364000 | -2.03615200 | 0.03149100  |
| F | 0.27953800  | -0.18476400 | -0.28049500 |
| H | -0.21780700 | -0.65451000 | -1.76482200 |
| C | 2.06524800  | 1.45127900  | -0.60005000 |
| C | 1.36835600  | 1.05409600  | -1.79935500 |
| C | -2.93804300 | 3.02392700  | -0.64865400 |
| H | -2.60606800 | 3.53005600  | -1.55931700 |
| H | -3.69599600 | 3.62500800  | -0.15095200 |
| C | -2.66891200 | 0.80595500  | -0.80678900 |
| O | -3.56540900 | 1.77121400  | -1.04741600 |
| C | -1.76863700 | 2.57082600  | 0.24650200  |
| C | -3.02540400 | -0.58020500 | -1.31663300 |
| N | -2.67119100 | -1.59183300 | -0.31001300 |
| H | -3.31869700 | -2.37115000 | -0.30947600 |
| C | -0.59125000 | -3.39831900 | -1.09948500 |
| H | 0.43062900  | -3.71530900 | -0.87970600 |
| H | -1.27025500 | -4.24855200 | -1.01040200 |
| H | -0.62285500 | -3.01175000 | -2.11963800 |
| C | -1.17164200 | -2.79257900 | 1.74635600  |
| C | 0.24608600  | -3.21015700 | 2.18151900  |
| H | 0.92879900  | -2.35646100 | 2.20336100  |
| H | 0.19630900  | -3.63048400 | 3.19138600  |
| H | 0.67075000  | -3.97688700 | 1.52655200  |
| C | -1.74723900 | -1.75491500 | 2.72510700  |
| H | -1.79780400 | -2.19987400 | 3.72439300  |
| H | -1.12016000 | -0.86342400 | 2.78954800  |
| H | -2.75463600 | -1.44788800 | 2.43421400  |
| C | -2.09658200 | -4.03026600 | 1.72279400  |
| H | -2.16666100 | -4.42893100 | 2.74003300  |
| H | -3.11548700 | -3.78506100 | 1.40617600  |
| H | -1.71219800 | -4.83090800 | 1.08636600  |
| H | 1.24928200  | 0.86613100  | 0.59318300  |
| H | 1.48553100  | -1.18575200 | -0.39016800 |
| C | -4.52096600 | -0.71294100 | -1.70582100 |
| H | -4.72561200 | 0.12804300  | -2.37537900 |
| H | -5.46795800 | -0.60787600 | -0.49981500 |
| H | -6.50655600 | -0.62786400 | -0.84276100 |
| H | -5.33617400 | -1.44316800 | 0.19581400  |
| H | -5.31090200 | 0.32101300  | 0.05331600  |
| C | -4.76168700 | -2.00670900 | -2.49927800 |
| H | -5.79278300 | -2.03271600 | -2.86290500 |
| H | -4.09421800 | -2.07908700 | -3.36410400 |
| H | -4.61740500 | -2.90459700 | -1.88688200 |
| H | -2.43631600 | -0.70549600 | -2.23872900 |
| C | -2.02429200 | 2.72058900  | 1.77706100  |
| C | -3.26358600 | 1.91798200  | 2.21146200  |
| H | -4.17268300 | 2.26043000  | 1.70590900  |
| H | -3.13580500 | 0.85251400  | 2.00226500  |
| H | -3.42407700 | 2.03082100  | 3.28797400  |
| C | -2.22983000 | 4.21857400  | 2.08501600  |
| H | -2.33557600 | 4.36063900  | 3.16487500  |
| H | -1.37206400 | 4.81345000  | 1.75140700  |
| H | -3.12976800 | 4.62700800  | 1.61584800  |
| C | -0.86787600 | 3.13307700  | 0.00291200  |
| C | -0.79377600 | 2.23670000  | 2.56284500  |
| H | -0.61315200 | 1.17512700  | 2.40509200  |
| H | 0.10888400  | 2.77929500  | 2.26118300  |
| H | -0.94387200 | 2.40491600  | 3.63412300  |
| H | 0.36942000  | -0.32243500 | 1.33549600  |
| C | 3.40253600  | 0.82154500  | -0.30388900 |
| C | 3.79782700  | 0.52900200  | 1.01279100  |
| C | 4.32263000  | 0.60558400  | -1.33325000 |
| C | 5.05644200  | 0.01808600  | 1.28524600  |
| C | 3.09873200  | 0.67924400  | 1.83091200  |
| C | 5.59878200  | 0.09598900  | -1.07535300 |
| H | 4.06103900  | 0.85345200  | -2.35731300 |
| C | 5.97067900  | -0.20565300 | 0.23998400  |
| H | 5.35735500  | -0.22317400 | 2.29929100  |
| H | 6.28375000  | -0.05290200 | -1.90071500 |
| C | 1.96534400  | 2.89297100  | -0.11242800 |
| H | 2.68848500  | 3.48652400  | -0.73033300 |
| H | 0.96739400  | 3.31223100  | -0.21626500 |
| H | 2.28518100  | 2.98678200  | 0.92662800  |
| C | 0.54290800  | 2.02144900  | -2.61872800 |
| H | -0.15947100 | 2.60478500  | -2.02360000 |
| H | 1.20928000  | 2.72624900  | -3.13251400 |

## E

|    |             |             |             |
|----|-------------|-------------|-------------|
| H  | -0.02929400 | 1.47966200  | -3.37382000 |
| H  | 1.88917700  | 0.31208600  | -2.39541000 |
| O  | 7.17675100  | -0.71086000 | 0.61070900  |
| C  | 8.14215600  | -0.97527200 | -0.40657200 |
| H  | 9.01437800  | -1.38134900 | 0.10637700  |
| H  | 7.67993500  | -1.71113100 | -1.12945000 |
| H  | 8.42714100  | -0.05843200 | -0.93653000 |
| N  | -0.47346500 | 1.10579100  | -0.63388300 |
| F  | -2.31521000 | -1.12071500 | 0.75700900  |
| Ir | -0.46173600 | -1.21157900 | -0.61590500 |
| H  | -0.32608400 | -1.09574700 | -2.28269000 |
| C  | 1.73338300  | -1.80090500 | -1.16440200 |
| C  | 1.11500600  | -1.35875800 | -2.39100200 |
| C  | -0.08234200 | 3.00537800  | -1.94114400 |
| H  | 0.04765200  | 2.67178800  | -2.97509800 |
| H  | 0.15669000  | 4.06367700  | -1.85980000 |
| C  | -1.58519200 | 1.68308700  | -0.94519900 |
| O  | -1.49839900 | 2.84597600  | -1.60574600 |
| C  | 0.61339100  | 2.09141000  | -0.92162500 |
| C  | -2.98469500 | 1.16390800  | -0.67473500 |
| N  | -3.00767500 | 0.42372300  | 0.59681400  |
| H  | -3.90530600 | 0.50699900  | 1.06065600  |
| C  | -3.56138000 | -2.36327000 | 0.23575200  |
| H  | -3.12300300 | -3.36224700 | 0.28125000  |
| H  | -4.45950300 | -2.32288500 | 0.85558700  |
| H  | -3.82623200 | -2.14845100 | -0.80155400 |
| C  | -2.09439400 | -1.33990600 | 2.60393900  |
| C  | -1.60174700 | -2.77663800 | 2.86066200  |
| H  | -0.67753300 | -2.98739400 | 2.31430500  |
| H  | -1.39689600 | -2.89398000 | 3.92992900  |
| H  | -2.34982400 | -3.52569500 | 2.58486600  |
| C  | -1.05848700 | -0.32531300 | 3.11810400  |
| H  | -0.99554800 | -0.40428400 | 4.20863000  |
| H  | -0.06725400 | -0.52753100 | 2.70785800  |
| H  | -1.33759500 | 0.70066000  | 2.86361900  |
| C  | -3.43836500 | -1.10139400 | 3.32638800  |
| H  | -3.29120200 | -1.27583400 | 4.39719000  |
| H  | -3.78689600 | -0.06984300 | 3.21542500  |
| H  | -4.22730900 | -1.78109900 | 2.99359000  |
| H  | 0.29503300  | -1.37432800 | 0.81361200  |
| H  | -0.63936700 | -2.76720000 | -0.65498900 |
| C  | -4.05631100 | 2.28649600  | -0.67577400 |
| H  | -3.91696700 | 2.81920200  | -1.62160200 |
| C  | -3.87962600 | 3.29134100  | 0.47129300  |
| H  | -4.64958100 | 4.06577000  | 0.40748100  |
| H  | -3.97355200 | 2.81069100  | 1.45050900  |
| H  | -2.90438900 | 3.78052700  | 0.42545900  |
| C  | -5.46998200 | 1.68373500  | -0.68707000 |
| H  | -6.21020000 | 2.47854100  | -0.81490700 |
| H  | -5.59571400 | 0.96645200  | -1.50472000 |
| H  | -5.71386100 | 1.17116400  | 0.25095400  |
| H  | -3.21892800 | 0.50850600  | -1.52869000 |
| C  | 1.10249800  | 2.82889700  | 0.36606100  |
| C  | -0.02223800 | 3.65441200  | 1.01731300  |
| H  | -0.43058700 | 4.41682900  | 0.34690800  |
| H  | -0.84270000 | 3.01102000  | 1.34957400  |
| H  | 0.36732300  | 4.16965100  | 1.90075600  |
| C  | 2.27316100  | 3.75120900  | -0.02940100 |
| H  | 2.67815000  | 4.23808300  | 0.86347000  |
| H  | 3.08255700  | 3.17676500  | -0.49295200 |
| H  | 1.97105200  | 4.54218300  | -0.72340400 |
| H  | 1.46348400  | 1.56736100  | -1.36063300 |
| C  | 1.61069800  | 1.79687700  | 1.38121200  |
| H  | 0.83963300  | 1.06237400  | 1.61317400  |
| H  | 2.47828800  | 1.26750600  | 0.99380900  |
| H  | 1.90702000  | 2.29602900  | 2.31007800  |
| H  | -1.69551800 | -1.09722600 | -1.71414900 |
| C  | 1.93594700  | -3.29721600 | -0.95794400 |
| H  | 1.12619800  | -3.89497700 | -1.37347500 |
| H  | 2.87409500  | -3.58857200 | -1.44754800 |
| H  | 2.02375700  | -3.54088500 | 0.10049100  |
| H  | 1.36625700  | -0.34141500 | -2.68637200 |
| C  | 2.81988400  | -0.97651800 | -0.54354800 |
| C  | 3.21282000  | -1.20480500 | 0.78403600  |
| C  | 3.58617700  | -0.06695100 | -1.29495800 |
| C  | 4.30951500  | -0.56404400 | 1.35269200  |
| H  | 2.62706000  | -1.87533400 | 1.40425100  |
| C  | 4.67257900  | 0.59958900  | -0.73797500 |
| H  | 3.36106500  | 0.10981800  | -2.34171000 |
| C  | 5.04853900  | 0.35539300  | 0.59055400  |
| H  | 4.56301200  | -0.76614900 | 2.38583700  |
| H  | 5.25856200  | 1.29879900  | -1.32502900 |
| C  | 0.92150900  | -2.30173300 | -3.57349900 |
| H  | 0.40860500  | -3.22098400 | -3.29036500 |
| H  | 0.34725100  | -1.81689700 | -4.36647000 |
| H  | 1.90803300  | -2.56341500 | -3.97069500 |
| O  | 6.12651400  | 1.04747400  | 1.04090000  |
| C  | 6.54896200  | 0.84559600  | 2.38975600  |
| H  | 6.84014300  | -0.19655000 | 2.56662600  |
| H  | 7.41570800  | 1.49165200  | 2.53116500  |
| H  | 5.76395100  | 1.12975600  | 3.10064800  |

## F

|    |             |             |             |
|----|-------------|-------------|-------------|
| N  | 1.77717100  | -1.07359400 | -0.13933100 |
| P  | 0.71086200  | 1.97800200  | -0.13664100 |
| Ir | -0.25020600 | -0.04191300 | -0.70227500 |
| H  | -0.34402000 | -0.83171000 | -2.18523100 |
| C  | -1.87333400 | -1.67451700 | -0.47223000 |
| C  | -1.33759200 | -1.85826200 | -1.79989700 |
| C  | 3.45118300  | -2.70021500 | -0.34141300 |
| H  | 3.26877300  | -3.24898400 | -1.27004900 |
| H  | 4.24064100  | -3.18636200 | 0.22749600  |
| C  | 2.86301900  | -0.56096200 | -0.61568200 |
| O  | 3.92804300  | -1.368470   |             |

|   |             |             |             |
|---|-------------|-------------|-------------|
| H | -1.44651500 | 3.87678700  | 0.80173800  |
| C | 0.61885100  | 1.75712200  | 2.65248300  |
| H | 0.46255200  | 2.25813100  | 3.61367400  |
| H | -0.03833700 | 0.88701000  | 2.61782700  |
| C | 1.65489400  | 1.41170000  | 2.61162500  |
| H | 1.14437500  | 4.02727500  | 1.72489100  |
| H | 0.84379600  | 4.48663100  | 2.673396100 |
| H | 2.21396700  | 3.80534700  | 1.79458900  |
| H | 0.98685700  | 4.77300000  | 0.94165100  |
| H | -0.69711600 | 0.01980000  | 0.85346100  |
| H | -1.50808500 | 0.79262000  | -1.11832900 |
| C | 4.55702200  | 1.25780100  | -1.24907100 |
| H | 4.99142100  | 0.46995200  | -1.87262300 |
| C | 5.33308400  | 1.30133300  | 0.07613400  |
| H | 6.38948500  | 1.50515500  | -0.12178700 |
| C | 4.96576000  | 2.09191000  | 0.73868800  |
| H | 5.26412300  | 0.35232700  | 0.61153800  |
| C | 4.68217000  | 2.58212200  | -2.01881500 |
| H | 5.73497900  | 2.79625000  | -2.22317400 |
| H | 4.15146700  | 2.54299500  | -2.97577200 |
| H | 4.28725700  | 3.43220700  | -1.45049000 |
| C | 2.60769600  | 0.92874800  | -2.07540400 |
| C | 2.35204000  | -2.34855600 | 1.99155900  |
| C | 3.41700800  | -1.30836700 | 2.38870800  |
| H | 4.39800900  | -1.53884500 | 1.96201800  |
| H | 3.13248900  | -0.30183900 | 2.06900200  |
| C | 3.52917200  | -1.29281600 | 3.47699800  |
| C | 2.78801500  | -3.74617500 | 2.47758800  |
| H | 2.81740600  | -3.76040100 | 3.57162400  |
| H | 2.08079200  | -4.51755200 | 2.15246600  |
| H | 3.78477400  | -4.02557000 | 2.12311400  |
| H | 1.39316800  | -3.14060300 | 0.21017200  |
| C | 1.01856400  | -1.99766500 | 2.67546700  |
| H | 0.55780800  | -1.11902600 | 2.22519300  |
| H | 0.31129100  | -2.82787000 | 2.60789000  |
| H | 1.18567900  | -1.79550000 | 3.73831100  |
| C | 0.49128600  | 0.38304800  | -2.12033600 |
| C | -0.55700000 | -3.09766400 | -2.20002900 |
| H | 0.25204500  | -3.32426200 | -1.50771800 |
| H | -1.24130300 | -3.95293500 | -2.21607100 |
| H | -0.12932300 | -2.98073700 | -3.19812800 |
| H | -1.60207500 | -2.73207700 | 0.57977400  |
| H | -2.29002100 | -3.57008200 | 0.40809600  |
| H | -0.58651400 | -3.11752200 | 0.54624800  |
| H | -1.79087200 | -2.34368700 | 1.57981900  |
| C | -1.97105500 | -1.46351400 | -2.59324500 |
| C | -3.22622500 | -1.03231100 | -0.32754500 |
| C | -3.55978700 | -0.29306200 | 0.81542900  |
| C | -4.23170500 | -1.23114900 | -1.28866500 |
| C | -4.82666600 | 0.25644300  | 0.99497800  |
| C | -2.79756400 | -0.11254100 | 1.56659100  |
| C | -5.50219500 | -0.68790700 | -1.12837300 |
| C | -4.03795800 | -1.83952500 | -2.16671800 |
| C | -5.81100000 | 0.06576200  | 0.01219400  |
| C | -5.03042000 | 0.83514200  | 1.88756400  |
| H | -6.27533700 | -0.84680800 | -1.87290600 |
| O | -7.07664900 | 0.56106700  | 0.07477200  |
| C | -7.44817800 | 1.32894400  | 1.21831100  |
| H | -8.48740700 | -1.61871500 | 1.06001500  |
| H | -7.37256700 | 0.73922100  | 2.13984400  |
| H | -6.83085400 | 2.23044800  | 1.31357900  |

**G**

|    |             |             |             |
|----|-------------|-------------|-------------|
| N  | -1.59467500 | -0.87730200 | 0.57859900  |
| P  | -0.55832500 | 1.89487400  | -0.71903900 |
| Ir | 0.22675100  | -0.27692300 | -0.68077200 |
| H  | 0.76246100  | 0.44593500  | 0.67716000  |
| C  | 1.34864200  | -2.38407000 | -0.85907300 |
| C  | 1.76614800  | -1.66781000 | 0.31754900  |
| C  | -2.79743000 | -2.12635200 | 2.16544900  |
| H  | -2.11476400 | -2.63797900 | 2.84978600  |
| C  | -3.81502700 | -2.47015800 | 2.33856900  |
| C  | -1.98251300 | -0.13040900 | 1.55648600  |
| O  | -2.75653500 | -0.70527900 | 2.48606800  |
| C  | -2.32733900 | -2.17592900 | 0.69913900  |
| C  | -1.62622200 | 1.32773100  | 1.79031000  |
| N  | -1.69549300 | 2.07389900  | 0.52477800  |
| H  | -1.99927300 | 3.03022400  | 0.66411500  |
| C  | 0.81945400  | 3.07367500  | -0.43314400 |
| H  | 1.56397800  | 2.96013100  | -1.22405800 |
| H  | 0.47080000  | 4.10767200  | -0.39791000 |
| H  | 1.28628200  | 2.81141500  | 0.51784500  |
| C  | -1.45781400 | 2.50254000  | -2.24810100 |
| C  | -0.49659000 | 2.39813700  | -3.44795400 |
| H  | -0.14834100 | 1.37185300  | -3.59488100 |
| H  | -1.02566500 | 2.71023600  | -4.35433400 |
| H  | 0.37608700  | 3.04850000  | -3.33553900 |
| C  | -2.70281200 | 1.63127600  | -2.48463700 |
| C  | -3.22507800 | 1.99297100  | -3.37657500 |
| H  | -2.43898700 | 0.58570900  | -2.65371900 |
| C  | -3.39351400 | 1.68101500  | -1.63924900 |
| C  | -1.89912400 | 3.97001200  | -2.05240600 |
| H  | -2.43195900 | 4.29442100  | -2.95229400 |
| H  | -2.59138200 | 4.08807600  | -1.21269800 |
| H  | -1.05524000 | 4.65019400  | -1.91283300 |
| H  | 0.21445000  | -1.62885600 | -1.65472500 |
| H  | 1.46841400  | 0.24751400  | -1.48880800 |
| C  | -2.52354500 | 1.99935000  | 2.86218300  |
| H  | -2.49922100 | 1.32771100  | 3.72570400  |
| C  | -3.98587000 | 2.15055400  | 2.41385400  |
| H  | -4.58807600 | 2.53464000  | 3.24240900  |
| H  | -4.08710700 | 2.85508600  | 1.58187900  |
| H  | -4.41123700 | 1.19392800  | 2.10075500  |
| C  | -1.92701600 | 3.34395500  | 3.30571600  |
| H  | -2.51290700 | 3.75484000  | 4.13274700  |
| H  | -0.89227800 | 3.23156200  | 3.64537900  |
| H  | -1.93940200 | 4.09189200  | 2.50440300  |
| C  | -0.60017700 | 1.30925600  | 2.19101600  |
| C  | -3.47278800 | -2.34564000 | -0.34451000 |
| C  | -4.50745400 | -1.21299000 | -0.22154600 |
| H  | -4.99548100 | -1.20443000 | 0.75860300  |
| H  | -4.04205100 | -0.23637700 | -0.38045600 |
| H  | -5.28980200 | -1.33766100 | -0.97642500 |
| C  | -4.14749200 | -3.71094800 | -0.09637900 |
| H  | -4.90948400 | -3.88922100 | -0.86130500 |
| H  | -3.41930200 | -4.52804900 | -0.15245200 |
| H  | -4.64614500 | -3.76691100 | 0.87595500  |
| H  | -1.62078900 | -2.99137200 | 0.55242700  |
| C  | -2.88577900 | -2.35388800 | -1.76584600 |

|   |             |             |             |
|---|-------------|-------------|-------------|
| H | -2.41635500 | -1.40174000 | -2.00601600 |
| H | -2.13171600 | -3.14026600 | -1.88023100 |
| H | -3.67857300 | -2.54060400 | -2.49723300 |
| H | -0.58280300 | -0.39429500 | -2.09569500 |
| C | 2.01217500  | -2.26758600 | -1.71284700 |
| C | 0.68442200  | -3.74474100 | -0.80846900 |
| H | -0.02796900 | -3.84866000 | 0.00701600  |
| H | 0.18375700  | -3.98714800 | -1.74797800 |
| H | 1.47731600  | -4.48467300 | -0.64758900 |
| C | 1.31422700  | -2.15089900 | 1.68901600  |
| H | 0.26413900  | -2.43901200 | 1.71727200  |
| H | 1.91863400  | -3.02051800 | 1.97601700  |
| H | 1.47089500  | -1.37301300 | 2.43700500  |
| C | 3.14536700  | -1.06278000 | 0.31480700  |
| C | 3.45524000  | 0.08544800  | 1.05521300  |
| C | 4.20292000  | -1.70909700 | -0.34918600 |
| C | 4.74926400  | 0.59570800  | 1.12232500  |
| H | 2.65767700  | 0.61467300  | 1.56732700  |
| C | 5.50108100  | -1.21273000 | -0.29866600 |
| H | 4.02427100  | -2.62964400 | -0.89645700 |
| C | 5.78702200  | -0.05338500 | 0.43495900  |
| H | 4.93437400  | 1.49563400  | 1.69594700  |
| H | 6.31243500  | -1.71748600 | -0.81266600 |
| O | 7.08404400  | 0.35642800  | 0.42060400  |
| H | 7.43560300  | 1.52226500  | 1.16395500  |
| H | 7.22800600  | 1.39431700  | 2.23319000  |
| H | 8.50767600  | 1.65843700  | 1.01867600  |
| H | 6.90481100  | 2.40851800  | 0.79551300  |

**H**

|    |             |             |             |
|----|-------------|-------------|-------------|
| N  | 0.23977100  | 0.37160300  | 0.80988600  |
| P  | -2.48576100 | 0.30832900  | -0.90299700 |
| Ir | -0.86408900 | -1.23969300 | -0.33519800 |
| H  | -0.37602300 | -0.57027000 | -1.74098700 |
| C  | 0.63887400  | -2.97293600 | 0.26435900  |
| C  | 1.08409400  | -2.28660500 | -0.92280800 |
| C  | 2.16528400  | 1.40214800  | 1.68074300  |
| H  | 3.06891400  | 1.08116100  | 1.16087500  |
| H  | 2.42616500  | 1.99697600  | 2.55334700  |
| C  | 0.40747500  | 1.54184000  | 0.29787700  |
| O  | 1.42302700  | 2.27031100  | 0.77226500  |
| C  | 1.19264800  | 0.23593200  | 1.95111600  |
| C  | -0.39948300 | 2.15590200  | -0.83154500 |
| N  | -1.82697700 | 1.85047100  | -0.65941200 |
| H  | -2.42142200 | 2.60676300  | -0.97628800 |
| C  | -2.97870200 | 0.14351200  | -2.66221000 |
| H  | -3.38317700 | -0.85652900 | -2.83366100 |
| H  | -3.71637600 | 0.89578000  | -2.94783700 |
| H  | -2.08077300 | 0.26270700  | -3.27130500 |
| C  | -4.07787300 | 0.34037500  | 0.09073300  |
| C  | -4.76771400 | -1.02995500 | -0.04942100 |
| H  | -4.12839400 | -1.84119600 | 0.30966700  |
| H  | -5.68344900 | -1.02920500 | 0.55088800  |
| H  | -5.05271800 | -1.24491800 | -1.08371300 |
| C  | -3.74507400 | 0.62418300  | 1.56550000  |
| H  | -4.67494200 | 0.63616200  | 2.14353400  |
| H  | -3.09814900 | -0.14576700 | 1.99065200  |
| H  | -3.25320900 | 1.59251800  | 1.68592000  |
| C  | -5.00999900 | 1.45227900  | -0.44034300 |
| H  | -5.91807900 | 1.46480400  | 0.17133600  |
| H  | -4.55934500 | 2.44686200  | -0.36141400 |
| H  | -5.31807700 | 1.28179800  | -1.47544100 |
| H  | -0.62681500 | -2.36117400 | 0.88037100  |
| H  | -1.63357800 | -2.31299000 | -1.19330400 |
| C  | -0.18097300 | 3.68512500  | -0.95935600 |
| H  | 0.90448500  | 3.82120200  | -0.99211200 |
| C  | -0.72631100 | 4.47080400  | 0.24345000  |
| H  | -0.47544500 | 5.53037800  | 0.13840500  |
| H  | -1.81613400 | 4.39753400  | 0.31774800  |
| H  | -0.29792900 | 4.11310600  | 1.18301900  |
| C  | -0.75375700 | 4.20828600  | -2.28532000 |
| H  | -0.49576700 | 5.26365900  | -2.41073300 |
| H  | -0.35180700 | 3.65615300  | -3.14115500 |
| H  | -1.84722500 | 4.14105800  | -2.32449500 |
| H  | 0.00073700  | 1.69377800  | -1.74749500 |
| C  | 0.50423400  | 0.27508500  | 3.34821900  |
| C  | -0.29345000 | 1.57824100  | 3.53363200  |
| H  | 0.34739200  | 2.46438100  | 3.47667600  |
| H  | -1.07440800 | 1.67131800  | 2.77351000  |
| H  | -0.77744100 | 1.58673200  | 4.51513200  |
| C  | 1.60342100  | 0.16468700  | 4.42593400  |
| H  | 1.14434100  | 0.12797100  | 5.41868900  |
| H  | 2.19313400  | -0.74985200 | 4.29563600  |
| H  | 2.29143700  | 1.01527700  | 4.41895300  |
| H  | 1.71918200  | -0.71469300 | 1.85381400  |
| C  | -0.43854800 | -0.92961600 | 3.50676300  |
| H  | -1.26911000 | -0.88034600 | 2.80460700  |
| H  | 0.09231800  | -1.87474700 | 3.34233000  |
| H  | -0.85078700 | -0.95243300 | 4.52058600  |
| H  | -1.89779200 | -1.55622700 | 0.88948500  |
| H  | 1.18245200  | -2.71450900 | 1.17167700  |
| C  | 0.14294200  | -4.40686100 | 0.23470000  |
| H  | -0.30609500 | -4.68462900 | 1.19081900  |
| H  | -0.59227900 | -4.57100400 | -0.55279600 |
| H  | 1.00017700  | -5.06452600 | 0.05277100  |
| C  | 0.96566100  | -2.99024600 | -2.26992400 |
| H  | 1.77942900  | -3.72190400 | -2.35443800 |
| H  | 0.01517200  | -3.50863400 | -2.39285200 |
| H  | 1.07314000  | -2.27401400 | -3.08502600 |
| C  | 2.29457000  | -1.39819000 | -0.82398400 |
| C  | 2.44507600  | -0.26892100 | -1.63963200 |
| C  | 3.37642300  | -1.74463800 | 0.00543300  |
| C  | 3.59991300  | 0.51006400  | -1.62249400 |
| H  | 1.62768200  | 0.02034200  | -2.29219000 |
| C  | 4.53864400  | -0.98070700 | 0.03777000  |
| H  | 3.32585900  | -2.63631500 |             |

I

|    |             |             |             |
|----|-------------|-------------|-------------|
| N  | -0.66387900 | 1.19960500  | -0.65025400 |
| P  | -2.19389800 | -1.26829900 | 0.73026900  |
| Ix | -0.58877000 | -1.12484100 | -0.98951800 |
| H  | -1.21673500 | -0.75311600 | -2.48833500 |
| C  | 1.74886900  | -1.78417100 | -0.89070700 |
| C  | 1.24523400  | -1.23129600 | -2.15534300 |
| C  | -0.61882200 | 3.15157600  | -1.94516000 |
| H  | -0.66719600 | 2.84921500  | -2.99547000 |
| H  | -0.42143100 | 4.21913800  | -1.87527200 |
| C  | -1.84317200 | 1.72344300  | -0.73423800 |
| O  | -1.93618500 | 2.90715400  | -1.35783500 |
| C  | 0.29819100  | 2.25327600  | -1.10223000 |
| C  | -3.16018800 | 1.12370700  | -0.27299900 |
| N  | -2.95509500 | 0.25124800  | 0.88787600  |
| H  | -3.77166500 | 0.23391100  | 1.48791900  |
| C  | -3.51189500 | -2.50010800 | 0.37352800  |
| H  | -3.06643100 | -3.49317600 | 0.27883300  |
| H  | -4.28429400 | -2.51575100 | 1.14594400  |
| H  | -3.96624400 | -2.23557600 | -0.58459300 |
| C  | -1.60077900 | -1.63764700 | 2.46874300  |
| C  | -1.00248300 | -3.05773900 | 2.47229800  |
| H  | -0.23212800 | -3.17020800 | 1.70263500  |
| H  | -0.53883300 | -3.25240400 | 3.44510200  |
| H  | -1.76435400 | -3.82591400 | 2.30968300  |
| C  | -0.52051000 | -0.60567300 | 2.83559800  |
| H  | -0.17156800 | -0.79186500 | 3.85715200  |
| H  | 0.34243300  | -0.67485800 | 2.17013600  |
| H  | -0.90935200 | 0.41469000  | 2.78376900  |
| C  | -2.75873500 | -1.54481300 | 3.48248200  |
| H  | -2.37539000 | -1.78446300 | 4.48025100  |
| H  | -3.17682400 | -0.53458100 | 3.53343200  |
| H  | -3.56576200 | -2.25037600 | 3.26621200  |
| H  | 0.72628000  | -1.59720900 | 0.02744600  |
| H  | -0.77573600 | -2.64765100 | -1.30392800 |
| C  | -4.23713600 | 2.20251400  | 0.02868800  |
| H  | -4.28012400 | 2.83045500  | -0.86637900 |
| C  | -3.87615200 | 3.09402600  | 1.22452600  |
| H  | -4.66553800 | 3.83335800  | 1.38948800  |
| H  | -3.76689800 | 2.51266300  | 2.14571200  |
| H  | -2.94270100 | 3.63377100  | 1.05080500  |
| C  | -5.61862400 | 1.55169500  | 0.20257200  |
| H  | -6.38640700 | 2.32721200  | 0.27430100  |
| H  | -5.86804900 | 0.90405200  | -0.64447200 |
| H  | -5.68793600 | 0.95179300  | -1.11752100 |
| H  | -3.53571300 | 0.56234800  | -1.14609000 |
| C  | 0.98401900  | 2.99467000  | 0.08993300  |
| C  | -0.03729400 | 3.74464800  | 0.96532600  |
| H  | -0.60595700 | 4.49573800  | 0.40852400  |
| H  | -0.74377000 | 3.04888500  | 1.42775600  |
| H  | 0.48604500  | 4.26373900  | 1.77417600  |
| C  | 2.00767200  | 3.98935000  | -0.49313500 |
| C  | 2.54415700  | 4.48715600  | 0.32079200  |
| H  | 2.74785200  | 3.47305200  | -1.11477600 |
| H  | 1.53933100  | 4.77089300  | -1.10032000 |
| H  | 1.07295100  | 1.78821900  | -1.71421400 |
| C  | 1.72973900  | 1.98290100  | 0.96814800  |
| H  | 1.05416500  | 1.21272500  | 1.34126200  |
| H  | 2.52965700  | 1.49716100  | 0.41152200  |
| H  | 2.17985100  | 2.48899100  | 1.82837100  |
| H  | -1.97013800 | -0.86715700 | -1.90260900 |
| C  | 2.84813000  | -1.04343900 | -0.17156100 |
| C  | 3.81006000  | -0.33080400 | -0.89466300 |
| C  | 3.01429500  | -1.15555800 | 1.21994200  |
| C  | 4.89109500  | 0.28623700  | -0.25898900 |
| C  | 3.73564700  | -0.25941000 | -1.97446500 |
| C  | 4.07154800  | -0.53849300 | 1.86791900  |
| C  | 2.29677300  | -1.72003800 | 1.80796600  |
| C  | 5.01895900  | 0.19651000  | 1.13277500  |
| H  | 5.61559000  | 0.82654400  | -0.85516500 |
| H  | 4.18733300  | -0.60515800 | 2.94440100  |
| C  | 1.93131300  | -3.30141400 | -0.79215300 |
| H  | 1.58036500  | -0.21144600 | -2.34169100 |
| H  | 2.06584100  | -3.61342500 | 0.24561600  |
| H  | 1.09132400  | -3.84925500 | -1.21712300 |
| O  | 6.01180800  | 0.77000400  | 1.85956700  |
| C  | 6.99217200  | 1.54920400  | 1.17382900  |
| H  | 7.66854700  | 1.92294600  | 1.94281600  |
| H  | 7.55734100  | 0.94113700  | 0.45754000  |
| H  | 6.53311500  | 2.39585600  | 0.64949100  |
| C  | 1.23263700  | -2.07305600 | -3.41900100 |
| H  | 0.72298900  | -3.02867100 | -3.28335700 |
| H  | 0.72106300  | -1.53380600 | -4.22047500 |
| H  | 2.25850200  | -2.28001400 | -3.75261500 |
| H  | 2.84275300  | -3.56153700 | -1.34037800 |

J

|    |             |             |             |
|----|-------------|-------------|-------------|
| N  | 1.90147300  | -0.99802800 | -0.25282500 |
| P  | 0.59590300  | 1.93045200  | -0.02822300 |
| Ix | -0.17808800 | -0.11505600 | -0.93935100 |
| H  | 0.31017400  | -0.38790100 | -2.48915000 |
| C  | -1.89445000 | -1.60094600 | -0.09287700 |
| C  | -1.39351100 | -1.85629600 | -1.45445800 |
| C  | 3.65980600  | -2.48565000 | -0.66341400 |
| C  | 3.47570400  | -2.92079200 | -1.65018000 |
| H  | 4.48943800  | -2.99644800 | -0.18005900 |
| C  | 2.94911000  | -0.36628400 | -0.67248800 |
| O  | 4.05836800  | -1.09320300 | -0.86284400 |
| C  | 2.38248800  | -2.35158500 | 0.17616900  |
| C  | 3.06151100  | 1.12097500  | -0.96342500 |
| H  | 2.30261000  | 1.87052600  | 0.05151300  |
| H  | 2.72638200  | 2.77365700  | 0.23358600  |
| C  | 0.17855600  | 3.32874300  | -1.15033400 |
| H  | -0.90099400 | 3.35791000  | -1.31285700 |
| H  | 0.51779300  | 4.29063400  | -0.75822000 |
| H  | 0.66495800  | 3.14294100  | -2.11117300 |
| C  | 0.08159400  | 2.51088900  | 1.67850800  |
| C  | -1.39002700 | 2.96543300  | 1.59592200  |
| H  | -2.03256000 | 2.20043300  | 1.15007300  |
| H  | -1.76021500 | 3.16194700  | 2.60791700  |
| H  | -1.50247300 | 3.88766500  | 1.01903800  |
| C  | 0.21937100  | 1.34030700  | 2.66424300  |
| H  | -0.04631400 | 1.67973900  | 3.67118000  |
| H  | -0.44879500 | 0.51672000  | 2.40117000  |
| H  | 1.24255400  | 0.95649800  | 2.69319000  |
| C  | 0.97181400  | 3.67909000  | 2.14821900  |
| O  | 0.59677900  | 4.04430900  | 3.11039100  |
| H  | 2.00779300  | 3.36213700  | 2.30206800  |

|   |             |             |             |
|---|-------------|-------------|-------------|
| H | 0.95985400  | 4.52454000  | 1.45388700  |
| H | -1.10076800 | -0.66045300 | 0.44644800  |
| H | -1.43839100 | 0.65187100  | -1.46780800 |
| C | 4.52854000  | 1.62166600  | -1.04403800 |
| H | 5.03105900  | 0.94465900  | -1.74205900 |
| C | 5.26930900  | 1.56258400  | 0.29939400  |
| H | 6.30374500  | 1.89284200  | 0.16572300  |
| H | 4.80822300  | 2.21711200  | 1.04591200  |
| H | 5.28696400  | 0.54873700  | 0.70262100  |
| C | 4.57888100  | 3.03367500  | -1.64931500 |
| H | 5.61853300  | 3.32899300  | -1.81652300 |
| H | 4.05426600  | 3.07933000  | -2.60949500 |
| H | 4.13653200  | 3.78682500  | -0.98678500 |
| H | 2.64264500  | 1.26097000  | -1.97337600 |
| C | 2.62703100  | -2.43410200 | 1.72099300  |
| C | 3.64560400  | -1.37931300 | 2.19362100  |
| H | 4.61877200  | -1.49924300 | 1.70894700  |
| H | 3.28775700  | -0.36299000 | 2.00273100  |
| H | 3.80230200  | -1.47844500 | 3.27204900  |
| C | 3.15185300  | -3.84519100 | 2.05818400  |
| H | 3.20715100  | -3.96584600 | 3.14476800  |
| H | 2.48240300  | -4.62109600 | 1.67006800  |
| H | 4.15466300  | -4.02987900 | 1.66127700  |
| H | 1.64603600  | -3.10492100 | -0.10220000 |
| C | 1.30272400  | -2.22120200 | -2.47247800 |
| H | 0.77408500  | -1.34183000 | 2.10437500  |
| H | 0.64867500  | -3.08940100 | 2.36879900  |
| H | 1.49325200  | -2.08351500 | 3.54151300  |
| C | -1.69284900 | -2.71059500 | 0.93928800  |
| H | -0.71547300 | -3.17815900 | 0.85319300  |
| H | -1.82405400 | -2.34408500 | 1.95894100  |
| H | -2.45778100 | -3.46974200 | 0.74620900  |
| H | 0.63828100  | 0.51852700  | -2.23793400 |
| C | -0.73789900 | -3.16979500 | -1.82968700 |
| H | 0.08775300  | -3.44681800 | -1.17456000 |
| H | -1.47112600 | -3.98700700 | -1.79964900 |
| H | -0.34436900 | -3.10870700 | -2.84733800 |
| C | -3.24281900 | -0.92361100 | 0.05453700  |
| C | -3.51975700 | -0.12505100 | 1.17660900  |
| C | -4.27099300 | -1.14267500 | -0.86421000 |
| C | -4.76244600 | 0.46323700  | 1.35405000  |
| H | -2.74620700 | 0.04853200  | 1.91909600  |
| C | -5.53151500 | -0.56312700 | -0.69901000 |
| C | -4.10819700 | -1.78585400 | -1.72275700 |
| C | -5.78312400 | 0.25248100  | 0.41058800  |
| H | -4.96870400 | 1.09193600  | 2.21385700  |
| H | -6.30295000 | -0.75968600 | -1.43480600 |
| H | -2.06185500 | -1.50632500 | -2.23658900 |
| O | -6.96426800 | 0.87519900  | 0.66877400  |
| C | -8.03858700 | 0.69737500  | -0.25360900 |
| H | -8.87200800 | 1.27904100  | 0.14130500  |
| H | -7.77621300 | 1.06983200  | -1.25122400 |
| H | -8.33373400 | -0.35629700 | -0.32649100 |

K

|    |             |             |             |
|----|-------------|-------------|-------------|
| N  | -1.70100200 | -0.94544100 | 0.35546300  |
| P  | -0.43972600 | 1.88200700  | -0.55219100 |
| Ix | 0.11461600  | -0.37946600 | -0.89806000 |
| H  | 1.02786400  | -0.23242800 | 0.52624800  |
| C  | 1.23991400  | -2.24595600 | -0.59070400 |
| C  | -1.71643900 | -1.47006300 | 0.55443200  |
| C  | -2.93221400 | -2.32298900 | 1.79759200  |
| H  | -2.25246700 | -2.99745300 | 2.32660600  |
| H  | -3.96220900 | -2.60633100 | -2.00355700 |
| C  | -1.95625200 | -0.33413700 | 1.46318000  |
| O  | -2.73040500 | -0.98267100 | 2.34216500  |
| C  | -2.57942600 | -2.15621400 | 0.30935200  |
| C  | -1.43696800 | 1.03038300  | 1.88499000  |
| N  | -1.53275800 | 1.97297900  | 0.75806900  |
| H  | -1.68548000 | 2.91993000  | 1.08741800  |
| C  | 1.04221800  | 2.87179500  | -0.09250100 |
| H  | 1.80825700  | 2.75590800  | -0.86199200 |
| H  | 0.81187100  | 3.93070700  | 0.04437000  |
| H  | 1.43819800  | 2.46935300  | 0.84172400  |
| C  | -1.28976800 | 2.86801300  | -1.90421300 |
| C  | -0.28085100 | 3.05807500  | -3.05369700 |
| H  | 0.11762600  | 2.09936100  | -3.40182300 |
| H  | -0.78740100 | 3.53791000  | -3.89772500 |
| H  | 0.55807000  | 3.69740200  | -2.76421700 |
| C  | -0.56101000 | 2.08704500  | -2.40709100 |
| H  | -3.07489600 | 2.71129100  | -3.11201000 |
| H  | -2.22510100 | 1.17776200  | -2.93916300 |
| H  | -3.18624400 | 1.81381100  | -1.58798200 |
| H  | -1.75273900 | 4.23827000  | -1.36712700 |
| H  | -2.17753400 | 4.81592800  | -2.19495500 |
| H  | -2.53711800 | 4.13377100  | -0.61102100 |
| H  | -0.93367300 | 4.82894100  | -0.94750600 |
| H  | -0.45402300 | -1.16374800 | -2.25181700 |
| H  | 1.36983100  | 0.07175600  | -1.73802600 |
| C  | -2.17010200 | 1.58982700  | 3.13186700  |
| C  | -2.15123000 | 0.78332200  | 3.87149800  |
| C  | -3.63754900 | 1.94966200  | 2.85147000  |
| H  | -4.12567800 | 2.26104000  | 3.77960500  |
| H  | -3.72444500 | 2.77677300  | 2.13975900  |
| H  | -4.18895000 | 1.09699400  | 2.44795900  |
| C  | -1.39789300 | 2.77815900  | 3.72478900  |
| H  | -1.87535800 | 3.10683100  | 4.65215900  |
| H  | -0.36159000 | 2.50852500  | 3.95410600  |
| H  | -1.37958200 | 3.64246600  | 3.05096200  |
| H  | -0.39027100 | 0.85936400  | 2.18435700  |
| C  | -3.81456000 | -1.98833000 | -0.62854200 |
| C  | -4.72118200 | -0.83162000 | -0.16969900 |
| H  | -5.15327800 | -1.01011300 | 0.82003600  |
| H  | -4.17127400 | 0.11409500  | -0.13771700 |
| H  | -5.55152200 | -0.70898500 | -0.87183200 |
| C  | -4.59992100 | -3.31591800 | -0.61440400 |
| H  | -5.45464500 | -3.24701900 | -1.29424800 |
| H  | -3.9721     |             |             |

|   |             |             |             |
|---|-------------|-------------|-------------|
| H | 2.69258700  | 0.76476500  | 1.81453200  |
| C | 5.45583800  | -1.09213900 | -0.16430900 |
| H | 3.93083600  | -2.48503400 | -0.71713400 |
| C | 5.76627900  | 0.07138800  | 0.54937500  |
| H | 5.00513000  | 1.63101000  | 1.81740400  |
| H | 6.21741200  | -1.63443200 | -0.71061100 |
| C | 0.54469600  | -3.57847300 | -0.40038400 |
| H | 1.29247200  | -4.35895500 | -0.20967300 |
| H | -0.14878300 | -3.58956700 | 0.43985400  |
| H | -0.00631900 | -3.85736900 | -1.30179300 |
| C | 1.25880700  | -1.89255900 | 1.95100100  |
| H | 0.18962300  | -2.09570000 | 1.98626000  |
| H | 1.79867500  | -2.80579100 | 2.22070000  |
| H | 1.49236500  | -1.12965600 | 2.69590000  |
| O | 7.00042000  | 0.63463400  | 0.62112800  |
| C | 8.07170200  | 0.01442500  | -0.08993200 |
| H | 7.87259500  | -0.01391500 | -1.16786800 |
| H | 8.95192900  | 0.62932100  | 0.09932100  |
| H | 8.25550600  | -1.00409700 | 0.27227300  |

## L

|                |             |             |             |
|----------------|-------------|-------------|-------------|
| N              | 0.21179800  | 0.37323000  | 0.92488700  |
| P              | -2.38850300 | 0.26877900  | -0.99649000 |
| I <sub>r</sub> | -1.00834800 | -1.32126700 | 0.05296600  |
| H              | 0.02683500  | -1.30954200 | -1.31684300 |
| C              | 0.58521500  | -2.77134300 | 0.35670200  |
| C              | 0.97344400  | -2.24061500 | -0.95631100 |
| C              | 2.23456300  | 1.31189900  | 1.66547500  |
| H              | 3.08685000  | 0.81857500  | 1.19533400  |
| H              | 2.57770100  | 1.99111100  | 2.44306800  |
| C              | 0.49567700  | 1.43931800  | 0.25450600  |
| O              | 1.58039900  | 2.11968500  | 0.64029400  |
| C              | 1.13260200  | 0.32726900  | 2.09862500  |
| C              | -0.23688500 | 1.99144000  | -0.95672800 |
| N              | -1.68785800 | 1.81362100  | -0.81223700 |
| H              | -2.19365900 | 2.54652500  | -1.29719900 |
| C              | -2.57563000 | -0.03570500 | -2.80201400 |
| H              | -3.04383500 | -1.00948700 | -2.96338500 |
| H              | -3.16209400 | 0.74308400  | -3.29460200 |
| H              | -1.57585300 | -0.06226700 | -3.24254900 |
| C              | -4.12505800 | 0.51262800  | -0.32545500 |
| C              | -4.87831700 | -0.82488100 | -0.46429800 |
| H              | -4.35964200 | -1.63490300 | 0.05750000  |
| H              | -5.87588700 | -0.72245600 | -0.02398300 |
| H              | -5.00835900 | -1.11798900 | -1.51047200 |
| H              | -4.03264800 | 0.91471000  | 1.15888600  |
| H              | -5.04208500 | 1.09605900  | 1.54296600  |
| H              | -3.58968200 | 0.12391500  | 1.77087800  |
| H              | -3.44261300 | 1.82457800  | 1.29587700  |
| C              | -4.86902000 | 1.61845500  | -1.10258700 |
| H              | -5.87739000 | 1.72326800  | -0.68825600 |
| H              | -4.38154900 | 2.59384200  | -1.00480500 |
| H              | -4.97728500 | 1.38507500  | -2.16495500 |
| H              | -1.51122100 | -1.90317700 | 1.52342900  |
| H              | -1.83757100 | -2.48263100 | -0.62123300 |
| C              | 0.11061700  | 3.47941600  | -1.22812100 |
| H              | 1.20375600  | 3.52612800  | -1.24381400 |
| C              | -0.39758000 | 4.41976100  | -0.12506000 |
| H              | -0.07555300 | 5.44449000  | -0.33254100 |
| H              | -1.49068100 | 4.42139100  | -0.06595500 |
| H              | -0.00598500 | 4.13379400  | 0.85433300  |
| C              | -0.38906200 | 3.90960600  | -2.61574200 |
| H              | -0.02892200 | 4.91683700  | -2.84336900 |
| H              | -0.02892300 | 3.23477700  | -3.39925700 |
| H              | -1.48310300 | 3.94271300  | -2.67639400 |
| H              | 0.15849900  | 1.42211400  | -1.81169000 |
| C              | 0.43062300  | 0.70047500  | 3.43981400  |
| C              | -0.11249300 | 2.14150300  | 3.40710700  |
| H              | 0.68263500  | 2.88370500  | 3.28511200  |
| H              | -0.83346600 | 2.27264900  | 2.59398900  |
| H              | -0.62716100 | 2.36568300  | 4.34649500  |
| C              | 1.46818200  | 0.54826500  | 4.57085500  |
| H              | 1.00789800  | 0.79024700  | 5.53372100  |
| H              | 1.84175600  | -0.48041100 | 4.62560200  |
| H              | 2.32755900  | 1.21408400  | 4.44459400  |
| H              | 1.53481000  | -0.68347500 | 2.19075200  |
| C              | -0.73693300 | -0.26249500 | 3.71652300  |
| H              | -1.56470700 | -0.08147100 | 3.02949200  |
| H              | -0.42646300 | -1.30909400 | 3.62133500  |
| H              | -1.11210700 | -0.11257700 | 4.73418900  |
| C              | 0.20018700  | -4.22775700 | 0.53294300  |
| H              | -0.56780400 | -4.54974500 | -0.17239300 |
| H              | 1.07705600  | -4.87586200 | 0.39997700  |
| H              | -0.18742400 | -4.38890100 | 1.54214800  |
| C              | 0.80566500  | -3.14882400 | -2.17755200 |
| H              | 1.58268800  | -3.91896100 | -2.13549500 |
| H              | -0.17255500 | -3.62974100 | -2.18842500 |
| H              | 0.93389200  | -2.58592000 | -3.10449000 |
| H              | 1.20503300  | -2.40981400 | 1.17369000  |
| C              | 2.20413000  | -1.36571800 | -1.02407300 |
| C              | 2.30673100  | -0.33149000 | -1.97084400 |
| C              | 3.31186800  | -1.62162100 | -0.21143500 |
| C              | 3.44654600  | 0.45033000  | -2.06558500 |
| H              | 1.47535800  | -0.13259200 | -2.64168200 |
| C              | 4.48072400  | -0.85934900 | -0.30830600 |
| H              | 3.28508900  | -2.43737100 | 0.50320500  |
| C              | 4.54793800  | 0.19495100  | -1.22849700 |
| H              | 3.51399000  | 1.26232100  | -2.78165500 |
| H              | 5.31908400  | -1.09688100 | 0.33447700  |
| O              | 5.61672400  | 1.01413700  | -1.39477000 |
| C              | 6.76106100  | 0.81439900  | -0.56387200 |
| H              | 7.48065100  | 1.57876000  | -0.85748600 |
| H              | 6.51024200  | 0.93821200  | 0.49647600  |
| H              | 7.20035600  | -0.17773000 | -0.72040500 |
| H              | -2.17614100 | -1.26132200 | 1.23120900  |

## M

|                |             |             |             |
|----------------|-------------|-------------|-------------|
| N              | -1.47979300 | 1.12130200  | -0.47516700 |
| P              | -1.13919600 | -2.02110000 | 0.24721300  |
| I <sub>r</sub> | 0.40166900  | -0.26365600 | 0.07456200  |
| H              | 0.83585900  | 0.14139200  | -1.51735400 |
| C              | 1.66927500  | 0.54008300  | 1.90083200  |
| C              | 2.06490300  | 1.14798300  | 0.64352000  |
| C              | -2.30405800 | 2.87048100  | -1.81634300 |
| H              | -1.55975000 | 3.11227700  | -2.58068700 |
| H              | -3.10274400 | 3.60918300  | -1.83326700 |
| C              | -2.27712100 | 0.67299900  | -1.38857200 |
| O              | -2.88935800 | 1.58174600  | -2.16310500 |

|   |             |             |             |
|---|-------------|-------------|-------------|
| C | -1.68134300 | 2.60525200  | -0.43712600 |
| C | -2.58789300 | -0.77358800 | -1.73445500 |
| N | -2.60049900 | -1.59659700 | -0.51908600 |
| H | -3.25038800 | -2.37012600 | -0.60346700 |
| C | -0.54611800 | -3.56922900 | -0.54680700 |
| H | 0.38931300  | -3.88628500 | -0.08053700 |
| H | -1.28423400 | -4.37162800 | -0.47800400 |
| H | -0.34769300 | -3.35209200 | -1.59939600 |
| C | -1.67988000 | -2.50790600 | 1.97683500  |
| C | -0.45767700 | -3.08369700 | 2.71882100  |
| H | 0.38520600  | -2.38502600 | 2.71475700  |
| H | -0.72860700 | -3.27517600 | 3.76254200  |
| H | -0.12119400 | -4.03058600 | 2.28651700  |
| C | -2.19109900 | -1.24977700 | 2.70179100  |
| H | -2.58281000 | -1.53268700 | 3.68470300  |
| H | -1.38912100 | -0.52437000 | 2.86169600  |
| H | -2.99083600 | -0.75907600 | 2.14040100  |
| C | -2.80816800 | -3.55848900 | 1.92281200  |
| H | -3.07399500 | -3.84518000 | 2.94586000  |
| H | -3.71417500 | -3.16122300 | 1.45466800  |
| H | -2.50937900 | -4.47015100 | 1.39745800  |
| H | 0.44760300  | -0.14406600 | 1.75426400  |
| H | 1.54337300  | -1.32916500 | 0.15754000  |
| C | -3.92363400 | -0.93183600 | -2.51201100 |
| H | -3.85814400 | -0.23827500 | -3.35549600 |
| C | -5.15261200 | -0.55576600 | -1.67186500 |
| H | -6.05944500 | -0.64989700 | -2.27651200 |
| H | -5.26337900 | -1.21254500 | -0.80324000 |
| H | -5.09095800 | 0.47386400  | -1.31268800 |
| C | -4.04900900 | -2.35071400 | -3.08976100 |
| H | -4.92186600 | -2.40666500 | -3.74633000 |
| H | -3.16565500 | -2.62745400 | -3.67469600 |
| H | -4.18951800 | -3.10987900 | -2.31133000 |
| H | -1.79183000 | -1.08200000 | -2.43317800 |
| C | -2.57546200 | 3.04857000  | 0.76389100  |
| C | -3.96522700 | 2.38680500  | 0.71024200  |
| H | -4.51080500 | 2.64089000  | -0.20394200 |
| C | -3.88886000 | 1.29731800  | 0.77403400  |
| H | -4.56922800 | 2.72708300  | 1.55690900  |
| C | -2.72530700 | 4.58276100  | 0.72324700  |
| H | -3.26697100 | 4.92509900  | 1.61068400  |
| H | -1.74715100 | 5.07698700  | 0.71673200  |
| H | -3.28531200 | 4.92743500  | -0.15144100 |
| H | -0.71247800 | 3.09452000  | -0.35566500 |
| C | -1.88813600 | 2.66269900  | 2.08222400  |
| H | -1.64273200 | 1.59943600  | 2.10629200  |
| H | -0.96947000 | 3.24074800  | 2.21967500  |
| H | -2.54135100 | 2.88380200  | 2.93222900  |
| H | 0.31788000  | -0.60916200 | -1.59335700 |
| C | 1.79330900  | 2.63274000  | 0.44747300  |
| H | 0.83896200  | 2.93725300  | 0.87389800  |
| 2 | 2.58166500  | 3.22168500  | 0.93431500  |
| H | 1.79368300  | 2.89482700  | -0.61272600 |
| H | 2.25981800  | -0.32980800 | 2.18716900  |
| C | 3.37306800  | 0.70797600  | 0.03774900  |
| C | 3.60152900  | 0.82391000  | -1.34675900 |
| C | 4.43722000  | 0.25301500  | 0.82455300  |
| C | 4.81561100  | 0.47745900  | -1.91675400 |
| H | 2.80091700  | -1.17580600 | -1.99172700 |
| C | 5.66959600  | -0.11032300 | 0.26836600  |
| H | 4.33087900  | 0.19283800  | 1.90344300  |
| C | 5.86438000  | -0.00193600 | -1.11167400 |
| H | 4.97767400  | 0.55907800  | -2.98672800 |
| H | 6.46118500  | -0.45749300 | 0.92102900  |
| O | 7.01409400  | -0.32302200 | -1.76752500 |
| C | 8.10908500  | -0.82199600 | -1.00250200 |
| H | 8.91022300  | -1.01780500 | -1.71599300 |
| H | 8.45225900  | -0.08586500 | -0.26526400 |
| H | 7.84679400  | -1.75375400 | -0.48653100 |
| C | 1.26531900  | 1.35172300  | 3.12739100  |
| H | 0.59365700  | 2.17178500  | 2.89295200  |
| H | 0.79876200  | 0.72161800  | 3.88855400  |
| H | 2.18465200  | 1.77278200  | 3.55044900  |

## N

|                |             |             |             |
|----------------|-------------|-------------|-------------|
| N              | 0.15572100  | 0.94908500  | 0.04236800  |
| P              | -2.74840000 | -0.40873500 | -0.31952100 |
| I <sub>r</sub> | -0.54751700 | -1.17939900 | -0.62593100 |
| H              | 0.07296100  | -0.87859500 | -2.15133500 |
| C              | 6.62661900  | -2.57153100 | 0.86948200  |
| C              | 1.32886900  | -2.34846700 | -0.40100400 |
| C              | 1.68085400  | 2.71646500  | -0.16854600 |
| H              | 2.29358200  | 2.52689800  | -1.05486800 |
| H              | 2.07944600  | 3.56374800  | 0.38537400  |
| C              | -0.39826600 | 1.96919000  | -0.52537200 |
| O              | 0.34191700  | 3.08218100  | -0.62447000 |
| C              | 1.43222000  | 1.44653400  | 0.65395200  |
| C              | -1.79671300 | 2.05457800  | -1.11625800 |
| N              | -2.74227900 | 1.29582200  | -0.28352000 |
| H              | -3.66997400 | 1.70374500  | -0.31157800 |
| C              | -3.86048000 | -0.91115100 | -1.69577500 |
| H              | -3.90061900 | -2.00084700 | -1.75913200 |
| H              | -4.87015200 | -0.51153600 | -1.57581400 |
| H              | -3.43438000 | -0.52965100 | -2.62703500 |
| C              | -3.64055900 | -0.89305300 | 1.25654500  |
| C              | -3.82458000 | -2.42355800 | 1.24055500  |
| H              | -2.86929100 | -2.94137000 | 1.10432900  |
| H              | -4.24719000 | -2.74362800 | 2.19876200  |
| H              | -4.50958200 | -2.74947800 | 0.45256000  |
| C              | -2.77545700 | -0.48621900 | 2.46169500  |
| H              | -3.31895700 | -0.70626800 | 3.38676200  |
| H              | -1.83920800 | -1.04896900 | 2.48900800  |
| H              | -2.53740800 | 0.58072200  | 2.44874700  |
| C              | -5.01039100 | -0.19114800 | 1.35057400  |
| H              | -5.51734400 | -0.52548400 | 2.26208200  |
| H              | -4.90798800 | 0.89655800  | 1.41909100  |
| H              | -5.66428900 | -0.43194600 | 0.50792100  |
| H              | -0.50232600 | -1.85224600 | 0.94412700  |
| H              | -1.14367200 | -2.52131700 | -1.17892600 |
| C              | -2.28257100 | 3.51825500  | -1.29633300 |
| H              | -1.48771800 | 4.02579600  | -1.85118300 |
| C              | -2.48382800 | 4.25420200  | 0.03690700  |
|                |             |             |             |

|   |             |             |             |
|---|-------------|-------------|-------------|
| C | 1.31094900  | 1.68735300  | 2.19089200  |
| C | 0.21624000  | 2.71580700  | 2.52717600  |
| H | 0.41919400  | 3.69450700  | 2.08092500  |
| H | -0.76588300 | 2.37838200  | 2.18210300  |
| C | 0.15690900  | 2.85625100  | 3.61091300  |
| C | 2.67802500  | 2.18512100  | 2.70442400  |
| C | 2.65538600  | 2.27025000  | 3.79550400  |
| H | 3.47715800  | 1.48587900  | 2.43526100  |
| H | 2.94089400  | 3.17055200  | 2.30783400  |
| H | 2.21702500  | 0.71733300  | 0.48295400  |
| C | 0.98771500  | 0.35872900  | 2.89245600  |
| H | 0.05593900  | -0.06449600 | 2.51562000  |
| H | 1.79540600  | -0.36396400 | 2.74178600  |
| H | 0.87749400  | 0.51365600  | 3.97044800  |
| H | -0.80167400 | -0.50680000 | -2.14530200 |
| C | 0.08627500  | -3.94255400 | 1.24612500  |
| H | -0.51033200 | -3.88914600 | 2.16000200  |
| H | -0.52805500 | -4.37149300 | 0.45430900  |
| H | 0.93523100  | -4.61013000 | 1.42692800  |
| C | 1.44187800  | -3.51614000 | -1.38000400 |
| C | 2.21263700  | -4.21544400 | -1.02929500 |
| H | 0.50641100  | -4.06408100 | -1.49862000 |
| H | 1.74794200  | -3.15432600 | -2.36390800 |
| H | 1.07032400  | -2.04892200 | 1.71408800  |
| C | 2.58789200  | -1.52562400 | -0.35888200 |
| C | 2.96661900  | -0.72882700 | -1.44818600 |
| C | 3.45885100  | -1.56133300 | 0.74521700  |
| C | 4.12084000  | 0.05339200  | -1.43040400 |
| C | 2.31952000  | -0.68066800 | -2.31906900 |
| C | 4.61090800  | -0.78224900 | 0.78733000  |
| C | 3.23960400  | -2.20584400 | 1.59100100  |
| C | 4.94510800  | 0.04574600  | -0.29422900 |
| H | 4.35590600  | 0.67032600  | -2.28892000 |
| H | 5.26858800  | -0.80261700 | 1.65003700  |
| O | 6.07397200  | 0.79036200  | -0.14873500 |
| C | 6.44482700  | 1.67038000  | -1.20859000 |
| H | 5.66644200  | 2.42037500  | -1.39600400 |
| H | 7.35566600  | 2.17047400  | -0.87838200 |
| H | 6.64869600  | 1.12069400  | -2.13525000 |

## O

|    |             |             |             |
|----|-------------|-------------|-------------|
| N  | -0.14430700 | 0.86072700  | 0.22980000  |
| P  | 2.71838200  | -0.50671900 | -0.32726600 |
| Tr | 0.51226900  | -1.28655600 | -0.19177500 |
| H  | 0.80714700  | -1.40290500 | 1.45438500  |
| C  | -1.28842800 | -2.27445100 | 0.73714600  |
| C  | -0.41805400 | -1.96218600 | 1.86249100  |
| C  | -1.53946400 | 2.48341800  | 1.17981000  |
| H  | -2.10340700 | 2.02014100  | 1.99427700  |
| H  | -1.91747600 | 3.48544000  | 0.98789600  |
| C  | 0.50794000  | 1.58558200  | 1.07588100  |
| O  | -0.15232600 | 2.61419200  | 1.62276000  |
| C  | -1.43329200 | 1.56801400  | -0.04788800 |
| C  | 1.94007900  | 1.37476600  | 1.53838100  |
| N  | 2.79358200  | 1.04300300  | 0.38533400  |
| C  | 3.74301900  | 1.37036600  | 0.52876000  |
| C  | 3.84792900  | -1.59497700 | 0.63611400  |
| H  | 3.80582500  | -2.60942100 | 0.23498400  |
| H  | 4.88011800  | -1.23648400 | 0.62968700  |
| H  | 3.48173000  | -1.61962200 | 1.66554100  |
| C  | 3.54249700  | -0.26919500 | -1.99549500 |
| C  | 3.70576500  | -1.65777000 | -2.64403300 |
| H  | 2.74959100  | -2.18774800 | 2.70648500  |
| H  | 4.08878900  | -1.53414400 | -3.66249200 |
| H  | 4.41519600  | -2.28702100 | -2.09878000 |
| C  | 2.64626100  | 0.61946700  | -2.87524700 |
| H  | 3.17123900  | 0.84646500  | -3.80923400 |
| H  | 1.71343000  | 0.11629800  | -3.14165700 |
| C  | 2.40377700  | 1.56388200  | -2.38060000 |
| C  | 4.91845800  | 0.40813600  | -1.83235300 |
| H  | 5.39557900  | 0.47976300  | -2.81548900 |
| H  | 4.82519200  | 1.42739100  | -1.44492100 |
| H  | 5.59422300  | -0.15665100 | -1.18425700 |
| H  | -0.33724500 | -1.48204500 | -1.64616900 |
| C  | 1.05505800  | -2.75013000 | -0.40309600 |
| C  | 2.51176100  | 2.59500900  | 2.30620800  |
| H  | 1.76688000  | 2.83765900  | 3.07048200  |
| C  | 2.70355000  | 3.82997100  | 1.41234600  |
| H  | 3.03851400  | 4.67699900  | 2.01829900  |
| H  | 3.45964600  | 3.65832700  | 0.63926100  |
| H  | 1.77212000  | 4.11449700  | 0.91732600  |
| C  | 3.81315900  | 2.21620300  | 3.03015600  |
| H  | 4.14940300  | 3.05069200  | 3.65189400  |
| H  | 3.67444100  | 1.34415400  | 3.67763200  |
| H  | 4.62762100  | 1.99041700  | 2.33205600  |
| H  | 1.89306600  | 0.54274800  | 2.25978400  |
| C  | -1.44087400 | 2.30758700  | -1.41869500 |
| C  | -0.35671600 | 3.39844700  | -1.48505000 |
| H  | -0.51206900 | 4.18307400  | -0.73767000 |
| H  | 0.64072700  | 2.97430800  | -1.33198600 |
| H  | -0.36627900 | 3.87689400  | -2.46945500 |
| C  | -2.83892200 | 2.93291200  | -1.60345800 |
| H  | -2.90271400 | 3.42262700  | -2.58025000 |
| H  | -3.61853400 | 2.16484800  | -1.55703800 |
| H  | -3.06415100 | 3.68864200  | -0.84445500 |
| H  | -2.23731500 | 0.84113000  | -0.05206900 |
| C  | -1.20758700 | 1.29302600  | -2.55087600 |
| H  | -0.19866200 | 0.88508600  | -2.50235700 |
| H  | -1.92156900 | 0.46505800  | -2.49421800 |
| H  | -1.32691800 | 1.78044000  | -3.52382400 |
| H  | 0.47873200  | -1.12992700 | -1.87627900 |
| H  | -0.70517900 | -1.07100500 | 2.42098100  |
| C  | 0.19118600  | -3.05012700 | 2.73248200  |
| H  | 0.68813200  | -3.81586600 | 2.13679600  |
| H  | 0.91562800  | -2.63173600 | 3.43553000  |
| H  | -0.61376700 | -3.52422700 | 3.30443300  |
| C  | -1.44144500 | -3.73887900 | 0.33126500  |
| H  | -0.49521900 | -4.27994700 | 0.34636300  |
| H  | -2.13907000 | -4.23761000 | 1.01715600  |
| H  | -1.85455400 | -3.82058600 | -0.67558500 |
| C  | -2.56412900 | -1.49340400 | 0.58915800  |
| C  | -3.19496400 | -1.39787700 | -0.66040100 |
| C  | -3.19903300 | -0.86582800 | 1.67604500  |
| H  | -4.36981700 | -0.67222100 | -0.84846400 |
| H  | -2.73613000 | -1.86578000 | -1.52477800 |
| C  | -4.36471100 | -0.12422200 | 1.50734900  |
| H  | -2.78802100 | -0.95443900 | 2.67646000  |
| C  | -4.95504800 | -0.00786700 | 0.24089600  |
| H  | -4.80186600 | -0.61218100 | -1.83959100 |
| H  | -4.83980500 | 0.36804500  | 2.34954100  |

## P

|    |             |             |             |
|----|-------------|-------------|-------------|
| N  | -1.34466400 | 1.23241600  | -0.03542900 |
| P  | -1.22409200 | -1.98470900 | 0.10510000  |
| Tr | 0.37222000  | -0.27631400 | -0.06391200 |
| H  | 0.19971700  | -0.52837100 | -1.70816300 |
| C  | 1.90400500  | 1.02911600  | -1.08100700 |
| C  | 1.21589300  | 0.36602400  | -2.17666100 |
| C  | -2.39857500 | 3.26773600  | -0.51937000 |
| H  | -1.89377500 | 3.73726300  | -1.36867600 |
| H  | -3.12128300 | 3.96035100  | -0.09374700 |
| C  | -2.39877000 | 1.04094200  | -0.75552600 |
| O  | -3.14240400 | 2.11921400  | -1.03241400 |
| C  | -1.42237700 | 2.63837000  | 0.48606300  |
| C  | -2.86752800 | -0.28511100 | -1.33038800 |
| N  | -2.74943700 | -1.33365100 | -0.30213000 |
| H  | -3.46936800 | -2.03878500 | -0.41348000 |
| C  | -0.87097900 | -3.32512700 | -1.10654500 |
| H  | 0.13354400  | -3.71715000 | -0.93311500 |
| H  | -1.59854000 | -4.13845800 | -1.05370000 |
| H  | -0.89837500 | -2.88460700 | -2.10642800 |
| C  | -1.53644800 | -2.85839100 | 1.73537200  |
| C  | -0.28934200 | -3.70312500 | 2.06334000  |
| H  | 0.62166100  | -3.09522900 | 2.06195800  |
| H  | -0.40351100 | -4.13482900 | 3.06330200  |
| H  | -0.15502000 | -4.52985500 | 1.36001100  |
| C  | -1.76198900 | -1.80833900 | 2.83602000  |
| H  | -2.05398000 | -2.31365700 | 3.76267100  |
| H  | -0.85001200 | -1.24430800 | 3.04726100  |
| C  | -2.55439600 | -1.10452700 | 2.56753000  |
| C  | -2.78320700 | -3.76217400 | 1.63740300  |
| H  | -2.89419900 | -4.31273000 | 2.57758600  |
| H  | -3.69736700 | -3.17699900 | 1.49679500  |
| H  | -2.71021000 | -4.50248200 | 0.83586000  |
| H  | 0.99510800  | 0.38180100  | 1.36596800  |
| H  | 1.50940300  | -1.36433900 | -0.08131200 |
| C  | -4.31294300 | -0.22353900 | -1.88862500 |
| H  | -4.33623800 | 0.64938100  | -2.54884400 |
| C  | -5.37167600 | -0.02577100 | -0.79253000 |
| H  | -6.35932000 | 0.08839500  | -1.24872800 |
| H  | -5.41895000 | -0.88452100 | -0.11551900 |
| H  | -5.16805400 | 0.86578800  | -0.19512900 |
| C  | -4.61439000 | -1.46249600 | -2.74636000 |
| H  | -5.59251200 | -1.35512700 | -3.22374000 |
| H  | -3.86563400 | -1.59874600 | -3.53375500 |
| H  | -4.64919600 | -2.38262000 | -2.15153700 |
| H  | -2.20570100 | -0.48022200 | -2.18988800 |
| C  | -1.88871900 | 2.71719000  | 1.97205800  |
| C  | -3.29403900 | 2.11685400  | 2.16091400  |
| H  | -4.05834600 | 2.66784500  | 1.60370800  |
| H  | -3.32449600 | 1.07101600  | 1.84000700  |
| H  | -3.57339000 | 2.14814000  | 3.21847900  |
| C  | -1.88921500 | 4.20474800  | 2.38118000  |
| H  | -2.18231400 | 4.29957900  | 3.43126400  |
| H  | -0.89232000 | 4.64581200  | 2.26969300  |
| H  | -2.59191100 | 4.80291000  | 1.79307500  |
| H  | -0.43726800 | 3.09235000  | 0.42255400  |
| H  | -0.89344700 | 1.96853500  | 2.87353800  |
| H  | -0.95291000 | 0.89381800  | 2.71029700  |
| H  | 0.13675800  | 2.29397500  | 2.68880500  |
| H  | -1.12361000 | 2.15852500  | 3.92662300  |
| H  | 0.46802400  | -0.32706100 | 1.62214000  |
| C  | 0.35886900  | 1.12843000  | -3.17164000 |
| H  | -0.37430200 | 1.76525000  | -2.67679300 |
| H  | 1.01134100  | 1.76692700  | -3.77667700 |
| H  | -0.16974500 | 0.44485400  | -3.84020300 |
| H  | 1.75988600  | -0.46619100 | -2.62044500 |
| C  | 1.73845300  | 2.53668100  | -0.93460500 |
| H  | 2.44571800  | 3.04395000  | -1.60351300 |
| H  | 0.73829300  | 2.87963100  | -1.19383000 |
| H  | 1.96328400  | 2.85740300  | 0.08491100  |
| C  | 3.30712100  | 0.58007400  | -0.75781200 |
| C  | 3.81804900  | 0.68670300  | 0.54221000  |
| C  | 4.18509700  | 0.13177500  | -1.75944300 |
| C  | 5.13168500  | 0.34096900  | 0.85484100  |
| H  | 3.16633400  | 1.02941700  | 1.34103100  |
| C  | 5.49730400  | -0.22727300 | -1.46743200 |
| H  | 3.85317200  | 0.07915500  | -2.79216900 |
| C  | 5.98271900  | -0.12951600 | -0.15653700 |
| H  | 5.47415200  | 0.43044900  | 1.87852500  |
| H  | 6.16833400  | -0.57427100 | -2.24655700 |
| O  | 7.27883800  | -0.50639100 | 0.03000200  |
| H  | 7.82714700  | -0.41416100 | 1.34292700  |
| H  | 7.28693000  | -1.05528400 | 2.05039800  |
| H  | 8.85922400  | -0.75715500 | 1.26234700  |
| H  | 7.81685600  | 0.61889500  | 1.71179900  |



## Ir/4c with S3

## TSs for the $\sigma$ -methathesis pathway

### A

|    |             |             |             |
|----|-------------|-------------|-------------|
| N  | -1.06726100 | 1.18431300  | -0.45375100 |
| P  | -0.97973200 | -1.94058700 | 0.38378100  |
| Ir | 0.63591200  | -0.28828400 | 0.25663800  |
| H  | 1.61228200  | 0.11825300  | -1.04494400 |
| C  | 2.26100300  | 1.07724500  | 1.11152500  |
| C  | 2.57403600  | 1.01080900  | -0.30674400 |
| C  | -1.93697800 | 2.99290700  | -1.66936900 |
| H  | -1.18031600 | 3.30673700  | -2.39436100 |
| H  | -2.75729200 | 3.70698800  | -1.65897400 |
| C  | -1.84683800 | 0.77515500  | -1.40007500 |
| O  | -2.47521400 | 1.71395000  | -2.11934200 |
| C  | -1.34285700 | 2.65075900  | -0.29426200 |
| C  | -2.14104000 | -0.66636900 | -1.78326400 |
| N  | -2.31040600 | -1.46966500 | -0.56012900 |
| H  | -2.99445500 | -2.20702900 | -0.68529700 |
| C  | -0.31497200 | -3.50430500 | -0.31603000 |
| H  | 0.57350300  | -3.80885400 | 0.24121700  |
| H  | -1.05707100 | -4.30542600 | -0.29633200 |
| H  | -0.02364600 | -3.30522500 | -1.34941900 |
| C  | -1.71153200 | -2.39196900 | 2.04725100  |
| C  | -0.57567500 | -2.94828300 | 2.92896300  |
| H  | 0.24325400  | -2.22947500 | 3.02789400  |
| H  | -0.97220900 | -3.15027100 | 3.92938100  |
| H  | -0.17110400 | -3.88736300 | 2.54018900  |
| C  | -2.32465800 | -1.14413900 | 2.70263700  |
| H  | -2.78946700 | -1.43524100 | 3.65061800  |
| H  | -1.56573100 | -0.39139100 | 2.91970900  |
| H  | -3.09387100 | -0.69271400 | 2.07111000  |
| C  | -2.81515400 | -3.45668200 | 1.86339700  |
| C  | -3.19821300 | -3.73161500 | 2.85152700  |
| H  | -3.66274500 | -3.07262500 | 1.28722100  |
| H  | -2.45138000 | -4.37259900 | 1.39100600  |
| H  | 0.26018800  | -0.11728000 | 1.82629500  |
| H  | 1.65403300  | -1.40404000 | 0.65405900  |
| C  | -3.37745200 | -0.81283000 | -2.70812400 |
| C  | -3.21702100 | -0.10283500 | -3.52540800 |
| C  | -4.70218500 | -0.45619700 | -2.01661300 |
| H  | -5.52041700 | -0.50481000 | -2.74109400 |
| H  | -4.94039900 | -1.15394400 | -1.20725300 |
| H  | -4.67853300 | 0.55210400  | -1.59844200 |
| C  | -3.42566000 | -2.22220800 | -3.31879800 |
| H  | -4.24085700 | -2.28507700 | -4.04511400 |
| H  | -2.49163800 | -2.47003500 | -3.83360300 |
| H  | -3.60927300 | -2.99619100 | -2.56440700 |
| H  | -1.27007400 | -0.99929100 | -2.36833300 |
| C  | -2.29280300 | 2.95899000  | 0.90912800  |
| C  | -3.63794300 | 2.22311000  | 0.76302000  |
| H  | -4.17549700 | 2.52207800  | -0.14233900 |
| H  | -3.49977900 | 1.13875500  | 0.73712300  |
| H  | -4.28059500 | 2.45644600  | 1.61728000  |
| C  | -2.53800800 | 4.48146200  | 0.95834500  |
| H  | -3.10714200 | 4.73183800  | 1.85907800  |
| H  | -1.59208500 | 5.03342100  | 0.99648600  |
| H  | -3.11142700 | 4.84688100  | 0.10099900  |
| H  | -0.40737700 | 3.18799100  | -0.13890700 |
| C  | -1.62039600 | 2.53948900  | 2.22815700  |
| H  | -1.24526700 | 1.51798700  | 2.17640500  |
| H  | -0.78356900 | 3.19941400  | 2.46972700  |
| H  | -2.33857000 | 2.60424800  | 3.05177400  |
| C  | 3.13541000  | 0.31072700  | 2.09489400  |
| C  | 3.48135000  | -0.64437000 | 1.70226200  |
| H  | 4.01819300  | 0.91973300  | 2.33011900  |
| C  | 2.58799000  | 0.13143600  | 3.02173600  |
| C  | 1.78553400  | 2.39029700  | 1.69633400  |
| H  | 1.05316000  | 2.90592600  | 1.08318200  |
| H  | 1.35517900  | 2.23371500  | 2.68558600  |
| C  | 2.65510500  | 3.05280700  | 1.80486300  |
| H  | 0.59704500  | -0.86649700 | -1.29322400 |
| C  | 3.83872900  | 0.26540200  | -0.70578800 |
| C  | 3.87459300  | -1.01694500 | -1.26125800 |
| C  | 5.04651700  | 0.95557200  | -0.51161100 |
| C  | 5.09434900  | -1.60176600 | -1.61302800 |
| C  | 2.95323300  | -1.56845600 | -1.40886100 |
| C  | 6.26249100  | 0.37093100  | -0.86228100 |
| H  | 5.03532600  | 1.95133500  | -0.07763300 |
| C  | 6.29067800  | -0.91225800 | -1.41508900 |
| H  | 5.10390700  | -2.59981000 | -2.04091600 |
| H  | 7.18682700  | 0.91736800  | -0.70076000 |
| H  | 7.23718300  | -1.36917200 | -1.68738900 |
| C  | 2.31064100  | 2.23235800  | -1.19395900 |
| H  | 3.00874400  | 3.03070600  | -0.92414900 |
| H  | 2.47047600  | 1.97797300  | -2.24362000 |
| H  | 1.29718900  | 2.61245700  | -1.08616100 |

### B

|    |             |             |             |
|----|-------------|-------------|-------------|
| N  | 0.06989700  | 1.10540700  | 0.19041200  |
| P  | -2.25456900 | -1.05004700 | -0.38426800 |
| Ir | 0.05040100  | -1.20193600 | -0.25116800 |
| H  | 1.22395800  | -1.04403900 | -1.42471700 |
| C  | 1.98814800  | -2.02772900 | 0.67439300  |
| C  | 2.39912500  | -1.58952300 | -0.64831600 |
| C  | 1.03815900  | 3.24140600  | 0.04800400  |
| H  | 1.86658600  | 3.20875500  | -0.66189500 |
| H  | 1.02731500  | 4.20008400  | 0.56158500  |
| C  | -0.60510200 | 1.86774200  | -0.60423100 |
| O  | -0.20346500 | 3.14050200  | -0.71420600 |
| C  | 0.98771100  | 2.00565100  | 0.96112500  |
| C  | -1.81228200 | 1.47831900  | -1.43999100 |
| N  | -2.67447100 | 0.56999000  | -0.66611600 |
| H  | -3.65329900 | 0.69708000  | -0.89631900 |
| C  | -2.86062400 | -2.05527400 | -1.79663200 |
| H  | -2.56253900 | -3.09650300 | -1.65809900 |
| H  | -3.94537100 | -1.99249400 | -1.90453200 |
| H  | -2.38201800 | -1.67616500 | -2.70168400 |
| C  | -3.29304200 | -1.55290800 | 1.09189000  |
| C  | -3.08259200 | -3.06043100 | 1.33545700  |
| H  | -2.02410000 | -3.29954200 | 1.47566200  |
| H  | -3.61804400 | -3.34867300 | 2.24604000  |

|   |             |             |             |
|---|-------------|-------------|-------------|
| H | -3.47409500 | -3.67044400 | 0.51621000  |
| C | -2.85462100 | -0.75281800 | 2.32930700  |
| H | -3.52747400 | -0.98955100 | 3.16027400  |
| H | -1.84033900 | -1.01420300 | 2.63473100  |
| H | -2.89773700 | 0.32450500  | 2.15030700  |
| C | -4.78283000 | -1.26387800 | 0.80471200  |
| H | -5.37290900 | -1.60492600 | 1.66152500  |
| H | -4.97819700 | -0.19340900 | 0.68665100  |
| H | -5.15635000 | -1.79212100 | -0.07629100 |
| H | -0.30943900 | -1.59436400 | 1.28310000  |
| H | -0.12851500 | -2.70110300 | -0.65675200 |
| C | -2.62518500 | 2.70320500  | -1.93679900 |
| H | -1.89485500 | 3.36398900  | -2.41390900 |
| C | -3.30499000 | 3.48017200  | -0.79927700 |
| H | -3.81780000 | 4.35706800  | -1.20521500 |
| H | -4.05314400 | 2.87124300  | -0.28145000 |
| H | -2.57836400 | 3.82373400  | -0.06028600 |
| C | -3.63823900 | 2.27980400  | -3.01247400 |
| H | -4.11035200 | 3.16582500  | -3.44620500 |
| H | -3.15661000 | 1.72110300  | -3.82162800 |
| H | -4.44474000 | 1.65733500  | -2.60665200 |
| H | -1.40454900 | 0.98486200  | -2.33583400 |
| C | 0.45781100  | 2.31758000  | 2.39996600  |
| C | -0.92906000 | 2.98747800  | 2.34706800  |
| H | -0.91499700 | 3.93314200  | 1.79650600  |
| H | -1.67032100 | 2.33157300  | 1.88155800  |
| H | -1.27150300 | 3.20691200  | 3.36271600  |
| C | 1.46387000  | 3.25987500  | 3.09310200  |
| H | 1.16873300  | 3.40948600  | 4.13651500  |
| H | 2.47305000  | 2.83254700  | 3.08886000  |
| H | 1.51121200  | 4.24809100  | 2.62531000  |
| H | 1.97202600  | 1.54093100  | 1.02477800  |
| C | 0.35755900  | 1.02682300  | 3.23062400  |
| H | -0.16845500 | 0.24344600  | 2.68560300  |
| H | 1.34801200  | 0.65456200  | 3.50019400  |
| H | -0.18342300 | 1.22352000  | 4.16183400  |
| H | -0.18692200 | -0.77369700 | -1.82970000 |
| C | 1.86973000  | -3.51713500 | 0.96490100  |
| H | 1.41034400  | -4.09080000 | 0.16252100  |
| H | 2.87789600  | -3.91739400 | 1.13874100  |
| H | 1.28296800  | -3.67468300 | 1.87168300  |
| C | 2.69750900  | -2.64890800 | -1.71841700 |
| H | 3.65189200  | -3.12399300 | -1.46780000 |
| H | 1.92523500  | -3.41493100 | -1.77207800 |
| H | 2.79654700  | -2.18222000 | -2.70069800 |
| C | 3.30761400  | -0.38335000 | -0.79589900 |
| C | 2.96917000  | 0.73420500  | -1.56794800 |
| C | 4.59901900  | -0.46332000 | -0.25229300 |
| C | 3.89234800  | 1.76192500  | -1.77399800 |
| H | 1.97805600  | 0.80765100  | -2.00432100 |
| C | 5.51801100  | 0.56709600  | -0.44987600 |
| H | 4.88941400  | -1.33845800 | 0.32029800  |
| C | 5.16626300  | 1.68589200  | -1.20867800 |
| H | 3.61423900  | 2.61962800  | -2.37942900 |
| H | 6.50990100  | 0.49160900  | -0.01494200 |
| C | 2.46315600  | -1.27063500 | 1.89863100  |
| H | 3.45601400  | -1.64150100 | 2.18259200  |
| H | 2.54792100  | -0.20050500 | 1.73467500  |
| H | 1.79051600  | -1.44977600 | -2.73625300 |
| H | 5.88180100  | 2.48717500  | -1.36489200 |

### C

|    |             |             |             |
|----|-------------|-------------|-------------|
| N  | 0.03960200  | 1.06504800  | -0.24047900 |
| P  | -2.30796000 | -1.05523400 | -0.29206600 |
| Ir | -0.01412000 | -1.21971600 | 0.00507600  |
| H  | -0.72908400 | -1.31046000 | -1.45667100 |
| C  | 2.33822900  | -1.72401000 | -0.43935700 |
| C  | 1.52709400  | -1.60163400 | -1.64000000 |
| C  | 0.95810900  | 3.02850500  | -1.14118100 |
| H  | 1.60152800  | 2.78325500  | -1.99001400 |
| H  | 1.06375300  | 4.08313100  | -0.89688500 |
| C  | -0.79138500 | 1.63288100  | -1.04612800 |
| O  | -0.42459500 | 2.81332300  | -1.56227700 |
| C  | 1.11837200  | 2.06224000  | 0.04733000  |
| C  | -2.13584400 | 1.08672500  | -1.49119600 |
| N  | -2.80628600 | 0.42794200  | -0.36048000 |
| H  | -3.81222100 | 0.54232800  | -0.39375700 |
| C  | -3.16081200 | -2.41308100 | -0.60466400 |
| H  | -2.76804600 | -3.37333100 | -0.26366500 |
| H  | -4.24189200 | -2.38179600 | -0.45586800 |
| H  | -2.93645900 | -2.30556900 | -1.66754500 |
| C  | -3.03856600 | -1.06275200 | 2.02018700  |
| C  | -2.77117300 | -2.44472000 | 2.64764400  |
| H  | -1.70197900 | -2.67716000 | 2.66308200  |
| H  | -3.12982200 | -2.43856700 | 3.68210400  |
| H  | -3.29600200 | -3.24710700 | 2.12108000  |
| C  | -2.38303300 | 0.03727600  | 2.86977400  |
| H  | -2.88263900 | 0.07837100  | 3.84341600  |
| H  | -1.32685800 | -0.17081500 | 3.04738900  |
| H  | -2.47121800 | 1.02010500  | 2.39928100  |
| C  | -4.55875400 | -0.79815800 | 1.94374800  |
| H  | -4.97013200 | -0.84927200 | 2.95710200  |
| H  | -4.78194100 | 0.20171300  | 1.55859300  |
| H  | -5.09191700 | -1.53729800 | 1.34064900  |
| H  | 1.43434300  | -1.37857000 | 0.80207500  |
| H  | -0.16115700 | -2.77673500 | 0.13451400  |
| C  | -3.05198600 | 2.17832100  | -2.10403800 |
| H  | -2.44361200 | 2.67333100  | -2.86735300 |
| C  | -3.49154600 | 3.23687900  | -1.08090000 |
| H  | -4.07468200 | 4.01574700  | -1.58090700 |
| H  | -4.12232500 | 2.80729000  | -0.29547700 |
| H  | -2.63189200 | 3.71168300  | -0.60222900 |
| C  | -4.25646900 | 1.54102000  | -2.81331000 |
| H  | -4.83026600 | 2.31138900  | -3.33604000 |
| H  | -3.93951500 | 0.79495300  | -3.54934100 |
| H  | -4.94373300 | 1.05177300  | -2.11337900 |
| H  | -1.90532400 | 0.37123800  | -2.29666200 |
| C  | 0.95604900  | 2.75295100  | 1.43968000  |
| C  | -0.37890300 | 3.51602400  | 1.53461400  |
| H  | -0.46207800 | 4.30952400  | 0.78526600  |
| H  | -1.23098200 | 2.84022500  | 1.41310000  |
| H  | -0.46691500 | 3.98605700  | 2.51880800  |
| C  | 2.13792100  | 3.72677000  | 1.62661700  |
| H  | 2.09767700  | 4.16821000  | 2.62743200  |
| H  | 3.09558700  | 3.20361700  | 1.52715100  |
| H  | 2.12372600  | 4.55170500  | 0.90743000  |
| H  | 2.08437800  | 1.55739300  | 0.02036100  |
| C  | 1.01211300  | 1.70613000  | 2.56376300  |
| H  | 0.26219300  | 0.93124700  | 2.418151    |

|   |             |             |             |
|---|-------------|-------------|-------------|
| H | 0.83091100  | 2.18663400  | 3.53080000  |
| H | -0.01533700 | -1.12528200 | 1.63293700  |
| C | 3.41672300  | -0.71596400 | -0.09491100 |
| C | 3.62299600  | -0.31495500 | 1.23275200  |
| C | 4.33294900  | -0.29627900 | -1.06995500 |
| C | 4.67152100  | 0.53847200  | 1.57078600  |
| H | 2.94324000  | -0.66335200 | 2.00501600  |
| C | 5.38807000  | 0.55483200  | -0.73330300 |
| H | 4.23798400  | -0.64119300 | -2.09246200 |
| C | 5.55253400  | 0.98742000  | 0.58315400  |
| H | 4.79772100  | 0.85234900  | 2.60230000  |
| H | 6.08167000  | 0.87564900  | -1.50439800 |
| C | 2.73045100  | -3.12314300 | 0.04065300  |
| H | 3.54566200  | -3.47887600 | -0.59952500 |
| H | 3.09987900  | -3.08679300 | 1.06708100  |
| H | 1.90671700  | -3.83264500 | -0.00783000 |
| C | 1.22433800  | -2.86323700 | -2.44086700 |
| H | 2.14513700  | -3.19165100 | -2.94125900 |
| H | 0.84997700  | -3.68727700 | -1.83646900 |
| H | 0.47956700  | -2.64598300 | -3.20891400 |
| H | 6.36708200  | 1.65695400  | 0.84122300  |
| H | 1.65319800  | -0.38511900 | -2.54855800 |
| C | 1.96177600  | 0.51193800  | -2.02000600 |
| H | 2.39684300  | -0.58971400 | -3.32823500 |
| H | 0.70467100  | -0.18826500 | -3.05016500 |

## D

|    |             |             |             |
|----|-------------|-------------|-------------|
| N  | -1.11494300 | 1.26915400  | -0.14274700 |
| F  | -1.04758100 | -1.97052700 | 0.05147200  |
| Ir | 0.56519600  | -0.32968500 | -0.20112100 |
| H  | 0.03577100  | -0.66916600 | -1.70631200 |
| C  | 2.56051600  | 1.02640000  | -0.44783900 |
| C  | 1.91828500  | 0.71803700  | -1.70899100 |
| C  | -2.22836000 | 3.29947200  | -0.56884000 |
| H  | -1.81791000 | 3.79232700  | -1.45435000 |
| H  | -2.92461900 | 3.96822900  | -0.06721700 |
| C  | -2.21390200 | 1.07053600  | -0.78950800 |
| O  | -2.98473200 | 2.14061800  | -1.02177500 |
| C  | -1.14097800 | 2.68726100  | 0.33526100  |
| C  | -2.72157400 | -0.25087600 | -1.34224800 |
| N  | -2.55793800 | -1.30659900 | -0.33028000 |
| H  | -3.31373500 | -1.98102000 | -0.35282600 |
| C  | -0.71729000 | -3.37006800 | -1.08845200 |
| H  | 0.24836000  | -3.81920300 | -0.84557700 |
| H  | -1.50171000 | -4.12790900 | -1.03670200 |
| H  | -0.66496900 | -2.96723500 | -2.10145100 |
| C  | -1.29399400 | -2.72516600 | 1.75145700  |
| H  | 0.04712700  | -3.31871200 | 2.22474400  |
| C  | 0.82547500  | -2.55378000 | 2.29128000  |
| H  | -0.09031200 | -3.75099100 | 3.22135200  |
| H  | 0.40164800  | -4.11716200 | 1.56583600  |
| C  | -1.76731800 | -1.63159000 | 2.72359400  |
| H  | -1.88044200 | -2.06760300 | 3.72164500  |
| H  | -1.04873500 | -0.81293300 | 2.79575800  |
| H  | -2.73120400 | -1.21703500 | 2.41880300  |
| C  | -2.36150200 | -3.83959000 | 1.68461400  |
| C  | -2.52110100 | -4.22816300 | 2.69577200  |
| H  | -3.32920100 | -3.47205400 | 1.32771600  |
| H  | -2.05128900 | -4.67994500 | 1.05884700  |
| H  | 1.63982000  | 0.49640500  | 0.76252800  |
| H  | 1.59574000  | -1.50569200 | -0.29028500 |
| H  | -4.19348300 | -0.18483400 | -1.82453200 |
| H  | -4.24771600 | 0.68932000  | -2.48096400 |
| C  | -5.19803400 | 0.01352500  | -0.67825500 |
| H  | -6.20423200 | 0.14306000  | -1.08745900 |
| H  | -5.22766000 | -0.85179000 | -0.00785700 |
| H  | -4.95750600 | 0.89632300  | -0.08164900 |
| H  | -4.54021300 | -1.42111600 | -2.66875700 |
| H  | -5.54547400 | -1.31611500 | -3.08651400 |
| H  | -3.83855600 | -1.54915500 | -3.49945400 |
| H  | -4.53437900 | -2.34438600 | -2.07789600 |
| H  | -2.10032300 | -0.44703500 | -2.22962500 |
| C  | -1.41234100 | 2.82971500  | 1.86385800  |
| C  | -2.75397500 | 2.18182100  | 2.24963200  |
| H  | -3.60134100 | 2.65779700  | 1.74537700  |
| H  | -2.76228700 | 1.11719800  | 2.00150500  |
| H  | -2.91875200 | 2.27565800  | 3.32739300  |
| C  | -1.43021600 | 4.33403000  | 2.20799300  |
| H  | -1.55681200 | 4.46272200  | 3.28734100  |
| H  | -0.48863100 | 4.81613700  | 1.92132400  |
| H  | -2.24911900 | 4.87121200  | 1.72008400  |
| H  | -0.17841700 | 3.15185100  | 0.12533600  |
| C  | -0.27405900 | 2.17395200  | 2.66382100  |
| H  | -0.23015700 | 1.10106400  | 2.48693200  |
| H  | 0.69877500  | 2.59943000  | 2.39489400  |
| H  | -0.42720200 | 2.33870700  | 3.73513500  |
| H  | 0.62180800  | -0.45717900 | 1.42497000  |
| C  | 3.84984200  | 0.30844900  | -0.08756400 |
| C  | 3.98227200  | -0.62210800 | 0.94833600  |
| C  | 4.99522900  | 0.68649100  | -0.80733100 |
| C  | 5.22917300  | -1.17732500 | 1.24713700  |
| C  | 3.11027800  | -0.92568700 | 1.51548200  |
| H  | 6.23875300  | 0.13014200  | -0.51067100 |
| H  | 4.91250400  | 1.41536800  | -1.60858600 |
| C  | 6.35988800  | -0.80720600 | 0.51828000  |
| H  | 5.31131200  | -1.90179700 | 2.05192600  |
| H  | 7.11084000  | 0.42876700  | -1.08459300 |
| C  | 2.57561700  | 2.46463000  | 0.06742800  |
| H  | 3.32955800  | 3.01513600  | -0.50553200 |
| H  | 1.62622400  | 2.97751300  | -0.05521000 |
| H  | 2.86112800  | 2.49881300  | 1.12035000  |
| C  | 1.20137900  | 1.82238800  | -2.46847200 |
| H  | 0.56388800  | 2.44125700  | -1.84187000 |
| H  | 1.94839700  | 2.47426800  | -2.94057900 |
| H  | 0.57928600  | 1.39321100  | -3.25597300 |
| H  | 7.32716000  | -1.24273200 | 0.74971200  |
| C  | 2.57777400  | -0.28959200 | -2.64352500 |
| C  | 3.37176200  | 0.21714300  | -3.20700400 |
| C  | 3.02449700  | -1.12813600 | -2.11137100 |
| H  | 1.84946300  | -0.67618300 | -3.35779800 |

## E

|    |             |             |             |
|----|-------------|-------------|-------------|
| N  | -0.78939000 | 1.30680900  | -0.56803300 |
| F  | -1.51309700 | -1.69564600 | 0.39276000  |
| Ir | 0.13386900  | -0.86095400 | -1.09162500 |
| H  | 0.06804900  | -0.36741000 | -2.61574500 |
| C  | 2.62864500  | -1.01689900 | -0.62333300 |
| C  | 2.27962600  | -0.46908900 | -1.91289100 |

|   |             |             |             |
|---|-------------|-------------|-------------|
| C | -1.36803200 | 3.45452400  | -1.34634800 |
| H | -1.28116800 | 3.48610600  | -2.43609200 |
| H | -1.54359600 | 4.45760800  | -0.96186400 |
| C | -2.07015200 | 1.43587500  | -0.67898100 |
| O | -2.53735600 | 2.64631200  | -1.02126300 |
| C | -0.21717900 | 2.68570200  | -0.67643300 |
| C | -3.12942100 | 0.36251800  | -0.45241700 |
| N | -2.75938500 | -0.54983800 | 0.63087800  |
| H | -2.66820100 | -0.06100500 | 1.51459100  |
| C | -2.36278100 | -3.12874300 | -0.36074500 |
| H | -1.63847600 | -3.93014300 | -0.52413700 |
| H | -3.18432300 | -3.47658900 | 0.26727900  |
| H | -2.75446300 | -2.82020200 | -1.33227900 |
| C | -1.06852000 | -2.18961500 | 2.14785400  |
| C | 0.02294900  | -3.27338400 | 2.07273500  |
| H | 0.91534900  | -2.92064600 | 1.55115100  |
| H | 0.31420300  | -3.55770800 | 3.08889300  |
| H | -0.33140200 | -4.17526800 | 1.56485400  |
| C | -0.54184700 | -0.95045400 | 2.89779100  |
| H | -0.12422400 | -1.26482600 | 3.85969100  |
| H | 0.24171400  | -0.43395500 | 2.34168000  |
| H | -1.33183800 | -0.22499900 | 3.11741700  |
| C | -2.30704700 | -2.74881000 | 2.88091100  |
| H | -2.03633700 | -2.93988000 | 3.92468900  |
| H | -3.14552400 | -2.04705800 | 2.87382300  |
| H | -2.64528200 | -3.69553600 | 2.45244200  |
| H | 1.13682100  | -1.11290200 | 0.22978800  |
| H | 0.41442100  | -2.31666300 | -1.57131100 |
| C | -4.54952900 | 0.94138700  | -0.21618300 |
| H | -4.72925300 | 1.64649700  | -1.03410200 |
| C | -4.66554400 | 1.70667300  | 1.11057900  |
| H | -5.65103600 | 2.17545100  | 1.18472200  |
| H | -4.56633700 | 1.03391800  | 1.97006400  |
| H | -3.91334300 | 2.49583500  | 1.19506600  |
| C | -5.59305600 | -0.17926700 | -0.30391300 |
| H | -6.59979500 | 0.23212000  | -0.18450600 |
| H | -5.54956400 | -0.69071900 | -1.27161800 |
| H | -5.43244200 | -0.92398000 | 0.48122300  |
| H | -3.17660200 | -0.21808700 | -1.38155600 |
| C | 0.21574100  | 3.25287300  | 0.71101000  |
| C | -0.97776900 | 3.34436000  | 1.68019000  |
| H | -1.77993500 | 3.98270800  | 1.29738200  |
| H | -1.39531500 | 2.35427400  | 1.88690600  |
| H | -0.64938500 | 3.76663800  | 2.63478000  |
| C | 0.82430900  | 4.65311700  | 0.49833300  |
| H | 1.21648800  | 5.03429000  | 1.44659900  |
| H | 1.65302600  | 4.61991800  | -0.21779000 |
| H | 0.09031600  | 5.37902300  | 0.13448300  |
| H | 0.65248200  | 2.66120000  | -1.32894800 |
| C | 1.28335400  | 2.33565100  | 1.32174900  |
| H | 0.93030200  | 1.30583800  | 1.37139700  |
| H | 2.20796100  | 2.34199400  | 0.73884300  |
| H | 1.53535400  | 2.66085000  | 2.33585500  |
| C | 3.00638000  | -2.49095700 | -0.52128900 |
| H | 2.37737900  | -3.14133500 | -1.12527700 |
| H | 4.04455500  | -2.58482000 | -0.86218100 |
| H | 2.97290300  | -2.83152500 | 0.51442300  |
| H | -1.21623400 | -0.96566600 | -1.93590200 |
| C | 2.47785300  | 1.01033100  | -2.21241200 |
| H | 3.47127900  | 1.16852500  | -2.64977200 |
| H | 1.74749100  | 1.34478900  | -2.95123400 |
| H | 2.40076600  | 1.63662400  | -1.32692000 |
| C | 3.33817600  | -0.21629500 | 0.44303000  |
| C | 4.43284600  | 0.58999000  | 0.09779900  |
| C | 3.05805500  | -0.40743700 | 1.80433700  |
| C | 5.18421500  | 1.23307100  | 1.08446400  |
| H | 4.71997300  | 0.70642300  | -0.93962700 |
| C | 3.79947200  | 0.23824400  | 2.78969400  |
| H | 2.24452900  | -1.06056000 | 2.09795000  |
| C | 4.86236000  | 1.07227900  | 2.43184900  |
| H | 6.02360000  | 1.85697800  | 0.79318900  |
| H | 3.54736100  | 0.08957400  | 3.83509900  |
| H | 5.44050800  | 1.58046600  | 3.19737400  |
| C | 2.53962900  | -1.31918500 | -3.15423800 |
| H | 2.18458400  | -2.34450200 | -3.07198100 |
| H | 2.05907300  | -0.86713800 | -4.02433400 |
| H | 3.62221700  | -1.34442400 | -3.33940400 |

## F

|    |             |             |             |
|----|-------------|-------------|-------------|
| N  | -1.24529300 | 1.23305500  | -0.14536800 |
| F  | -0.84926000 | -1.97465800 | -0.05480100 |
| Ir | 0.57628000  | -0.21343400 | -0.55163600 |
| H  | 0.88042400  | 0.55254900  | -2.00626800 |
| C  | 2.44730500  | 1.06433800  | -0.24145700 |
| C  | 2.11356300  | 1.28524800  | -1.64354000 |
| C  | -2.52893600 | 3.16922900  | -0.47812100 |
| H  | -2.16498900 | 3.66567800  | -1.38237000 |
| H  | -3.24733500 | 3.80829600  | 0.03058800  |
| C  | -2.36914500 | 0.95213400  | -0.71781700 |
| O  | -3.23307900 | 1.96044500  | -0.89157700 |
| C  | -1.39468100 | 2.62085500  | -0.04326700 |
| C  | -2.82930200 | -0.41249500 | -1.20037100 |
| N  | -2.45017500 | -1.42742000 | -0.20245800 |
| H  | -3.13362800 | -2.17409400 | -0.14787800 |
| C  | -0.59902300 | -3.32960300 | -1.26958800 |
| H  | 0.44515500  | -3.64836100 | -1.25233800 |
| H  | -1.25056800 | -4.18244900 | -1.06585300 |
| H  | -0.82178400 | -2.93020900 | -2.26127100 |
| C  | -0.79119800 | -2.78805600 | 1.63180100  |
| C  | -0.54391600 | -3.54972500 | 1.74895700  |
| H  | 1.40033300  | -2.89555500 | 1.56349100  |
| H  | 0.63782400  | -3.94358100 | 2.76613000  |
| H  | 0.59985600  | -4.39735100 | 1.06029900  |
| C  | -0.88843800 | -1.72162400 | 2.73450300  |
| H  | -0.96234000 | -2.22224900 | 3.70568300  |
| H  | -0.00357000 | -1.08302200 | 2.75340700  |
| H  | -1.77068100 | -1.08911100 | 2.60912100  |
| C  | -1.974      |             |             |

|   |             |             |             |
|---|-------------|-------------|-------------|
| H | -5.74291100 | -1.74648500 | -2.57041800 |
| H | -4.08432000 | -1.84537500 | -3.18517200 |
| H | -4.53344200 | -2.66448400 | -1.68057100 |
| H | -2.31605500 | -0.57812200 | -2.15964200 |
| C | -1.71202900 | 2.62993100  | 1.93397000  |
| C | -3.00485000 | 1.84968600  | 2.24027300  |
| H | -3.87563300 | 2.28088800  | 1.73894500  |
| H | -2.92127800 | 0.80139500  | 1.93959900  |
| H | -3.20385200 | 1.87283000  | 3.31591900  |
| C | -1.87233800 | 4.09544100  | 2.38796100  |
| H | -1.98666200 | 4.13213800  | 3.47590400  |
| H | -0.99029800 | 4.69007900  | 2.12448400  |
| H | -2.75232700 | 4.57947300  | 1.95340200  |
| H | -0.47773500 | 3.18581900  | 0.23660800  |
| C | -0.54381400 | 2.00825100  | 2.71954800  |
| H | -0.25891900 | 1.03904300  | 2.31166800  |
| H | 0.33343100  | 2.65925700  | 2.70073900  |
| H | -0.82952400 | 1.87258900  | 3.76758200  |
| H | -0.16120800 | -0.52604800 | -1.99212400 |
| C | 2.94582900  | 0.59858000  | -2.72774600 |
| H | 3.82924300  | 1.21150700  | -2.93063800 |
| H | 3.27611900  | -0.39302100 | -2.42159500 |
| H | 2.37610900  | 0.51342600  | -3.65645400 |
| C | 2.27067200  | 2.21058800  | 0.74314900  |
| H | 3.07975300  | 2.93697000  | 0.59317600  |
| H | 1.32600400  | 2.73341500  | 0.63249000  |
| H | 2.33762600  | 1.83613100  | 1.76427200  |
| C | 3.70990000  | 0.29306400  | 0.09515800  |
| C | 3.74869400  | -0.85170900 | 0.89933800  |
| C | 4.93087200  | 0.85742100  | -0.31452600 |
| C | 4.96529000  | -1.43902300 | 1.25324500  |
| C | 2.81770800  | -1.28201600 | 1.24337200  |
| C | 6.14775100  | 0.27106900  | 0.03318200  |
| C | 4.92955200  | 1.76895000  | -0.90537800 |
| C | 6.16960000  | -0.88602600 | 0.81530800  |
| C | 4.96705500  | -2.33124100 | 1.87274300  |
| H | 7.07666900  | 0.72148400  | -0.30407500 |
| H | 7.11509500  | -1.34629300 | 1.08613200  |
| C | 1.59312800  | 2.65408200  | -2.07478400 |
| H | 1.22491100  | 2.62111300  | -3.10269900 |
| H | 0.79336300  | 3.02683300  | -1.43877700 |
| H | 2.42571000  | 3.36537800  | -2.03124800 |

**G**

|    |             |             |             |
|----|-------------|-------------|-------------|
| N  | 1.12126600  | 1.11016500  | 0.50832500  |
| F  | 0.73385000  | -1.93114700 | -0.55649400 |
| Ir | -0.58797000 | -0.02637000 | -0.57452900 |
| H  | -0.84156600 | -0.76650400 | 0.85701700  |
| C  | -2.27086900 | 1.72159800  | -0.78612800 |
| C  | -2.33706700 | 0.99531000  | 0.46789300  |
| C  | 2.13558400  | 2.71293500  | 1.89973800  |
| H  | 1.41328300  | 3.11308700  | 2.61667900  |
| H  | 3.05952000  | 3.28499900  | 1.95271800  |
| C  | 1.75111200  | 0.54654500  | 1.48363800  |
| O  | 2.44409700  | 1.34691000  | 2.30288500  |
| C  | 1.54895200  | 2.54431900  | 0.48513400  |
| C  | 1.76914300  | -0.93574000 | 1.81393500  |
| N  | 1.97168100  | -1.70995400 | 0.57871100  |
| H  | 2.54261600  | -2.53292600 | 0.73089500  |
| C  | -0.25532700 | -3.39503200 | -0.05688200 |
| H  | -1.10997800 | -3.50937600 | -0.72722200 |
| H  | 0.34288000  | -4.30824400 | -0.06100800 |
| H  | -0.62630400 | -3.21350500 | 0.95406300  |
| C  | 1.63190900  | -2.42450100 | -2.12769000 |
| O  | 0.57757300  | -2.70273200 | -3.21667300 |
| H  | -0.04875200 | -1.82562200 | -3.40309800 |
| H  | 1.09122700  | -2.95634100 | -4.14980600 |
| H  | -0.07175900 | -3.54479900 | -2.95849300 |
| C  | 2.56555700  | -1.28511100 | -2.56742500 |
| H  | 3.10514800  | -1.59693300 | -3.46780600 |
| C  | 2.01056900  | -0.37736600 | -2.81056600 |
| H  | 3.29991000  | -1.04709100 | -1.79401100 |
| C  | 2.47589100  | -3.69380300 | -1.87414900 |
| C  | 2.98075600  | -3.96474200 | -2.80709400 |
| H  | 3.25764700  | -3.52888000 | -1.12574300 |
| H  | 1.87231900  | -4.55284400 | -1.57148400 |
| H  | -0.97286500 | 1.22549600  | -1.59338300 |
| H  | -1.68915700 | -0.90323400 | -1.26163800 |
| C  | 2.83227700  | -1.31503600 | 2.87579200  |
| C  | 2.67625500  | -0.62107100 | 3.70767200  |
| C  | 4.27652300  | -1.14619700 | 2.37742300  |
| H  | 4.97411600  | -1.34965900 | 3.19515100  |
| H  | 4.51382800  | -1.84232200 | 1.56610400  |
| H  | 4.46158600  | -0.13124700 | 2.01842500  |
| C  | 2.58055100  | -2.73690800 | 3.40235500  |
| H  | 3.27337700  | -2.96011600 | 4.21850600  |
| H  | 1.55980900  | -2.84885100 | 3.78212100  |
| H  | 2.73645000  | -3.50045800 | 2.63135600  |
| H  | 0.78272500  | -1.14052500 | 2.25804600  |
| C  | 2.53912000  | 2.88053600  | -0.67114400 |
| C  | 3.81428700  | 2.02368800  | -0.57553200 |
| H  | 4.37014800  | 2.21158700  | 0.34898800  |
| H  | 3.57576300  | 0.95737500  | -0.62037700 |
| C  | 4.48209000  | 2.25303700  | -1.41154100 |
| C  | 2.89737500  | 4.37824900  | -0.57435400 |
| H  | 3.54719900  | 4.65537600  | -1.41012500 |
| H  | 1.99912600  | 5.00385200  | -0.62739700 |
| H  | 3.43159200  | 4.62808200  | 0.34734400  |
| H  | 0.67051900  | 3.17630400  | 0.36263200  |
| C  | 1.85758800  | 2.63849400  | -2.02799700 |
| H  | 1.61633500  | 1.58643900  | -2.16537700 |
| H  | 0.92860300  | 3.21283600  | -2.11462100 |
| H  | 2.52150000  | 2.94849600  | -2.84130700 |
| H  | 0.09695900  | 0.14550200  | -2.04084500 |
| C  | -3.26303700 | 1.38829100  | -1.89478700 |
| H  | -4.17661100 | 1.96709700  | -1.72194500 |
| H  | -2.86341000 | 1.67316500  | -2.87093300 |
| C  | -3.52437900 | 0.33166500  | -1.91090100 |
| C  | -1.88645700 | 1.68247200  | 1.75638000  |
| H  | -0.91957900 | 2.17272300  | 1.66343300  |
| H  | -2.62828100 | 2.43435100  | 2.05186400  |
| H  | -1.81250700 | 0.94590800  | 2.55774000  |
| C  | -3.56769700 | 0.13921500  | 0.71143400  |
| C  | -3.57814000 | -1.25078800 | 0.87009200  |
| C  | -4.78021700 | 0.83465800  | 0.87304800  |
| C  | -4.76326900 | -1.92327300 | 1.16681900  |
| H  | -2.65710000 | -1.80491100 | 0.74805600  |
| C  | -5.96457100 | 0.16012000  | 1.16688500  |
| H  | -4.79721400 | 1.91642800  | 0.76867600  |
| C  | -5.96104200 | -1.22930200 | 1.31340300  |

|   |             |             |             |
|---|-------------|-------------|-------------|
| H | -4.74504800 | -3.00935800 | 1.28034900  |
| H | -6.88786600 | 0.72037000  | 1.28131800  |
| H | -6.88172400 | -1.75850400 | 1.54011400  |
| C | -1.87057300 | 3.18826600  | -0.79570200 |
| H | -2.76596400 | 3.76546900  | -0.53645600 |
| H | -1.10243800 | 3.43592600  | -0.06955500 |
| H | -1.53982500 | 3.50914400  | -1.76574100 |

**H**

|    |             |             |             |
|----|-------------|-------------|-------------|
| N  | 0.26479500  | 0.92454100  | 0.49505600  |
| F  | -2.26762200 | -0.75195800 | -0.58496100 |
| Ir | -0.07146000 | -1.28172200 | -0.07654600 |
| H  | -0.08110200 | -0.79557200 | -1.63320500 |
| C  | 2.08083900  | -2.27894000 | 0.47507900  |
| C  | 2.06438400  | -1.63351400 | -0.83293100 |
| C  | 1.55758600  | 2.88204800  | 0.71875200  |
| C  | 2.45713100  | 2.83932500  | 0.10297500  |
| H  | 1.59074900  | 3.75156100  | 1.37203000  |
| C  | -0.18513100 | 1.86603300  | -0.26246900 |
| O  | 0.41921200  | 3.05689000  | -0.17722800 |
| C  | 1.25459700  | 1.54634700  | 1.42468400  |
| C  | -1.31064100 | 1.76421900  | -1.27708500 |
| N  | -2.39329300 | 0.92834700  | -0.74201400 |
| H  | -3.30815200 | 1.24606500  | -1.03910000 |
| C  | -2.76265500 | -1.53685300 | -2.16812600 |
| H  | -2.65095800 | -2.62029700 | -2.08804700 |
| H  | -3.79052100 | -1.28971100 | -2.43951600 |
| H  | -2.08330400 | -1.17604700 | -2.94269800 |
| C  | -3.60709600 | -1.18075300 | 0.65606900  |
| C  | -3.63037900 | -2.71094000 | 0.83562800  |
| H  | -2.65980300 | -3.09212200 | 1.16589700  |
| H  | -4.37208100 | -2.96701400 | 1.59927800  |
| H  | -3.91338100 | -3.22937200 | -0.08535500 |
| H  | -3.30521000 | -0.49034500 | 1.99712500  |
| H  | -4.12166800 | -0.70144000 | 2.69558800  |
| H  | -2.38150100 | -0.86141300 | 2.44553600  |
| C  | -3.22330800 | 0.59350000  | 1.88289800  |
| C  | -4.97834600 | -0.69290200 | 0.13594400  |
| H  | -5.74245000 | -0.96310900 | 0.87193000  |
| H  | -5.01750800 | 0.39490500  | 0.02156800  |
| H  | -5.26126300 | -1.15933300 | -0.81089900 |
| H  | 0.77404800  | -1.98101200 | 1.18156800  |
| H  | -0.40308900 | -2.73285100 | -0.57259000 |
| C  | -1.85914800 | 3.15085700  | -1.70339100 |
| C  | -0.98185200 | 3.73301200  | -2.00139900 |
| H  | -2.56199400 | 3.89457200  | -0.55698100 |
| H  | -2.86405700 | 4.89087400  | -0.89259600 |
| H  | -3.46510300 | 3.37164800  | -0.22616500 |
| H  | -1.90340500 | 4.01302100  | 0.30690300  |
| C  | -2.76843100 | 3.02024400  | -2.93505200 |
| H  | -3.05596200 | 4.01389600  | -3.29019400 |
| H  | -2.26210100 | 2.49966500  | -3.75447400 |
| H  | -3.69694500 | 2.48001600  | -2.71591300 |
| C  | -0.85829500 | 1.31013100  | -2.17283400 |
| C  | 0.71621900  | 1.69808600  | 2.88034400  |
| C  | -0.55403600 | 2.56834400  | 2.90994400  |
| H  | -0.37300900 | 3.57954800  | 2.53128200  |
| H  | -1.35328400 | 2.11801800  | 2.31392200  |
| H  | -0.91714000 | 2.66456000  | 3.93767100  |
| C  | 1.82463900  | 2.34623000  | 3.73538700  |
| H  | 1.49918900  | 2.40717300  | 4.77853000  |
| H  | 2.74407400  | 1.75043800  | 3.70519500  |
| H  | 2.06864400  | 3.36284500  | 3.41183600  |
| H  | 2.14975500  | 0.92778600  | 1.44083500  |
| C  | 0.39484700  | 0.31763800  | 3.47679700  |
| H  | -0.37080200 | -0.19574900 | 2.89721700  |
| H  | 1.28352700  | -0.31944800 | 3.50821600  |
| H  | 0.03116100  | 0.43011500  | 4.50334100  |
| H  | -0.76699500 | -1.62946100 | 1.35419000  |
| C  | 2.90590700  | -1.74571600 | 1.64586400  |
| H  | 3.90812600  | -2.18084900 | 1.57760900  |
| H  | 3.00722800  | -0.66514000 | 1.65528700  |
| C  | 2.47763900  | -2.07109400 | 2.59614700  |
| C  | 2.06417100  | -2.52330600 | -2.07964800 |
| H  | 3.07041200  | -2.94104400 | -2.21426000 |
| H  | 1.35003600  | -3.34276300 | -2.02575800 |
| C  | 1.82783100  | -1.92602500 | -2.96065600 |
| C  | 2.84991300  | -0.36629100 | -1.10238200 |
| C  | 2.33026500  | 0.64773800  | -1.92433300 |
| C  | 4.19150800  | -0.25419800 | -0.70256900 |
| C  | 3.09371100  | 1.75564000  | -2.28523500 |
| C  | 1.31105800  | 0.55899700  | -2.28019400 |
| H  | 4.95878400  | 0.86065500  | -1.05123300 |
| H  | 4.65966200  | -1.04999100 | -0.13629300 |
| C  | 4.41143100  | 1.87661500  | -1.83473800 |
| H  | 2.65470700  | 2.52781000  | -2.90982300 |
| H  | 5.99016300  | 0.92324600  | -0.71744500 |
| H  | 5.00631700  | 2.74405300  | -2.10364000 |
| C  | 2.00138700  | -3.80378700 | 0.53813500  |
| H  | 1.26484000  | -4.22797400 | -0.13968400 |
| H  | 2.98895300  | -4.20099000 | 0.27614600  |
| H  | 1.76354700  | -4.13207600 | 1.55269300  |

**TSSs for the migratory insertion pathway**

**I**

|    |             |             |             |
|----|-------------|-------------|-------------|
| N  | -0.76164900 | 1.30361300  | -0.56675600 |
| P  | -1.54609300 | -1.70148700 | 0.41017800  |
| Ir | 0.15771400  | -0.89426700 | -1.00921300 |
| H  | -0.33593400 | -0.54524500 | -2.56952400 |
| C  | 2.54636200  | -1.04279000 | -0.58872300 |
| C  | 2.15247900  | -0.51682500 | -1.91405700 |
| C  | -1.32214600 | 3.44995200  | -1.36371300 |
| H  | -1.20915100 | 3.47924800  | -2.45142700 |
| H  | -1.50695300 | 4.45391700  | -0.98612200 |
| C  | -2.03993000 | 1.43379000  | -0.70077800 |
| O  | -2.4        |             |             |

|   |             |             |             |
|---|-------------|-------------|-------------|
| C | -1.13004600 | -2.10595300 | 2.19425800  |
| C | -0.02566300 | -3.18005100 | 2.20039000  |
| H | 0.85457000  | -2.86172200 | 1.63475400  |
| H | 0.28855600  | -3.36977000 | 3.23211200  |
| H | -0.37187600 | -4.12938200 | 1.78091000  |
| C | -0.62931800 | -0.81700000 | 2.86973000  |
| H | -0.33058800 | -1.03853500 | 3.89994500  |
| H | 0.23489300  | -0.39990700 | 2.35046500  |
| H | -1.40685500 | -0.04930500 | 2.89214600  |
| C | -2.36779600 | -2.62858100 | 2.95180700  |
| H | -2.08595100 | -2.83085900 | 3.99095900  |
| H | -3.17758000 | -1.89239700 | 2.97831300  |
| H | -2.75367000 | -3.56126000 | 2.53185000  |
| H | 1.38266700  | -1.12433800 | 0.16545900  |
| H | 0.41396300  | -2.37511200 | -1.42155100 |
| C | -4.52831600 | 0.98224400  | -0.31652500 |
| H | -4.67206000 | 1.69787900  | -1.13112100 |
| C | -4.65237100 | 1.73758100  | 1.01518100  |
| H | -5.64561400 | 2.18944600  | 1.09419300  |
| H | -4.52368300 | 1.07023700  | 1.87331300  |
| H | -3.91033300 | 2.53545500  | 1.09356800  |
| C | -5.61308400 | -0.09747500 | -0.45550100 |
| H | -6.60294400 | 0.36691200  | -0.43004900 |
| H | -5.51800600 | -0.64320100 | -1.39993900 |
| H | -5.58515400 | -0.82886900 | 0.36081000  |
| H | -3.15939100 | -0.15117500 | -1.50868700 |
| C | 0.21421400  | 3.25603300  | 0.72924300  |
| C | -0.99636300 | 3.33252600  | 1.67841400  |
| H | -1.78727200 | 3.98230300  | 1.29034000  |
| H | -1.42332400 | 2.34112400  | 1.85788400  |
| H | -0.68443800 | 3.73877000  | 2.64559800  |
| C | 0.81316800  | 4.66221000  | 0.52833100  |
| H | 1.18370200  | 5.04627900  | 1.48411700  |
| H | 1.65579700  | 4.63746500  | -0.17185000 |
| H | 0.07951800  | 5.38189100  | 0.15149000  |
| H | 0.69626800  | 2.66020300  | -1.29643200 |
| C | 1.28362300  | 2.34803000  | 1.34884200  |
| H | 0.92987300  | 1.31953000  | 1.40980900  |
| H | 2.20671700  | 2.34879600  | 0.76262900  |
| H | 1.53661300  | 2.68267600  | 2.35973200  |
| C | 2.42860700  | -1.38557400 | -3.13946100 |
| H | 3.50727500  | -1.39466900 | -3.35040800 |
| H | 2.09526800  | -2.41787700 | -3.03633300 |
| H | 1.92439400  | -0.96015400 | -4.01127100 |
| H | -1.10484500 | -0.88193600 | -2.11867300 |
| C | 2.39006800  | 0.95216600  | -2.24222600 |
| C | 2.35885000  | 1.59172200  | -1.36267600 |
| H | 3.37182800  | 1.08678600  | -2.71434400 |
| H | 1.64318800  | 1.30048000  | -2.95999900 |
| C | 3.35036600  | -0.21230900 | 0.39935500  |
| C | 4.47054500  | 0.50785400  | -0.03548700 |
| C | 3.10416200  | -0.30119800 | 1.77597400  |
| C | 5.28786500  | 1.17095700  | 0.88307500  |
| H | 4.71998900  | 0.54438300  | -1.08900200 |
| C | 3.91475000  | 0.36221600  | 2.69421100  |
| C | 2.26578200  | -0.88902200 | 2.13533000  |
| C | 5.00638600  | 1.11169000  | 2.24845200  |
| H | 6.14677500  | 1.73110200  | 0.52612800  |
| H | 3.69232500  | 0.29397600  | 3.75475600  |
| H | 5.63770500  | 1.63461800  | 2.96023900  |
| C | 3.02075700  | -2.50113400 | -0.50609900 |
| C | 2.39654100  | -3.18561900 | -1.07717000 |
| H | 4.04304700  | -2.53996300 | -0.89651000 |
| H | 3.04809300  | -2.83535100 | 0.53305000  |

## J

|    |             |             |             |
|----|-------------|-------------|-------------|
| N  | -1.38616900 | 1.15672900  | -0.19648700 |
| P  | -0.64811900 | -1.97310800 | 0.04861200  |
| Ir | 0.55447100  | -0.11948200 | -0.82553400 |
| H  | 0.10695200  | 0.21052800  | -2.40296000 |
| C  | 2.42515000  | 1.10568400  | 0.03243300  |
| C  | 2.05927000  | 1.39903900  | -1.37234000 |
| C  | -2.82799400 | 2.94267400  | -0.67246000 |
| H  | -2.49853700 | 3.37223700  | -1.62312400 |
| H  | -3.59348400 | 3.57272000  | -0.22523000 |
| C  | -2.49253100 | 0.73321600  | -0.71616900 |
| O  | -3.44038400 | 1.64825100  | -0.96013400 |
| C  | -1.65933500 | 2.56545100  | 0.24810100  |
| H  | -2.84352400 | -0.70104900 | -1.07419000 |
| H  | -2.31535800 | -1.60368300 | -0.04083500 |
| H  | -2.91341400 | -2.41243200 | 0.08291000  |
| C  | -0.39689500 | -3.46179600 | -1.00403600 |
| H  | 0.66560300  | -3.71254000 | -1.04084900 |
| H  | -0.96403700 | -4.32183100 | -0.63906100 |
| H  | -0.72660900 | -3.21813600 | -2.01710800 |
| C  | -0.44118500 | -2.59539200 | 1.81366500  |
| C  | 0.87155900  | -3.39485900 | 1.91869000  |
| H  | 1.73880600  | -2.79891900 | 1.62454000  |
| H  | 1.02116000  | -3.69150100 | 2.96235200  |
| H  | 0.85577300  | -4.30724500 | 1.31662600  |
| C  | -0.38673800 | -1.38502700 | 2.75694400  |
| H  | -0.30150100 | -1.73190000 | 3.79246600  |
| H  | 0.47934900  | -0.75250200 | 2.54079200  |
| C  | -1.29034200 | -0.77622500 | 2.67721900  |
| H  | -1.62856100 | -3.50007100 | 2.20503700  |
| H  | -1.45621100 | -3.89591900 | 3.21105100  |
| H  | -2.56898100 | -2.94276200 | 2.23385000  |
| H  | -1.74499800 | -4.35867800 | 1.53570200  |
| H  | 1.53267600  | 0.20657900  | 0.55280000  |
| H  | 1.64372100  | -1.11715800 | -1.32495800 |
| C  | -4.36553700 | -0.92674800 | -1.28244600 |
| H  | -4.68244400 | -0.15017000 | -1.98560700 |
| C  | -5.19133500 | -0.77460700 | 0.00318600  |
| H  | -6.25395100 | -0.90111300 | -0.22454100 |
| H  | -4.92360100 | -1.52820500 | 0.75091800  |
| H  | -5.05754400 | 0.21098700  | 0.45266000  |
| C  | -4.61679400 | -2.28773800 | -1.95134900 |
| H  | -5.67718200 | -2.38982300 | -2.19863900 |
| H  | -4.04035200 | -2.39322300 | -2.87634900 |
| H  | -4.35947200 | -3.12798000 | -1.29601600 |
| H  | -2.38232800 | -0.88587100 | -2.05794900 |
| C  | -1.99798100 | 2.66107600  | 1.77455500  |
| C  | -3.21242500 | 1.78635600  | 2.13944200  |
| H  | -4.11247300 | 2.06511500  | 1.59391800  |
| H  | -3.02167200 | 0.72876800  | 1.93444900  |
| H  | -3.42907600 | 1.88425300  | 3.20739400  |
| C  | -2.30370700 | 4.13471600  | 2.11518800  |
| H  | -2.42306200 | 4.24274600  | 3.19785300  |
| H  | -1.48445800 | 4.79228000  | 1.80316600  |
| H  | -3.22628000 | 4.49517600  | 1.65056100  |

|   |             |             |             |
|---|-------------|-------------|-------------|
| H | -0.79160900 | 3.19327400  | 0.04719600  |
| C | -0.78591300 | 2.22055500  | 2.61388000  |
| H | -0.36826700 | 1.28082400  | 2.25381600  |
| H | 0.00124500  | 2.97823600  | 2.59585200  |
| H | -1.08118100 | 2.08485100  | 3.65918200  |
| C | 2.22060800  | 2.21620500  | 1.06228200  |
| H | 1.25576900  | 2.69832500  | 0.94697500  |
| H | 2.30166400  | 1.82882100  | 2.07943600  |
| H | 2.99528200  | 2.97414800  | 0.91610800  |
| C | 3.00759700  | 0.91526800  | -2.46673200 |
| H | 3.85345500  | 1.61075700  | -2.55351600 |
| H | 3.41244800  | -0.07742300 | -2.27157700 |
| H | 2.49103000  | 0.89533100  | -3.42985800 |
| H | -0.33315400 | -0.58988800 | -2.18021700 |
| C | 1.51124200  | 2.77775700  | -1.71534000 |
| H | 0.72061500  | 3.11693200  | -1.05058000 |
| H | 2.31868200  | 3.52239800  | -1.68121000 |
| H | 1.10802000  | 2.77231200  | -2.73122100 |
| C | 3.72557600  | 0.34982900  | 0.26600800  |
| C | 3.79434900  | -1.01522400 | 0.55051400  |
| C | 4.92023700  | 1.08392600  | 0.18953800  |
| C | 5.02483300  | -1.64166700 | 0.76185300  |
| H | 2.88003600  | -1.59293600 | 0.59031000  |
| C | 6.14997300  | 0.45993900  | 0.39589700  |
| H | 4.89307000  | -2.14356300 | -0.04574500 |
| C | 6.20768800  | -0.90618900 | 0.68576000  |
| H | 5.05304500  | -2.70426300 | 0.98402100  |
| H | 7.06396600  | 1.04216800  | 0.32665600  |
| H | 7.16572900  | -1.39079600 | 0.84731200  |

## K

|    |             |             |             |
|----|-------------|-------------|-------------|
| N  | -1.24519200 | -1.08770100 | 0.33732100  |
| P  | -0.46996000 | 1.94989700  | -0.42919100 |
| Ir | 0.51711000  | -0.15610000 | -0.80888300 |
| H  | 1.38157000  | 0.11602800  | 0.60055400  |
| C  | 1.94433800  | -1.86544800 | -0.59903700 |
| C  | 2.22482300  | -1.06660900 | 0.59799200  |
| C  | -2.33667400 | -2.68517700 | 1.66180000  |
| H  | -1.58751400 | -3.27486800 | 2.19846100  |
| H  | -3.32094700 | -3.12488400 | 1.80674200  |
| H  | -1.64724100 | -0.56610600 | 1.44843100  |
| O  | -2.35990000 | -1.35398000 | 2.26238900  |
| C  | -1.94983900 | -2.40362400 | 0.20020600  |
| C  | -1.37896300 | 0.85092700  | 1.92403000  |
| N  | -1.63416500 | 1.78448500  | 0.81162600  |
| H  | -1.97908800 | -2.67439000 | 1.15489700  |
| C  | 0.74288300  | 3.19188900  | 0.18683900  |
| H  | 1.54540600  | 3.32931900  | -0.54112300 |
| H  | 0.26936500  | 4.15529500  | 0.38823400  |
| H  | 1.17641200  | 2.80956400  | 1.11458900  |
| C  | -1.39762600 | 2.82714900  | -1.80472100 |
| C  | -0.36642000 | 3.23747900  | -2.87530200 |
| H  | 0.22066600  | 2.37908800  | -3.21924200 |
| H  | -0.89495300 | 3.65096200  | -3.74065000 |
| H  | 0.32315300  | 4.00497700  | -2.51215700 |
| C  | -2.42879400 | 1.86491600  | -2.41687400 |
| H  | -3.03137300 | 2.40507300  | -3.15473400 |
| H  | -1.94564100 | 1.03527100  | -2.93815700 |
| H  | -3.10328900 | 1.45625200  | -1.65988600 |
| C  | -2.13284000 | 4.07085500  | -1.26364000 |
| H  | -2.60459500 | 4.59414700  | -2.10224000 |
| H  | -2.92958000 | 3.79803700  | -0.56455800 |
| H  | -1.46272800 | 4.78298400  | -0.77449500 |
| H  | 0.08765600  | -0.98936200 | -2.21640600 |
| H  | 1.67238000  | 0.56267200  | -1.59337500 |
| C  | -2.20093100 | 1.23980200  | 3.17835100  |
| C  | -2.05182000 | 0.42347700  | 3.89241000  |
| H  | -3.70723800 | 1.36328800  | 2.90004000  |
| H  | -4.24144500 | 1.54793200  | 3.83665500  |
| H  | -3.92943800 | 2.19736600  | 2.22659500  |
| H  | -4.10898500 | 0.45090000  | 2.45364100  |
| H  | -1.63849400 | 2.52140800  | 3.81320000  |
| H  | -2.16548100 | 2.73786200  | 4.74672400  |
| H  | -0.57196200 | 2.42226800  | 4.04063700  |
| H  | -1.76363100 | 3.39629200  | 3.16463000  |
| H  | -0.31952000 | 0.86175300  | 2.22656300  |
| C  | -3.15960300 | -2.35902400 | -0.78340800 |
| C  | -4.22680700 | -1.34742300 | -0.32543500 |
| H  | -4.66140000 | -1.61503500 | 0.64280400  |
| H  | -3.80987100 | -0.33885000 | -0.24493800 |
| H  | -5.04350500 | -1.31256400 | -1.05303700 |
| C  | -3.76816100 | -3.77547900 | -0.84805000 |
| H  | -4.59456900 | -3.78951600 | -1.56531900 |
| H  | -3.02517400 | -4.51050900 | -1.17760000 |
| H  | -4.16921900 | -4.10684000 | 0.11465100  |
| H  | -1.24773500 | -3.14708400 | -0.17088500 |
| C  | -2.67352400 | -1.97789700 | -2.19096300 |
| H  | -2.34087300 | -0.94211900 | -2.21787600 |
| H  | -1.84803900 | -2.61996700 | -2.51901900 |
| H  | -3.49040800 | -2.08427300 | -2.91159700 |
| H  | -0.33705600 | -0.17715700 | -2.27153000 |
| C  | 3.57476100  | -0.37560000 | 0.67098100  |
| C  | 3.79163400  | 0.97700500  | 0.40164300  |
| C  | 4.66732100  | -1.17840400 | 1.03816900  |
| C  | 5.07346600  | 1.52482500  | 0.49708100  |
| H  | 2.95973000  | 1.59871700  | 0.09928300  |
| C  | 5.94696000  | -0.63274800 | 1.13085000  |
| H  | 4.51953400  | -2.23533200 | 1.24016400  |
| C  | 6.15516400  | 0.72290800  | 0.86150500  |
| H  | 5.22173500  | 2.57892900  | 0.28216000  |
| H  | 6.78162600  | -1.26871000 | 1.41024900  |
| C  | 1.34764100  | -3.25250900 | -0.41688800 |
| H  | 2.15647600  | -3.96383300 | -0.19917900 |
| H  | 0.63410400  | -3.31960700 | 0.40073800  |
| H  | 0.85577800  | -3.58391900 | -1.33493500 |
| C  | 1.76414200  | -1.57599800 | 1.96674300  |
| H  | 0.72519900  | -1.90055000 | 1.95875000  |
| H  | 2.38389600  | -2.42967300 | 2.25631400  |
| H  | 1.88271500  | -0.79693100 | 2.72297500  |
| C  | 2.97634100  | -1.865382   |             |

|    |             |             |             |    |             |             |             |
|----|-------------|-------------|-------------|----|-------------|-------------|-------------|
| Ir | 0.02512800  | -1.24766900 | 0.44449000  | H  | -6.08301200 | -0.03058200 | -1.62795500 |
| H  | 0.89500200  | -1.21671900 | -1.00603000 | H  | -5.16899400 | -0.74629100 | -0.29772900 |
| C  | 2.14181300  | -1.79962400 | 0.90542900  | H  | -4.90218200 | 0.94541100  | -0.74468100 |
| C  | 2.17851300  | -1.62557600 | -0.55494000 | C  | -4.35450100 | -1.84920000 | -2.77290600 |
| C  | 1.24406800  | 3.08644700  | 0.72657600  | H  | -5.31345200 | -1.80087300 | -3.29653500 |
| H  | 2.23480000  | 2.93126400  | 0.28932500  | H  | -3.58913600 | -2.15622800 | -3.49329800 |
| H  | 1.16795900  | 4.06965300  | 1.18924300  | H  | -4.44391300 | -2.64024200 | -2.01900600 |
| C  | -0.24215100 | 1.82525300  | -0.37539400 | H  | -1.92950400 | -0.80800400 | -2.37292300 |
| O  | 0.27924500  | 3.05958000  | -0.36979000 | C  | -1.96366100 | 3.17172700  | 1.10710200  |
| C  | 0.79268800  | 1.91292300  | 1.60724500  | C  | -3.40651800 | 2.63919700  | 1.18220900  |
| C  | -1.14133200 | 1.50054600  | -1.55749700 | H  | -4.02538000 | 3.00291700  | 0.35620500  |
| N  | -2.25435400 | 0.64488000  | -1.12911900 | H  | -3.42654300 | 1.54537700  | 1.17220400  |
| H  | -3.06725200 | 0.78543000  | -1.71936100 | H  | -3.87569200 | 2.97112600  | 2.11343400  |
| C  | -1.88327400 | -1.89129200 | -2.37553400 | C  | -1.97054600 | 4.71244400  | 1.16600100  |
| H  | -1.72961700 | -2.95747800 | -2.19335200 | H  | -2.38545100 | 5.04498500  | 2.12276800  |
| H  | -2.77868800 | -1.74315800 | -2.98327700 | H  | -0.95524700 | 5.11616900  | 1.08158900  |
| H  | -1.01334500 | -1.51076300 | -2.91658800 | H  | -2.58007200 | 5.15934800  | 0.37466000  |
| C  | -3.57782900 | -1.53482300 | 0.04064400  | H  | -0.24606700 | 3.13901500  | -0.22075200 |
| C  | -3.45565800 | -3.02947700 | 0.39725700  | C  | -1.17253500 | 2.64115000  | 2.31172000  |
| H  | -2.60662800 | -3.21660500 | 1.06145800  | H  | -1.04707700 | 1.55820000  | 2.25526600  |
| H  | -4.36686900 | -3.34994300 | 0.91339100  | H  | -0.18541900 | 3.11132100  | 2.36219500  |
| C  | -3.34210600 | -3.65756700 | -0.49162200 | H  | -1.69288200 | 2.87838900  | 3.24509900  |
| C  | -3.79351100 | -0.70412900 | 1.31960900  | H  | 0.24707300  | -0.55645000 | -1.79934500 |
| H  | -4.74369200 | -0.99648200 | 1.77994600  | C  | 2.30188700  | 2.31840700  | 0.09952100  |
| H  | -3.00741200 | -0.88056800 | 2.05891600  | H  | 1.41004400  | 2.63997100  | 0.63411900  |
| H  | -3.83039500 | 0.36688500  | 1.10420100  | H  | 3.15628400  | 2.85968000  | 0.52605000  |
| C  | -4.77377300 | -1.31929600 | -0.90990300 | C  | 2.20366700  | 2.62380300  | -0.94484600 |
| H  | -5.68872400 | -1.64609900 | -0.40451800 | C  | 3.20190900  | -1.04095800 | 1.85399800  |
| H  | -4.91385000 | -0.26507200 | -1.16996000 | H  | 3.41706000  | -1.67143200 | 0.99276700  |
| H  | -4.68674700 | -1.90044700 | -1.83151300 | H  | 4.15067100  | -0.66771100 | 2.25181100  |
| H  | -0.13738000 | -1.43603200 | 2.10731700  | H  | 2.72832000  | -1.64443000 | 2.63179700  |
| H  | -0.15258100 | -2.79915900 | 0.27987400  | C  | 3.76973800  | 0.41819600  | -0.59465800 |
| C  | -1.67162600 | 2.77384300  | -2.27188800 | C  | 3.76872500  | -0.20439900 | -1.84852500 |
| H  | -0.78721600 | 3.38336800  | -2.48077900 | C  | 5.01317500  | 0.78429000  | -0.04571600 |
| C  | -2.62894500 | 3.59610900  | -1.39721200 | C  | 4.96365400  | -0.46682500 | -2.52536800 |
| H  | -2.93983800 | 4.49711600  | -1.93409500 | H  | 2.83050900  | -0.49976300 | -2.30168500 |
| H  | -3.53222700 | 3.03168800  | -1.14497600 | C  | 6.20799100  | 0.51948200  | -0.71318300 |
| H  | -2.15070400 | 3.90561800  | -0.46521800 | H  | 5.04475300  | 1.28496600  | 0.91840500  |
| C  | -2.30964600 | 2.40942000  | -3.62186700 | C  | 6.18801300  | -0.11114100 | -1.96008000 |
| H  | -2.55987900 | 3.32157400  | -4.17080300 | H  | 4.93163900  | -0.95338600 | -3.49602600 |
| H  | -1.62932500 | 1.81575200  | -4.24147600 | H  | 7.15249700  | 0.80769500  | -0.26083800 |
| H  | -3.24153900 | 1.84334800  | -3.50708800 | H  | 7.11589200  | -0.31322000 | -2.48443500 |
| H  | -0.49892800 | 0.98914900  | -2.29828500 | C  | 2.03159300  | 2.10155200  | 2.72231100  |
| C  | -0.11767900 | 2.30882900  | 2.80986900  | H  | 1.27366700  | 1.76918100  | 2.54307300  |
| C  | -1.32945500 | 3.14775000  | 2.36438300  | H  | 1.71544000  | 0.39581900  | 3.56505700  |
| H  | -1.03272400 | 4.09035400  | 1.89388800  | H  | 2.96083300  | 1.52378900  | 3.00434600  |
| H  | -1.95635000 | 2.59265300  | 1.65962500  |    |             |             |             |
| H  | -1.94828600 | 3.39513300  | 3.23254400  |    |             |             |             |
| C  | 0.74632200  | 3.11351500  | 3.80243300  |    |             |             |             |
| O  | 0.15069600  | 3.38456700  | 4.67959700  |    |             |             |             |
| H  | 1.60331800  | 2.52427200  | 4.14757600  |    |             |             |             |
| H  | 1.12742100  | 4.04290100  | 3.36767200  |    |             |             |             |
| H  | 1.64728500  | 1.37268700  | 2.00321900  |    |             |             |             |
| C  | -0.62931400 | 1.04295500  | 3.51861200  |    |             |             |             |
| H  | -1.34661300 | 0.51136400  | 2.89198700  |    |             |             |             |
| H  | 0.19072100  | 0.36031000  | 3.76906600  |    |             |             |             |
| H  | -1.13629300 | 1.31427000  | 4.44997600  |    |             |             |             |
| C  | 2.26698300  | -3.22018300 | 1.47488700  |    |             |             |             |
| H  | 1.64822100  | -3.94872900 | 0.96703800  |    |             |             |             |
| C  | 3.31418100  | -3.53831100 | 1.41155200  |    |             |             |             |
| H  | 1.98407000  | -3.20869800 | 2.53086600  |    |             |             |             |
| C  | 2.27366500  | -2.86680000 | -1.44977600 |    |             |             |             |
| H  | 3.29167100  | -3.26322100 | -1.37741600 |    |             |             |             |
| H  | 1.57075800  | -3.64367100 | -1.15288500 |    |             |             |             |
| C  | 2.08428900  | -2.59991200 | -2.49197900 |    |             |             |             |
| C  | 2.99715500  | -0.47735300 | -1.11767100 |    |             |             |             |
| C  | 2.44855100  | 0.56400600  | -1.86752800 |    |             |             |             |
| C  | 4.38865000  | -0.51732500 | -0.93684800 |    |             |             |             |
| C  | 3.25557600  | 1.57621000  | -2.39103000 |    |             |             |             |
| H  | 1.38269400  | 0.57784600  | -2.04868200 |    |             |             |             |
| C  | 5.19980500  | 0.48658400  | -1.46464700 |    |             |             |             |
| C  | 4.83648600  | -1.33210900 | -0.37600100 |    |             |             |             |
| C  | 4.63523200  | 1.54393900  | -2.18413000 |    |             |             |             |
| C  | 2.80305700  | 2.38304900  | -2.95943500 |    |             |             |             |
| H  | 6.27364900  | 0.44444200  | -1.30987400 |    |             |             |             |
| H  | -1.00219400 | -1.34380600 | 1.77425700  |    |             |             |             |
| H  | 5.26708600  | 2.32996500  | -2.58591700 |    |             |             |             |
| C  | 2.90347400  | -0.81081400 | 1.77809400  |    |             |             |             |
| H  | 3.93872300  | -1.15166200 | 1.91103400  |    |             |             |             |
| H  | 2.95020900  | 0.18605400  | 1.34572600  |    |             |             |             |
| H  | 2.45160700  | -0.74966200 | 2.77138900  |    |             |             |             |
|    |             |             |             | N  | -0.05377400 | 1.19414300  | 0.05633200  |
|    |             |             |             | P  | -2.21508200 | -1.18208200 | -0.17835100 |
|    |             |             |             | Ir | 0.10625200  | -1.13415600 | -0.62011500 |
|    |             |             |             | H  | 0.53782200  | -0.65547000 | -2.13052400 |
|    |             |             |             | C  | 1.78614000  | -2.05029100 | 0.82896600  |
|    |             |             |             | C  | 2.26034900  | -1.58757400 | -0.50726900 |
|    |             |             |             | C  | 0.82330700  | 3.28417900  | -0.53826700 |
|    |             |             |             | H  | 1.48337500  | 3.11957200  | -1.39386900 |
|    |             |             |             | H  | 0.92155800  | 4.30846900  | -0.18605900 |
|    |             |             |             | C  | -0.89514800 | 1.85890300  | -0.66791300 |
|    |             |             |             | O  | -0.55483100 | 3.11146400  | -1.00117900 |
|    |             |             |             | C  | 0.95927500  | 2.19483200  | 0.53449200  |
|    |             |             |             | C  | -2.22773800 | 1.37303300  | -1.21449500 |
|    |             |             |             | N  | -2.82786700 | 0.40506300  | -0.28593100 |
|    |             |             |             | H  | -3.84023900 | 0.45339000  | -0.29678400 |
|    |             |             |             | C  | -3.11528200 | -2.19339700 | -1.42283100 |
|    |             |             |             | H  | -2.72688300 | -3.21442100 | -1.41560200 |
|    |             |             |             | H  | -4.19288700 | -2.20901000 | -1.24457200 |
|    |             |             |             | H  | -2.92095100 | -1.75901300 | -2.40675400 |
|    |             |             |             | C  | -2.79314400 | -1.79334900 | 1.49406000  |
|    |             |             |             | C  | -2.44146700 | -3.29069500 | 1.59596400  |
|    |             |             |             | H  | -1.37718400 | -3.46903200 | 1.40943400  |
|    |             |             |             | H  | -2.66807800 | -3.64333500 | 2.60755800  |
|    |             |             |             | H  | -3.02081200 | -3.89956100 | 0.89602700  |
|    |             |             |             | C  | -2.04852000 | -1.00499000 | 2.58384600  |
|    |             |             |             | H  | -2.39656000 | -1.33023400 | 3.57003600  |
|    |             |             |             | H  | -0.97059500 | -1.18159000 | 2.53532200  |
|    |             |             |             | H  | -2.22494500 | 0.06981900  | 2.49288700  |
|    |             |             |             | C  | -4.31239400 | -1.58723300 | 1.65898700  |
|    |             |             |             | H  | -4.62076800 | -1.98694900 | 2.63094800  |
|    |             |             |             | H  | -4.58226300 | -0.52655800 | 1.64583300  |
|    |             |             |             | H  | -4.89429100 | -2.10882900 | 0.89383800  |
|    |             |             |             | H  | 0.49845600  | -1.76064700 | 0.93937500  |
|    |             |             |             | H  | 0.00217800  | -2.58793600 | -1.17138200 |
|    |             |             |             | C  | -3.21638600 | 2.52787900  | -1.53295600 |
|    |             |             |             | C  | -2.66202800 | 3.21542000  | -2.17925800 |
|    |             |             |             | C  | -3.67497500 | 3.30249300  | -0.29024200 |
|    |             |             |             | H  | -4.36939800 | 4.09513500  | -0.58396300 |
|    |             |             |             | H  | -4.19440000 | 2.65539500  | 0.42399800  |
|    |             |             |             | C  | -2.83192600 | 3.76763900  | 0.22325000  |
|    |             |             |             | C  | -4.41416700 | 1.99876200  | -2.33855600 |
|    |             |             |             | H  | -5.03242000 | 2.83582600  | -2.67496600 |
|    |             |             |             | H  | -4.09058400 | 1.43851600  | -3.22209400 |
|    |             |             |             | H  | -5.06206600 | 1.34455600  | -1.74307000 |
|    |             |             |             | H  | -1.99466500 | 0.91456900  | -2.18929700 |
|    |             |             |             | C  | 0.67636100  | 2.71892800  | 1.98324000  |
|    |             |             |             | C  | -0.70237100 | 3.39597100  | 2.08900600  |
|    |             |             |             | H  | -0.80687900 | 4.24050800  | 1.40175100  |
|    |             |             |             | H  | -1.50851000 | 2.68421900  | 1.88758600  |
|    |             |             |             | H  | -0.84733000 | 3.77994800  | 3.10341100  |
|    |             |             |             | C  | 1.78327500  | 3.73175800  | 2.34477900  |
|    |             |             |             | H  | 1.67853800  | 4.03413300  | 3.39155900  |
|    |             |             |             | H  | 2.77827800  | 3.28949500  | 2.22072000  |
|    |             |             |             | H  | 1.73811300  | 4.64186400  | 1.73900100  |
|    |             |             |             | H  | 1.94836100  | 1.73915400  | 0.50910100  |
|    |             |             |             | C  | 0.73239300  | 1.56769700  | 2.99938300  |
|    |             |             |             | H  | 0.10283500  | 0.73324400  | 2.68979000  |
|    |             |             |             | H  | 1.75401700  | 1.20508000  | 3.13099700  |
|    |             |             |             | H  | 0.38287400  | 1.91488700  | 3.97704400  |
|    |             |             |             | C  | 2.24651300  | -1.30456100 | 2.07926000  |
|    |             |             |             | H  | 2.39971500  | -0.24815700 | 1.88511300  |
|    |             |             |             | H  | 1.52655400  | -1.41895900 | 2.89285600  |
|    |             |             |             | C  | 3.19546200  | -1.73416100 | 2.41304300  |
|    |             |             |             | C  | 2.69863600  | -2.66018900 | -1.51365100 |
|    |             |             |             | H  | 3.68589200  | -3.04900300 | -1.23078500 |
|    |             |             |             | H  | 2.00684600  | -3.49952900 | -1.58580000 |
|    |             |             |             | H  | 2.79044700  | -2.21415000 | -2.50651500 |
|    |             |             |             | H  | -0.48741800 | -0.63214800 | -2.07222700 |
|    |             |             |             | C  | 1.70174500  | -3.55797300 | 1.08333900  |
|    |             |             |             | H  | 1.17288000  | -4.09086600 | 0.29488400  |
|    |             |             |             | H  | 2.72052600  | -3.95348600 | 1.1         |

C 3.22772300 -0.42250200 -0.60416000  
C 3.03201600 0.63702400 -1.50229800  
C 4.44876000 -0.46739300 0.09172200  
C 3.99024700 1.63946300 -1.66498600  
C 2.10508200 0.69101200 -2.06342100  
H 5.40460500 0.53872500 -0.05544000  
H 4.66126000 -1.30408300 0.74898900  
C 5.17648000 1.60283300 -0.93048300  
H 3.80432400 2.45104900 -2.36282300  
H 6.33166000 0.48375100 0.50767800  
H 5.91862900 2.38676500 -1.04662700

**O**

N -0.22689100 1.05059700 0.12730300  
P 2.32651000 -0.88477900 -0.21500100  
I<sub>r</sub> -0.00616900 -1.19429400 -0.28953900  
H 0.09591800 -1.45371200 1.39479400  
C -1.98438300 -1.84438600 0.51358000  
C -1.15463200 -1.74917000 1.74558000  
C -1.33830600 2.92064700 1.01081400  
H -2.02954000 2.61189700 1.79968500  
C -1.49083300 3.97430400 0.78574800  
C 0.50664500 1.64511400 1.00737300  
O 0.01901800 2.77690200 1.53173200  
C -1.35113000 1.97941500 -0.20507500  
C 1.85405200 1.18671100 1.54102600  
N 2.67188500 0.65204000 0.44123600  
H 3.65949500 0.75349900 0.62361800  
C 3.11993800 -2.12872900 0.88532400  
H 2.89947900 -3.13423800 0.52038000  
H 4.20093600 -1.98937200 0.95761200  
H 2.67775000 -2.02051500 1.87924800  
C 3.31006600 -0.90014200 -1.81037700  
C 3.21302200 -2.31491800 -2.41423000  
H 2.17161300 -2.62059100 -2.55894500  
H 3.70514700 -2.32006400 -3.39245300  
H 3.70971600 -3.06396600 -1.79045600  
C 2.70495000 0.13003300 -2.78109900  
C 3.33486200 0.19395300 -3.67463100  
H 1.70418200 -0.16193400 -3.10960300  
H 2.64605500 1.12431900 -2.33012800  
C 4.78534200 -0.53562500 -1.54195000  
H 5.34214400 -0.60674500 -2.48211400  
H 4.89265300 0.49252300 -1.18201000  
H 5.26509100 -1.21197500 -0.82931300  
H -0.77110600 -1.16323600 -1.75548700  
H 0.24284200 -2.72692800 -0.53432900  
C 2.61309300 2.31484200 2.28867500  
H 1.89866400 2.72145900 3.01105300  
C 3.05686500 3.45385900 1.35796000  
H 3.51337100 4.25531300 1.94620700  
H 3.79996000 3.11588100 0.62850600  
H 2.21106500 3.87542800 0.80956600  
C 3.79590000 1.74029400 3.08363800  
H 4.25047400 2.52686300 3.69251800  
H 3.47671900 0.93511700 3.75363800  
H 4.58571400 1.34498300 2.43405500  
H 1.62708800 0.41188500 2.29199400  
C -1.15534500 2.70302100 -1.57325000  
C 0.09706200 3.59980700 -1.56772400  
H 0.03566900 4.40039900 -0.82424500  
H 1.00065200 3.01455000 -1.36815100  
H 0.21906800 4.07275700 -2.54708100  
C -2.41913400 3.54818300 -1.83411700  
H -2.34068300 4.04638400 -2.80549900  
H -3.31463400 2.91715900 -1.84703700  
H -2.56560200 4.32781700 -1.07969200  
H -2.27499700 1.40769100 -0.24397500  
C -1.01559500 1.67221000 -2.70605000  
H -0.08511700 1.11210900 -2.61079100  
H -1.85126300 0.96742200 -2.70947000  
H -1.00021900 2.18301600 -3.67419100  
C 0.18655600 -0.96527800 -1.91215900  
H -1.34544600 -0.60364200 2.74417500  
H -1.66222100 0.31999200 2.26796700  
H -2.10124100 -0.89500400 3.47843900  
H -0.41860700 -0.42099700 3.29464100  
C -2.37379200 -3.25449700 0.04865100  
H -1.54639400 -3.96282900 0.07080500  
H -3.17997400 -3.64175400 0.68643100  
H -2.75189000 -3.21962200 -0.97461100  
C -3.15003700 -0.91074400 0.25643400  
C -3.49401500 -0.58653800 -1.06904300  
C -4.01182100 -0.46174800 1.26942300  
C -4.59798700 0.20766900 -1.36825700  
H -2.86730700 -0.94952000 -1.87690300  
C -5.11288400 0.35057600 0.97824100  
C -3.84533300 -0.75366300 2.29791300  
C -5.40480700 0.70199200 -0.33861100  
H -4.81946500 0.45055300 -2.40325800  
H -5.74713200 0.69686400 1.78904500  
H -6.25588200 1.33722300 -0.56382000  
C -0.80381900 -3.05299700 2.47161700  
H -0.38083100 -3.80239500 1.80508300  
H -0.08598100 -2.86046300 3.27314500  
H -1.71917800 -3.45530400 2.91775400

**P**

N 0.92378600 1.29671800 0.07485700  
P 1.10385600 -1.91328200 -0.17750700  
I<sub>r</sub> -0.64728800 -0.34672800 -0.18590900  
H -0.65508500 -0.66634000 1.44852600  
C -2.38894100 0.75353200 0.67937100  
C -1.83113300 0.06125000 1.85099100  
H 1.74712700 3.38520100 0.73949000  
H 1.09425600 3.78948900 1.51884500  
H 2.46734400 4.14190800 0.43597000  
C 1.88375900 1.15844300 0.92699800  
O 2.49910400 2.27794500 1.32673800  
C 0.97419300 2.71396400 -0.40774300  
C 2.37364900 -0.15102000 1.52113900  
N 2.50225500 -1.15215600 0.44546400  
H 3.25986500 -1.79820800 0.63842700  
C 0.70254500 -3.30288400 0.96286000  
H -0.24934400 -3.75059400 0.67009400  
H 1.48145000 -4.06872500 0.98153700  
H 0.58933700 -2.88318200 1.96571700  
C 1.69575200 -2.72191200 -1.76060100

C 0.57571200 -3.66135700 -2.25125400  
H -0.37745300 -3.13164000 -2.35477000  
H 0.84834500 -4.05852300 -3.23466100  
H 0.42822700 -4.51232500 -1.58014500  
C 1.96779500 -1.63699200 -2.81585900  
H 2.41092400 -2.10162200 -3.70305600  
H 1.04528400 -1.14411500 -3.13373900  
H 2.66243500 -0.87765500 -2.44672700  
C 2.99265800 -3.51864100 -1.50958400  
H 3.26804400 -4.04334000 -2.43050300  
H 3.82777500 -2.86022700 -1.25126800  
H 2.88274400 -4.27480700 -0.72734500  
H -1.12870700 0.33441100 -1.64922000  
H -1.66337400 -1.52975800 -0.38171100  
C 3.70476900 -0.00244300 2.30143400  
H 3.55381200 0.84155900 2.98226400  
C 4.90266400 0.32113700 1.39481000  
H 5.79144300 0.49860600 2.00745700  
H 5.13317200 -0.50564400 0.71494000  
H 4.72100800 1.21447000 0.79306700  
C 3.96917200 -1.24988900 3.15877300  
H 4.85363600 -1.09223800 3.78237000  
H 3.12350300 -1.47137700 3.81812600  
H 4.16277300 -2.13965900 2.54851700  
H 1.60805100 -0.44435400 2.25748700  
C 1.64637500 2.87105100 -1.80647000  
C 3.10906200 2.38841300 -1.79301700  
H 3.73474500 2.97915600 -1.11641900  
H 3.17787900 1.33798600 -1.49252600  
H 3.53854300 2.47507700 -2.79585900  
C 1.58459700 4.36392900 -2.19149400  
H 2.01954500 4.50710300 -3.18543800  
H 0.54899800 4.72050400 -2.22415800  
H 2.14080200 5.00268900 -1.49854600  
H -0.04017900 3.10132000 -0.48231700  
C 0.86307100 2.06824300 -2.85751300  
H 0.98495300 0.99865600 -2.69578800  
H -0.20622300 2.30763000 -2.83248900  
H 1.23675500 2.29851500 -3.86019300  
C -2.56189400 -1.15500300 2.41570000  
H -3.35287700 -0.80308800 3.08511700  
H -3.01567900 -1.75506700 1.62845200  
H -1.88172700 -1.78131400 2.99822100  
H -0.48795400 -0.31380900 -1.85964900  
C -2.28414700 2.27799000 0.63437400  
H -3.06976900 2.72567300 1.25636300  
H -1.33033000 2.65382500 0.99844000  
H -2.43114900 2.63398500 -0.38795700  
C -3.76764300 0.32890700 0.20028500  
C -4.04430200 -0.16519100 -1.08023300  
C -4.85320700 0.54801600 1.06825800  
C -5.35405000 -0.45336700 -1.47449700  
H -3.23006100 -0.33774900 -1.77309100  
C -6.16068200 0.25432000 0.68332900  
H -4.67092400 0.95599800 2.05894200  
C -6.41699200 -0.25166500 -0.59364400  
H -5.53866300 -0.83905900 -2.47307900  
H -6.97766900 0.42448200 1.37860200  
H -7.43367300 -0.48123800 -0.89856800  
C -1.13307300 0.87970800 2.93319000  
H -0.63540500 0.22685000 3.65467700  
H -0.39855800 1.57386300 2.52862400  
H -1.89364500 1.46121000 3.46531300

# Ir/1b with S3

## TSSs for the $\sigma$ -methathesis pathway

### A

|    |             |             |             |
|----|-------------|-------------|-------------|
| N  | -0.95699300 | 1.51922300  | 0.16144900  |
| P  | -1.33853200 | -1.42485300 | -1.03037700 |
| Ir | 0.46425900  | -0.21990600 | -0.18383600 |
| H  | 1.39255000  | -1.45108000 | -0.46927700 |
| C  | 0.62019400  | 0.15841700  | -1.76368500 |
| H  | 1.66200500  | 0.01658800  | 1.77122900  |
| C  | 2.42368200  | 0.78957800  | 0.82389700  |
| H  | 1.66323200  | 0.81213600  | -0.65019800 |
| H  | -0.20435800 | -1.02857400 | 1.05790900  |
| C  | -2.08991700 | 3.57566700  | 0.29922200  |
| H  | -2.62596500 | 4.25111000  | -0.36643500 |
| H  | -1.89376200 | 4.07315100  | 1.25249400  |
| C  | -2.17364100 | 1.35028300  | 0.55456800  |
| O  | -2.96006500 | 2.43393100  | 0.57448900  |
| C  | -0.82949500 | 2.92893800  | -0.30708200 |
| C  | -2.79347000 | -0.00293400 | 0.86890400  |
| N  | -2.78000200 | -0.81823500 | -0.35562000 |
| C  | -3.51192000 | -0.57688500 | -1.01451400 |
| H  | -1.60876400 | -1.27746500 | -2.83349300 |
| H  | -0.81661300 | -1.81852300 | -3.35452100 |
| H  | -2.57850300 | -1.69027700 | -3.12105000 |
| H  | -1.55438000 | -0.22605300 | -3.11313200 |
| C  | -1.32531400 | -3.27177700 | -0.66745500 |
| H  | -0.08408900 | -3.92038800 | -1.30649600 |
| H  | 0.84182700  | -3.49773300 | -0.90766300 |
| H  | -0.09153400 | -4.99221400 | -1.08124500 |
| H  | -0.07323800 | -3.81583500 | -2.39571600 |
| C  | -1.30164000 | -3.48621200 | 0.85618600  |
| H  | -1.37196100 | -4.55899900 | 1.06453700  |
| H  | -0.37398900 | -3.11751000 | 1.30075100  |
| H  | -2.14761100 | -2.99585300 | 1.34676200  |
| C  | -2.61320200 | -3.89232200 | -1.24922200 |
| H  | -2.65227700 | -4.94969900 | -0.96802100 |
| H  | -3.50820200 | -3.40485200 | -0.85172000 |
| C  | -2.64045600 | -3.84506900 | -2.34143100 |
| C  | 0.85781400  | 0.73167200  | 2.84730700  |
| H  | 0.19570500  | 0.02331400  | 3.34950300  |
| H  | 1.54621500  | 1.14339300  | 3.59702900  |
| C  | 0.24421700  | 1.54392800  | 2.46096900  |
| C  | 2.45175900  | 2.31045300  | 0.94262900  |
| H  | 1.49589800  | 2.72001000  | 1.25695600  |
| C  | 3.19289100  | 2.57699000  | 1.70354000  |
| H  | 2.75242700  | -2.77819800 | 0.00295600  |
| C  | 3.76039800  | 0.24109100  | 0.34097700  |
| C  | 4.00550700  | -0.25582800 | -0.94298600 |
| C  | 4.82559700  | 0.30566100  | 1.25535800  |
| C  | 5.28417400  | -0.68985800 | -1.30339100 |
| C  | 3.19536000  | -0.31689500 | -1.65968800 |
| C  | 6.10020300  | -0.12985900 | 0.89617800  |
| C  | 4.65533500  | 0.69258500  | 2.25621500  |
| C  | 6.33432300  | -0.63100100 | -0.38703300 |
| H  | 5.45394100  | -1.07505600 | -2.30444100 |
| H  | 6.90849100  | -0.07822400 | 1.61945100  |
| C  | -4.19924100 | 0.07694200  | 1.50058400  |
| H  | -4.83463100 | 0.67709600  | 0.83635900  |
| C  | -4.81320700 | -1.32233700 | 1.64597500  |
| H  | -4.18623100 | -1.95463400 | 2.28549500  |
| H  | -5.79921400 | -1.24894900 | 2.11438500  |
| H  | -4.92756700 | -1.82685700 | 0.68427000  |
| C  | -4.12673400 | 0.76792600  | 2.87253800  |
| H  | -3.71831200 | 1.77853100  | 2.80689200  |
| H  | -5.12685300 | 0.83829200  | 3.30978000  |
| H  | -3.50239900 | 0.18599900  | 3.56103400  |
| H  | -2.13083900 | -0.48590000 | 1.59315400  |
| C  | -0.72224500 | 3.01088000  | -1.84490500 |
| H  | 0.06910200  | 3.37034600  | 0.12259600  |
| C  | 2.21233900  | -1.32324700 | 2.23988100  |
| C  | 2.71001600  | -1.87407500 | 1.44293900  |
| H  | 2.94490800  | -1.14238600 | 3.03698800  |
| H  | 1.41367200  | -1.94335400 | 2.65043300  |
| C  | 7.32634800  | -0.97112100 | -0.66831500 |
| C  | -1.99291000 | 2.53142800  | -2.55912900 |
| H  | -1.81195300 | 2.44077200  | -3.63436100 |
| H  | -2.32251300 | 1.55617400  | -2.19197600 |
| H  | -2.82285400 | 3.23395000  | -2.42709200 |
| C  | -0.34538100 | 4.43561000  | -2.27465600 |
| H  | -0.22480000 | 4.48620000  | -3.36088800 |
| H  | -1.12192900 | 5.15813200  | -1.99726500 |
| H  | 0.59469200  | 4.75698800  | -1.81384200 |
| H  | 0.10005200  | 2.34119400  | -2.12007400 |

### B

|    |             |             |             |
|----|-------------|-------------|-------------|
| N  | 0.24258100  | 1.20270200  | 0.19692500  |
| P  | -2.19607500 | -0.47920300 | -0.91631900 |
| Ir | -0.02008900 | -0.97875500 | -0.28157900 |
| H  | -0.29222900 | -2.49466200 | -0.60038000 |
| H  | 0.22487300  | -0.69679800 | -1.87407100 |
| C  | 1.26002200  | -1.64458500 | 1.50063000  |
| C  | 2.18842200  | -1.76942800 | 0.39409800  |
| H  | 1.48280900  | -1.22970800 | -0.92288600 |
| H  | -0.94374900 | -1.12686700 | 1.04909800  |
| C  | 1.10614600  | 3.31125700  | 0.77533400  |
| H  | 1.23785200  | 4.27597400  | 0.28659500  |
| H  | 1.66329000  | 3.29416700  | 1.71520500  |
| C  | -0.65249000 | 1.91581200  | 0.78780000  |
| O  | -0.31222500 | 3.17132400  | 1.10474800  |
| C  | 1.39519000  | 2.08730700  | -0.11655600 |
| C  | 2.31737800  | 1.59185700  | 0.18936600  |
| C  | 1.47058700  | 2.37614000  | -1.63183100 |
| C  | -2.06122800 | 1.43909000  | 1.11360100  |
| N  | -2.72195200 | 0.90952300  | -0.08560200 |
| H  | -3.10427800 | 1.63263500  | -0.68302700 |
| C  | -2.39892600 | -0.00981600 | -2.67276200 |
| H  | -2.23130000 | -0.88839300 | -3.29828200 |
| H  | -3.39808900 | 0.38867000  | -2.86410200 |
| H  | -1.64593600 | 0.74085500  | -2.91527300 |
| C  | -3.47458000 | -1.81523400 | -0.58247800 |

|   |             |             |             |
|---|-------------|-------------|-------------|
| C | -3.13727700 | -3.07361400 | -1.40221800 |
| H | -2.14957300 | -3.46729500 | -1.14836200 |
| H | -3.87846700 | -3.84847700 | -1.17904800 |
| H | -3.17230700 | -2.88771500 | -2.48000900 |
| C | -3.46943200 | -2.14820300 | 0.92055600  |
| H | -4.26653400 | -2.87061200 | 1.12604000  |
| H | -2.52012700 | -2.59218800 | 1.22980700  |
| H | -3.65028000 | -1.26065000 | 1.53252500  |
| C | -4.86359200 | -1.27453200 | -0.98269000 |
| H | -5.62062900 | -2.01880500 | -0.71498300 |
| H | -5.10132900 | -0.34658200 | -0.45464500 |
| H | -4.94640200 | -1.09867000 | -2.05883600 |
| C | 3.39803700  | -0.86591800 | 0.25883300  |
| C | 3.78079600  | -0.33333400 | -0.98094600 |
| C | 4.26346100  | -0.71094500 | 1.35151700  |
| C | 4.97941800  | 0.36550300  | -1.11885900 |
| H | 3.13265200  | -0.45882700 | -1.84367100 |
| C | 5.46087800  | -0.00545300 | 1.21626900  |
| H | 4.01385500  | -1.15500500 | 2.30826700  |
| C | 5.82014600  | 0.54050900  | -0.01668000 |
| H | 5.25409300  | 0.77308600  | -2.08669600 |
| H | 6.11360700  | 0.10952600  | 2.07615200  |
| C | 0.72620300  | -2.91478900 | 2.15234800  |
| H | 0.34801900  | -3.64462200 | 1.43909900  |
| H | 1.53310200  | -3.38239000 | 2.73258100  |
| H | -0.08501500 | -2.66716400 | 2.83972700  |
| C | 2.49536000  | -3.16308500 | -0.15863300 |
| H | 2.97682500  | -3.09001800 | -1.13568000 |
| H | 3.19860700  | -3.64695800 | 0.52869500  |
| H | 1.60752700  | -3.78549700 | -0.25351000 |
| C | -2.94260300 | 2.49886200  | 1.81565600  |
| H | -1.92616800 | 0.60772500  | 1.81287700  |
| H | 6.75078000  | 1.08942900  | -0.12169500 |
| C | 1.39756300  | -0.51212300 | 2.51035100  |
| H | 2.03191200  | -0.84549000 | 3.34086500  |
| H | 1.83743700  | 0.39083900  | 2.09291800  |
| H | 0.42100100  | -0.26201100 | 2.92786300  |
| C | 0.21283500  | 3.06959600  | -2.17154500 |
| H | 0.10583000  | 4.08387600  | -1.77134000 |
| H | 0.26507700  | 3.15279900  | -3.26107900 |
| H | -0.69466500 | 2.51397200  | -1.92152500 |
| C | 2.73422400  | 3.18343700  | -1.96030300 |
| H | 2.83778100  | 3.30326000  | -3.04301200 |
| H | 2.69285400  | 4.18791200  | -1.52350600 |
| H | 3.63403300  | 2.68807600  | -1.58495900 |
| H | 1.55101900  | 1.39417100  | -2.11335400 |
| C | -3.35748300 | 3.65621700  | 0.89178000  |
| H | -3.84116100 | 4.44162200  | 1.47954800  |
| H | -2.50033900 | 4.09854900  | 0.37839900  |
| H | -4.08823600 | 3.33083300  | 0.14202200  |
| C | -4.17199800 | 1.82709200  | 2.44223800  |
| H | -4.78954100 | 1.35320000  | 1.67282800  |
| H | -3.88365100 | 1.05900300  | 3.16785400  |
| H | -4.78648300 | 2.56803300  | 2.96207600  |
| H | -2.32368600 | 2.91279300  | 2.61959100  |

### C

|    |             |             |             |
|----|-------------|-------------|-------------|
| Ir | 0.12521600  | -1.08851200 | -0.01311700 |
| H  | 0.61544400  | -2.53621100 | -0.35791800 |
| H  | 0.17816300  | -1.47717100 | 1.57006800  |
| H  | 0.68969500  | -0.61871100 | -1.48373400 |
| C  | -0.75913300 | -1.04403500 | -1.42271900 |
| H  | -2.03016400 | -1.70256100 | -0.90400700 |
| H  | -1.83453900 | -2.19202200 | 0.45046000  |
| C  | -4.89490300 | 1.43483900  | -1.72642300 |
| C  | -3.55128700 | 1.63104700  | -2.05167700 |
| C  | -2.61001800 | 0.63705800  | -1.77798500 |
| C  | -2.99429000 | -0.55901900 | -1.15886300 |
| C  | -4.35126900 | -0.76002500 | -0.86354100 |
| C  | -5.29332400 | 0.23128900  | -1.14008700 |
| C  | -2.01928500 | -2.70759200 | -2.06346100 |
| C  | -1.58760200 | -3.67772500 | 0.67551200  |
| H  | -3.23155300 | 2.55651800  | -2.52138200 |
| H  | -1.56803700 | 0.80301400  | -2.02753800 |
| H  | -4.67342200 | -1.69573100 | -0.41725200 |
| H  | -6.33763700 | 0.06139000  | -0.89648400 |
| H  | -1.97764900 | -2.18455000 | -3.02112000 |
| H  | -1.18017300 | -3.39991300 | -2.00677300 |
| H  | -2.95346900 | -3.27791100 | -2.02606200 |
| H  | -0.91524100 | -4.13015700 | -0.05051200 |
| H  | -1.16807100 | -3.83917800 | 1.67018700  |
| H  | -2.55171400 | -4.20235100 | 0.62510000  |
| P  | 2.31582000  | -0.51068500 | 0.53106900  |
| N  | 2.58316800  | 1.12945300  | 0.15180200  |
| C  | 2.70743000  | -0.60272900 | 2.31408200  |
| C  | 3.66017300  | -1.47382700 | -0.35775400 |
| C  | 1.68655300  | 1.89392400  | -0.72679400 |
| H  | 2.99380100  | 1.68503500  | 0.89383500  |
| H  | 2.72564700  | -1.64967000 | 2.62199100  |
| H  | 3.67389700  | -0.14210100 | 2.53098800  |
| C  | 3.55677700  | -2.96706700 | 0.00125200  |
| C  | 3.48115900  | -1.27973500 | -1.87450400 |
| C  | 5.03260200  | -0.91536300 | 0.07350100  |
| C  | 0.34485900  | 2.06727600  | -0.02605900 |
| H  | 1.49680500  | 1.28117400  | -1.61300500 |
| C  | 2.32542100  | 3.21567400  | -1.20779700 |
| H  | 2.59235700  | -3.38790100 | -0.29500900 |
| H  | 4.34256600  | -3.51293200 | -0.53182600 |
| H  | 3.70060800  | -3.14730800 | 1.07090700  |
| H  | 4.29531600  | -1.79308800 | -2.39691700 |
| H  | 2.53546500  | -1.69928400 | -2.22662300 |
| H  | 3.52268000  | -0.22198600 | -2.15239100 |
| H  | 5.81419900  | -1.41347400 | -0.50952500 |
| H  | 5.10620100  | 0.15971500  | -0.11423600 |
| H  | 5.24321100  | -1.10503500 | 1.12983000  |
| N  | -0.38650900 | 1.09516000  | 0.40165400  |
| O  | -0.07547000 | 3.30825500  | 0.25235500  |
| H  | 2.35201700  | 3.90946400  | -0.35795400 |
| C  | 1.47428300  | 3.83934100  | -2.32686800 |
| C  | 3.75928700  | 2.98414200  | -1.70557700 |
| C  | -1.46194400 | 1.68431500  | 1.24159100  |
| C  | -1.41184800 | 3.16557600  | 0.82975000  |
| H  | 0.44510500  | 4.02275500  | -2.01181900 |
| H  | 1.90557400  | 4.79550700  | -2.63711800 |
| H  | 1.45668100  | 3.18146800  | -3.20384200 |
| H  | 3.77319900  | 2.25288900  | -2.52212600 |
| H  | 4.17319600  | 3.92137000  | -2.08951600 |
| H  | 4.41990600  | 2.61746000  | -0.91723300 |
| H  | -2.41623100 | 1.24909900  | 0.94422600  |
| C  | -1.19726600 | 1.40333300  | 2.73702700  |

|   |             |             |             |
|---|-------------|-------------|-------------|
| H | -1.49952900 | 3.87622100  | 1.65069600  |
| H | -2.13371100 | 3.40670800  | 0.04546800  |
| H | 1.91768800  | -0.09059900 | 2.86409400  |
| H | -5.62654600 | 2.20915800  | -1.93554800 |
| C | -2.63164500 | -1.60078200 | 1.60165500  |
| H | -2.83249800 | -0.54094700 | 1.49024200  |
| H | -3.60083600 | -2.11189500 | 1.65848100  |
| H | -2.11533700 | -1.76861600 | 2.54721400  |
| C | 0.04760000  | 2.12434200  | 3.27393200  |
| H | 0.92703500  | 1.93914000  | 2.65089900  |
| H | -0.10012800 | 3.20806100  | 3.32996000  |
| H | 0.27630800  | 1.77467700  | 4.28500100  |
| H | -1.01257700 | 0.32579000  | 2.80679600  |
| C | -2.44021500 | 1.74245800  | 3.57032700  |
| H | -2.27158300 | 1.50520300  | 4.62496600  |
| H | -2.68222500 | 2.80995500  | 3.50774500  |
| H | -3.31655300 | 1.17934600  | 3.23226700  |

## D

|    |             |             |             |
|----|-------------|-------------|-------------|
| Ir | -0.45553900 | 0.03265600  | -0.41710000 |
| H  | -1.43269500 | 1.07678500  | -1.04692000 |
| H  | -0.19075600 | -0.55455900 | -1.91275900 |
| H  | -0.29389500 | 1.00468300  | 0.90362000  |
| H  | -1.34870600 | 0.02740700  | 0.99909000  |
| C  | -2.38797400 | -0.99664600 | 0.56276700  |
| C  | -2.18093900 | -1.41274400 | -0.81405400 |
| P  | 1.31346700  | 1.39310100  | -1.08448600 |
| N  | 2.60676400  | 1.22423000  | 0.01273100  |
| C  | 2.05058700  | 0.97267100  | -2.70371900 |
| C  | 0.92817600  | 3.23097000  | -1.15731400 |
| C  | 2.43584600  | 0.61724500  | 1.34168300  |
| H  | 3.51725700  | 1.05134700  | -0.39852300 |
| H  | 1.35424700  | 1.25772800  | -3.49430400 |
| H  | 3.00013800  | 1.49270500  | -2.85016600 |
| C  | -0.16904800 | 3.49452000  | -2.20469600 |
| C  | 0.45200600  | 3.69145900  | 0.23211900  |
| C  | 2.21868500  | -3.98890800 | -1.53352700 |
| C  | 2.15592700  | -0.86777000 | 1.15641000  |
| H  | 1.53879800  | 1.05126300  | 1.79144600  |
| C  | 3.62276200  | 0.92976900  | 2.27837600  |
| H  | -1.09231800 | 2.95920300  | -1.96751700 |
| H  | -0.39360800 | 4.56642300  | -2.21740800 |
| H  | 0.14414800  | 3.21423500  | -3.21497700 |
| H  | 0.28210900  | 4.77304700  | 0.20980500  |
| H  | -0.48618700 | 3.20891500  | 0.51663000  |
| H  | 1.20132000  | 3.48798000  | 1.00311700  |
| H  | 2.01933300  | 5.06485500  | -1.49523000 |
| H  | 3.02943100  | 3.77137900  | -0.83237000 |
| H  | 2.55624800  | 3.75606700  | -2.54731200 |
| N  | 1.14241100  | -1.35125300 | 0.51944900  |
| O  | 3.08483300  | -1.73779900 | 1.57317400  |
| H  | 4.50156100  | 0.38928000  | 1.90366300  |
| C  | 3.31828700  | 0.44741600  | 3.70649600  |
| C  | 3.92928800  | 2.43411500  | 2.28549500  |
| C  | 1.41292000  | -2.80116400 | 0.30692000  |
| C  | 2.54395300  | -3.06982600 | 1.31559400  |
| H  | 3.11410100  | -0.62442800 | 3.74740400  |
| H  | 4.17178700  | 0.65163200  | 4.35944400  |
| H  | 2.45219100  | 0.98205000  | 4.11438100  |
| H  | 3.05658500  | 3.00447000  | 2.62489600  |
| H  | 4.75198200  | 2.64187000  | 2.97617200  |
| H  | 4.20961400  | 2.80608000  | 1.29793300  |
| H  | 0.52966700  | -3.37833300 | 0.58238500  |
| C  | 1.76273600  | -3.08459100 | -1.17041800 |
| C  | 3.35425600  | -3.69482500 | 0.94226600  |
| H  | 2.17917900  | -3.46546400 | 2.26686300  |
| H  | 2.20384800  | -0.10480600 | -2.74795500 |
| C  | -2.07771100 | -1.97658700 | 1.69902100  |
| H  | -2.16461500 | -1.47379300 | 2.66423600  |
| H  | -2.79833200 | -2.79856600 | 1.67417000  |
| H  | -1.07510700 | -2.39270500 | 1.62185500  |
| C  | -1.79840200 | -2.85178500 | -1.10319800 |
| H  | -1.07672300 | -3.26814500 | -0.40846800 |
| H  | -2.70790900 | -3.46444100 | -1.03666900 |
| H  | -1.40293700 | -2.95011100 | -2.11522300 |
| C  | -3.60113500 | -0.12538300 | 0.84961600  |
| C  | -3.56858800 | 1.25898900  | 1.04113600  |
| C  | -4.83353400 | -0.79369700 | 0.93692800  |
| C  | -4.74389900 | 1.96449200  | 1.31334200  |
| H  | -2.62859400 | 1.79287300  | 0.96527800  |
| C  | -6.00548500 | -0.08888700 | 1.20796400  |
| H  | -4.87767600 | -1.86825100 | 0.78413000  |
| C  | -5.96482400 | 1.29510100  | 1.39746400  |
| H  | -4.69958100 | 3.03994900  | 1.45712300  |
| H  | -6.94992300 | -0.62140800 | 1.26766400  |
| C  | -3.10022400 | -0.85801300 | -1.89466500 |
| H  | -4.01918200 | -1.45829200 | -1.91715400 |
| H  | -3.37999300 | 0.18008300  | -1.72242700 |
| H  | -2.61974900 | -0.93408200 | -2.87147800 |
| H  | -6.87730800 | 1.84489600  | 1.60695200  |
| C  | 3.11575300  | -2.49084000 | -1.58909700 |
| H  | 3.20845400  | -1.43913500 | -1.30534900 |
| H  | 3.95461900  | -3.03215200 | -1.13912000 |
| H  | 3.23433900  | -2.55528600 | -2.67480800 |
| H  | 0.98100900  | -2.59042000 | -1.75763800 |
| C  | 1.70691700  | -4.59180300 | -1.45220600 |
| H  | 1.92655800  | -4.79303700 | -2.50485400 |
| H  | 2.44435800  | -5.13714900 | -0.85169000 |
| H  | 0.71778400  | -5.00451100 | -1.22750300 |

## E

|    |             |             |             |
|----|-------------|-------------|-------------|
| N  | -0.46243500 | 1.06355600  | 0.48320500  |
| P  | 2.28323900  | -0.57148300 | 0.53660200  |
| Ir | 0.03223600  | -1.13888300 | 0.41312800  |
| H  | 0.47856100  | -2.64154500 | 0.32171000  |
| H  | 0.26026200  | -1.17530200 | 2.03364500  |
| C  | -1.79069900 | -1.67791900 | -0.88255400 |
| C  | -2.19941200 | -2.13105600 | 0.44097400  |
| H  | -1.15913800 | -1.67595100 | 1.44770500  |
| H  | 0.50577900  | -0.93473500 | -1.13052200 |
| C  | -1.60427300 | 3.13417300  | 0.56494000  |
| H  | -1.68288800 | 3.88750500  | 1.34929600  |
| H  | -2.32303100 | 3.34622700  | -0.22836700 |
| O  | 0.24502900  | 2.00182700  | -0.04045800 |
| C  | -0.26944000 | 3.23755900  | -0.01656600 |
| C  | -1.68014800 | 1.67356000  | 1.06518500  |
| C  | 1.60376800  | 1.81711700  | -0.70112200 |

|   |             |             |             |
|---|-------------|-------------|-------------|
| N | 2.52359600  | 1.07149700  | 0.16403400  |
| H | 2.84305600  | 1.61876200  | 0.95529300  |
| C | 3.00274300  | -0.68818600 | 2.21446100  |
| H | 3.05196800  | -1.73753600 | 2.51130200  |
| H | 4.00408800  | -0.25328700 | 2.24222700  |
| H | 2.34561000  | -0.15864800 | 2.90625500  |
| C | 3.43703900  | -1.52786800 | -0.59943000 |
| C | 3.27059900  | -3.03876700 | -0.35897400 |
| H | 2.26908400  | -3.38005300 | -0.63149300 |
| H | 3.99469500  | -3.57538800 | -0.98135900 |
| H | 3.46003600  | -3.31968400 | 0.68204500  |
| C | 3.10999800  | -1.19120200 | -2.06580000 |
| H | 3.78461100  | -1.76017500 | -2.71421300 |
| H | 2.08464200  | -1.46292800 | -2.33020600 |
| H | 3.26372000  | -0.13001200 | -2.27974500 |
| C | 4.88729800  | -1.09445400 | -0.29526400 |
| H | 5.55098200  | -1.54333300 | -1.04124500 |
| H | 5.00310300  | -0.00797700 | -0.35231800 |
| H | 5.22427700  | -1.43514200 | 0.68746000  |
| C | -3.32462000 | -1.46242300 | 1.23379100  |
| H | -3.42785900 | -0.40022300 | 1.03872500  |
| H | -4.26612500 | -1.94959500 | 0.96092300  |
| H | -3.18198000 | -1.61325900 | 2.30639100  |
| C | 2.24438300  | 3.13967300  | -1.18644200 |
| H | 1.41149600  | 1.19939100  | -1.58489800 |
| C | -1.72435800 | 1.48281700  | 2.59426300  |
| H | -2.54496400 | 1.18738100  | 0.61257400  |
| C | -1.42546900 | -2.72650600 | -1.93512800 |
| H | -0.75468400 | -3.49836800 | -1.56193500 |
| H | -2.34631300 | -3.20420000 | -2.29456600 |
| H | -0.94338200 | -2.24202000 | -2.78509500 |
| C | -2.46319800 | -0.48580800 | -1.53073100 |
| C | -1.72776000 | 0.48846600  | -2.22410500 |
| C | -3.86457300 | -0.40482200 | -1.58128500 |
| C | -2.35875600 | 1.54892200  | -2.87140800 |
| H | -0.64797300 | 0.41175200  | -2.24027600 |
| C | -4.50283200 | 0.65548300  | -2.22971300 |
| H | -4.46959900 | -1.17988900 | -1.12509000 |
| C | -3.75292100 | 1.64738200  | -2.86221100 |
| H | -1.75999900 | 2.29799200  | -3.38110000 |
| H | -5.58779800 | 0.69858000  | -2.24187400 |
| H | -4.24752300 | -2.47750000 | -3.35727600 |
| C | -2.15128600 | -3.62682400 | 0.74611900  |
| H | -3.01685000 | -4.09271000 | 0.26084500  |
| H | -1.24759900 | -4.11225900 | 0.38584200  |
| H | -2.23103900 | -3.80204100 | 1.82154600  |
| C | 2.72473400  | 4.03131200  | -0.02968700 |
| H | 3.03536000  | 5.00573000  | -0.41729700 |
| H | 1.93904100  | 4.20032900  | 0.71155600  |
| H | 3.59675000  | 3.59785600  | 0.47361600  |
| H | 1.45388900  | 3.67490900  | -1.72354400 |
| C | 3.38617200  | 2.84770200  | -2.16844700 |
| H | 4.17861600  | 2.26881200  | -1.68410300 |
| H | 3.03267200  | 2.28316200  | -3.03790000 |
| H | 3.82307700  | 3.78311600  | -2.53037400 |
| C | -0.51032400 | 2.10044300  | 3.29904000  |
| H | -0.47379000 | 3.18829900  | 3.17062900  |
| H | -0.55363700 | 1.90001100  | 4.37363700  |
| H | 0.42449600  | 1.68166000  | 2.91549000  |
| H | -1.68849600 | 0.39935200  | 2.76115300  |
| C | -3.04876100 | 2.01229600  | 3.15992900  |
| H | -3.11673000 | 1.80462000  | 4.23179300  |
| H | -3.13638800 | 3.09709200  | 3.02987500  |
| H | -3.90978200 | 1.54508400  | 2.66955600  |

## F

|    |             |             |             |
|----|-------------|-------------|-------------|
| N  | 1.39820100  | -1.14856700 | 0.49437900  |
| P  | 0.92880800  | 1.57275600  | -1.16523300 |
| Ir | -0.37943200 | -0.29284800 | -0.65298700 |
| H  | -1.54263800 | 0.34697100  | -1.48614300 |
| H  | -0.28387200 | -0.77376300 | -2.06417500 |
| C  | -2.00636300 | -1.13340900 | 0.72367500  |
| C  | -1.94329600 | -2.13972400 | -0.31572700 |
| H  | -0.74510900 | -1.75646900 | -1.32844600 |
| H  | -0.64048000 | 0.76393800  | 0.55926000  |
| C  | 3.16550400  | -2.44271900 | 1.38369600  |
| H  | 4.10320600  | -2.83325200 | 0.98920300  |
| H  | 2.95438900  | -2.90254100 | 2.35179100  |
| C  | 2.24231800  | -0.41105400 | 1.13133300  |
| O  | 3.33898400  | -1.01210700 | 1.60838800  |
| C  | 1.97253000  | -2.52090500 | 0.40628300  |
| H  | 1.23734800  | -3.23405900 | 0.77920200  |
| C  | 2.33258600  | -2.90853200 | -1.04279300 |
| C  | 2.13680300  | 1.09948400  | 1.28286800  |
| N  | 2.21099300  | 1.70951600  | -0.05328200 |
| H  | 3.14249000  | 1.70161500  | -0.45425400 |
| C  | 1.78565000  | 1.48850300  | -2.77320200 |
| H  | 1.04777700  | 1.59561300  | -3.57707000 |
| H  | -2.65612900 | -2.67097200 | -2.29324000 |
| H  | -3.88103800 | -2.70830400 | -1.01546400 |
| H  | -3.34053500 | -1.15340300 | -1.66879100 |
| C  | 3.17292900  | 1.70039900  | 2.25878500  |
| H  | 4.16764800  | 1.36481900  | 1.93779500  |
| C  | 2.91900000  | 1.18998600  | 3.68715500  |
| H  | 3.66810100  | 1.60134800  | 4.36999200  |
| H  | 1.93290600  | 1.51471700  | 4.04025200  |
| H  | 2.96831000  | 0.10113000  | 3.75389000  |
| C  | 3.13863900  | 3.23422000  | 2.23391100  |
| H  | 3.89000000  | 3.63156400  | 2.92285000  |
| H  | 3.33882100  | 3.63665000  | 1.23860600  |
| H  | 2.16073800  | 3.60627900  | 2.55990700  |
| H  | 1.13780400  | 1.30153100  | 1.68070700  |
| C  | -1.42410400 | -1.43435700 | 2.10561100  |
| H  | -2.07755800 | -2.13727700 | 2.63638500  |



|   |             |             |             |
|---|-------------|-------------|-------------|
| H | -0.42012900 | -1.85460300 | 2.06621800  |
| H | -1.37603100 | -0.51248000 | 2.68738500  |
| C | 3.40124900  | -1.99116000 | -1.64859200 |
| H | 4.37908200  | -2.13694800 | -1.17665800 |
| H | 3.51994700  | -2.19736500 | -2.71628500 |
| H | 3.12889300  | -0.93883400 | -1.53622500 |
| C | 2.74334100  | -4.38587500 | -1.11156700 |
| H | 2.94593400  | -4.67625000 | -2.14672600 |
| C | 3.65368100  | -4.58023900 | -0.53263300 |
| H | 1.95222800  | -5.03775700 | -0.72540300 |
| H | 1.41284100  | -2.78711000 | -1.62482900 |
| C | -1.40849600 | -3.52733900 | -0.00193300 |
| H | -0.63378600 | -3.52760100 | 0.75851700  |
| H | -2.25121500 | -4.11156700 | 0.38700400  |
| H | -1.03553800 | -4.03335700 | -0.89515200 |
| C | -3.29790500 | -0.34407500 | 0.83473800  |
| C | -3.44589200 | 1.02429000  | 0.59212600  |
| C | -4.41885400 | -1.06241200 | 1.29037000  |
| C | -4.67526300 | 1.65964700  | 0.78635500  |
| C | -2.59803700 | 1.59130600  | 0.23781000  |
| C | -5.64731600 | -0.43232000 | 1.48489600  |
| C | -4.32734200 | -2.12599800 | 1.49501000  |
| C | -5.78119900 | 0.93540900  | 1.23132200  |
| H | -4.76257100 | 2.72361900  | 0.58611700  |
| H | -6.49823500 | -1.01005000 | 1.83376400  |
| H | -6.73689900 | 1.42892200  | 1.38017200  |

## G

|    |             |             |             |
|----|-------------|-------------|-------------|
| Ir | 0.42006200  | 0.17309300  | -0.32563900 |
| H  | 1.38413900  | 1.39703600  | -0.45379700 |
| H  | 0.89072700  | -0.06531000 | 1.21475300  |
| H  | -0.45329100 | 0.82299200  | -1.54877600 |
| H  | 0.62733000  | -0.16267300 | -1.94329300 |
| C  | 1.94352100  | -0.91340200 | -1.83879600 |
| C  | 2.38383400  | -0.97552900 | -0.45206000 |
| C  | 2.64391000  | 0.04583000  | -2.80050300 |
| H  | 2.00203200  | 0.27849200  | -3.65369400 |
| H  | 2.93291200  | 0.97416100  | -2.30938800 |
| H  | 3.54691400  | -0.44146600 | -3.18152500 |
| P  | -1.05735300 | 1.53162600  | 0.85961100  |
| N  | -2.65909300 | 1.05221400  | 0.53312300  |
| C  | -0.93389700 | 1.41042700  | 2.67917300  |
| C  | -0.95168700 | 3.36285100  | 0.45565200  |
| C  | -3.00461900 | 0.17877700  | -0.59822700 |
| H  | -3.25469800 | 0.92282100  | 1.34379400  |
| H  | 0.00731300  | 1.85863200  | 3.00237600  |
| H  | -1.76758400 | 1.92146500  | 3.16641500  |
| C  | 0.44041500  | 3.89676800  | 0.84116500  |
| C  | -1.19075300 | 3.55073900  | -1.05290600 |
| C  | -2.04690400 | 4.10768800  | 1.24693300  |
| C  | -2.43820100 | -1.20905600 | -0.32536800 |
| C  | -2.48405400 | 0.55948800  | -1.48070100 |
| C  | -4.51733200 | 0.20053600  | -0.90569000 |
| H  | 1.23914700  | 3.36822500  | 0.31407500  |
| H  | 0.49955500  | 4.95581900  | 0.56818900  |
| H  | 0.62892500  | 3.82588300  | 1.91686600  |
| H  | -1.18625600 | 4.62150400  | -1.28268200 |
| H  | -0.40729100 | 3.07332600  | -1.64613100 |
| H  | -2.16091000 | 3.14826800  | -1.36031800 |
| H  | -2.03922700 | 5.16220400  | 0.95225500  |
| H  | -3.04097700 | 3.70511500  | 1.03211800  |
| H  | -1.87638500 | 4.07007800  | 2.32661500  |
| N  | -1.18538300 | -1.47472400 | -0.16064700 |
| O  | -3.30324800 | -2.21173200 | -0.12361500 |
| H  | -5.05686300 | -0.30720400 | -0.08299700 |
| C  | -4.80820400 | -0.55509900 | -2.21320100 |
| C  | -5.03225600 | 1.64364600  | -1.00485900 |
| H  | -1.10088400 | -2.86038500 | 0.37954300  |
| C  | -2.49772100 | -3.41708000 | 0.05403000  |
| H  | -4.47205600 | -1.59331100 | -2.17533900 |
| H  | -5.88387600 | -0.55779300 | -2.41172300 |
| H  | -4.31495400 | -0.06091400 | -3.05863800 |
| H  | -4.49958000 | 2.19142300  | -1.79120600 |
| H  | -6.09569800 | 1.64098600  | -1.26187000 |
| H  | -4.90846600 | 2.19443300  | -0.07011400 |
| H  | -0.34304800 | -3.41821700 | -0.17199900 |
| C  | -0.72950000 | -2.84306100 | 1.87937300  |
| H  | -2.95213100 | -4.01200700 | 0.84517200  |
| H  | -2.52446000 | -3.97052300 | -0.88807700 |
| H  | -0.93002600 | 0.35684200  | 2.95596900  |
| C  | 2.38022400  | -2.32244600 | 0.26198200  |
| H  | 1.48321000  | -2.90588500 | 0.08258500  |
| C  | 3.23655000  | -2.91191000 | -0.08860900 |
| H  | 2.49144900  | -2.17800800 | -1.33712700 |
| C  | 3.61525700  | -0.18495200 | -0.04265800 |
| C  | 3.64173700  | 0.80261500  | 0.94991500  |
| C  | 4.83541800  | -0.57214100 | -0.62535000 |
| C  | 4.84416900  | 1.40660600  | 1.32593900  |
| C  | 2.71551400  | 1.10531200  | 1.42159800  |
| C  | 6.03631300  | 0.03224700  | -0.25459700 |
| C  | 4.84686900  | -1.35793900 | -1.37572200 |
| C  | 6.04476500  | 1.03043500  | 0.72236300  |
| H  | 4.83743700  | 2.17503100  | 2.09364300  |
| H  | 6.96291400  | -0.27933500 | -0.72776300 |
| H  | 6.97728500  | 1.50513400  | 1.01265900  |
| C  | 1.44224000  | -2.18549900 | -2.51536800 |
| C  | 0.70171100  | -2.71843900 | -1.92175100 |
| H  | 0.99899600  | -1.95716600 | -3.48736000 |
| H  | 2.29842100  | -2.85041800 | -2.67962200 |
| C  | -1.84885800 | -2.27855100 | 2.76640300  |
| H  | -2.69423500 | -2.96997500 | 2.84511000  |
| H  | -1.47486200 | -2.10754400 | 3.78023800  |
| H  | -2.23246600 | -1.32774800 | 2.38704400  |
| H  | 0.13416200  | -2.17390800 | 1.96213700  |
| C  | -0.30843900 | -4.24373100 | 2.34259900  |
| C  | 0.53958600  | -4.62073400 | 1.76117000  |
| H  | -0.01445900 | -4.22611700 | 3.39624000  |
| H  | -1.13173100 | -4.96064700 | 2.24198800  |

## H

|    |             |             |             |
|----|-------------|-------------|-------------|
| Ir | -0.00803400 | -1.06677900 | -0.15180000 |
| H  | 0.20249400  | -2.80716200 | 0.05150900  |
| H  | -0.54976900 | -1.01460700 | 1.38079900  |
| H  | -1.15701400 | -1.13956200 | -1.30317400 |
| H  | -0.28196900 | -1.34193300 | -1.78362700 |

|   |             |             |             |
|---|-------------|-------------|-------------|
| C | -1.70274100 | -1.56298400 | -1.78973600 |
| C | -2.20560300 | -1.62992600 | -0.41713600 |
| P | 1.95090300  | -0.59617900 | 1.00025100  |
| N | 2.70496800  | 0.73634600  | 0.25892800  |
| C | 1.69931200  | -0.06533500 | 2.71382800  |
| C | 3.22852000  | -1.96629000 | 1.04259600  |
| C | 2.28841800  | 1.32673900  | -1.02078800 |
| H | 3.09722000  | 1.41220700  | 0.90275400  |
| H | 1.37431100  | -0.92339600 | 3.32289600  |
| H | 2.61530300  | 0.34673600  | 3.16181900  |
| C | 2.66291300  | -3.17844000 | 1.80549500  |
| C | 3.56707500  | -2.36161300 | -0.40650700 |
| C | 4.49973000  | -1.43687300 | 1.73917700  |
| C | 0.86305400  | 1.85568700  | -0.92356500 |
| H | 2.25398600  | 0.52713600  | -1.76723300 |
| C | 3.31872500  | 2.36943000  | -1.51503000 |
| H | 1.74167000  | -3.54968300 | 1.34809800  |
| C | 3.40145000  | -3.98684200 | 1.78226200  |
| H | 2.46147000  | -2.95014900 | 2.85661000  |
| H | 4.35868200  | -3.11821000 | -0.39230500 |
| H | 2.70082300  | -2.78621500 | -0.91982100 |
| H | 3.93238200  | -1.50483600 | -0.98172800 |
| H | 5.27134300  | -2.21291400 | 1.70218900  |
| H | 4.89235100  | -0.54964000 | 1.23380600  |
| H | 4.32908300  | -1.19751700 | 2.79277300  |
| N | -0.13559300 | 1.19141000  | -0.44636400 |
| O | 0.62336800  | 3.11893100  | -1.29549000 |
| C | 4.62106000  | 1.66746600  | -1.92408400 |
| C | -1.22991600 | 2.17506900  | -0.20837700 |
| C | -0.82296100 | 3.31120300  | -1.15834600 |
| H | 4.44432400  | 0.91483100  | -2.69992700 |
| H | 5.33757900  | 2.39551600  | -2.31555000 |
| H | 5.08018700  | 1.16779300  | -1.06533600 |
| H | -2.18878400 | 1.73641000  | -0.48563400 |
| C | -1.28591600 | 2.57797300  | 1.28446300  |
| H | -0.98596800 | 4.31661300  | -0.77305900 |
| H | -1.26278200 | 3.21614300  | -2.15485800 |
| H | 0.90978700  | 0.68649000  | 2.74600900  |
| C | -2.02073800 | -0.37695200 | -2.70259300 |
| H | -1.20857600 | -0.22150100 | -3.41708900 |
| H | -2.92323000 | -0.60663300 | -3.27920400 |
| H | -2.17930600 | -0.54639900 | -2.15284000 |
| C | -2.48038600 | -3.00984200 | -0.18654700 |
| H | -3.44406200 | -3.37597700 | -0.19158600 |
| H | -1.71282500 | -3.74617500 | -0.04537700 |
| H | -2.55578200 | -2.92989500 | 1.27154700  |
| C | -3.24224300 | -0.65458800 | 0.09370200  |
| C | -4.35636200 | -0.32539000 | -0.69596800 |
| C | -3.24566300 | -0.24050500 | 1.43568500  |
| C | -5.40770200 | 0.43597700  | -0.17872100 |
| H | -4.42557200 | -0.68547900 | -1.71524900 |
| C | -4.30031200 | 0.50312500  | 1.96021400  |
| H | -2.40273200 | -0.50449400 | 2.06505800  |
| C | -5.38373900 | 0.85658800  | 1.15065500  |
| H | -6.25147400 | 0.68368100  | -0.81586700 |
| H | -4.26934100 | 0.81800900  | 2.99884400  |
| H | -6.20082700 | 1.44615900  | 1.55504200  |
| H | -1.57178900 | -2.87043800 | -2.57729500 |
| H | -1.03802400 | -2.70045300 | -3.51599800 |
| H | -1.05036400 | -3.64790700 | -2.02160400 |
| H | -2.58045400 | -3.22643400 | -2.81376100 |
| H | 2.87187800  | 2.82217100  | -2.40720400 |
| C | 3.59255000  | 3.49321400  | -0.50152700 |
| H | 4.20932000  | 4.26665200  | -0.96796900 |
| H | 2.67077100  | 3.96320400  | -0.15088400 |
| H | 4.15404500  | 3.12930400  | 0.36726400  |
| C | -0.00875800 | 3.26743300  | 1.78713900  |
| C | 0.13909100  | 4.24474700  | 1.31546900  |
| H | -0.07575100 | 3.43292600  | 2.86650400  |
| H | 0.88630100  | 2.66802300  | 1.60201400  |
| H | -1.40830300 | 1.63934900  | 1.83621700  |
| C | -2.51563800 | 3.45882500  | 1.54742600  |
| H | -3.43586400 | 2.97302000  | 1.21356600  |
| H | -2.61174900 | 3.66551900  | 2.61772400  |
| H | -2.43143500 | 4.42419700  | 1.03536700  |

## TSs for the migratory insertion pathway

## I

|    |             |             |             |
|----|-------------|-------------|-------------|
| N  | 0.26801400  | 1.49240400  | -0.14983300 |
| P  | -2.24798600 | -0.55533400 | -0.44529900 |
| Ir | 0.01513700  | -0.54372000 | -1.15552200 |
| H  | -0.27810900 | -1.90307600 | -1.88548900 |
| H  | 0.22080000  | 0.15398300  | -2.67506900 |
| C  | 1.84921200  | -1.72870300 | -0.17107700 |
| C  | 2.15771900  | -1.05982100 | -1.44423500 |
| H  | -0.68068900 | 0.24059000  | -2.48550600 |
| H  | 0.52394900  | -1.40183000 | 0.21332500  |
| C  | 0.70228400  | 3.75487200  | 0.39530000  |
| H  | 0.32769600  | 4.70949900  | 0.02649800  |
| H  | 1.56976400  | 3.92502200  | 1.03691800  |
| C  | -0.43586200 | 1.87402100  | 0.86234600  |
| O  | -0.34194900 | 3.16008300  | 1.21995000  |
| C  | 0.95862100  | 2.69705400  | -0.70036800 |
| H  | 2.02411200  | 2.48338700  | -0.77563000 |
| C  | 0.44276300  | 3.08116000  | -2.10311600 |
| C  | -1.42361900 | 1.00889500  | 1.64073400  |
| H  | -0.89678800 | 0.08589300  | 1.89528800  |
| C  | -1.88670900 | 1.65326500  | 2.96753100  |
| C  | -2.26843900 | 2.65559900  | 2.73755400  |
| C  | -0.69792300 | 1.78842400  | 3.93483600  |
| H  | 0.12313000  | 2.36873700  | 3.50767300  |
| H  | -1.01572700 | 2.28776800  | 4.85462800  |
| H  | -0.31584800 | 0.79823700  | 4.21157900  |
| C  | -3.00895200 | 0.83844700  | 3.62342500  |
| H  | -2.66381100 | -0.17095800 | 3.87468100  |
| H  | -3.32002100 | 1.32219400  | 4.55423700  |
| H  | -3.88193600 | 0.74398400  | 2.97492600  |
| N  | -2.53607900 | 0.61315000  | 0.77475000  |
| H  | -3.17170800 | 1.36688100  | 0.53800700  |
| C  | -3.47195400 | -0.07996200 | -1.724      |

|   |             |             |             |
|---|-------------|-------------|-------------|
| H | -3.27641800 | -3.08378600 | -1.70423900 |
| C | -2.05289500 | -2.52553400 | 1.51539300  |
| H | -2.37543800 | -3.49755200 | 1.90346400  |
| H | -0.98501100 | -2.59756400 | 1.28941100  |
| C | -2.19631200 | -1.78995600 | 2.31087200  |
| H | -4.36521600 | -2.03418400 | 0.66412800  |
| H | -4.68578700 | -2.94091800 | 1.18837900  |
| H | -4.51529700 | -1.18391400 | 1.33559300  |
| H | -5.01604900 | -1.91430100 | -0.20661000 |
| C | 1.67796000  | -3.25182800 | -0.15267500 |
| H | 1.02540500  | -3.60120000 | -0.95097400 |
| H | 2.66189200  | -3.71494000 | -0.27519000 |
| H | 1.26776900  | -3.57932500 | 0.80530200  |
| C | 2.40674600  | -1.92027000 | -2.67862800 |
| H | 3.40304000  | -2.37954400 | -2.61086000 |
| H | 1.67467200  | -2.71541100 | -2.81536700 |
| H | 2.39152600  | -1.29584900 | -3.57599700 |
| C | 2.57725200  | -1.23207500 | 1.06607200  |
| C | 1.97975600  | -0.48447200 | 2.08046000  |
| C | 3.93217700  | -1.57980100 | 1.19162800  |
| C | 2.71111300  | -0.07645200 | 3.19802100  |
| H | 0.94009300  | -0.20954200 | 1.98935900  |
| C | 4.66454800  | -1.17794800 | 2.30790600  |
| H | 4.41715800  | -2.15787300 | 0.41043000  |
| C | 4.05740000  | -0.42205700 | 3.31536100  |
| H | 2.22416700  | 0.51037800  | 3.97115000  |
| H | 5.71193700  | -1.45280400 | 2.38845400  |
| C | 3.10977000  | 0.12768100  | -1.40441100 |
| H | 4.14911000  | -0.22727200 | -1.41481200 |
| H | 2.96790100  | 0.75989300  | -2.28470600 |
| H | 2.98391600  | 0.73179900  | -0.50746800 |
| H | 4.63023700  | -0.10657700 | 4.18195800  |
| C | -1.06618600 | 3.35167200  | -2.12489300 |
| H | -1.32547500 | 4.24517500  | -1.54609000 |
| H | -1.41117300 | 3.51390100  | -3.15010500 |
| H | -1.62697300 | 2.51081800  | -1.70812500 |
| H | 0.64981500  | 2.22096400  | -2.74937800 |
| C | 1.24338300  | 4.26668900  | -2.66140900 |
| H | 0.93732100  | 4.47850600  | -3.69014100 |
| H | 1.07888900  | 5.17924900  | -2.07776500 |
| H | 2.31818200  | 4.05632400  | -2.66422200 |

**J**

|    |             |             |             |
|----|-------------|-------------|-------------|
| N  | 1.45453200  | -1.05471300 | 0.41276400  |
| P  | 0.81357100  | 1.61566700  | -1.03918800 |
| Ir | -0.27343900 | -0.50135800 | -0.92366500 |
| H  | -1.45029800 | -0.02039500 | -1.85422800 |
| H  | 0.21910800  | -1.58020900 | -2.10190400 |
| C  | -1.91773000 | -1.20692500 | 0.69252300  |
| C  | -1.59776400 | -2.18448800 | -0.37333900 |
| H  | 0.61832400  | -0.74920200 | -2.32386000 |
| H  | -1.23246000 | -0.05617900 | 0.42453300  |
| C  | 2.97101500  | -2.22278500 | 1.75942600  |
| H  | 4.03596800  | -2.44486800 | 1.80903200  |
| H  | 2.42363300  | -2.86067100 | 2.45821500  |
| C  | 1.84590700  | -0.31605500 | 1.39657700  |
| O  | 2.78186400  | -0.83566700 | 2.19899600  |
| C  | 2.36636000  | -2.22903800 | 0.34492900  |
| H  | 1.77865100  | -3.12940300 | 0.16984300  |
| C  | 3.38440000  | -2.07108000 | -0.80772100 |
| C  | 1.32546900  | 1.09227000  | 1.66006200  |
| C  | 0.24835500  | 0.97144200  | 1.81442000  |
| C  | 1.89354400  | 1.74902300  | 2.93926600  |
| N  | 1.51323800  | 1.95115100  | 0.48505600  |
| H  | 2.42539900  | 2.39035400  | 0.45479300  |
| C  | 2.24742300  | 1.62217900  | -2.18758000 |
| H  | 1.88782700  | 1.58752600  | -3.21797500 |
| H  | 2.86848700  | 2.51199100  | -2.05635300 |
| H  | 2.84702500  | 0.73276700  | -1.99874700 |
| C  | -0.15557400 | 3.15452000  | -1.50804100 |
| C  | -0.63609600 | 3.01315100  | -2.96521400 |
| H  | -1.19779000 | 2.08490500  | -3.11399900 |
| H  | -1.30211800 | 3.84948100  | -3.20393100 |
| H  | 0.19099500  | 3.03986700  | -3.68045000 |
| C  | -1.37338700 | 3.24881900  | -0.57722300 |
| H  | -1.91590000 | 4.17955600  | -0.77598800 |
| H  | -2.05842700 | 2.41743100  | -0.75434600 |
| H  | -1.07928200 | 3.25269300  | 0.47781100  |
| C  | 0.72471200  | 4.40770100  | -1.34247800 |
| H  | 0.12904500  | 5.29678400  | -1.57643200 |
| H  | 1.08576900  | 4.50768000  | -0.31433000 |
| H  | 1.58582700  | 4.40595400  | -2.01731700 |
| C  | -0.91340700 | -3.48145800 | 0.03666500  |
| H  | -0.13662300 | -3.35035200 | 0.78657700  |
| H  | -1.65891400 | -4.17627200 | 0.45404200  |
| H  | -0.46686000 | -3.96584200 | -0.83575800 |
| C  | -1.39533100 | -1.47641700 | 2.10956000  |
| H  | -1.98341700 | -2.29351000 | 2.53863600  |
| H  | -0.34540800 | -1.76076400 | 2.12543700  |
| H  | -1.53560900 | -0.59528500 | 2.73984600  |
| C  | -3.31048100 | -0.60174600 | 0.76966100  |
| C  | -3.51233800 | 0.77059300  | 0.94289600  |
| C  | -4.41583400 | -1.46130700 | 0.84213800  |
| C  | -4.79475500 | 1.28701300  | 1.13142500  |
| H  | -2.66051800 | 1.43937000  | 0.93601300  |
| C  | -5.69924600 | -0.94819900 | 1.03594400  |
| H  | -4.27648900 | -2.53345100 | 0.75533200  |
| C  | -5.89495900 | 0.42819500  | 1.17065700  |
| H  | -4.93020200 | 2.35776100  | 1.25087200  |
| H  | -6.54560900 | -1.62694000 | 1.08141000  |
| H  | -6.89482100 | 0.82647100  | 1.31378600  |
| C  | -2.62185200 | -2.44623700 | -1.47710800 |
| H  | -3.33396900 | -3.22200900 | -1.16722400 |
| H  | -3.18771900 | -1.55521800 | -1.74899200 |
| H  | -2.11441000 | -2.81354100 | -2.37089600 |
| C  | 3.37781400  | 2.13533600  | 2.82429700  |
| C  | 3.75217300  | 2.45167200  | 3.80210900  |
| H  | 3.99388900  | 1.30113900  | 2.48059400  |
| C  | 3.52312200  | 2.98307500  | 2.14439100  |
| C  | 1.03731300  | 2.96287800  | 3.32565800  |
| H  | 1.06329300  | 3.72009300  | 2.53602000  |
| H  | -0.00796400 | 2.68017200  | 3.49032500  |
| H  | 1.41421900  | 3.41700100  | 4.24671100  |
| H  | 1.80182800  | 0.99131900  | 3.72618300  |
| C  | 4.08609800  | -3.40912700 | -1.08034200 |
| H  | 4.78095100  | -3.31350400 | -1.91991100 |
| H  | 4.66572900  | -3.73764500 | -0.20962600 |
| H  | 3.36549600  | -4.19693100 | -1.32334800 |
| H  | 4.41017800  | -0.95367200 | -0.56331300 |
| C  | 5.11617600  | -1.22477300 | 0.22821900  |

**K**

|    |             |             |             |
|----|-------------|-------------|-------------|
| N  | -1.26149000 | -1.43414400 | -0.34339300 |
| P  | -0.87125600 | 1.50057400  | 0.67992800  |
| Ir | 0.42343400  | 0.10686500  | -0.72359000 |
| H  | 1.37720200  | -0.44018700 | 0.57364500  |
| C  | 2.06616200  | -1.11801900 | -1.56067400 |
| C  | 2.40217500  | -1.09147400 | -0.12388000 |
| C  | -2.62811100 | -3.33952500 | -0.25512000 |
| H  | -3.12298600 | -3.98328300 | 0.47085700  |
| H  | -2.62957400 | -3.81506900 | -1.23955500 |
| C  | -2.50679100 | -1.11174400 | -0.46859900 |
| O  | -3.40162400 | -2.10348500 | -0.35952800 |
| C  | -1.24012600 | -2.83493100 | 0.16301500  |
| H  | -0.45970100 | -3.40218000 | -0.34357300 |
| C  | -0.97736700 | -2.84742300 | 1.68941700  |
| C  | -3.02751800 | 0.31082700  | -0.62949400 |
| H  | -2.59975900 | 0.67959500  | -1.56650700 |
| C  | -4.56514500 | 0.41710400  | -0.77181600 |
| N  | -2.52972300 | 1.15821500  | 0.45973400  |
| C  | -3.09550900 | 1.12065000  | 1.29816000  |
| H  | -0.60907100 | 1.24636700  | 2.47856000  |
| H  | 0.37112900  | 1.63638800  | 2.76092900  |
| H  | -1.37512400 | 1.74918800  | 3.07425000  |
| H  | -0.62711500 | 0.17596200  | 2.68558800  |
| C  | -0.71144100 | 3.35123500  | 0.40508000  |
| C  | 0.73364300  | 3.79062200  | 0.70553600  |
| H  | 1.45833400  | 3.25372000  | 0.08654600  |
| H  | 0.83544800  | 4.85956400  | 0.48836100  |
| H  | 1.00094800  | 3.64630200  | 1.75746200  |
| C  | -1.04812900 | 3.62903400  | -1.07229200 |
| H  | -1.01661900 | 4.70872600  | -1.25410900 |
| H  | -0.32600700 | 3.15516800  | -1.74357800 |
| H  | -2.05268100 | 3.27664500  | -1.32787100 |
| C  | -1.70153300 | 4.10573200  | -1.31276400 |
| H  | -1.65137100 | 5.17664800  | 1.08795600  |
| H  | -2.73069200 | 3.77519500  | 1.14321400  |
| H  | -1.46422800 | 3.98375100  | 2.37390200  |
| H  | -0.02551200 | 0.14801700  | -2.34682900 |
| H  | -0.53074800 | 0.80927200  | -1.92990200 |
| H  | 1.42319000  | 1.28557600  | -0.97073800 |
| C  | 2.35827900  | -2.41042200 | 0.65282300  |
| H  | 1.48896200  | -3.01422600 | 0.41079600  |
| H  | 3.24736300  | -2.98759700 | 0.38113800  |
| H  | 2.38413800  | -2.23480400 | 1.73010500  |
| C  | 3.57691800  | -0.23596500 | 0.32838100  |
| C  | 3.44075700  | 0.94253200  | 1.06721900  |
| C  | 4.86717700  | -0.69805600 | 0.02507900  |
| C  | 4.56628000  | 1.65529500  | 1.48680300  |
| H  | 2.45122200  | 1.31462200  | 1.30523100  |
| C  | 5.99176700  | 0.01411100  | 0.44079400  |
| H  | 4.99422100  | -1.61162000 | -0.54860500 |
| C  | 5.84566600  | 1.19524500  | 1.17339000  |
| H  | 4.43771600  | 2.57100900  | 2.05623100  |
| H  | 6.98206600  | -0.35360600 | 0.18932500  |
| C  | 1.64127100  | -2.43740900 | -2.19235400 |
| H  | 0.83979900  | -2.94368700 | -1.65856500 |
| H  | 1.28902700  | -2.25784500 | -3.21124900 |
| H  | 2.49596400  | -3.12533700 | -2.25113700 |
| H  | 6.72137100  | 1.75035600  | 1.49558300  |
| C  | 2.94700500  | -0.31871500 | -2.51851100 |
| H  | 3.27491100  | 0.63258800  | -2.10036200 |
| H  | 3.84251600  | -0.90196700 | -2.77328600 |
| H  | 2.40564800  | -0.11956200 | -3.44682700 |
| C  | -2.12725500 | -2.25048200 | 2.51556000  |
| H  | -2.40686400 | -1.25038900 | 2.17387700  |
| H  | -3.02201200 | -2.88031200 | 2.48242800  |
| H  | -1.82606800 | -2.16776100 | 3.56403800  |
| C  | -0.64636100 | -4.27037400 | -2.15975900 |
| H  | 0.22024300  | -4.68114100 | 1.63139900  |
| H  | -0.42392300 | -4.27803800 | 3.23070600  |
| H  | -1.49177800 | -4.94791100 | 1.99343300  |
| H  | -0.09618000 | -2.21445300 | 1.84557800  |
| C  | -4.94335800 | 1.80074600  | -1.31924400 |
| H  | -4.63786300 | 2.58974700  | -0.62475400 |
| H  | -4.46655400 | 1.99520700  | -2.28598900 |
| H  | -6.02634100 | 1.87169300  | -1.45732200 |
| H  | -4.84702200 | -0.33960100 | -1.51290500 |
| C  | -5.32991400 | 0.11628900  | 0.52809100  |
| H  | -6.40252200 | 0.06903400  | 0.31919000  |
| H  | -5.02965500 | -0.83627600 | 0.97013200  |
| H  | -5.19094400 | 0.91034700  | 1.27129500  |

**L**

|    |             |             |             |
|----|-------------|-------------|-------------|
| N  | 0.23744900  | 1.43950700  | -0.71930000 |
| P  | 1.67026300  | -0.89404500 | 0.91787300  |
| Ir | 0.00253900  | -0.90644400 | -0.75165600 |
| H  | -1.09247400 | -1.18923700 | 0.49263700  |
| C  | -2.02175100 | -1.22219100 | -1.65761200 |
| C  | -2.27802600 | -1.51149400 | -0.23848900 |
| C  | 0.10689000  | 3.75526800  | -1.21937400 |
| H  | -0.11862500 | 4.64367000  | -0.62881600 |
| H  | 0.10507900  | 4.01147300  | -2.28143700 |
| C  | 1.40112200  | 1.99587900  | -0.67779100 |
| O  | 1.45464700  | 3.32083800  | -0.87522300 |
| C  | -0.76615900 | 2.52778600  | -0.88861200 |
| C  | -1.39813400 | 2.28435600  | -1.74127000 |
| C  | -1.64675300 | 2.66006100  | 0.36710300  |
| C  | 2.73028800  | 1.28469400  | -0.43763700 |
| H  | 2.85254400  | 0.61446900  | -1.29570800 |
| C  | 3.95757300  | 2.22886300  | -0.42906200 |
| N  | 2.69460500  | 0.45874300  | 0.76737300  |
| H  | 2.84965500  | 0.98074000  | 1.62093800  |
| C  | 1.00982100  | -0.68935800 | 2.61768400  |
| H  | 0.41973200  | -1.56520900 | 2.89419000  |
| H  | 1.81350400  | -0.55325800 | 3.3457720   |

|   |             |             |             |
|---|-------------|-------------|-------------|
| H | 2.74516100  | -2.68096600 | -1.18494600 |
| H | 4.05689800  | -1.60823500 | -0.64249200 |
| C | 3.88853300  | -2.17694900 | 2.06710200  |
| H | 4.59637400  | -3.01217300 | 2.03070800  |
| H | 4.44939200  | -1.25231100 | 1.90115600  |
| H | 3.46437800  | -2.15324200 | 3.07548300  |
| H | 0.47732400  | -0.75697400 | -2.36118500 |
| H | 1.27435600  | -3.79316500 | -1.85081700 |
| H | 0.13084600  | -2.45861700 | -0.86607700 |
| C | -2.41786500 | -2.97276400 | 0.20357900  |
| C | -3.20212100 | -0.63653100 | 0.59160800  |
| C | -2.83878200 | -0.19426400 | 1.87030400  |
| C | -4.50299600 | -0.38329100 | 0.13592900  |
| C | -3.73312600 | 0.52784000  | 2.65949400  |
| H | -1.83769200 | -0.39280300 | 2.23951500  |
| C | -5.40047500 | 0.33975100  | 0.92411800  |
| H | -4.81937200 | -0.75227400 | -0.83355500 |
| C | -5.01630700 | 0.80611200  | 2.18293900  |
| H | -3.42456000 | 0.87673400  | 3.64008600  |
| H | -6.40047200 | 0.53793300  | 0.55062300  |
| C | -2.03880300 | -2.38321700 | -2.64941700 |
| H | -1.46735300 | -3.25165300 | -2.32379300 |
| H | -3.07541600 | -2.70226300 | -2.82800600 |
| H | -1.62440400 | -2.05351300 | -3.60569600 |
| H | -3.41926800 | -3.31311100 | -0.08996700 |
| H | -1.67807100 | -3.62494600 | -0.25614200 |
| H | -2.33040500 | -3.05321700 | 1.28933600  |
| C | -2.62494200 | 0.02565300  | -2.28848500 |
| H | -3.60613300 | -0.20725800 | -2.72276700 |
| H | -2.77136400 | 0.83223600  | -1.57427400 |
| H | -1.98934800 | 0.38158100  | -3.10296000 |
| H | -5.71331100 | 1.37498600  | 2.79044700  |
| C | 4.01901300  | 3.13752000  | 0.81002300  |
| H | 4.82492200  | 3.86787900  | 0.69250800  |
| H | 3.08652200  | 3.68666900  | 0.96117900  |
| H | 4.24377900  | 2.56627800  | 1.71858600  |
| H | 3.85136800  | 2.86815300  | -1.31202100 |
| C | 5.24900200  | 1.41192900  | -0.57490100 |
| H | 5.37776100  | 0.73122800  | 0.27222900  |
| H | 5.24471400  | 0.81475700  | -1.49322500 |
| H | 6.11649100  | 2.07770700  | -0.61012400 |
| C | -0.85343100 | 3.03974500  | 1.62331800  |
| H | -0.47253900 | 4.06608900  | 1.57443400  |
| H | -1.49654400 | 2.97060200  | 2.50574600  |
| H | -0.00142300 | 2.37064900  | 1.77702100  |
| H | -2.06574100 | 1.66641600  | 0.53384200  |
| C | -2.81439300 | 3.62334600  | 0.11948200  |
| H | -3.48592800 | 3.63095600  | 0.98316700  |
| H | -2.46581100 | 4.65037200  | -0.04092100 |
| H | -3.40022200 | 3.32472300  | -0.75686800 |

## M

|    |             |             |              |
|----|-------------|-------------|--------------|
| N  | -0.88168500 | 1.48854100  | 0.24909300   |
| P  | -1.33263000 | -1.37682400 | -1.04813700  |
| Ir | 0.56449400  | -0.11945200 | -0.139722100 |
| H  | 1.52945000  | -1.25779700 | -0.89470800  |
| H  | 1.18255600  | 0.91013600  | -1.57152100  |
| C  | 1.61530400  | -0.40304200 | 1.72937600   |
| C  | 2.26172700  | 0.58945200  | 0.84572100   |
| H  | 0.49043600  | 0.41525700  | -1.98832800  |
| H  | 0.50124100  | -0.93106800 | 1.07595600   |
| C  | -1.92281000 | 3.49713100  | 0.86710400   |
| H  | -2.58610800 | 4.24381300  | 0.43256500   |
| H  | -1.49978300 | 3.87344000  | 1.80228000   |
| C  | -1.99750600 | 1.25493600  | 0.85361300   |
| O  | -2.73077800 | 2.32084800  | 1.19496000   |
| C  | -0.85513700 | 2.93884900  | -0.09149000  |
| H  | 0.12844500  | 3.34688700  | 0.13771900   |
| C  | -1.14197000 | 3.16641400  | -1.59360500  |
| C  | -2.54676500 | -0.13842700 | 1.13242500   |
| H  | -1.78136800 | -0.63382700 | 1.73796000   |
| C  | -3.85973800 | -0.14597600 | 1.94970800   |
| C  | -3.70263400 | 0.56098400  | 2.77245500   |
| C  | -4.10243900 | -1.54036300 | 2.54259200   |
| H  | -3.27670400 | -1.84966100 | 3.19240400   |
| H  | -5.02022000 | -1.54667500 | 3.13795600   |
| H  | -4.20889100 | -2.28528000 | 1.74776900   |
| C  | -5.08046700 | 0.32657100  | 1.14206600   |
| H  | -5.37278700 | -0.41543300 | 0.39001200   |
| H  | -5.93780700 | 0.45270200  | 1.80934100   |
| H  | -4.89812600 | 1.28137600  | 0.64283900   |
| N  | -2.68374200 | -0.89631300 | -0.11587000  |
| H  | -3.51923000 | -0.66914000 | -0.64073000  |
| C  | -1.91287900 | -1.12380300 | -2.76903200  |
| H  | -1.20228900 | -1.58860400 | -3.45598700  |
| H  | -2.90105500 | -1.56258100 | -2.92635700  |
| H  | -1.94964100 | -0.05327600 | -2.97637400  |
| C  | -1.22760700 | -3.24041500 | -0.82887500  |
| C  | -0.05671000 | -3.78586300 | -1.66591400  |
| H  | 0.89353300  | -3.33618500 | -1.36484900  |
| H  | 0.01701400  | -4.86849900 | -1.51581600  |
| H  | -0.19773400 | -3.61252900 | -2.73763000  |
| C  | -0.98150900 | -3.52696100 | 0.66322500   |
| H  | -0.92532200 | -4.60963000 | 0.81914400   |
| H  | -0.03673300 | -3.09502200 | 1.00213000   |
| H  | -1.79210500 | -3.14108100 | 1.28843200   |
| C  | -2.55337500 | -3.89475500 | -1.26391200  |
| H  | -2.51737000 | -4.96515600 | -1.03420300  |
| H  | -3.40634600 | -3.46518900 | -0.72942400  |
| H  | -2.72745200 | -3.79740100 | -2.33935300  |
| C  | 2.31906600  | -1.73950700 | 1.95967600   |
| H  | 2.76632700  | -2.12307700 | 1.04345200   |
| H  | 3.11418000  | -1.58999900 | 2.69614500   |
| H  | 1.62677400  | -2.48272600 | 2.36228100   |
| C  | 2.17991500  | 2.05997300  | 1.25785900   |
| H  | 2.90076000  | 2.26916100  | 2.05846600   |
| H  | 2.43716400  | 2.69928300  | 0.41008500   |
| H  | 1.19512000  | 2.34637100  | 1.62186800   |
| C  | -2.54079600 | 2.70253700  | -2.02141200  |
| C  | -3.32759900 | 3.32007800  | -1.57513700  |
| H  | -2.64579700 | 2.77589300  | -3.10784000  |
| H  | -2.72902000 | 1.66343800  | -1.73837400  |
| C  | -0.90375300 | 4.63866300  | -1.95811500  |
| H  | -1.04973300 | 4.79388600  | -3.03110300  |
| H  | -1.60205900 | 5.30026100  | -1.43286200  |
| H  | 0.11416400  | 4.95322400  | -1.70516800  |
| H  | -0.40325900 | 2.56380800  | -2.13487600  |
| C  | 3.66650700  | 0.27630500  | 0.35457300   |
| C  | 4.01789700  | 0.08828400  | -0.98760900  |
| C  | 4.70010000  | 0.26337600  | 1.31000500   |

## N

|    |             |             |             |
|----|-------------|-------------|-------------|
| N  | 0.50642900  | 1.17935200  | -0.02355600 |
| P  | -2.24810400 | -0.18803700 | -0.99228400 |
| Ir | -0.03834400 | -0.95752400 | -0.54174400 |
| H  | -0.48486300 | -2.41969500 | -0.90938800 |
| H  | 0.99670700  | -1.06336600 | -1.81075500 |
| C  | 0.61935000  | -1.67606700 | 1.65563100  |
| C  | 1.62760200  | -1.89981600 | 0.58192200  |
| H  | 0.11917100  | -0.67232000 | -2.15588800 |
| H  | -0.49837300 | -1.24095900 | 1.08680600  |
| C  | 1.50556800  | 3.30035500  | 0.27101200  |
| H  | 1.64001800  | 4.16740500  | -0.37542200 |
| H  | 2.10572000  | 3.42136000  | 1.17559300  |
| C  | -0.31168400 | 2.00442700  | 0.53530700  |
| O  | 0.10365100  | 3.26733800  | 0.67975200  |
| C  | 1.72476200  | 1.93801300  | -0.42320000 |
| H  | 2.59457500  | 1.42943000  | -0.00690900 |
| C  | 1.88240300  | 2.00890400  | -1.95597200 |
| C  | -1.72799900 | 1.66224900  | 0.98301500  |
| H  | -1.64188800 | 0.76999500  | 1.60980800  |
| C  | -2.38805500 | 2.76549200  | 1.84105200  |
| H  | -2.32223100 | 3.70815700  | 1.28286900  |
| C  | -1.63450900 | 2.92751500  | 3.17208500  |
| H  | -0.57725400 | 3.15796900  | 3.02529700  |
| H  | -2.07634800 | 3.73933100  | 3.75701200  |
| H  | -1.70917800 | 2.01032200  | 3.76843800  |
| C  | -3.86604700 | 2.44956800  | 2.10604400  |
| H  | -3.97035100 | 1.49601400  | 2.63644400  |
| H  | -4.30414300 | 3.22980100  | 2.73577100  |
| H  | -4.44743900 | 2.38661700  | 1.18400100  |
| N  | -2.53884100 | 1.28748400  | -0.17856500 |
| H  | -2.83734600 | 2.06982600  | -0.74920500 |
| C  | -2.60638300 | 0.24178300  | -2.73719600 |
| H  | -2.61921800 | -0.67136000 | -3.33563900 |
| H  | -3.57138300 | 0.74573600  | -2.82909700 |
| H  | -1.81715800 | 0.89419800  | -3.11349500 |
| C  | -3.64609900 | -1.33167900 | -0.46290900 |
| C  | -3.52968200 | -2.66500300 | -1.22411400 |
| H  | -2.57447900 | -3.16028000 | -1.02835400 |
| H  | -4.33163700 | -3.33414600 | -0.89354000 |
| C  | -3.63726600 | -2.53536600 | -2.30547700 |
| C  | -3.50734200 | -1.58333900 | 1.04966200  |
| H  | -4.31820000 | -2.23994900 | 1.38256300  |
| H  | -2.56236500 | -2.07695900 | 1.29289000  |
| H  | -3.57878400 | -0.65387000 | 1.62191700  |
| C  | -5.00596700 | -0.66672700 | -0.74894100 |
| H  | -5.80452200 | -1.30057500 | -0.34843600 |
| H  | -5.07939800 | 0.31309800  | -0.26856400 |
| H  | -5.19083400 | -0.54845100 | -1.82054000 |
| C  | 0.79890800  | -0.55072100 | 2.67944900  |
| H  | 1.38136700  | -0.92735000 | 3.52447200  |
| H  | 1.30201400  | 0.32007600  | 2.26436400  |
| H  | -0.17203200 | -0.24463100 | 3.07791900  |
| C  | 1.87464600  | -3.35303600 | 0.15537300  |
| H  | 2.49468300  | -3.85868700 | 0.90794000  |
| H  | 0.95757200  | -3.92612100 | 0.02139400  |
| H  | 2.42061100  | -3.37459700 | -0.78965500 |
| C  | 2.95048300  | -1.16041700 | 0.56443300  |
| C  | 3.57107500  | -0.86543400 | -0.66303900 |
| C  | 3.68594300  | -0.90575300 | 1.73270300  |
| C  | 4.83798300  | -0.28971900 | -0.72381800 |
| H  | 3.04280300  | -1.08047200 | -1.58663400 |
| C  | 4.95011700  | -0.31018100 | 1.68024400  |
| H  | 3.28788000  | -1.18866600 | 2.69857400  |
| C  | 5.52958300  | 0.01059200  | 0.45360400  |
| H  | 5.28059900  | -0.06930200 | -1.69056600 |
| H  | 5.48405300  | -0.11193800 | 2.60506700  |
| H  | 6.51065800  | 0.47368800  | 0.41188700  |
| C  | -0.01235100 | -2.91464100 | 2.30278200  |
| H  | -0.80806100 | -2.62209700 | 2.99265200  |
| H  | -0.42679500 | -3.60471600 | 1.56945900  |
| H  | 0.76199300  | -3.43650700 | 2.87434700  |
| C  | 0.68951600  | 2.68281900  | -2.64437900 |
| H  | 0.62609900  | 3.74819900  | -2.39626100 |
| H  | 0.78315000  | 2.60612300  | -3.73159100 |
| H  | -0.25417100 | 2.21513500  | -2.35256300 |
| H  | 1.93502300  | 0.97069500  | -2.30126100 |
| C  | 3.20881200  | 2.68821000  | -2.32408200 |
| H  | 4.05540200  | 2.19052600  | -1.84148500 |
| H  | 3.36516300  | 2.65512300  | -3.40650600 |
| H  | 3.21833400  | 3.74246500  | -2.02491100 |

## O

|    |             |             |             |
|----|-------------|-------------|-------------|
| N  | -0.24270100 | 1.19892000  | 0.03217200  |
| P  | -2.13086000 | -0.72091500 | 0.54767900  |
| Ir | -0.04534800 | -1.05567200 | -0.31739100 |
| H  | -0.64148800 | -1.51214300 | -1.24166700 |
| H  | -2.17172500 | -1.61220900 | -0.46114900 |
| H  | -1.88411300 | -1.91205800 | 0.97166200  |
| C  | -1.10354100 | 3.37354100  | 0.02658300  |
| H  | -1.21142300 | 4.24219700  | 0.67447800  |
| H  | -1.73747600 | 3.48049500  | -0.85776800 |
| C  | 0.62567800  | 2.02819000  | -0.44298000 |
| O  | 0.28889700  | 3.32486000  | -0.42871800 |
| C  | -1.28287600 | 2.01598400  | 0.71601600  |
| H  | -2.26691200 | 1.60249600  | 0.50261900  |
| C  | -1.03477500 | 2.02565600  | 2.24420900  |
| C  | 2.01259800  | 1.64289800  | -0.94318400 |
| H  | 1.84697300  | 1.03993100  | -1.84221700 |
| C  | 2.88582900  | 2.84565800  | -1.37561300 |
| N  | 2.70430400  | 0.80685500  | 0.04505600  |
| H  | 3.20555400  | 1.33960200  | 0.74493600  |
| C  | 2.20641600  | -0.63496500 | 2.37846500  |
| H  | 2.01683000  | -1.62679800 | 2.79423800  |

|    |             |             |             |   |             |             |             |
|----|-------------|-------------|-------------|---|-------------|-------------|-------------|
| H  | 3.17918200  | -0.27857800 | 2.72730600  | C | 2.21088500  | 0.95990300  | -1.14465400 |
| H  | 1.42396000  | 0.04395100  | 2.72092400  | O | 3.04135600  | 1.92414700  | -1.56522000 |
| C  | 3.45319800  | -1.94459300 | 0.02923600  | C | 1.22443900  | 2.81093600  | -0.38247800 |
| C  | 3.08040600  | -3.34106300 | 0.55988100  | H | 0.28864500  | 3.30536500  | -0.64191600 |
| H  | 2.08780800  | -3.65090000 | 0.21846800  | C | 1.56302100  | 3.10482300  | 1.09988500  |
| H  | 3.80735700  | -4.07204400 | 0.18940800  | C | 2.67482500  | -0.48795100 | -1.26019000 |
| H  | 3.10004400  | -3.38494000 | 1.65337900  | H | 1.93857200  | -0.98544200 | -1.89961400 |
| C  | 3.49411000  | -1.95685100 | -1.51058300 | C | 4.04963100  | -0.66338700 | -1.94993900 |
| H  | 4.28323600  | -2.63847900 | -1.84601100 | N | 2.65180200  | -1.13992400 | 0.05393600  |
| H  | 2.54749500  | -2.30361500 | -1.93529300 | H | 3.50974600  | -1.02968900 | 0.57957300  |
| H  | 3.71779900  | -0.96338800 | -1.91273000 | C | 1.69300600  | -0.78378000 | 2.64776500  |
| C  | 4.82332000  | -1.50513700 | 0.57925500  | H | 0.89665600  | -1.04048400 | 3.34942600  |
| H  | 5.59513900  | -2.19114100 | 0.21396100  | H | 2.62906000  | -1.23719300 | 2.98426400  |
| H  | 5.08244900  | -0.49710200 | 0.24128600  | H | 1.80154000  | 0.30078100  | 2.62584800  |
| H  | 4.85605100  | -1.52812100 | 1.67271200  | C | 1.00474900  | -3.21660000 | 1.10962600  |
| H  | -0.23536600 | -0.85196100 | -1.94410100 | C | -0.17068700 | -3.51813300 | 2.05761500  |
| H  | 0.73628500  | -0.73094100 | -1.73840300 | H | -1.09228800 | -3.02679300 | 1.73082900  |
| H  | 0.25328600  | -2.56600900 | -0.61975500 | H | -0.35235100 | -4.59841900 | 2.06979800  |
| C  | -2.57761000 | -1.10755800 | 2.07499600  | H | 0.04015000  | -3.21078600 | 3.08647100  |
| H  | -2.77627300 | -0.07984500 | 1.78695800  | C | 0.69393500  | -3.75565400 | -0.30008400 |
| H  | -3.53697400 | -1.58517900 | 2.29489600  | H | 0.61242300  | -4.84722800 | -0.25960800 |
| H  | -1.98654000 | -1.11983300 | 2.99397500  | H | -0.25356300 | -3.36233900 | -0.67992000 |
| C  | -2.41862500 | -2.80184300 | -1.39811100 | H | 1.48905200  | -3.50726500 | -1.01090400 |
| H  | -1.68257500 | -3.59800900 | -1.28897200 | C | 2.29911900  | -3.86445400 | 1.63635700  |
| H  | -3.41629000 | -3.22183500 | -1.21222000 | H | 2.17774400  | -4.95301500 | 1.64856200  |
| H  | -2.39133800 | -2.45931100 | -2.43499900 | H | 3.15256100  | -3.62857000 | 0.99365500  |
| C  | 0.25482000  | 2.74851300  | 2.66064700  | H | 2.53243900  | -3.55074900 | 2.65833000  |
| H  | 1.13418700  | 2.34659700  | 2.15012500  | H | -0.76000000 | -0.47280700 | -1.67242500 |
| H  | 0.20708900  | 3.82283300  | 2.45544100  | H | -0.09153000 | -1.09397200 | -1.36301100 |
| H  | 0.41662000  | 2.62838100  | 3.73596600  | H | -1.52532900 | -1.35149300 | 0.31356600  |
| C  | -3.14564800 | -0.50292900 | -0.81508800 | C | -2.98385200 | 0.32100300  | 2.15051600  |
| C  | -2.84088700 | 0.49020300  | -1.75922900 | H | -3.94446100 | 0.81985900  | 2.30707600  |
| C  | -4.45324900 | -0.52980700 | -0.29941200 | H | -3.17456900 | -0.69189200 | 1.79869400  |
| C  | -3.78203400 | 1.45170000  | -2.13175800 | H | -2.46442600 | 0.27219400  | 3.11125000  |
| H  | -1.84450000 | 0.53195100  | -2.18366500 | C | -2.32050600 | 2.14369400  | -1.24350900 |
| C  | -5.39623400 | 0.43357400  | -0.66162000 | H | -3.14321400 | 2.85051000  | -1.07461300 |
| H  | -4.74238100 | -1.31637700 | 0.38963200  | H | -1.38421300 | 2.68654800  | -1.13542800 |
| C  | -5.06196100 | 1.43618900  | -1.57399500 | H | -2.38429900 | 1.80120800  | -2.27873900 |
| H  | -3.51005600 | 2.21457200  | -2.85567400 | C | -3.68058200 | 0.14511200  | -0.66957300 |
| H  | -6.39379300 | 0.39457900  | -0.23383400 | C | -3.68161600 | -1.05712600 | -1.38740100 |
| H  | -5.79237100 | 2.18918700  | -1.85407400 | C | -4.92498900 | 0.71548500  | -0.34303800 |
| C  | -1.75526600 | -3.38184300 | 1.38334200  | C | -4.87959900 | -1.68173100 | -1.74639700 |
| H  | -1.08846000 | -3.94532900 | 0.73378200  | H | -2.74065100 | -1.51853400 | -1.66136200 |
| H  | -1.38387200 | -3.45814900 | 2.40874500  | C | -6.12272200 | 0.09361900  | -0.69339400 |
| H  | -2.75073200 | -3.83683100 | 1.34593700  | H | -4.95559600 | 1.66123300  | 0.19187500  |
| C  | -2.25370800 | 2.61037300  | 2.97121100  | C | -6.10474600 | -1.11383700 | -1.39645000 |
| H  | -3.17073700 | 2.06355800  | 2.72793200  | H | -4.84961100 | -2.61589300 | -2.30061000 |
| H  | -2.11125800 | 2.56829100  | 4.05499600  | H | -7.06804800 | 0.55347300  | -0.41994900 |
| H  | -2.40996200 | 3.66084600  | 2.70009800  | H | -7.03483100 | -1.60227800 | -1.67150300 |
| H  | -0.92748100 | 0.97466000  | 2.53608200  | C | -1.90025200 | 2.54810400  | 1.64265800  |
| C  | 3.34719000  | 3.72687300  | -0.20281100 | H | -1.47559700 | 2.54221700  | 2.64928700  |
| H  | 3.82199500  | 4.63308400  | -0.58959500 | H | -1.24710100 | 3.11912800  | 0.98906400  |
| H  | 2.51454500  | 4.02965300  | 0.43652600  | H | -2.86534200 | 3.06485400  | 1.68383700  |
| H  | 4.09854600  | 3.21954300  | 0.41370300  | C | 5.23547900  | -0.17329900 | -1.10168700 |
| C  | 4.08523900  | 2.35239300  | -2.19685400 | H | 6.15122500  | -0.20596600 | -1.69892200 |
| H  | 4.72318000  | 1.69618100  | -1.59668700 | H | 5.09582200  | 0.85214000  | -0.75280300 |
| H  | 3.76289800  | 1.79481300  | -3.08281600 | H | 5.40610200  | -0.82077800 | -0.23347000 |
| H  | 4.69010000  | 3.19968800  | -2.53274400 | H | 4.00684200  | -0.04951200 | -2.85677000 |
| H  | 2.24680000  | 3.45530700  | -2.02420000 | C | 4.24217500  | -2.12983600 | -2.36191300 |
|    |             |             |             | H | 4.24776400  | -2.78304500 | -1.48355500 |
|    |             |             |             | H | 3.44333300  | -2.46719600 | -3.03095000 |
|    |             |             |             | H | 5.19526600  | -2.25554300 | -2.88404000 |
|    |             |             |             | C | 2.96728700  | 2.64016700  | 1.51434600  |
|    |             |             |             | H | 3.13938200  | 1.58596100  | 1.28260200  |
|    |             |             |             | H | 3.75186200  | 3.22523000  | 1.02396400  |
|    |             |             |             | H | 3.09510300  | 2.76537500  | 2.59368100  |
|    |             |             |             | H | 0.83770500  | 2.53172100  | 1.68960300  |
|    |             |             |             | C | 1.36598000  | 4.59612100  | 1.40408400  |
|    |             |             |             | H | 0.34552200  | 4.92324200  | 1.17903300  |
|    |             |             |             | H | 1.56076100  | 4.80072400  | 2.46081400  |
|    |             |             |             | H | 2.05357500  | 5.21481000  | 0.81617500  |
| P  |             |             |             |   |             |             |             |
| N  | 1.10171200  | 1.34269100  | -0.60284300 |   |             |             |             |
| P  | 1.22796600  | -1.35743700 | 0.96825600  |   |             |             |             |
| Ix | -0.55447700 | -0.17856800 | -0.04391600 |   |             |             |             |
| H  | -0.94570200 | 0.59164100  | 1.43338600  |   |             |             |             |
| C  | -2.43564400 | 0.93896900  | -0.30642700 |   |             |             |             |
| C  | -2.16472600 | 1.13050900  | 1.14108000  |   |             |             |             |
| C  | 2.32269800  | 3.18547900  | -1.38681400 |   |             |             |             |
| H  | 3.03616500  | 3.93056000  | -1.03751900 |   |             |             |             |
| H  | 1.92363800  | 3.47799300  | -2.36171100 |   |             |             |             |

## Ir/4c with S83

## TSs for the $\sigma$ -methatesis pathway

### A

|    |             |             |             |
|----|-------------|-------------|-------------|
| N  | -1.27864900 | 0.62980500  | -1.22992600 |
| P  | -1.56791200 | -1.45532000 | 1.25690000  |
| Ir | 0.31516500  | -0.88390800 | -0.05459500 |
| H  | 0.29906300  | -1.56925600 | -1.57441600 |
| C  | 2.32837300  | 0.22206200  | 0.72130300  |
| C  | 2.33462300  | -0.22135900 | -0.69627200 |
| C  | -2.04309000 | 1.58510600  | -3.24606500 |
| H  | -1.55746900 | 1.09650800  | -4.09567900 |
| H  | -2.60274400 | 2.45261200  | -3.59177300 |
| C  | -2.40817100 | 0.11832900  | -1.59255600 |
| O  | -2.99765800 | 0.63988400  | -2.68077000 |
| C  | -1.07841100 | 1.84678100  | -2.07727000 |
| C  | -3.17748800 | -1.01019400 | -0.91092500 |
| N  | -3.04866600 | -0.96007200 | 0.54657300  |
| H  | -3.37347300 | -0.07321800 | 0.91579500  |
| C  | -1.75851100 | -3.27224100 | 1.39028000  |
| H  | -0.88183300 | -3.68946200 | 1.89180300  |
| H  | -2.67036700 | -3.54145700 | 1.92540200  |
| H  | -1.79754000 | -3.68615700 | 0.37970600  |
| C  | -1.70538200 | -0.76824800 | 2.99746500  |
| C  | -0.43425700 | -1.17864000 | 3.76551600  |
| H  | 0.47166800  | -0.80194200 | 3.28441000  |
| H  | -0.47699800 | -0.76487800 | 4.77827300  |
| H  | -0.34163900 | -2.26517100 | 3.85483700  |
| C  | -1.79581600 | 0.76886300  | 2.91236300  |
| H  | -1.67271800 | 1.19356500  | 3.91398100  |
| H  | -1.02234700 | 1.19200900  | 2.26808800  |
| H  | -2.76757000 | 1.11027700  | 2.54085700  |
| C  | -2.95315900 | -1.32378300 | 3.71256900  |
| C  | -3.05236300 | -0.82920000 | 4.68478500  |
| H  | -3.86828200 | -1.13725700 | 3.14383100  |
| H  | -2.87467800 | -2.39824100 | 3.89748200  |
| H  | 1.04958700  | 0.01985600  | 1.20074500  |
| H  | 1.06389400  | -2.10766700 | 0.54633100  |
| C  | -4.67266300 | -1.07104500 | -1.32422800 |
| H  | -4.69053000 | -1.05456900 | -2.41878500 |
| C  | -5.47236200 | 0.13583200  | -0.81126000 |
| H  | -6.49628200 | 0.09549800  | -1.19406500 |
| H  | -5.53697900 | 0.13372400  | 0.28268300  |
| H  | -5.03119200 | 1.08276800  | -1.13415000 |
| C  | -5.29060200 | -2.35168500 | -0.84717100 |
| H  | -6.33560600 | -2.45692900 | -1.16459400 |
| H  | -4.75815500 | -3.25661500 | -1.26033500 |
| H  | -5.25788000 | -2.46334100 | 0.24387700  |
| H  | -2.72099800 | -1.94534400 | -1.25875100 |
| C  | -1.35809500 | 3.16040000  | -1.28287500 |
| C  | -2.81217000 | 3.21391200  | -0.77916100 |
| H  | -3.53966700 | 3.17572600  | -1.59591700 |
| H  | -3.02221500 | 2.38708000  | -0.09357200 |
| C  | -2.98170800 | 4.14570800  | -0.23109700 |
| C  | -1.07861600 | 4.35888900  | -2.20996500 |
| H  | -1.19367500 | 5.29422900  | -1.65304400 |
| H  | -0.05514300 | 4.32475000  | -2.60003600 |
| H  | -1.76516200 | 4.40056500  | -3.06179200 |
| H  | -0.05186600 | 1.87189500  | -2.43538400 |
| C  | -0.41004100 | 3.23264200  | -0.07799000 |
| H  | -0.51348700 | 2.34970500  | 0.55293100  |
| H  | 0.63668600  | 3.30171500  | -0.38621100 |
| H  | -0.63035700 | 4.11485000  | 0.53098100  |
| C  | 3.09321100  | -0.60269000 | 1.73658400  |
| C  | 3.02135300  | -1.70261900 | 1.50666000  |
| H  | 4.14565400  | -0.34560900 | 1.71117700  |
| H  | 2.72320000  | -0.46184800 | 2.74846100  |
| H  | -0.44307100 | -1.95189900 | -1.09491500 |
| C  | 2.24785100  | 0.81939500  | -1.81263700 |
| H  | 3.24371600  | 1.16763800  | -2.10896200 |
| H  | 1.79040700  | 0.37360000  | -2.69890400 |
| H  | 1.66744000  | 1.68959200  | -1.51309000 |
| C  | 2.43241800  | 1.68703700  | 1.11260600  |
| C  | 3.36174200  | 2.52803300  | 0.48669500  |
| C  | 1.72501800  | 2.17753300  | 2.21851900  |
| C  | 3.53725100  | 3.84275100  | 0.92494300  |
| C  | 3.95931400  | 2.16442800  | -0.33965200 |
| C  | 1.89517100  | 3.48888400  | 2.65616600  |
| H  | 1.02860300  | 1.53024800  | 2.74132600  |
| C  | 2.79720200  | 4.33172900  | 2.00201500  |
| H  | 4.25611700  | 4.48156800  | 0.42105700  |
| H  | 1.32332700  | 3.85078700  | 3.50505400  |
| H  | 2.92847200  | 5.35647600  | 2.33548700  |
| C  | 3.33817000  | -1.30199100 | -1.06595400 |
| C  | 3.00737500  | -2.57485700 | -1.54523500 |
| C  | 4.70222100  | -0.96178600 | -0.99716800 |
| C  | 3.99991300  | -3.48102200 | -1.93142700 |
| H  | 1.96796200  | -2.87258100 | -1.60876700 |
| C  | 5.69610200  | -1.86320800 | -1.37385400 |
| C  | 4.98937200  | 0.02413400  | -0.64157400 |
| C  | 5.34730300  | -3.13234600 | -1.84354700 |
| H  | 3.71310800  | -4.46251100 | -2.29782400 |
| H  | 6.74046300  | -1.57350100 | -1.30289200 |
| H  | 6.11755100  | -3.83856100 | -2.13865100 |

### B

|    |             |             |             |
|----|-------------|-------------|-------------|
| N  | -1.14100700 | 1.05336500  | 0.32431700  |
| P  | -1.44140500 | -2.03370300 | -0.55887100 |
| Ir | 0.35863300  | -0.57438500 | -0.47901600 |
| H  | 0.94393900  | 0.48317300  | -1.62622500 |
| C  | 2.43323400  | 0.06643700  | 0.24702300  |
| C  | 2.25791700  | 0.80251700  | -1.00042300 |
| C  | -1.91611000 | 3.26177400  | 0.53514600  |
| H  | -1.37990900 | 3.89429900  | -0.17474300 |
| H  | -2.51735600 | 3.87694200  | 1.20077400  |
| O  | -2.24286900 | 1.22261100  | -0.32785000 |
| C  | -2.83355300 | 2.41962300  | -0.22787100 |
| H  | -1.00184700 | 2.23919300  | 1.23039900  |
| C  | -2.94938200 | 0.20104900  | -1.20118800 |
| N  | -2.87232800 | -1.12111500 | -0.55785300 |
| H  | -3.70213500 | -1.67590300 | -0.73523300 |

|   |             |             |             |
|---|-------------|-------------|-------------|
| C | -1.37685600 | -3.00037600 | -2.11824800 |
| H | -0.41267900 | -3.50667500 | -2.19442000 |
| H | -2.18502700 | -3.73269900 | -2.17502600 |
| H | -1.46482500 | -2.29485800 | -2.94702700 |
| C | -1.69763600 | -3.28927600 | 0.80914200  |
| C | -0.57477600 | -4.33971100 | 0.71112700  |
| H | 0.41539800  | -3.87704500 | 0.74436400  |
| H | -0.65341400 | -5.02259000 | 1.56324800  |
| H | -0.64721600 | -4.93918900 | -0.20063300 |
| C | -1.65436900 | -2.59063800 | 2.17797000  |
| H | -1.92595900 | -3.31401000 | 2.95397100  |
| H | -0.65489100 | -2.21508500 | 2.40528600  |
| H | -2.35861400 | -1.75614200 | 2.22816600  |
| C | -3.07486200 | -3.96665500 | 0.63339600  |
| H | -3.16653100 | -4.76188800 | 1.38026200  |
| H | -3.89712200 | -3.26597300 | 0.80646300  |
| H | -3.20246600 | -4.42975700 | -0.34895700 |
| H | 0.50777700  | -1.26830400 | 0.97799100  |
| H | 1.20091300  | -1.72024900 | -1.12752900 |
| C | -4.42402200 | 0.57419000  | -1.50531300 |
| H | -4.39427500 | 1.60363400  | -1.87551200 |
| C | -5.32784300 | 0.53789100  | -0.26364200 |
| H | -6.33124500 | 0.88474200  | -0.52740400 |
| H | -5.42728200 | -0.47521300 | 0.13964300  |
| H | -4.94409600 | 1.18201300  | 0.53024200  |
| C | -4.97972000 | -0.30931600 | -2.63320900 |
| H | -5.98421500 | 0.02518800  | -2.90726800 |
| H | -4.34985400 | -0.26252800 | -3.52755100 |
| H | -5.06318900 | -1.36131200 | -2.33623200 |
| H | -2.41596000 | 0.21465900  | -2.16429500 |
| C | -1.42612600 | 1.92223700  | 2.70275600  |
| C | -2.89071800 | 1.44643500  | 2.76759500  |
| H | -3.58983900 | 2.19775300  | 2.38805600  |
| H | -3.03583100 | 0.52526900  | 2.19565900  |
| H | -3.16596600 | 1.23993700  | 3.80620600  |
| C | -1.25829600 | 3.20576700  | 3.54202000  |
| H | -1.44948700 | 2.98343700  | 4.59657900  |
| H | -0.23853900 | 3.59913700  | 3.46296800  |
| H | -1.95235000 | 3.99903900  | 3.24757700  |
| H | 0.03221600  | 2.58444600  | 1.21301700  |
| C | -0.52049300 | 0.83288700  | 3.30337600  |
| H | -0.44448900 | -0.03108200 | 2.64346800  |
| H | 0.48558800  | 1.21481000  | 3.48868300  |
| H | -0.92602500 | 0.49925800  | 4.26402300  |
| H | -0.30340000 | -0.26758300 | -1.95767400 |
| C | 3.00958200  | 0.34039000  | -2.25779200 |
| H | 4.01607500  | 0.76656600  | -2.24040700 |
| H | 3.08679300  | -0.74569300 | -2.30203100 |
| H | 2.50868700  | 0.70397200  | -3.15798900 |
| C | 2.08542600  | 2.30921800  | -0.96468400 |
| C | 0.98017000  | 2.96214400  | -1.52251100 |
| C | 3.14865400  | 3.08113400  | -0.47188100 |
| C | 0.92711900  | 4.35703500  | -1.56857200 |
| H | 0.15222200  | 2.38002700  | -1.91487200 |
| C | 3.09281000  | 4.47403100  | -0.51045800 |
| H | 4.02767800  | 2.59350900  | -0.06236900 |
| H | 1.97910300  | 5.11731400  | -1.05550900 |
| H | 0.06345600  | 4.84702600  | -2.00825100 |
| H | 3.92185700  | 5.05482900  | -0.11812300 |
| C | 2.39643900  | 0.81252800  | 1.57232500  |
| C | 3.38060200  | 1.25273300  | 1.76807100  |
| H | 1.66225500  | 1.61287200  | 1.58403700  |
| H | 2.17829800  | 0.11554300  | 2.38024300  |
| H | 1.93540900  | 6.20149700  | -1.08672900 |
| C | 3.46411400  | -1.04431100 | 0.30861600  |
| C | 3.18261200  | -2.35563700 | 0.70971000  |
| C | 4.80759200  | -0.69143100 | 0.09341800  |
| C | 4.20348300  | -3.29696800 | 0.85441900  |
| H | 2.15565100  | -2.63445300 | 0.90382100  |
| C | 5.82989100  | -1.63040200 | 0.23192700  |
| H | 5.06149800  | 0.32918100  | -0.17777400 |
| C | 5.53057500  | -2.94170000 | 0.60788000  |
| H | 3.95665900  | -4.30943200 | 1.16051000  |
| H | 6.85873300  | -1.33408800 | 0.05017400  |
| H | 6.32384900  | -3.67544200 | 0.71434700  |

### C

|    |             |             |             |
|----|-------------|-------------|-------------|
| N  | 0.75476800  | 1.11111400  | 0.59457300  |
| P  | 1.89380400  | -1.58741000 | -0.72908700 |
| Ir | -0.19927200 | -0.59550600 | -0.62205600 |
| H  | 0.01270700  | -1.52811600 | 0.69420200  |
| C  | -2.53105100 | 0.12526200  | -0.56730300 |
| C  | -2.12816400 | -0.67200200 | 0.58723300  |
| C  | 0.66364600  | 2.79276000  | 2.22594000  |
| H  | -0.21300400 | 2.63682700  | 2.86041600  |
| H  | 1.12122300  | 3.74980400  | 2.46663400  |
| H  | 1.52514700  | 0.82637300  | 1.58856200  |
| O  | 1.63405400  | 1.74909900  | 2.55339400  |
| C  | 0.38521900  | 2.55564900  | 0.73076800  |
| C  | 2.30512000  | -0.45999100 | 1.78511400  |
| N  | 2.85423900  | -0.90928700 | 0.49455300  |
| H  | 3.74925100  | -1.37094800 | 0.60761500  |
| C  | 1.76470800  | -3.39624400 | -0.43850500 |
| H  | 1.05958700  | -3.83025200 | -1.15052700 |
| H  | 2.73375400  | -3.89079800 | -0.52968000 |
| H  | 1.37890700  | -3.54720600 | 0.57173500  |
| C  | 2.91905300  | -1.39855700 | -2.28576100 |
| C  | 2.17850600  | -2.11424300 | -3.43279500 |
| H  | 1.16444100  | -1.72283400 | -3.55904500 |
| H  | 2.72476500  | -1.94523500 | -4.36653800 |
| H  | 2.11911100  | -3.19531300 | -3.27688000 |
| C  | 3.09193000  | 0.09187300  | -2.62051000 |
| H  | 3.78481200  | 0.18775800  | -3.46296600 |
| H  | 2.14584400  | 0.54725500  | -2.91757200 |
| H  | 3.49949200  | 0.65385900  | -1.77620800 |
| C  | 4.31316900  | -2.03102600 | -2.07557900 |
| H  | 4.87925700  | -1.93503000 | -3.00761400 |
| H  | 4.88590400  | -1.51506400 | -1.29853900 |
| H  | 4.26787100  | -3.09602800 | -1.83425500 |
| H  | -1.27157500 | 0.33176400  | -1.48231400 |
| H  | -0.76344500 | -1.82170700 | -1.42111100 |
| C  | 3.43454800  | -0.32503600 | 2.83912400  |
| H  | 2.95409300  | 0.09788600  | 3.72690900  |
| C  | 4.55732000  | 0.62859200  | 2.40131200  |
| H  | 5.28663700  | 0.73655300  |             |

|   |             |             |             |
|---|-------------|-------------|-------------|
| H | 4.52431000  | -2.18591100 | 2.39673700  |
| H | 1.57805600  | -1.18267900 | 2.18756200  |
| C | 1.21052700  | 3.48680100  | -0.21534900 |
| C | 2.71976500  | 3.39321100  | 0.07836400  |
| H | 2.96603600  | 3.68577300  | 1.10359900  |
| H | 3.09234900  | 2.37784000  | -0.08730300 |
| H | 3.26890700  | 4.06065300  | -0.59270300 |
| C | 0.71790000  | 4.93355200  | -0.00301200 |
| H | 1.21921300  | 5.60191900  | -0.71018000 |
| H | -0.36166000 | 5.00918900  | -0.17507700 |
| H | 0.93035000  | 5.30847600  | 1.00313200  |
| H | -0.67375300 | 2.67416000  | 0.49872600  |
| C | 0.96659900  | 3.10262800  | -1.68319800 |
| H | 1.21260300  | 2.05752000  | -1.86002900 |
| H | -0.07594200 | 3.26179300  | -1.96319500 |
| H | 1.58829600  | 3.72071200  | -2.33920400 |
| H | 0.28616700  | 0.05229500  | -2.03401700 |
| C | -3.35644600 | -0.55604000 | -1.66201100 |
| H | -4.40984400 | -0.51360700 | -1.36898800 |
| H | -3.25033800 | -0.02851300 | -2.61178600 |
| H | -3.07130500 | -1.59872000 | -1.79457600 |
| C | -1.90135600 | -0.02935900 | 1.95688000  |
| H | -1.50677100 | 0.98038700  | 1.88613800  |
| H | -2.84399500 | 0.01016000  | 2.51247400  |
| H | -1.21007300 | -0.63830100 | 2.54036600  |
| C | -2.78245700 | -2.03434600 | 0.74138000  |
| C | -2.12709800 | -3.26830700 | 0.68037600  |
| C | -4.15444800 | -2.02548800 | 1.05299800  |
| C | -2.82102300 | -4.45944800 | 0.91180900  |
| H | -1.07342600 | -3.29746700 | 0.43726200  |
| C | -4.84991700 | -3.21150300 | 1.28127600  |
| H | -4.68327900 | -1.07813100 | 1.11774700  |
| C | -4.18353900 | -4.43766300 | 1.20946800  |
| H | -2.29004000 | -5.40522100 | 0.85506400  |
| H | -5.90979400 | -3.17682100 | 1.51529500  |
| H | -4.72166000 | -5.36431000 | 1.38485400  |
| C | -2.85357300 | 1.60157600  | -0.46669800 |
| C | -2.52060800 | 2.46815000  | -1.52088500 |
| C | -3.62495400 | 2.10358000  | 0.58897900  |
| C | -2.89047000 | 3.81081200  | -1.49133800 |
| H | -1.95017400 | 2.08389500  | -2.36391400 |
| H | -3.99907800 | 3.44912300  | 0.62049800  |
| H | -3.95173500 | 1.44937000  | 1.38689300  |
| C | -3.62230100 | 4.31028800  | -0.41036100 |
| H | -2.60442400 | 4.46510400  | -2.30882700 |
| H | -4.58919000 | 3.81879400  | 1.45330300  |
| H | -3.90622800 | 5.35755200  | -0.38014500 |

## D

|   |             |             |             |
|---|-------------|-------------|-------------|
| N | -1.10194400 | 0.86657800  | 0.53847100  |
| I | -1.24880800 | -2.12461600 | -0.66053400 |
| P | 0.48044900  | -0.65380500 | -0.20951300 |
| H | -0.03162300 | -0.30423200 | -0.71591300 |
| C | 2.55711000  | 0.48128000  | 1.29481800  |
| C | 1.95297800  | 0.91945700  | -0.96162400 |
| C | -1.95383300 | 3.03372900  | 0.90258900  |
| H | -1.43695000 | 3.77122000  | 0.28637200  |
| H | -2.60878300 | 3.53297400  | 1.61390600  |
| C | -2.17294100 | 1.06637000  | -0.15148900 |
| O | -2.79877300 | 2.23679900  | 0.02014600  |
| C | -0.99770500 | 1.99264600  | 1.51474600  |
| C | -2.79485500 | 0.12745000  | -1.16937400 |
| N | -2.70360900 | -1.25980500 | -0.69190900 |
| H | -3.49932400 | -1.81543700 | -0.98294000 |
| C | -1.00078700 | -2.92379500 | -2.29290200 |
| H | -0.04105300 | -3.44475700 | -2.30241200 |
| H | -1.80563900 | -3.62405600 | -2.52510500 |
| H | -0.97284100 | -2.13515100 | -3.04714700 |
| C | -1.57442500 | -3.51183300 | 0.55940700  |
| C | -0.33330900 | -4.42421200 | 0.59760500  |
| H | 0.56759000  | -3.86571100 | 0.86663900  |
| H | -0.48814400 | -1.20163900 | 1.35298900  |
| H | -0.15766500 | -4.92513200 | -0.35893900 |
| C | -1.84391300 | -2.91988400 | 1.95302900  |
| H | -2.11763800 | -3.73101200 | 2.63562100  |
| H | -0.95997500 | -2.42764900 | 2.36338900  |
| C | -2.66442300 | -2.19826500 | 1.93117300  |
| C | -2.81347900 | -4.32148600 | 0.11351100  |
| H | -2.95994100 | -5.14429000 | 0.82072600  |
| H | -3.72737100 | -3.71924400 | 0.13135800  |
| H | -2.69955200 | -4.76383300 | -0.87928300 |
| H | 1.60430400  | -0.46035700 | 1.01180600  |
| H | 1.43890200  | -1.72161300 | -0.83749800 |
| C | -4.26754000 | 0.48926700  | -1.49429900 |
| C | -4.25671000 | 1.55287800  | -1.75096500 |
| C | -5.21016400 | 0.29336800  | -0.29674800 |
| H | -6.21622400 | 0.63405900  | -0.55813400 |
| H | -5.28471700 | -0.75944500 | -0.00586200 |
| H | -4.87492800 | 0.86174800  | 0.57403200  |
| C | -4.75675200 | -0.28059700 | -2.73098000 |
| H | -5.75279900 | 0.06988300  | -3.01586700 |
| H | -4.08789700 | -0.13515700 | -3.58566700 |
| H | -4.83958400 | -1.35839500 | -2.54823500 |
| H | -2.21783800 | 0.27428700  | -2.09577800 |
| C | -1.35637700 | 1.56681000  | 2.97154800  |
| C | -2.79672900 | 1.02655300  | 3.04906100  |
| H | -3.53877600 | 1.77637000  | 2.75610400  |
| H | -2.92360000 | 0.15110400  | 2.40550100  |
| H | -3.02668800 | 0.72287400  | 4.07489500  |
| C | -1.20282300 | 2.80031100  | 3.88460800  |
| H | -1.38420000 | 2.51509200  | 4.92557700  |
| H | -0.19011800 | 3.21484900  | 3.82242800  |
| H | -1.91077400 | 3.59777000  | 3.63859200  |
| C | 0.02016700  | 2.37713200  | 1.49780000  |
| C | -0.38479500 | 0.47905800  | 3.45955100  |
| H | -0.43017100 | -0.40425900 | 2.82461400  |
| H | 0.64735200  | 0.83997500  | 3.46735800  |
| H | -0.64012900 | 0.18138200  | 4.48167200  |
| H | 0.46573400  | -1.49138300 | 1.18835600  |
| C | 2.64291000  | 1.37782400  | 1.53570200  |
| H | 3.54667200  | 1.98824800  | 1.46233400  |
| H | 1.78891200  | 2.03903700  | 1.64514900  |
| H | 2.74131400  | 0.76557900  | 2.43425500  |
| C | 2.59267800  | 0.45306600  | -2.27264200 |
| H | 3.45156700  | 1.09635800  | -2.49870100 |
| H | 2.93805500  | -0.57892600 | -2.22316900 |
| H | 1.87778700  | 0.54699600  | -3.09024600 |
| C | 1.35471900  | 2.30050300  | -1.12230500 |
| C | 0.20380100  | 2.49822800  | -1.90417900 |
| C | 2.02750300  | 3.44134500  | -0.65638200 |

|   |             |             |             |
|---|-------------|-------------|-------------|
| C | -0.28656100 | 3.77464000  | -2.16851200 |
| H | -0.31160600 | 1.63197900  | -2.30185500 |
| C | 1.53261800  | 4.72431700  | -0.90712400 |
| H | 2.95978900  | 3.34390300  | -0.11442600 |
| C | 0.36905600  | 4.89819600  | -1.65602200 |
| H | -1.18628800 | 3.88971400  | -2.76537600 |
| H | 2.07016800  | 5.58655100  | -0.52420500 |
| H | -0.01629100 | 5.89458400  | -1.84920200 |
| C | 3.78743700  | -0.41128400 | 0.22099700  |
| C | 3.82392300  | -1.74531300 | 0.63849600  |
| C | 4.97716600  | 0.19792000  | -0.20793500 |
| C | 5.02157500  | -2.46424600 | 0.60666700  |
| H | 2.91588800  | -2.22949500 | 0.97864800  |
| C | 6.17138900  | -0.52047700 | -0.24247000 |
| C | 4.96780700  | 1.23803500  | -0.52147400 |
| C | 6.19693100  | -1.85751100 | 0.16264700  |
| H | 5.03045800  | -3.50082200 | 0.93005700  |
| H | 7.07980400  | -0.03514000 | -0.58623500 |
| H | 7.12575000  | -2.41899900 | 0.13471700  |

## TSs for the migratory insertion pathway

### E

|   |             |             |              |
|---|-------------|-------------|--------------|
| N | -1.26315100 | 0.58782600  | -1.22948400  |
| P | -1.55626100 | -1.40372900 | 1.34319200   |
| I | 0.30362900  | -0.88021600 | -0.01538200  |
| H | 0.26569700  | -1.64732600 | -1.50361000  |
| C | 2.32689700  | 0.23957600  | 0.70193700   |
| C | 2.32243000  | -0.26468900 | -0.69470600  |
| C | -2.03029200 | 1.48301600  | -3.27216000  |
| H | -1.53719400 | 0.97811600  | -4.10797800  |
| H | -2.59854500 | 2.33497800  | -3.64124100  |
| C | -2.38577200 | 0.05629900  | -1.58190000  |
| O | -2.97570900 | 0.54343000  | -2.68570900  |
| C | -1.07259000 | 1.78635700  | -2.10824200  |
| C | -3.12550800 | -1.09583500 | -0.91904700  |
| N | -3.00382800 | -1.00960100 | 0.53995700   |
| H | -3.83303700 | -1.36199000 | 1.00427500   |
| C | -1.61816800 | -3.20393100 | -1.71432800  |
| H | -0.73477200 | -3.49215600 | -2.28930100  |
| H | -2.52209900 | -3.47790300 | 2.26307600   |
| H | -1.59836500 | -3.74281800 | 0.76385700   |
| C | -1.74595600 | -0.53398600 | 2.99467100   |
| C | -0.50870000 | -0.85404500 | 3.85408400   |
| H | 0.42114800  | -0.58687900 | 3.34450500   |
| H | -0.55703900 | -0.28101700 | 4.78606200   |
| H | -0.45523200 | -1.91395800 | 4.12006800   |
| C | -1.84126000 | 0.97769500  | 2.72571400   |
| H | -1.91424900 | 1.51375200  | 3.67806800   |
| H | -0.96307400 | 1.34913400  | 2.19618400   |
| C | -2.72016000 | 1.21912700  | 2.12309700   |
| C | -3.02066000 | -1.00013500 | 3.72707500   |
| H | -3.09354900 | -0.46563600 | 4.68036700   |
| H | -3.92899300 | -0.76935000 | 3.16159000   |
| H | -3.00744300 | -2.06958100 | 3.95345700   |
| H | 1.04067900  | 0.07445700  | 1.19198600   |
| H | -1.05392400 | -2.06130800 | -0.629665700 |
| H | -4.62109600 | -1.16502600 | -1.33233900  |
| C | -4.62668600 | -1.14530400 | -2.42603500  |
| C | -5.43759900 | 0.03362800  | -0.82613500  |
| H | -6.46240400 | -0.03001100 | -1.20382400  |
| H | -5.49026800 | 0.05635200  | 0.26712500   |
| H | -5.00977500 | 0.98023800  | -1.16452800  |
| H | -5.24416100 | -2.49940800 | -0.89211400  |
| C | -6.25907800 | -2.58389300 | -1.29077200  |
| H | -4.66429800 | -3.35380700 | -1.25660100  |
| H | -5.32270800 | -2.58729300 | 0.19788900   |
| H | -2.65686700 | -2.01164200 | -1.31761000  |
| C | -1.36638900 | 3.12010700  | -1.35675900  |
| C | -2.81705900 | 3.16707600  | -0.84192700  |
| H | -3.54780600 | 3.09920800  | -1.65432100  |
| C | -3.01300800 | 2.35459700  | -0.13573200  |
| H | -2.99509000 | 4.11176800  | -0.31892300  |
| C | -1.11268000 | 4.29210200  | -2.32496000  |
| H | -1.23349000 | 5.24249700  | -1.79548000  |
| H | -0.09306900 | 4.25892800  | -2.72519700  |
| H | -1.80915300 | 4.29931300  | -3.16951600  |
| H | -0.04553600 | 1.81030500  | -2.46449400  |
| C | -0.40455200 | 3.24777000  | -0.16778500  |
| H | -0.48818800 | 2.38763100  | 0.49518400   |
| H | 0.63728300  | 3.31961300  | -0.49293600  |
| H | -0.62880300 | 4.14773500  | 0.41344500   |
| H | -0.46408800 | -1.99498500 | -1.01375400  |
| C | 2.23579000  | 0.72609300  | -1.85547300  |
| H | 1.67241200  | 1.61745200  | -1.58705700  |
| H | 3.23257200  | 1.04492200  | -2.18024000  |
| H | 1.75901800  | 0.24794100  | -2.71436400  |
| C | 3.08275700  | -0.58731600 | 1.75241000   |
| H | 3.00422600  | -1.65738200 | 1.56466500   |
| H | 4.13708900  | -0.30045700 | 1.71830700   |
| H | 2.71089200  | -0.36665600 | 2.75519300   |
| C | 3.31680200  | -1.36732100 | -1.02098200  |
| C | 2.97431500  | -2.65574700 | -1.44724500  |
| C | 4.68363300  | -1.03558600 | -0.96822500  |
| C | 3.95845000  | -3.58520600 | -1.79785800  |
| H | 1.93224200  | -2.94703800 | -1.49564600  |
| C | 5.66913200  | -1.96014300 | -1.30917200  |
| H | 4.97953600  | -0.03833100 | -0.65354700  |
| C | 5.30882300  | -3.24439300 | -1.72622600  |
| H | 3.66294600  | -4.57849300 | -2.12322600  |
| H | 6.71605600  | -1.67685500 | -1.25137200  |
| H | 6.07266400  | -3.96853600 | -1.99318700  |
| C | 2.44842400  | 1.71837000  | 1.03068300   |
| C | 1.76070000  | 2.26068700  | 2.12482200   |
| C | 3.37774600  | 2.52332500  | 0.35910800   |
| C | 1.94880400  | 3.58721500  | 2.50551200   |

**F**

|    |             |             |             |
|----|-------------|-------------|-------------|
| N  | -1.40549300 | 0.88100300  | 0.16830900  |
| P  | -1.03554100 | -2.29197500 | -0.26189600 |
| Ix | 0.40406100  | -0.48514500 | -0.77245400 |
| H  | 0.05730300  | 0.24727300  | -2.23169600 |
| C  | 2.36196800  | 0.15534700  | 0.43135200  |
| C  | 2.11843800  | 0.91475400  | -0.82623800 |
| C  | -2.43593600 | 2.94369900  | -0.27820400 |
| H  | -1.94685800 | 3.36739200  | -1.15834200 |
| H  | -3.11139300 | 3.67447500  | 0.16006800  |
| C  | -2.50629700 | 0.71883700  | -0.49264700 |
| O  | -3.24553000 | 1.81216300  | -0.72707200 |
| C  | -1.44304500 | 2.28944200  | 0.69397000  |
| C  | -3.05492900 | -0.56569000 | -1.09234700 |
| N  | -2.64250000 | -1.72490500 | -0.29873100 |
| H  | -3.33640700 | -2.46264300 | -0.32289300 |
| C  | -0.90717600 | -3.64616800 | -1.49914200 |
| H  | 0.12370700  | -4.00623900 | -1.53671300 |
| H  | -1.57835600 | -4.47799600 | -1.27226300 |
| H  | -1.16330700 | -3.23423100 | -2.47826800 |
| C  | -0.93433700 | -3.13417000 | 1.41561000  |
| C  | 0.37271600  | -3.94143000 | 1.50494800  |
| H  | 1.25156000  | -3.30232600 | 1.39017400  |
| H  | 0.43583600  | -4.40611200 | 2.49468500  |
| H  | 0.42224300  | -4.74228800 | 0.76165700  |
| C  | -0.94466900 | -2.04309600 | 2.49710700  |
| H  | -0.93732400 | -2.50901000 | 3.48837100  |
| H  | -0.05968400 | -1.40549300 | 2.41995700  |
| H  | -1.83364100 | -1.41238600 | 2.41876300  |
| C  | -2.14237500 | -4.07181400 | 1.61998600  |
| H  | -2.03997500 | -4.56994600 | 2.59001200  |
| H  | -3.08761600 | -3.52169900 | 1.63706500  |
| H  | -2.20099200 | -4.85472700 | 0.85800300  |
| H  | 1.38927800  | -0.75915800 | 0.59535800  |
| H  | 1.34726700  | -1.45762700 | -1.53609900 |
| C  | -4.60009900 | -0.53946300 | -1.26064600 |
| H  | -4.81841800 | 0.37938700  | -1.81292200 |
| C  | -5.35360100 | -0.48810000 | 0.07536500  |
| H  | -6.43213700 | -0.46580700 | -0.10669800 |
| H  | -5.13937800 | -1.36426400 | 0.69457000  |
| C  | -5.09133700 | 0.40368600  | 0.64771400  |
| C  | -5.06709800 | -1.72072200 | -2.12650500 |
| H  | -6.12968100 | -1.61002100 | -2.36039900 |
| H  | -4.51463000 | -1.77144100 | -3.07052200 |
| H  | -4.95388900 | -2.68486200 | -1.61701200 |
| H  | -2.65060600 | -0.60132700 | -2.11817600 |
| C  | -1.89082200 | -2.38816000 | 2.19105900  |
| C  | -3.28788500 | 1.77898800  | 2.40870200  |
| H  | -4.05233100 | 2.26050900  | 1.79177400  |
| H  | -3.29036100 | 0.70757200  | 2.18691800  |
| H  | -3.58638300 | 1.90011900  | 3.45440300  |
| C  | -1.90486500 | 3.88091100  | 2.58486800  |
| H  | -2.09723000 | 3.97654300  | 3.65820600  |
| H  | -0.93918300 | 4.35396200  | 2.37316100  |
| H  | -2.68213200 | 4.44912200  | 2.06532800  |
| C  | -0.45204700 | 2.73039200  | 0.59341300  |
| C  | -0.89128800 | 1.66705300  | 3.10843900  |
| H  | -0.70296700 | 0.64886200  | 2.76955200  |
| H  | 0.06030000  | 2.20305900  | 3.15534500  |
| H  | -1.28686600 | 1.61988800  | 4.12813100  |
| C  | 2.13726000  | 0.83456900  | 1.78451700  |
| H  | 1.32441700  | 1.55006200  | 1.72373100  |
| H  | -1.90564600 | 0.09305000  | 2.55218700  |
| H  | 3.03846400  | 1.36251800  | 2.09965300  |
| C  | 3.05518900  | 0.63389500  | -2.00745800 |
| H  | 4.00201900  | 1.16975000  | -1.86262900 |
| H  | 3.27969100  | -0.42644200 | -2.12366600 |
| H  | 2.60180600  | 0.99855100  | -2.93184300 |
| C  | -0.55138200 | -0.47746200 | -2.15244000 |
| C  | 1.80506600  | 2.39595300  | -0.78468400 |
| C  | 0.83709100  | 2.95981500  | -1.63153700 |
| C  | 2.59466800  | 3.27708200  | -0.02661700 |
| C  | 0.62907400  | 4.33818900  | -1.68357000 |
| H  | 0.22122300  | 2.30780800  | -2.24174700 |
| C  | 2.37807000  | 4.65615900  | -0.05900500 |
| H  | 3.39821800  | 2.89035100  | 0.58935800  |
| H  | 1.38744000  | 5.19384400  | -0.88185600 |
| H  | -0.13176400 | 4.74172600  | -2.34547300 |
| H  | -2.99487300 | 5.30869900  | 0.55222600  |
| H  | 1.21765200  | 6.26576500  | -0.90906400 |
| C  | 3.57170100  | -0.77182500 | 0.43835100  |
| C  | 3.51249300  | -2.14336500 | 0.17325000  |
| C  | 4.82121400  | -0.19017000 | 0.70478100  |
| C  | 4.67037500  | -2.92508400 | 0.19831700  |
| H  | 2.56186900  | -2.60312500 | -0.06322700 |
| C  | 5.97842500  | -0.96779800 | 0.71903400  |
| H  | 4.89764500  | 0.87713900  | 0.88932600  |
| C  | 5.90728000  | -2.34117300 | 0.47069200  |
| H  | 4.59977500  | -3.98979600 | -0.00289800 |
| H  | 6.93605800  | -0.49831000 | 0.92277900  |
| H  | 6.80815400  | -2.94683700 | 0.48509600  |

**G**

|    |             |             |             |
|----|-------------|-------------|-------------|
| N  | 0.86660900  | 1.07799800  | 0.50121800  |
| P  | 1.55789100  | -1.86625100 | -0.61786500 |
| Ix | -0.28057100 | -0.40447900 | -0.83940500 |
| H  | -0.96064100 | -1.13306000 | 0.53127300  |
| C  | -2.32916700 | 0.42834300  | -0.50808300 |
| C  | -2.13397700 | -0.45411500 | 0.67012200  |
| C  | 0.99470700  | 2.80131700  | 2.09263400  |
| H  | 0.05512100  | 2.87216100  | 2.64744400  |
| H  | 1.63419200  | 3.64260300  | 2.35150200  |
| C  | 1.46708200  | 0.67257100  | 1.56968900  |
| O  | 1.67504500  | 1.58381100  | 2.52832200  |
| C  | 0.79056000  | 2.57110700  | 0.58608300  |
| C  | 1.93569100  | -0.74061500 | 1.87164200  |
| N  | 2.54353900  | -1.32743600 | 0.66659200  |
| H  | 3.27419000  | -1.98710400 | 0.91025400  |
| C  | 1.04958900  | -3.58432900 | -0.19671900 |
| H  | 0.38658900  | -3.97964500 | -0.96974000 |
| H  | 1.91097200  | -4.24576800 | -0.08217900 |
| H  | 0.50369300  | -3.55125200 | 0.74924500  |
| C  | 2.76495000  | -2.04289400 | -2.04451200 |
| C  | 2.01985200  | -2.71374500 | -3.21492000 |
| H  | 1.11661600  | -2.15877600 | -3.48961500 |
| H  | 2.67752200  | -2.73972600 | -4.09012900 |
| H  | 1.73552400  | -3.74470200 | -2.98504800 |
| C  | 3.25666500  | -0.64655300 | -2.46511400 |

|   |             |             |             |
|---|-------------|-------------|-------------|
| H | 4.04171800  | -0.75517800 | -3.22080000 |
| H | 2.45848700  | -0.05189800 | -2.91630300 |
| C | 3.67026300  | -0.09069600 | -1.61930800 |
| C | 3.98462600  | -2.89309500 | -1.62967600 |
| H | 4.64342800  | -3.00628600 | -2.49700700 |
| H | 4.56980000  | -2.40675100 | -0.84293000 |
| H | 3.71233600  | -3.89882800 | -1.28829100 |
| H | -0.25953400 | 0.57818100  | -2.19944800 |
| H | -0.99817100 | -1.48550600 | -1.72383300 |
| C | 2.92087600  | -0.80592000 | 3.06769300  |
| H | 2.43385800  | -0.25975200 | 3.88158500  |
| C | 4.26703200  | -0.12713000 | 2.77041100  |
| H | 4.89479100  | -0.14101600 | 3.66621100  |
| H | 4.81506000  | -0.64313700 | 1.97554100  |
| H | 4.13277900  | 0.91398700  | 2.46725400  |
| C | 3.11054600  | -2.25813500 | 3.53334600  |
| H | 3.72230100  | -2.28068800 | 4.43960400  |
| H | 2.15164900  | -2.73582400 | 3.75954800  |
| H | 3.62529100  | -2.87385700 | 2.78643300  |
| H | 1.03088300  | -1.28996000 | 2.17937800  |
| C | 1.84715700  | 3.28421100  | -0.31399300 |
| C | 3.28534400  | 2.93597900  | 0.11419500  |
| H | 3.51090400  | 3.26455500  | 1.13346700  |
| H | 3.46465100  | 1.85772400  | 0.05408000  |
| H | 3.99989100  | 3.42799800  | -0.55288500 |
| C | 1.60816200  | 4.80375000  | -0.19813400 |
| H | 2.30084600  | 5.34084300  | -0.85364200 |
| H | 0.58672700  | 5.06277800  | -0.49730800 |
| H | 1.76876800  | 5.17570200  | 0.81880400  |
| H | -0.20154500 | 2.88894700  | 0.27592400  |
| C | 1.65910400  | 2.87009100  | -1.78281300 |
| H | 1.89373000  | 1.81513000  | -1.92058200 |
| H | 0.63562300  | 3.05042900  | -2.12119200 |
| H | 2.33323000  | 3.44862200  | -2.42254500 |
| H | 0.53982200  | 0.10657800  | -2.20956100 |
| C | -3.04086900 | -1.67494200 | 0.75747300  |
| C | -2.64513100 | -2.96602300 | 0.40315300  |
| C | -4.34893100 | -1.46721000 | 1.22135900  |
| C | -3.53320400 | -4.03848300 | 0.51797300  |
| H | -1.64788000 | -3.12982600 | 0.01506400  |
| C | -5.23667500 | -2.53627000 | 1.33358800  |
| H | -4.67939600 | -0.46564300 | 1.48175200  |
| C | -4.83066000 | -3.82777000 | 0.98502900  |
| H | -3.20734900 | -5.03573500 | 0.23782400  |
| H | -6.24674700 | -2.35912500 | 1.69042200  |
| C | -3.31608400 | -0.06279000 | -1.57518000 |
| H | -3.24750700 | -1.13706700 | -1.74382100 |
| H | -4.34215900 | 0.16961200  | -1.26256700 |
| H | -3.13173000 | 0.44743600  | -2.52227200 |
| H | -5.52239500 | -4.65980800 | 1.07319100  |
| C | -2.42382200 | 1.93219500  | -0.38468100 |
| C | -2.01174600 | 2.73668500  | -1.46311300 |
| C | -3.03329800 | 2.57795900  | 0.70246400  |
| C | -2.13736400 | 4.12305200  | -1.43302000 |
| H | -1.56335400 | 2.26419700  | -2.33118800 |
| C | -3.14721500 | 3.97129400  | 0.74682800  |
| H | -3.44124100 | 2.00252600  | 1.52288400  |
| C | -2.68930400 | 4.75261500  | -0.31281900 |
| H | -1.79181000 | 4.71158500  | -2.27753500 |
| H | -3.60752600 | 4.43971900  | 1.61177500  |
| H | -2.77317300 | 5.83428400  | -0.27609900 |
| C | -1.82876700 | 0.11466600  | 2.06334400  |
| H | -1.25353700 | 1.03480900  | 2.01268500  |
| H | -2.76131500 | 0.31681000  | 2.59312800  |
| H | -1.27940600 | -0.62169900 | 2.65497300  |

**H**

|    |             |             |             |
|----|-------------|-------------|-------------|
| N  | -1.04387700 | 0.79632100  | 0.84179300  |
| P  | -1.32633800 | -1.81301300 | -1.03281800 |
| Ix | 0.47822400  | -0.73024100 | 0.01157900  |
| H  | 0.70740100  | 0.184466700 | -1.39045000 |
| C  | 2.41023400  | 0.35697400  | 0.22221900  |
| C  | 1.96492600  | 0.75353800  | -1.13319200 |
| C  | -1.66393700 | 2.94534900  | 1.53256300  |
| H  | -0.98126100 | 3.65345900  | 1.05385500  |
| H  | -2.28856900 | 3.45901400  | 2.26037900  |
| C  | -2.03416800 | 1.23384500  | 0.13682900  |
| O  | -2.54341000 | 2.42143300  | 0.49029800  |
| C  | -0.95150900 | 1.68502700  | 2.04313000  |
| C  | -2.68870400 | 0.57521800  | -1.06836200 |
| N  | -2.74499800 | -0.88034600 | -0.88558900 |
| H  | -3.54168800 | -1.27846700 | -1.37019000 |
| C  | -0.99904400 | -2.05151800 | -2.82814800 |
| H  | -0.10301000 | -2.66398500 | -2.95383000 |
| H  | -1.84105900 | -2.51434400 | -3.34724400 |
| H  | -0.80262500 | -1.06971800 | -3.26572500 |
| C  | -1.85272000 | -3.49016800 | -0.37255300 |
| C  | -0.64078000 | -4.43896000 | -0.45700900 |
| H  | 0.21336900  | -4.05334500 | 0.10790500  |
| H  | -0.91720200 | -5.40981900 | -0.03242000 |
| H  | -0.32123100 | -4.60940000 | -1.48950800 |
| C  | -2.29761700 | -3.33300700 | 1.09339700  |
| H  | -2.64489100 | -4.30219500 | 1.46652600  |
| H  | -1.47498200 | -3.01330700 | 1.73894600  |
| H  | -3.11329900 | -2.61231100 | 1.19264400  |
| C  | -3.02549400 | -4.06144600 | -1.19750500 |
| H  | -3.29927000 | -5.03970000 | -0.78835900 |
| H  | -3.91975200 | -3.43190600 | -1.14117800 |
| H  | -2.76652800 | -4.20991200 | -2.24896200 |
| H  | 0.83116300  | -1.25400600 | 1.56553200  |
| H  | 1.39971500  | -1.84527100 | -0.59705200 |
| C  | -4.10284600 | 1.14567700  | -1.36559200 |
| H  | -3.97805900 | 2.23174800  | -1.41272800 |
| C  | -5.12278400 | 0.82406100  | -0.26399900 |
| H  | -6.08943600 | 1.27240200  | -0.51171500 |
| H  | -5.27487700 | -0.25456000 | -0.15718000 |
| H  | -4.80434300 | 1.21977800  | 0.7027800   |

|   |             |             |             |
|---|-------------|-------------|-------------|
| H | -1.83806000 | 2.98881900  | 4.33864800  |
| H | 0.09406800  | 1.88747100  | 2.25589500  |
| C | -0.87603600 | -0.28222700 | 3.64095000  |
| H | -1.13848800 | -1.04377100 | 2.90565800  |
| H | 0.21411400  | -0.17062800 | 3.65696900  |
| H | -1.19128500 | -0.64658700 | 4.62370000  |
| C | 2.65063600  | 0.13446600  | -2.35805300 |
| H | 3.57920800  | 0.67608100  | -2.55632300 |
| H | 2.88548500  | -0.91667000 | -2.19259200 |
| H | 2.01082500  | 0.22898200  | -3.23885200 |
| H | 0.12189100  | -1.78399300 | 1.26976800  |
| C | 2.41867800  | 1.42110200  | 1.31851500  |
| H | 3.36318500  | 1.97774700  | 1.30549200  |
| H | 1.61528500  | 2.14390000  | 1.19195700  |
| H | 2.32996100  | 0.95097300  | 2.30084100  |
| C | 3.65226500  | -0.51105400 | 0.34196500  |
| C | 3.68547000  | -1.76100700 | 0.97415600  |
| C | 4.87254800  | 0.02631600  | -0.10606700 |
| C | 4.88549200  | -2.45984900 | 1.13075900  |
| H | 2.76689400  | -2.20240500 | 1.34076800  |
| C | 6.07178700  | -0.67023400 | 0.03857800  |
| H | 4.88624100  | 1.00707800  | -0.57277700 |
| C | 6.08271500  | -1.92266900 | 0.65716600  |
| H | 4.87862400  | -3.42842800 | 1.62239600  |
| H | 6.98572000  | -0.23215700 | -0.32760500 |
| H | 7.01369600  | -2.46955900 | 0.77268600  |
| C | 1.59870000  | 2.20920800  | -1.36506400 |
| C | 0.32475100  | 2.62494200  | -1.75470200 |
| C | 2.61240400  | 3.17253300  | -1.24706500 |
| C | 0.04412000  | 3.97372500  | -1.98117000 |
| H | -0.45195600 | 1.88462700  | -1.88759400 |
| C | 2.34051900  | 4.52000200  | -1.48062500 |
| H | 3.61547100  | 2.87199800  | -0.96205200 |
| C | 1.05200400  | 4.92790400  | -1.83734200 |
| H | -0.95918500 | 4.27166900  | -2.26985400 |
| H | 3.13577000  | 5.25200000  | -1.37796000 |
| H | 0.83939100  | 5.97865200  | -2.00805300 |



## Free energy profile

### Int1

|    |             |             |             |
|----|-------------|-------------|-------------|
| N  | 1.28296600  | -0.13965300 | -0.44743700 |
| P  | -1.86120500 | 0.16209400  | -0.03816400 |
| Ir | -0.52013100 | -1.34653100 | -0.93477400 |
| H  | -0.65800100 | -0.43656000 | -2.21327600 |
| C  | 3.42811300  | 0.58047600  | -1.05969000 |
| H  | 3.59142000  | 0.42219700  | -2.12869500 |
| H  | 4.35743000  | 0.88738300  | -0.58455500 |
| C  | 1.29285700  | 1.13103600  | -0.66876700 |
| O  | 2.48075400  | 1.68660500  | -0.92222300 |
| C  | 2.70250500  | -0.59863300 | -0.38104900 |
| C  | 0.08498600  | 2.04469000  | -0.72985600 |
| N  | -0.95697700 | 1.58054000  | 0.19639300  |
| H  | -1.50335700 | 2.35080700  | 0.56436300  |
| C  | -3.28234400 | 0.54545400  | -1.12915400 |
| H  | -3.86260200 | -0.36151800 | -1.30851000 |
| H  | -3.92000500 | 1.31668500  | -0.69098500 |
| H  | -2.88477600 | 0.89952500  | -2.08206900 |
| C  | -2.55556000 | -0.19802800 | 1.66479200  |
| C  | -3.53443200 | -1.38364800 | 1.55499300  |
| H  | -3.05441000 | -2.26981300 | 1.12971400  |
| H  | -3.89007300 | -1.64291100 | 2.55753800  |
| H  | -4.41061100 | -1.14076700 | 0.94669000  |
| C  | -1.40041700 | -0.53986000 | 2.62476400  |
| H  | -1.79156600 | -0.59301000 | 3.64588800  |
| H  | -0.95563000 | -1.50969800 | 2.39584800  |
| H  | -0.61585800 | 0.22097700  | 2.59658800  |
| C  | -3.29783800 | 1.05016000  | 2.19360900  |
| H  | -3.75237000 | 0.79676000  | 3.15689200  |
| H  | -2.61763000 | 1.88836500  | 2.37298600  |
| H  | -4.10353200 | 1.37980700  | 1.53230600  |
| H  | -0.75304000 | -2.73947900 | 0.26317500  |
| H  | -1.79329000 | -2.11092100 | -1.51390500 |
| C  | 0.45515200  | 3.52293300  | -0.43534600 |
| H  | 1.26934200  | 3.67659400  | -1.12692100 |
| C  | 0.96497400  | 3.73156000  | 0.99818500  |
| H  | 1.25291000  | 4.77688400  | 1.14229200  |
| H  | 0.19638200  | 3.49332500  | 1.74012300  |
| H  | 1.83963600  | 3.10963900  | 1.20585900  |
| C  | -0.71945300 | 4.45593500  | -0.76570000 |
| H  | -0.39972400 | 5.49821400  | -0.68083500 |
| H  | -1.08618700 | 4.29411000  | -1.78444400 |
| H  | -1.56413900 | 4.32731000  | -0.07861600 |
| C  | -0.25177100 | 1.99960300  | -1.77819200 |
| C  | 3.17586900  | -0.89744500 | 1.07447400  |
| C  | 3.09755500  | 0.38603000  | 1.95986900  |
| H  | 3.74358900  | 1.16557000  | 1.59811200  |
| H  | 2.07247000  | 0.74006600  | 2.16225800  |
| H  | 3.41756800  | 0.11768000  | 2.97768000  |
| C  | 4.62849200  | -1.41024000 | 1.00687800  |
| C  | 4.98162400  | -1.65762400 | 2.01263000  |
| H  | 4.70001100  | -2.31531600 | 0.39348500  |
| H  | 5.31705700  | -0.66643200 | 0.59407600  |
| H  | 2.80349200  | -1.51097500 | -0.97438800 |
| C  | 2.29605600  | -1.99531000 | 1.69638600  |
| H  | 1.28171400  | -1.62969000 | 1.86817400  |
| H  | 2.24884700  | -2.88337700 | 1.05552000  |
| H  | 2.70439200  | -2.30188100 | 2.66446300  |
| H  | -0.08817300 | -2.40183600 | 0.57353300  |

### Int2<sub>Si</sub>

|    |             |             |             |
|----|-------------|-------------|-------------|
| N  | 0.01994300  | 1.07425400  | -0.29743900 |
| P  | -2.25171300 | -1.06357200 | 0.34366600  |
| Ir | -0.03072500 | -1.19591700 | -0.14435600 |
| H  | -0.63777000 | -1.20781300 | -1.59594000 |
| C  | 2.43406600  | -1.73951200 | -0.65829300 |
| C  | 1.75431600  | -1.55545300 | -1.86266400 |
| C  | 0.88034000  | 3.04146300  | -1.22737200 |
| H  | 1.44743200  | 2.78454700  | -2.12562100 |
| H  | 1.02471200  | 4.09317900  | -0.99019200 |
| C  | -0.87343800 | 1.66492500  | -1.01709700 |
| O  | -0.53798300 | 2.85208500  | -1.53742700 |
| C  | 1.11107200  | 2.06846600  | -0.05877000 |
| C  | -2.26136100 | 1.13733400  | -1.32999100 |
| N  | -2.81085800 | 0.47726600  | -0.13007100 |
| H  | -3.82099600 | 0.55830600  | -0.09881800 |
| C  | -3.18708300 | -2.30370000 | -0.63927600 |
| H  | -2.80324800 | -3.30345700 | -0.42718800 |
| H  | -4.25886500 | -2.26603600 | -0.43219400 |
| H  | -3.01254500 | -2.08491300 | -1.69493300 |
| C  | -2.86346700 | -1.25581800 | 2.10398900  |
| C  | -2.60630900 | -2.71434000 | 2.53410500  |
| H  | -1.55474800 | -2.99384100 | 2.41039500  |
| H  | -2.86031900 | -2.82256400 | 3.59371600  |
| H  | -3.22049600 | -3.42456200 | 1.97325900  |
| C  | -2.09197200 | -0.29444700 | 3.02222300  |
| H  | -2.51365900 | -0.34571100 | 4.03160500  |
| H  | -1.03749600 | -0.56804400 | 3.09257600  |
| H  | -2.16490800 | 0.73973100  | 2.67507500  |
| C  | -4.37094900 | -0.93383200 | 2.18871400  |
| H  | -4.70891300 | -1.11894300 | 3.21381000  |
| H  | -4.57557400 | 0.11797400  | 1.96566800  |
| H  | -4.97770000 | -1.56015200 | 1.52924800  |
| H  | -0.51579200 | -1.69677000 | 1.51735400  |
| H  | -0.18029000 | -2.76516900 | -0.20998700 |
| C  | -3.22335500 | 2.23713000  | -1.84837600 |
| C  | -2.68920000 | 2.72687000  | -2.66912000 |
| C  | -3.55454700 | 3.29955900  | -0.79001800 |
| H  | -4.19064600 | 4.07410300  | -1.22863300 |
| H  | -4.09551100 | 2.87061500  | 0.05959500  |
| C  | -2.65074300 | 3.78016800  | -0.40909600 |
| C  | -4.49714900 | 1.60778400  | -2.43415400 |
| H  | -5.10813400 | 2.37987300  | -2.91015200 |
| H  | -4.26104500 | 0.84828200  | -3.18678700 |
| H  | -5.12150400 | 1.13812600  | -1.66522400 |
| H  | -2.12316200 | 0.42339800  | -2.15757900 |
| C  | 1.01435300  | 2.74922300  | 1.34543600  |
| C  | -0.28301900 | 3.56655500  | 1.49776100  |
| H  | -0.35921100 | 4.38045200  | 0.77044400  |
| H  | -1.16673100 | 2.92871600  | 1.39359900  |
| H  | -0.31812300 | 4.01564700  | 2.49507300  |
| H  | 2.24449300  | 3.66498500  | 1.50682400  |
| H  | 2.23366700  | 4.12963200  | 2.49783800  |
| H  | 3.17354800  | 3.09236500  | 1.41187100  |

|   |            |             |             |
|---|------------|-------------|-------------|
| H | 2.26601200 | 4.47348100  | 0.76890000  |
| H | 2.07519100 | 1.56405200  | -0.13434100 |
| C | 1.04502400 | 1.68658100  | 2.45406800  |
| H | 0.18079700 | 1.02811800  | 2.38139000  |
| H | 1.95337200 | 1.08489800  | 2.40145100  |
| H | 1.01688000 | 2.16903900  | 3.43658700  |
| H | 0.71478000 | -0.30400500 | 1.51092700  |
| C | 1.79565000 | -0.27347600 | -2.67243900 |
| C | 2.08274200 | 0.59569800  | -2.08952200 |
| H | 2.51725200 | -0.38856900 | -3.49096000 |
| H | 0.82108400 | -0.08310800 | -3.12776100 |
| C | 2.65847100 | -3.13241400 | -0.08379300 |
| H | 1.88536400 | -3.84416000 | -0.36522400 |
| H | 3.62573500 | -3.50619900 | -0.44327000 |
| H | 2.71039200 | -3.10882400 | 1.00622800  |
| C | 3.40004500 | -0.73450800 | -0.09092100 |
| C | 3.54429600 | -0.57216300 | 1.29811600  |
| C | 4.30032600 | -0.04479700 | -0.92294000 |
| C | 4.50065000 | 0.28977900  | 1.83230200  |
| H | 2.89887000 | -1.11951000 | 1.97618500  |
| C | 5.25629300 | 0.82338100  | -0.39190300 |
| C | 4.27689300 | -0.20383200 | -1.99388400 |
| C | 5.35333600 | 1.00542800  | 0.98811700  |
| H | 4.57463400 | 0.40543400  | 2.90931500  |
| H | 5.93183000 | 1.34582900  | -1.06116600 |
| H | 6.09516600 | 1.68081800  | 1.40286700  |
| C | 1.30904300 | -2.73366900 | -2.71205700 |
| H | 1.00295300 | -3.60569200 | -2.13848100 |
| H | 0.47976200 | -2.44830700 | -3.36298100 |
| H | 2.15238500 | -3.02405800 | -3.35305500 |

### Int2<sub>Re</sub>

|    |             |             |             |
|----|-------------|-------------|-------------|
| N  | 1.17403800  | 1.19183200  | 0.08486400  |
| P  | 0.90466100  | -1.99125300 | 0.00147100  |
| Ir | -0.58552000 | -0.28098700 | 0.18677200  |
| H  | -0.23322900 | -0.46757700 | 1.70792200  |
| C  | -2.65744600 | 1.21497800  | 0.30225300  |
| C  | -2.03488100 | 1.26224100  | 1.54606400  |
| C  | 2.24763100  | 3.20211300  | 0.63773800  |
| H  | 1.71903200  | 3.65788900  | 1.47944200  |
| H  | 2.99184100  | 3.89347200  | 0.24837900  |
| C  | 2.20322500  | 0.97332500  | 0.83484000  |
| O  | 2.95826400  | 2.03320000  | 1.14789000  |
| C  | 1.29585600  | 2.60041400  | -0.40768300 |
| C  | 2.64078400  | -0.36162100 | 1.40967400  |
| N  | 2.45887600  | -1.41481600 | 0.39609600  |
| C  | 3.14000500  | -2.15723100 | 0.51053400  |
| C  | 0.49987000  | -3.31871900 | 1.20527500  |
| H  | -0.50116900 | -3.70518400 | 1.00388000  |
| H  | 1.22689400  | -4.13318000 | 1.17169500  |
| H  | 0.50127800  | -2.87179900 | 2.20152400  |
| C  | 1.14966900  | -2.85429900 | -1.64533100 |
| C  | -0.15215900 | -3.60412100 | -1.99111700 |
| H  | -1.01911000 | -2.93521300 | -1.98759900 |
| H  | -0.06210300 | -4.03167600 | -2.99514200 |
| H  | -0.35006100 | -4.42631900 | -1.29773400 |
| C  | 1.45991600  | -1.80614900 | -2.72753400 |
| H  | 1.72629700  | -2.31833200 | -3.65804900 |
| H  | 0.59376500  | -1.17681500 | -2.93921400 |
| H  | 2.29768400  | -1.16490000 | -2.44059200 |
| C  | 2.32892700  | -3.84618800 | -1.55615900 |
| H  | 2.41549000  | -4.37206100 | -2.51290300 |
| H  | 3.27943000  | -3.33160100 | -1.38427100 |
| H  | 2.19053300  | -4.60514600 | -0.78151200 |
| H  | -0.81636600 | 0.18489300  | -1.58017300 |
| H  | -1.70756500 | -1.35106200 | 0.45746800  |
| C  | 4.10438700  | -0.34560800 | 1.92240500  |
| H  | 4.17641000  | 0.52833500  | 2.57741700  |
| C  | 5.13283400  | -0.18772200 | 0.79241800  |
| H  | 6.13864100  | -0.10624800 | 1.21466100  |
| H  | 5.12675200  | -1.04997100 | 0.11778000  |
| H  | 4.94033700  | 0.70855900  | 0.19809900  |
| C  | 4.39308300  | -1.58931500 | 2.77757000  |
| H  | 5.38736200  | -1.50860300 | 3.22601700  |
| H  | 3.66354200  | -1.69986900 | 3.58664000  |
| H  | 4.38507800  | -2.51313900 | 2.18735500  |
| H  | 1.99577200  | -0.52457000 | 2.28749000  |
| C  | 1.80386100  | 2.69739100  | -1.87907100 |
| C  | 3.20635100  | 2.08097900  | -2.03437200 |
| H  | 3.95839200  | 2.60760100  | -1.43857300 |
| H  | 3.21136200  | 1.02751200  | -1.73825400 |
| H  | 3.52181500  | 2.13332000  | -3.08080300 |
| C  | 1.83376900  | 4.18793800  | -2.27356600 |
| H  | 2.14605600  | 4.28857200  | -3.31755500 |
| H  | 0.84166200  | 4.64298900  | -2.17528500 |
| H  | 2.53521100  | 4.76899900  | -1.66707100 |
| H  | 0.32138400  | 3.08269100  | -0.36071600 |
| C  | 0.82685400  | 1.96622300  | -2.81398000 |
| H  | 0.82218800  | 0.89742800  | -2.60505700 |
| H  | -0.19370200 | 2.34995900  | -2.71024300 |
| H  | 1.12993300  | 2.10034700  | -3.85712600 |
| C  | -2.51325200 | 0.41597300  | 2.71433500  |
| C  | -3.24229300 | 0.99206600  | 3.29714200  |
| H  | -2.98283800 | -0.51418000 | 2.39786800  |
| H  | -1.67957700 | 0.18017800  | 3.37966300  |
| H  | -1.23212300 | -0.51012300 | -1.49758300 |
| C  | -2.50971100 | 2.29881400  | -0.75303800 |
| H  | -3.30897000 | 3.03710900  | -0.61271600 |
| H  | -1.55694000 | 2.82194100  | -0.71641700 |
| C  | -2.63319400 | 1.88085100  | -1.75481800 |
| C  | -3.91836000 | 0.41172900  | 0.09166900  |
| C  | -4.08442000 | -0.49395300 | -0.96652800 |
| C  | -5.02957000 | 0.69252600  | 0.90338500  |
| C  | -5.30587900 | -1.13336300 | -1.17858900 |
| H  | -3.25392500 | -0.71309100 | -1.62639700 |
| C  | -6.25513600 | 0.05909100  | 0.69033600  |
| H  | -4.93769900 | 1.42079100  | 1.70298400  |
| C  | -6.39584800 | -0.86353300 | -0.34732900 |
| H  | -5.40536400 | -1.84063600 | -1.99674400 |
| H  | -7.09790500 |             |             |

## Int3Si

|    |             |             |             |
|----|-------------|-------------|-------------|
| N  | -0.14495400 | 1.11730500  | 0.08946900  |
| P  | -2.27291500 | -1.01625600 | -0.13176200 |
| Ir | -0.07455100 | -1.07461900 | -0.51781200 |
| H  | -0.07190800 | -1.44492600 | 1.28456700  |
| C  | -2.03799500 | -1.73188700 | 0.32237200  |
| C  | -1.20594900 | -1.69990900 | 1.59042700  |
| C  | -1.15506800 | 3.04503100  | 0.96965900  |
| H  | -1.93493900 | 2.77043900  | 1.68545600  |
| H  | -1.19135400 | 4.11649200  | 0.78385700  |
| C  | 0.56139600  | 1.60396200  | 1.05475900  |
| O  | 0.13349900  | 2.75308200  | 1.59113800  |
| C  | -1.15228700 | 2.15660100  | -0.28629500 |
| C  | 1.80725800  | 1.00291400  | 1.68926200  |
| N  | 2.68495500  | 0.43427700  | 0.65461700  |
| C  | 3.65903600  | 0.48464000  | 0.93205100  |
| C  | 2.79547000  | -2.41481300 | 0.94400800  |
| C  | 2.51519300  | -3.35893600 | 0.47177300  |
| H  | 3.86988600  | -2.40201300 | 1.13938200  |
| H  | 2.26013200  | -2.33351000 | 1.89342200  |
| C  | 3.39575100  | -1.04490400 | -1.63214900 |
| C  | 3.17100500  | -2.37591300 | -2.37559300 |
| H  | 2.12409000  | -2.50442800 | -2.66594300 |
| H  | 3.77819800  | -2.37895800 | -3.28682600 |
| H  | 3.47372700  | -3.23917800 | -1.77539900 |
| C  | 3.03891200  | 0.14309100  | -2.54432700 |
| C  | 3.74790800  | 0.17671700  | -3.37830500 |
| H  | 2.03654000  | 0.04200200  | -2.96723600 |
| H  | 3.09387500  | 1.09419700  | -2.00805900 |
| C  | 4.87150700  | -0.92544500 | -1.19539200 |
| H  | 5.50424000  | -0.97555300 | -2.08761800 |
| H  | 5.08203100  | 0.03174100  | -0.70805800 |
| H  | 5.18243800  | -1.73657200 | -0.53144800 |
| H  | -1.22926400 | -0.97386800 | -1.59940000 |
| H  | 0.06959800  | -2.58036700 | -0.94199200 |
| C  | 2.58596000  | 2.02590100  | 2.55894000  |
| H  | 1.84565200  | 2.45597700  | 3.24029100  |
| C  | 3.20341800  | 3.16608400  | 1.73505600  |
| C  | 3.68082700  | 3.88793600  | 2.40425100  |
| H  | 3.96992300  | 2.79900100  | 1.04505100  |
| C  | 2.44682700  | 3.69521800  | 1.15108700  |
| C  | 3.64424000  | 1.31315500  | 3.41521700  |
| H  | 4.09381900  | 2.02331300  | 4.11474500  |
| H  | 3.20804200  | 0.49379000  | 3.99609800  |
| H  | 4.46236400  | 0.90186800  | 2.81219900  |
| H  | -1.43963400 | 0.22718900  | 2.38105400  |
| C  | -0.78995000 | 2.90668400  | -1.60490400 |
| C  | 0.55729600  | 3.64236700  | -1.48122800 |
| H  | 0.54555800  | 4.40400100  | -0.69514000 |
| H  | 1.37078300  | 2.94176300  | -1.26795400 |
| H  | 0.79334600  | 4.14826000  | -2.42242200 |
| C  | -1.92302500 | 3.91241600  | -1.89703000 |
| H  | -1.72982700 | 4.42457000  | -2.84472100 |
| H  | -2.88940000 | 3.40234200  | -1.98021600 |
| H  | -2.01298700 | 4.68248400  | -1.12447300 |
| C  | -2.11836000 | 1.67252900  | -0.41487700 |
| C  | -0.70891700 | 1.91707700  | -2.77986600 |
| H  | 0.11123100  | 1.21223800  | -2.64737300 |
| H  | -1.63539800 | 1.34527300  | -2.89066400 |
| H  | -0.53982800 | 2.46357100  | -3.71334600 |
| H  | -0.41199300 | -0.76994500 | -1.96924700 |
| C  | -1.48235600 | -0.58354200 | 2.61008400  |
| H  | -1.76483200 | 0.35166400  | -2.13028100 |
| H  | -2.29298900 | -0.88038300 | 3.27869000  |
| H  | -0.59974700 | -0.41299800 | 3.23178500  |
| C  | -2.43645100 | -3.11358900 | -0.20785000 |
| H  | -1.60853600 | -3.82076200 | -0.23943400 |
| H  | -3.22749800 | -3.52781700 | 0.43048800  |
| C  | -2.83988800 | -3.01454400 | -1.21732100 |
| C  | -3.25388800 | -0.82872300 | 0.22482800  |
| C  | -3.58210500 | -0.11157400 | -0.93421600 |
| C  | -4.21017600 | -0.86245600 | 1.25690400  |
| C  | -4.77932900 | 0.59853800  | -1.04050500 |
| H  | -2.88295300 | -0.10161900 | -1.76287100 |
| C  | -5.40676200 | -0.15126200 | 1.15962600  |
| H  | -4.03349400 | -1.46904700 | 2.13839000  |
| C  | -5.69280500 | 0.59412100  | 0.01428300  |
| H  | -4.99058600 | 1.15593300  | -1.94844200 |
| H  | -6.11903000 | -0.18995300 | -1.97847600 |
| H  | -6.62121400 | 1.15191900  | -0.06044800 |
| C  | -0.96527000 | -3.04992700 | 2.28708300  |
| H  | -0.52296000 | -3.78687200 | 1.61719200  |
| H  | -0.29354400 | -2.91428700 | 3.13864500  |
| H  | -1.91614900 | -3.44040300 | 2.66132200  |

## Int3Re

|    |             |             |             |
|----|-------------|-------------|-------------|
| N  | 0.91958400  | 1.29923900  | 0.12865300  |
| P  | 1.10100500  | -1.91438600 | -0.25094400 |
| Ir | -0.62822700 | -0.27189300 | -0.38854700 |
| H  | -0.72787300 | -0.75072400 | 1.40119200  |
| C  | -2.32329100 | 0.61713700  | 0.73395200  |
| C  | -1.75170000 | -0.28479700 | 1.80702600  |
| C  | 1.72743500  | 3.34683100  | 0.93537300  |
| H  | 1.05907300  | 3.73420600  | 1.70957400  |
| H  | 2.47448500  | 4.09672200  | 0.68607200  |
| C  | 1.83197600  | 1.11022400  | 1.02221100  |
| O  | 2.43490600  | 2.20203400  | 1.50428000  |
| C  | 0.97439900  | 2.74268300  | -0.26518400 |
| C  | 2.27073900  | -0.22670700 | 1.60197200  |
| N  | 2.44519500  | -1.20878900 | 0.51762700  |
| H  | 3.19590200  | -1.85897000 | 0.72046600  |
| C  | 0.56710900  | -3.35445500 | 0.76459700  |
| H  | -0.32515900 | -3.80373900 | 0.32326200  |
| H  | 1.35476300  | -4.10353700 | 0.85781000  |
| H  | 0.30992400  | -2.98682800 | 1.76099800  |
| C  | 1.79323400  | -2.61659600 | -1.84326300 |
| C  | 0.65211000  | -3.35127400 | -2.57356900 |
| H  | -0.18948900 | -2.68332100 | -2.77973600 |
| H  | 1.02900500  | -3.72817900 | -3.53005600 |
| O  | 0.28373000  | -4.20900800 | -2.00317200 |
| C  | 2.32486800  | -1.46279700 | -2.71205000 |
| H  | 2.77738300  | -1.87950100 | -3.61801900 |
| H  | 1.52500700  | -0.78677800 | -3.02261400 |
| H  | 3.08661600  | -0.88122800 | -2.18659300 |
| C  | 2.94682500  | -3.59578200 | -1.53982100 |
| H  | 3.32636100  | -3.99023500 | -2.48821600 |
| C  | 3.78707600  | -3.10443700 | -1.03856800 |
| H  | 2.62648300  | -4.45049600 | -0.93876000 |

|   |             |             |             |
|---|-------------|-------------|-------------|
| H | -1.41972100 | 0.79204800  | -1.26816500 |
| H | -1.65733000 | -1.38952800 | -0.79305900 |
| C | 3.56182500  | -0.11818000 | 2.45425400  |
| H | 3.38614400  | 0.70808900  | 3.15028300  |
| C | 4.80741700  | 0.21594700  | 1.61824000  |
| H | 5.66626500  | 0.36118700  | 2.27991400  |
| H | 5.06170100  | -0.59136100 | 0.32395300  |
| H | 4.66767700  | 1.13080100  | 1.03771600  |
| C | 3.76483300  | -1.39211500 | 3.28898200  |
| H | 4.62605600  | -1.26887000 | 3.95148400  |
| H | 2.88829200  | -1.60907400 | 3.90824200  |
| H | 3.96309100  | -2.27261300 | 2.66681400  |
| H | 1.46553200  | -0.52438200 | 2.29323600  |
| C | 1.65910400  | 2.98797800  | -1.64446300 |
| C | 3.10131600  | 2.44932300  | -1.65625800 |
| H | 3.73695700  | 2.95342800  | -0.92094800 |
| H | 3.12212000  | 1.37576700  | -1.44690900 |
| H | 3.55168700  | 2.60587300  | -2.64117900 |
| C | 1.65806900  | 4.50864600  | -1.91004400 |
| H | 2.07965500  | 4.70875000  | -2.89993200 |
| H | 0.63942300  | 4.91220200  | -1.89238100 |
| H | 2.25770700  | 5.06746200  | -1.18517200 |
| H | -0.04318400 | 3.12859100  | -0.32512100 |
| C | 0.84984000  | 2.31066400  | -2.76304000 |
| H | 0.88472800  | 1.22619600  | -2.67517200 |
| H | -0.20158000 | 2.61773700  | -2.73803600 |
| H | 1.26115900  | 2.58507200  | -3.73966800 |
| C | -2.54435700 | -1.56080500 | -2.12598800 |
| H | -3.41392600 | -1.31517900 | 2.74008100  |
| H | -2.89109000 | -2.05044900 | 1.21580700  |
| H | -1.92061400 | -2.26096900 | 2.68796100  |
| H | 0.22858900  | -0.28375400 | -1.89665800 |
| C | -2.18832100 | 2.12005500  | 0.96292500  |
| H | -2.87444200 | 2.43314600  | 1.75866200  |
| H | -1.18430100 | 2.40857900  | 1.26475300  |
| H | -2.45626300 | 2.66871500  | 0.05820100  |
| C | -3.73350800 | 0.30399900  | 0.24992900  |
| C | -4.07897400 | -0.06472900 | -1.05533300 |
| C | -4.77379900 | 0.48211800  | 1.18175700  |
| C | -5.41430800 | -0.26955300 | -1.41497100 |
| H | -3.29952800 | -0.20179400 | -1.79402700 |
| C | -6.10548700 | 0.27074500  | 0.82814800  |
| H | -4.54234800 | 0.78979600  | 2.19778300  |
| C | -6.43262700 | -0.10993500 | -0.47565000 |
| H | -5.65259800 | -0.55673200 | -2.43504100 |
| H | -6.88600300 | 0.40786100  | 1.57079400  |
| H | -7.46890500 | -0.27464400 | -0.75514800 |
| H | -1.23477700 | 0.40633000  | 3.07966200  |
| H | -0.78005000 | -0.33159600 | 3.74575000  |
| H | -0.49373500 | 1.17802800  | 2.86855100  |
| H | -2.07141800 | 0.87190800  | 3.60883400  |

## TS1Si

|    |             |             |             |
|----|-------------|-------------|-------------|
| N  | -0.06569000 | 1.12509300  | 0.11668700  |
| P  | 2.26170500  | -1.07978900 | -0.15696100 |
| Ir | -0.06745800 | -1.07735900 | -0.45956000 |
| H  | -0.20390400 | -1.48740300 | 1.37616400  |
| C  | -2.13879900 | -1.65876100 | 0.28375100  |
| C  | -1.35388300 | -1.60067100 | 1.60446400  |
| C  | -0.98647700 | 3.10369000  | 0.99146000  |
| H  | -1.76778800 | 2.88516200  | 1.72400600  |
| H  | -0.97200600 | 4.17138900  | 0.78282100  |
| C  | 0.67060500  | 1.59311500  | 1.06795100  |
| O  | 0.29496500  | 2.76152200  | 1.60111800  |
| C  | -1.04603000 | 2.19309100  | -0.24950800 |
| C  | 1.89975300  | 0.94358200  | 1.68478000  |
| N  | 2.73844100  | 0.34957300  | 0.63339500  |
| H  | 3.71849300  | 0.36414900  | 0.89192100  |
| C  | 2.77679400  | -2.49593500 | 0.89892500  |
| H  | 2.50376100  | -3.43408200 | 0.41101800  |
| H  | 3.84963300  | -2.48206200 | 1.110356700 |
| H  | 2.23179600  | -2.42905000 | 1.84388200  |
| C  | 3.34956600  | -1.12257600 | -1.68093900 |
| C  | 3.06179300  | -2.43008900 | -2.44444400 |
| H  | 2.00611100  | -2.51205900 | -2.71926800 |
| H  | 3.65399400  | -2.43962900 | -3.36553800 |
| H  | 3.34036900  | -3.31555200 | -1.86510500 |
| C  | 3.01289900  | 0.09332300  | -2.56366600 |
| H  | 3.69269200  | 0.10951900  | -3.42227700 |
| H  | 1.99204800  | 0.04201700  | -2.94897900 |
| C  | 3.12899800  | 1.03244500  | -2.01639600 |
| H  | 4.83783100  | -1.06336700 | -1.27634300 |
| H  | 5.44893200  | -1.11415800 | -2.18357600 |
| H  | 5.09260100  | -0.12590500 | -0.77165800 |
| H  | 5.13379500  | -1.89992500 | -0.63773100 |
| H  | -1.46298400 | -1.02821000 | -1.25435800 |
| H  | 0.03944000  | -2.59304800 | -0.86531600 |
| C  | 2.72930500  | 1.93067600  | 2.54852700  |
| H  | 2.01504100  | 2.38844400  | 3.23977600  |
| C  | 3.38366300  | 3.04775000  | 1.72108800  |
| H  | 3.89452500  | 3.74921000  | 2.38728300  |
| H  | 4.12955200  | 2.65241800  | 1.02429100  |
| H  | 2.64309100  | 3.60670700  | 1.14426600  |
| C  | 3.76751300  | 1.17204300  | 3.38980900  |
| H  | 4.25542100  | 1.86076500  | 4.08511000  |
| H  | 3.30443400  | 0.37046200  | 3.97458000  |
| H  | 4.55975800  | 0.72796900  | 2.77545200  |
| H  | 1.51035300  | 0.17827200  | 2.37712000  |
| C  | -0.69053300 | 2.91486700  | -1.58666700 |
| C  | 0.69045500  | 3.59210800  | -1.50369900 |
| H  | 0.73335700  | 4.35659100  | -0.72136900 |
| H  | 1.47832000  | 2.85783100  | -1.30906100 |
| H  | 0.92152800  | 4.08371900  | -2.45356400 |
| C  | -1.78604100 | 3.96674800  | -1.85911600 |
| H  | -1.60074400 | 4.45496600  | -2.82087400 |
| H  | -2.77641400 | 3.49956500  | -1.90336600 |
| H  | -1.81559500 |             |             |

|   |             |             |             |
|---|-------------|-------------|-------------|
| H | -2.92350500 | -2.99138400 | -1.22664000 |
| C | -3.35715000 | -0.75623100 | 0.16325100  |
| C | -3.62542900 | 0.02175900  | -0.96869600 |
| C | -4.35039900 | -0.83861000 | 1.15488500  |
| C | -4.81507600 | 0.74334500  | -1.08930300 |
| H | -2.89012800 | 0.06907600  | -1.76541300 |
| C | -5.53957600 | -0.11906200 | 1.04114000  |
| H | -4.20477200 | -1.48271900 | 2.01607500  |
| C | -5.77320600 | 0.68497600  | -0.07712600 |
| H | -4.98583400 | 1.34854100  | -1.97452000 |
| H | -6.28658700 | -0.19381700 | 1.82562500  |
| H | -6.69667600 | 1.24924500  | -0.16279200 |
| C | -1.31071300 | -2.91551500 | 2.40591500  |
| H | -0.90342800 | -3.74230100 | 1.82404500  |
| H | -0.68530600 | -2.78117500 | 3.29271000  |
| H | -2.31916100 | -3.18176000 | 2.73609600  |

|   |             |             |             |
|---|-------------|-------------|-------------|
| H | 3.64082600  | -0.00802000 | 1.50803500  |
| C | 1.56424100  | -2.50176900 | 1.45728700  |
| H | 1.27493200  | -3.42055300 | 0.94335000  |
| H | 2.31699400  | -2.71980200 | 2.21857000  |
| H | 0.67989600  | -2.08152900 | 1.94110700  |
| C | 3.78894400  | -1.97184600 | -0.47631000 |
| C | 3.45322200  | -3.23649100 | -1.29079200 |
| H | 2.77766800  | -3.01204000 | -2.11801100 |
| H | 4.38217600  | -3.64142000 | -1.70551000 |
| H | 3.00002500  | -4.01770500 | -0.67296300 |
| C | 4.43462700  | -0.91316100 | -1.39162300 |
| H | 5.37476900  | -1.31372000 | -1.78498800 |
| H | 3.79052200  | -0.67278300 | -2.24151700 |
| H | 4.65665900  | 0.01317000  | -0.85547800 |
| C | 4.76558000  | -2.34294800 | 0.66298700  |
| H | 5.67996100  | -2.74392500 | 0.21414800  |
| H | 5.06423700  | -1.48352600 | 1.27195000  |
| H | 4.36143800  | -3.11247000 | 1.32549000  |
| H | -2.38612300 | -0.44865600 | -0.50388600 |
| H | 0.67977300  | -2.07556800 | -1.87484800 |
| C | 2.66036800  | 1.97548800  | 2.69821500  |
| H | 1.92067600  | 2.54718800  | 3.26645800  |
| C | 3.42094800  | 2.94295500  | 1.78152400  |
| H | 3.97457300  | 3.67002200  | 2.38259900  |
| H | 4.13896900  | 2.41466300  | 1.144667700 |
| H | 2.73760900  | 3.49784800  | 1.13249600  |
| C | 3.59224000  | 1.29331600  | 3.71067900  |
| H | 4.03248600  | 2.04677600  | 4.36971300  |
| H | 3.05351200  | 0.57073800  | 4.33225400  |
| H | 4.42876500  | 0.77216900  | 3.23018700  |
| H | 1.28485800  | 0.32377200  | 2.63981200  |
| C | -0.23557900 | 3.14919900  | -1.69723400 |
| C | 1.01518000  | 3.96361400  | -1.32329400 |
| H | 0.83595100  | 4.64084700  | -0.48205700 |
| H | 1.84829700  | 3.30273900  | -1.06551900 |
| H | 1.32792600  | 4.57634000  | -2.17417700 |
| C | -1.40199400 | 4.09029400  | -2.06049300 |
| H | -1.12382100 | 4.71536200  | -2.91434900 |
| H | -2.29631300 | 3.52094500  | -2.33787300 |
| H | -1.66868200 | 4.76204800  | -1.23848700 |
| H | -1.59247300 | 1.70637700  | -0.84081800 |
| C | 0.08823100  | 2.27152000  | -2.91944600 |
| H | 0.99394100  | 1.68280100  | -2.76155200 |
| H | -0.73669100 | 1.58605500  | -3.15362200 |
| H | 0.25146300  | 2.90063800  | -3.80043400 |
| H | 1.72007700  | -0.23057000 | -2.09365900 |
| C | -1.94087200 | -0.80793300 | 2.10295700  |
| H | -1.36273900 | 0.00894900  | 1.66253700  |
| H | -2.85959700 | -0.37893900 | 2.51594300  |
| H | -1.36296300 | -1.21899400 | 2.93805300  |
| C | -3.03774800 | -2.29428000 | -1.34671400 |
| H | -2.02159000 | -2.61508900 | -1.60296200 |
| H | -3.61783500 | -3.19128100 | -1.11269900 |
| H | -3.48672700 | -1.83370900 | -2.23213300 |
| C | -4.37059600 | -0.72690900 | 0.16187800  |
| C | -4.52989700 | 0.65360500  | 0.35395600  |
| C | -5.50383500 | -1.54338600 | 0.30600000  |
| C | -5.76894100 | 1.20451800  | 0.68771300  |
| H | -3.67229500 | 1.31049700  | 0.23366500  |
| C | -6.74519500 | -0.99965500 | 0.64189300  |
| H | -5.41997900 | -2.61477000 | 0.15585400  |
| C | -6.88356300 | 0.37692700  | 0.83625100  |
| H | -5.86243200 | 2.27780300  | 0.82763900  |
| H | -7.60615500 | -1.65345500 | 0.74966000  |
| H | -7.84993400 | 0.79941800  | 1.09532900  |
| C | -2.97840900 | -3.07155500 | 1.73388200  |
| H | -3.20526300 | -3.87345000 | 1.02529300  |
| H | -2.34757700 | -3.49495400 | 2.52254000  |
| H | -3.91732000 | -2.75038100 | 2.19552800  |

### TS1<sub>Re</sub>

|    |             |             |             |
|----|-------------|-------------|-------------|
| N  | 0.91225900  | 1.30492600  | 0.10568600  |
| F  | -1.14702300 | -1.90094900 | -0.18783400 |
| Ir | -0.59435300 | -0.32934200 | -0.30477600 |
| H  | -0.77682200 | -0.63395300 | 1.54821000  |
| C  | -2.36678900 | 0.67647000  | 0.67269400  |
| C  | -1.81125400 | -0.16427600 | 1.84437700  |
| C  | 1.71063700  | 3.39255100  | 0.80523500  |
| H  | 1.05405900  | 3.78885700  | 1.58527300  |
| H  | 2.43189100  | 4.15130100  | 0.51025300  |
| C  | 1.86031200  | 1.16510900  | 0.97073600  |
| O  | 2.46145900  | 2.28362500  | 1.38918400  |
| C  | 0.93739600  | 2.73127100  | -0.35022500 |
| C  | 2.34708800  | -0.14633200 | 1.56707900  |
| N  | 2.51343900  | -1.14163000 | 0.49214200  |
| H  | 3.28205800  | -1.77377000 | 0.68569400  |
| C  | 0.68398400  | -3.29116800 | 0.92789700  |
| H  | -0.22158000 | -3.77549700 | 0.55685800  |
| H  | 1.48637900  | -4.02600900 | 1.02493000  |
| H  | 0.46894300  | -2.86933900 | 1.91327700  |
| C  | 1.78474400  | -2.67173100 | -1.76887100 |
| C  | 0.63243600  | -3.48100600 | -2.39717400 |
| H  | -0.24111700 | -2.85098200 | -2.58966200 |
| H  | 0.97079300  | -3.89479200 | -3.35292400 |
| H  | 0.32346800  | -4.32006300 | -1.76654300 |
| C  | 2.23252600  | -1.55783200 | -2.73228800 |
| C  | 2.64705600  | -2.01700900 | -3.63613100 |
| H  | 1.39630400  | -0.92411200 | -3.03564100 |
| H  | 3.00531900  | -0.92656300 | -2.28648000 |
| C  | 2.98415400  | -3.59485300 | -1.47092600 |
| C  | 3.31666800  | -4.04844500 | -2.41049200 |
| H  | 3.83723300  | -3.04349800 | -1.06226500 |
| H  | 2.73030500  | -4.41027600 | -0.78876000 |
| H  | -1.63892700 | 0.74738000  | -0.90779300 |
| H  | -1.59352500 | -1.50193100 | -0.63331400 |
| C  | 3.65711800  | 0.00798400  | 2.38166700  |
| H  | 3.48101600  | 0.84353400  | 3.06674600  |
| C  | 4.87280700  | 0.35285700  | 1.50673600  |
| H  | 5.74567800  | 0.52820600  | 2.14234700  |
| H  | 5.12573800  | -0.46219100 | 0.82098700  |
| H  | 4.69822400  | 1.25301200  | 0.91322000  |
| C  | 3.91346200  | -1.24552600 | 3.23257400  |
| H  | 4.78164300  | -1.08539500 | 3.87792900  |
| H  | 3.05504200  | -1.48136400 | 3.87005700  |
| H  | 4.12997100  | -2.12750500 | 2.61881000  |
| H  | 1.56571000  | -0.45052800 | 2.28351600  |
| C  | 1.58530700  | 2.92546800  | -1.75524900 |
| C  | 3.02862600  | 2.39044600  | -1.78423300 |
| H  | 3.67945800  | 2.92192800  | -1.08210700 |
| H  | 3.05836900  | 1.32477100  | -1.53818500 |
| C  | 3.45392600  | 2.51444500  | -2.78481900 |
| C  | 1.57232100  | 4.43459400  | -2.07986700 |
| H  | 1.96142400  | 4.59556900  | -3.08998600 |
| H  | 0.55397600  | 4.83798000  | -2.04563300 |
| H  | 2.19382500  | 5.02207500  | -1.39736000 |
| H  | -0.08487300 | 3.10453500  | -0.40311600 |
| C  | 0.74777500  | 2.20340900  | -2.82366100 |
| H  | 0.77734100  | 1.12427100  | -2.68491900 |
| H  | -0.30096900 | 2.51890200  | -2.78914800 |
| H  | 1.13815800  | 2.43053400  | -3.82090100 |
| C  | -2.62586900 | -1.41471100 | 2.21174600  |
| H  | -3.52327600 | -1.13355600 | 2.76755300  |
| H  | -2.92920300 | -1.96758700 | 1.32246000  |
| H  | -2.02513200 | -2.07259900 | 2.84579600  |
| H  | -0.29252500 | -0.32854400 | -1.83172700 |
| C  | -2.26458100 | 2.19257100  | 0.86160400  |
| H  | -2.95601200 | 2.51399500  | 1.64696600  |
| H  | -1.26588800 | 2.50651400  | 1.15584400  |
| H  | -2.54225000 | 2.71071600  | -0.05856200 |
| C  | -3.76596000 | 0.30971900  | 0.19933100  |
| C  | -4.06609300 | -0.19355500 | -1.07110100 |
| C  | -4.83052900 | 0.55676300  | 1.08507200  |
| C  | -5.38761800 | -0.45488800 | -1.44429400 |
| H  | -3.26227600 | -0.39064900 | -1.77045000 |
| C  | -6.14807100 | 0.28872300  | 0.71793700  |
| H  | -4.63069600 | 0.95788100  | 2.07439500  |
| C  | -6.43307100 | -0.22030300 | -0.55171100 |
| H  | -5.59378200 | -0.84456600 | -2.43682800 |
| H  | -6.95088900 | 0.48148100  | 1.42333100  |
| H  | -7.45888200 | -0.42773900 | -0.84093200 |
| C  | -1.39696500 | 0.62842600  | 3.09728300  |
| H  | -0.98227100 | -0.05663100 | 3.84158000  |
| H  | -0.64468700 | 1.38891600  | 2.88262500  |
| H  | -2.26950200 | 1.11872800  | 3.53881300  |

### Int4<sub>Re</sub>

|    |             |             |             |
|----|-------------|-------------|-------------|
| N  | 0.63621600  | 1.35447800  | 0.02214100  |
| P  | 1.88009700  | -1.60031400 | -0.06919600 |
| Ir | 0.36303700  | -0.47471100 | -1.18900100 |
| H  | -1.30111400 | -1.13445600 | 1.34425900  |
| H  | -2.99457100 | -0.01379300 | 0.67239400  |
| C  | -2.37473200 | -1.34503800 | 1.20512800  |
| C  | -0.00098000 | 3.36465700  | 1.10212900  |
| H  | -1.00857700 | 3.48386700  | 1.50053300  |
| H  | 0.52451000  | 4.31712200  | 1.14964300  |
| C  | 1.00331100  | 1.35306300  | 1.25776700  |
| O  | 0.71428800  | 2.44165400  | 1.97631000  |
| C  | 0.03626800  | 2.68370400  | -0.28983600 |
| C  | 1.66481400  | 0.21523400  | 2.01890600  |
| N  | 2.51516100  | -0.58127200 | 1.13076500  |
| H  | 3.33235000  | -0.94611400 | 1.60487500  |
| C  | 1.15262400  | -3.07282000 | 0.75177700  |
| H  | 0.79925000  | -3.77946900 | -0.00129400 |
| H  | 1.88127000  | -3.55450100 | 1.40825100  |
| H  | 0.29691700  | -2.74407300 | 1.34522800  |
| C  | 3.40587500  | -2.16040700 | -1.00300000 |
| C  | 2.96187100  | -3.03282500 | -2.19386300 |
| H  | 2.33283300  | -2.47231700 | -2.88864900 |
| H  | 3.85358200  | -3.37158600 | -2.73163000 |
| H  | 2.41242400  | -3.92270400 | -1.87171100 |
| C  | 4.16913000  | -0.92091500 | -1.51093000 |
| H  | 5.05329200  | -1.25505500 | -2.06388700 |
| H  | 3.55804000  | -0.31758500 | -2.18774500 |
| H  | 4.50128600  | -0.28093600 | -0.68976100 |
| C  | 4.32125300  | -2.98766600 | -0.07326100 |
| H  | 5.21331500  | -3.27918600 | -0.63724500 |
| H  | 4.66785800  | -2.42289900 | 0.79831000  |
| H  | 3.83884700  | -3.90440600 | 0.27441900  |
| H  | -2.44438800 | 0.22496800  | -0.25172900 |
| H  | 0.04305400  | -1.78575500 | -2.03552300 |
| C  | 2.48199900  | 0.73047300  | 3.23457300  |
| H  | 1.78760600  | 1.34558200  | 3.81456600  |
| C  | 3.66962600  | 1.60889100  | 2.81391100  |
| H  | 4.17866400  | 1.99446500  | 3.70198000  |
| H  | 4.40363800  | 1.04431900  | 2.23022800  |
| H  | 3.34410900  | 2.46318500  | 2.21415900  |
| C  | 2.92763900  | -0.43556600 | 4.12963100  |
| H  | 3.37468000  | -0.04571400 | 5.04828800  |
| H  | 2.08427900  | -1.07625900 | 4.40690900  |
| H  | 3.68743700  | -1.06428600 | 3.65070100  |
| H  | 0.82844200  | -0.37923300 | 2.42526400  |
| C  | 0.82004600  | 3.47433600  | -1.37796300 |
| C  | 2.29807000  | 3.63264000  | -0.97997700 |
| H  | 2.41828700  | 4.19099600  | -0.04525100 |
| H  | 2.77606600  | 2.65583000  | -0.85818300 |

### Int4<sub>Si</sub>

|    |             |             |             |
|----|-------------|-------------|-------------|
| N  | 0.32722600  | 1.25401000  | -0.10096700 |
| P  | 2.19762100  | -1.28070300 | 0.23822700  |
| Ir | 0.60288700  | -0.66471400 | -1.13472800 |
| H  | -1.30959000 | -2.27636200 | 0.66998100  |
| C  | -3.00085700 | -1.29918500 | -0.17354100 |
| C  | -2.25954100 | -1.89197600 | 1.06490300  |
| C  | -0.97776600 | 2.98844400  | 0.8140      |

|   |             |             |             |
|---|-------------|-------------|-------------|
| H | 2.83861100  | 4.18095700  | -1.75747900 |
| C | 0.15173300  | 4.85633000  | -1.53815900 |
| H | 0.64476500  | 5.41478400  | -2.33954200 |
| H | -0.90703700 | 4.75486200  | -1.80235300 |
| H | 0.21858400  | 5.46532100  | -0.63151300 |
| H | -0.98010100 | 2.53113500  | -0.65938000 |
| C | 0.72952600  | 2.74083400  | -2.72792300 |
| H | 1.26998700  | 1.79165500  | -2.70742600 |
| H | -0.31342400 | 2.54252600  | -3.00127700 |
| H | 1.16922200  | 3.35574600  | -3.51984300 |
| C | -2.50408300 | -2.48163700 | 0.18202800  |
| H | -3.55255700 | -2.76285400 | 0.04301400  |
| H | -2.10212800 | -2.18830700 | -0.79349400 |
| H | -1.95859500 | -3.37012200 | 0.51535300  |
| H | 1.45710600  | -0.24606100 | -2.23810500 |
| C | -2.76320100 | 1.15524500  | 1.64287300  |
| H | -3.33822400 | 1.04940600  | 2.56587300  |
| H | -1.70891800 | 1.21575900  | 1.92922100  |
| H | -3.05539100 | 2.10414700  | 1.18267200  |
| C | -4.45393400 | -0.15871500 | 0.26275100  |
| C | -4.78029200 | -0.37598700 | -1.08446800 |
| C | -5.50398600 | -0.11133100 | 1.19324100  |
| C | -6.10398300 | -0.54833500 | -1.49318700 |
| H | -3.98314100 | -0.41539200 | -1.82316400 |
| C | -6.83029100 | -0.28445600 | 0.79078400  |
| H | -5.29150800 | 0.06271500  | 2.24305400  |
| C | -7.13664400 | -0.50477000 | -0.55390600 |
| H | -6.32733300 | -0.71437200 | -2.54333100 |
| H | -7.62500600 | -0.24519300 | 1.53052500  |
| H | -8.16831600 | -0.63746200 | -0.86636200 |
| C | -2.92451100 | -1.79424300 | 2.56644000  |
| H | -2.40572300 | -2.69923300 | 2.89980900  |
| H | -2.79226100 | -1.03266500 | 3.34043400  |
| H | -3.99127100 | -2.03082800 | 2.49930400  |

## Int5

|    |             |             |             |
|----|-------------|-------------|-------------|
| N  | 1.32210100  | -0.02000400 | -0.47223300 |
| P  | -1.85012000 | 0.03260300  | -0.21143900 |
| Ir | -0.31957200 | -1.46415600 | -0.68687900 |
| C  | 3.40942700  | 0.89373800  | -1.05981400 |
| H  | 3.64112300  | 0.78545600  | -2.12209600 |
| H  | 4.28211400  | 1.27006600  | -0.53000300 |
| C  | 1.22509300  | 1.25004200  | -0.68057300 |
| O  | 2.36116100  | 1.90300300  | -0.94170800 |
| C  | 2.77254900  | -0.37420300 | -0.44881400 |
| C  | -0.04116700 | 2.08738600  | -0.71770100 |
| N  | -1.08105900 | 1.50709600  | 0.13455700  |
| H  | -1.69493100 | 2.21456400  | 0.51993500  |
| C  | -2.97242900 | 0.28373400  | -1.64428800 |
| H  | -3.56934700 | -0.61613500 | -1.80538400 |
| H  | -3.62646600 | 1.14413000  | -1.48597200 |
| H  | -2.36043800 | 0.45774600  | -2.53309100 |
| C  | -2.91345000 | -0.24201400 | 1.30571900  |
| C  | -3.62903900 | -1.60009200 | 1.16578100  |
| H  | -2.91630600 | -2.42360200 | 1.08565800  |
| H  | -4.24769800 | -1.76414400 | 2.05435300  |
| H  | -4.29005700 | -1.62968800 | 0.29402000  |
| C  | -2.00987500 | -0.24294700 | 2.55483400  |
| H  | -2.63282100 | -0.40590400 | 3.44059400  |
| H  | -1.26549300 | -1.04287400 | 2.51566700  |
| H  | -1.48230700 | 0.70661100  | 2.67545500  |
| C  | -3.96799100 | 0.88182200  | 1.42876000  |
| H  | -4.56269800 | 0.69731200  | 2.32937500  |
| H  | -3.52402300 | 1.87632300  | 1.54177600  |
| H  | -4.65750200 | 0.90178600  | 0.58075200  |
| H  | -1.46398200 | -2.52523500 | -1.00954800 |
| C  | 0.23541200  | 3.56041700  | -0.30482000 |
| H  | 1.04682000  | 3.89864900  | -0.95629700 |
| C  | 0.70277400  | 3.68507600  | 1.15270000  |
| H  | 0.93647700  | 4.72923900  | 1.37986700  |
| H  | -0.06962300 | 3.35644700  | 1.85528100  |
| H  | 1.60228800  | 3.09142300  | 1.33683300  |
| C  | -0.98544200 | 4.44805700  | -0.58926600 |
| H  | -0.72425500 | 5.49770200  | -0.42833300 |
| H  | -1.33105000 | 4.33862400  | -1.62237100 |
| H  | -1.82924100 | 4.22811200  | 0.07556400  |
| H  | -0.34254700 | 2.10789300  | -1.77865900 |
| C  | 3.27915800  | -0.74771800 | 0.97653500  |
| C  | 3.03996300  | 0.40558800  | 1.96788800  |
| C  | 3.56597200  | 1.31999800  | 1.67385300  |
| H  | 1.97326500  | 0.63432300  | 2.05454000  |
| H  | 3.40323900  | 0.12525000  | 2.96129700  |
| C  | 4.78563900  | -1.06591600 | 0.88051600  |
| H  | 5.15997700  | -1.37976100 | 1.85966400  |
| H  | 4.97322700  | -1.88096000 | 0.17252800  |
| H  | 5.37992300  | -0.20152000 | 0.56851500  |
| H  | 2.93068600  | -1.23594400 | -1.10390000 |
| C  | 2.54882200  | -2.00683800 | 1.47642700  |
| H  | 1.48990100  | -1.80924600 | 1.65588100  |
| H  | 2.62708400  | -2.82688800 | 0.75274500  |
| H  | 2.99079800  | -2.34849200 | 2.41796200  |
| H  | -0.50655900 | -1.97072200 | 0.74886300  |

## S3

|   |             |             |             |
|---|-------------|-------------|-------------|
| C | -1.03245100 | 0.54036300  | 0.16506400  |
| H | -1.97676300 | -0.36946700 | -0.15787000 |
| C | -1.65339200 | -1.74066500 | -0.71009300 |
| H | -0.59412900 | -1.87899500 | -0.92829700 |
| H | -1.96125900 | -2.52652700 | -0.00742300 |
| H | -2.22022900 | -1.91563400 | -1.63406100 |
| C | -1.31316000 | 1.94323400  | 0.66397100  |
| H | -2.37349000 | 2.19687600  | 0.68383700  |
| H | -0.91128600 | 2.07777600  | 1.67637900  |
| H | -0.80750900 | 2.68374200  | 0.03261200  |
| C | 0.43015300  | 0.23159700  | 0.07652500  |
| C | 1.26578100  | 0.95289700  | -0.79264100 |
| C | 1.01316700  | -0.75127600 | 0.89303400  |
| C | 2.63494000  | 0.68909600  | -0.85615500 |
| H | 0.83560700  | 1.71753500  | -1.43402800 |
| C | 2.38295700  | -1.01617400 | 0.83404300  |
| H | 0.37996200  | -1.30895600 | 1.57724700  |
| C | 3.19929600  | -0.29672000 | -0.04189300 |
| H | 3.26118900  | 1.25163300  | -1.54318000 |
| H | 2.81221200  | -1.78186200 | 1.47443600  |
| H | 4.26517400  | -0.50080400 | -0.08894800 |
| C | -3.46509300 | -0.13557000 | -0.03572100 |
| H | -3.73327700 | 0.80866800  | 0.43872400  |
| H | -3.94090100 | -0.16355600 | -1.02512700 |
| H | -3.92466600 | -0.94378700 | 0.54825300  |

## S3-H<sub>2</sub>(R)

|   |             |             |             |
|---|-------------|-------------|-------------|
| H | 3.08647300  | 0.26607000  | -0.29555400 |
| C | 1.09125100  | -0.22582600 | -0.87769100 |
| C | 2.08995300  | 0.39229500  | 0.15255400  |
| H | 1.17730900  | 0.39844500  | -1.77761700 |
| C | 1.85158800  | 1.89786800  | 0.33632600  |
| H | 1.88544600  | 2.42804200  | -0.62213900 |
| H | 0.87200100  | 2.08872200  | 0.78777800  |
| H | 2.61357000  | 2.33480700  | 0.99075000  |
| C | 1.50066200  | -1.65039700 | -1.29044800 |
| H | 2.52232800  | -1.65250300 | -1.68512900 |
| H | 1.47149100  | -2.35402100 | -0.45355900 |
| H | 0.83362000  | -2.03553900 | -2.06805700 |
| C | -0.36106200 | -0.13809000 | -0.42757300 |
| C | -1.16743300 | 0.92448600  | -0.86376500 |
| C | -0.93537500 | -1.08320300 | 0.43750600  |
| C | -2.49558900 | 1.04713000  | -0.45011200 |
| H | -0.74579300 | 1.66579000  | -1.53806600 |
| C | -2.26307100 | -0.96651500 | 0.85493100  |
| H | -0.34328800 | -1.92135800 | 0.79078300  |
| C | -3.04994500 | 0.09996900  | 0.41369700  |
| H | -3.09674800 | 1.87947000  | -0.80584300 |
| H | -2.68325500 | -1.71226700 | 1.52435800  |
| H | -4.08340400 | 0.18918900  | 0.73612300  |
| C | 2.10069900  | -0.31537000 | 1.51539600  |
| H | 2.29980800  | -1.38761200 | 1.42445400  |
| H | 2.87869000  | 0.11196900  | 2.15706200  |
| H | 1.14169900  | -0.19328500 | 2.02971900  |

## S3-H<sub>2</sub>(S)

|   |             |             |             |
|---|-------------|-------------|-------------|
| H | 3.08649500  | 0.26625900  | 0.29590900  |
| C | 1.09114200  | -0.22561300 | 0.87774600  |
| C | 2.09005100  | 0.39227400  | -0.15244400 |
| C | 2.10112000  | -0.31566900 | -1.51511300 |
| H | 2.30037800  | -1.38786400 | -1.42397600 |
| H | 1.14213100  | -0.19381000 | -2.02950600 |
| H | 2.87910600  | 0.11169000  | -2.15679000 |
| C | 1.50038700  | -1.65014600 | 1.29078300  |
| H | 1.47141800  | -2.35382300 | 0.45392300  |
| H | 2.52191700  | -1.65227900 | 1.68579300  |
| H | 0.83307700  | -2.03520600 | 2.06821000  |
| C | -0.36104800 | -0.13796400 | 0.42745300  |
| C | -0.93524100 | -1.08308400 | -0.43767900 |
| C | -1.16755600 | 0.92450100  | 0.86372400  |
| C | -2.26295500 | -0.96650800 | -0.85509900 |
| H | -0.34309300 | -1.92118200 | -0.79099300 |
| C | -2.49572100 | 1.04700600  | 0.45010700  |
| H | -0.74597300 | 1.66580500  | 1.53806500  |
| C | -3.04996500 | 0.09983000  | -0.41377400 |
| H | -2.68302400 | -1.71228600 | -1.52457100 |
| H | -3.09699900 | 1.87923300  | 0.80591000  |
| H | -4.08343900 | 0.18896600  | -0.73617800 |
| C | 1.85149800  | 1.89776300  | -0.33664600 |
| H | 1.88489900  | 2.42819400  | 0.62172100  |
| H | 2.61363300  | 2.33475500  | -0.99086700 |
| H | 0.87204400  | 2.08838700  | -0.78853600 |
| H | 1.17715100  | 0.39882600  | 1.77753300  |

## H<sub>2</sub>

|   |            |            |             |
|---|------------|------------|-------------|
| H | 0.00000000 | 0.00000000 | 0.37155000  |
| H | 0.00000000 | 0.00000000 | -0.37155000 |

## 11. References

- (1) (a) Becke, A. D. Density-functional thermochemistry. III. The role of exact Exchange. *J. Chem. Phys.* **1993**, *98*, 5648–5652. (b) Stephens, P. J.; Devlin, F. J.; Chabalowski, C. F.; Frisch, M. J. Ab Initio Calculation of Vibrational Absorption and Circular Dichroism Spectra Using Density Functional Force Fields. *J. Phys. Chem.* **1994**, *98*, 11623–11627.
- (2) Grimme, S.; Antony, J.; Ehrlich, S.; Krieg, H. A consistent and accurate ab initio parametrization of density functional dispersion correction (DFT-D) for the 94 elements H-Pu. *J. Chem. Phys.* **2010**, *132*, 154104.
- (3) Petersson, G. A.; Bennett, A.; Tensfeldt, T. G.; Al-Laham, M. A.; Shirley, W. A.; Mantzaris, J. “A complete basis set model chemistry. I. The total energies of closed-shell atoms and hydrides of the first-row atoms,” *J. Chem. Phys.* **1988**, *89*, 2193–2218.
- (4) (a) Hay, P. J.; Wadt, W. R. Ab initio effective core potentials for molecular calculations. Potentials for the transition metal atoms Sc to Hg. *J. Chem. Phys.* **1985**, *82*, 270–283. (b) Hay, P. J.; Wadt, W. R. Ab initio effective core potentials for molecular calculations. Potentials for K to Au including the outermost core orbitals. *J. Chem. Phys.* **1985**, *82*, 299–310.
- (5) (a) Brandt, P.; Hedberg, C.; Andersson, P. G. New Mechanistic Insights into the Iridium–Phosphanooxazoline-Catalyzed Hydrogenation of Unfunctionalized Olefins: A DFT and Kinetic Study. *Chem. – Eur. J.* **2003**, *9*, 339–347. (b) Fan, Y.; Cui, X.; Burgess, K.; Hall, M. B. Electronic effects steer the mechanism of asymmetric hydrogenations of unfunctionalized aryl-substituted alkenes. *J. Am. Chem. Soc.* **2004**, *126*, 16688–16689. (c) Cui, X.; Fan, Y.; Hall, M. B.; Burgess, K. Mechanistic Insights into Iridium-Catalyzed Asymmetric Hydrogenation of Dienes. *Chem. – Eur. J.* **2005**, *11*, 6859–6868. (d) Church, T. L.; Rasmussen, T.; Andersson, P. G. Enantioselectivity in the Iridium-Catalyzed Hydrogenation of Unfunctionalized Olefins. *Organometallics* **2010**, *29*, 6769–6781. (e) Hopmann, K. H.; Bayer, A. On the mechanism of iridium-catalyzed asymmetric hydrogenation of imines and alkenes: A theoretical study. *Organometallics* **2011**, *30*, 2483–2497. (f) Mazuela, J.; Norrby, P.-O.; Andersson, P. G.; Pamies, O.; Diéguez, M. Pyranoside Phosphite–Oxazoline Ligands for the Highly Versatile and Enantioselective Ir-Catalyzed Hydrogenation of Minimally Functionalized Olefins. A Combined Theoretical and Experimental Study. *J. Am. Chem. Soc.* **2011**, *133*, 13634–13645. (g) Gruber, S.; Pfaltz, A. Asymmetric hydrogenation with iridium C, N and N, P ligand complexes: characterization of dihydride intermediates with a coordinated alkene. *Angew. Chem., Int. Ed.* **2014**, *53*, 1896–1900.
- (6) (a) Aguado-Ullate, S.; Saureu, S.; Guasch, L.; Carbó, J. J. Theoretical Studies of Asymmetric Hydroformylation Using the Rh–(R,S)-BINAPHOS Catalyst – Origin of Coordination Preferences and Stereinduction. *Chem. – Eur. J.* **2012**, *18*, 995–1005. (b) Aguado-Ullate, S.; Urbano-Cuadrado, M.; Villalba, I.; Pires, E.; García, J. I.; Bo, C.; Carbó, J. J. Predicting the Enantioselectivity of the Copper-

Catalysed Cyclopropanation of Alkenes by Using Quantitative Quadrant-Diagram Representations of the Catalysts. *Chem. – Eur. J.* **2012**, *18*, 14026–14036.

(7) Dunning, T. H. Gaussian basis sets for use in correlated molecular calculations. I. The atoms boron through neon and hydrogen. *J. Chem. Phys.* **1989**, *90*, 1007–1023.

(8) Woon, D. E.; Dunning, T. H. Gaussian basis sets for use in correlated molecular calculations. III. The atoms aluminum through argon. *J. Chem. Phys.* **1993**, *98*, 1358–1371.

(9) Figgen, D.; Peterson, K. A.; Dolg, M.; Stoll, H. Energy-consistent pseudopotentials and correlation consistent basis sets for the 5d elements Hf–Pt. *J. Chem. Phys.* **2009**, *130*, 164108.

(10) Pritchard, B.P.; Altarawy, D.; Didier, B.; Gibson, T.D.; Windus, T.L.. *A New Basis Set Exchange: An Open, Up-to-date Resource for the Molecular Sciences Community*. *J. Chem. Inf. Model.* **2019**, *59*, 4814–4820.

(11) Hopmann, K. H. How Accurate is DFT for Iridium-Mediated Chemistry? *Organometallics*, **2016**, *35*, 3795–3807.

(12) Grimme, S. Semiempirical GGA-type density functional constructed with a long-range dispersion correction, *J. Comp. Chem.* **2006**, *27*, 1787–1799.

(13) Grimme, S.; Ehrlich S.; Goerigk, F. Effect of the damping function in dispersion corrected density functional theory. *J. Comp. Chem.* **2011**, *32*, 1456–1465.

(14) Biosca, M.; Paptchikhine, A.; Pamies, O.; Andersson, P. G.; Dieguez, M. Extending the Substrate Scope of Bicyclic P-Oxazoline/Thiazole Ligands for Ir-Catalyzed Hydrogenation of Unfunctionalized Olefins by Introducing a Biaryl Phosphoroamidite Group. *Chem. - Eur. J.* **2015**, *21*, 3455–3464.

(15) Gupton, J. T.; Layman, W. J. Reaction of 2-aryl-3-(N,N-dimethylamino)-1-propenes and their corresponding quaternary ammonium salts with organometallic species and reducing agents. *J. Org. Chem.* **1987**, *52*, 3683–3686.

(16) Biosca, M.; Salomó, E.; de la Cruz-Sánchez, P.; Riera, A.; Verdaguer, X.; Pamies, O.; Diéguez, M. Extending the Substrate Scope in the Hydrogenation of Unfunctionalized Tetrasubstituted Olefins with Ir-P Stereogenic Aminophosphine–Oxazoline Catalysts. *Org. Lett.* **2019**, *21*, 807–811.

(17) Berthiol, F.; Doucet, H.; Santelli, M. Synthesis of Polysubstituted Alkenes by Heck Vinylation or Suzuki Cross-Coupling Reactions in the Presence of a Tetraphosphane–Palladium Catalyst. *Eur. J. Org. Chem.* **2003**, 1091–1096.

(18) Yanagisawa, A.; Nezu, T.; Mohri, S.-I. Brønsted Acid-Promoted Hydrocyanation of Arylalkenes. *Org. Lett.* **2009**, *11*, 5286–5289.

(19) Schrems, M. G.; Pfaltz, A. NeoPHOX—an easily accessible P,N-ligand for iridium-catalyzed asymmetric hydrogenation: preparation, scope and application in the synthesis of demethyl methoxycalamenene. *Chem. Commun.* **2009**, 6210–6212.

- (20) Tolstoy, P.; Engman, M.; Paptchikhine, A.; Bergquist, J.; Church, T. L.; Leung, A. W. M.; Andersson, P. G. Iridium-Catalyzed Asymmetric Hydrogenation Yielding Chiral Diarylmethines with Weakly Coordinating or Noncoordinating Substituents. *J. Am. Chem. Soc.* **2009**, *131*, 8855–8860.
- (21) Terao, Y.; Nomoto, M.; Satoh, T.; Miura, M.; Nomura, M. Palladium-Catalyzed Dehydroarylation of Triarylmethanols and Their Coupling with Unsaturated Compounds Accompanied by C–C Bond Cleavage. *J. Org. Chem.* **2004**, *69*, 6942–6944.
- (22) Xia, J.; Guoqiang, Y.; Zhuge, R.; Liu, Y.; Zhang, W. Iridium-Catalyzed Asymmetric Hydrogenation of Unfunctionalized Exocyclic C=C Bonds. *Chem. Eur. J.* **2016**, *22*, 18354–18359.
- (23) Biosca, M.; de la Cruz-Sánchez, P.; Tarr, D.; Llanes, P.; Karlsson, E. A.; Margalef, J.; Pàmies, O.; Pericàs, M. A.; Diéguez, M. Filling the Gaps in the Challenging Asymmetric Hydrogenation of Exocyclic Benzofused Alkenes with Ir–P,N Catalysts. *Adv. Synth. Catal.* **2022**, <https://doi.org/10.1002/adsc.202200870>.
- (24) Too, P. C.; Noji, T.; Lim, Y. J.; Li, X.; Chiba, S. Rhodium(III)-Catalyzed Synthesis of Pyridines from  $\alpha,\beta$ -Unsaturated Ketoximes and Internal Alkynes. *Synlett* **2011**, 2789–2794.
- (25) Lu, S. M.; Bolm, C. Highly Enantioselective Synthesis of Optically Active Ketones by Iridium-Catalyzed Asymmetric Hydrogenation. *Angew. Chem. Int. Ed.* **2008**, *47*, 8920–8923.
- (26) Ponra, S.; Yang, J.; Kerdphon, S.; Andersson, P. G. Asymmetric Synthesis of Alkyl Fluorides: Hydrogenation of Fluorinated Olefins. *Angew. Chem. Int. Ed.* **2019**, *58*, 9282–9287.
- (27) Lu, S.-M.; Bolm, C. Highly Chemo- and Enantioselective Hydrogenation of Linear  $\alpha,\beta$ -Unsaturated Ketones. *Chem. - Eur. J.* **2008**, *14*, 7513–7516.
- (28) Ganić, A.; Pfaltz, A. Iridium-Catalyzed Enantioselective Hydrogenation of Alkenylboronic Esters. *Chem. Eur. J.* **2012**, *18*, 6724–6728.
- (29) Cheruku, P.; Diesen, J.; Andersson, P. G. Asymmetric Hydrogenation of Di and Trisubstituted Enol Phosphinates with N,P- Ligated Iridium Complexes. *J. Am. Chem. Soc.* **2008**, *130*, 5595–5599.
- (30) Galambos, J.; Wágner, G.; Nógrádi, K.; Bielik, A.; Molnár, L.; Bobok, A.; Horváth, A.; Kiss, B.; Kolok, S.; Nagy, J.; Kurkó, D.; Bakk, M. L.; Vastag, M.; Sághy, K.; Gyertyán, I.; Gál, K.; Greiner, I.; Szombathelyi, Z.; Keserű, G. M.; Domány, G. Carbamoyloximes as novel non-competitive mGlu5 receptor antagonists. *Bioorg. Med. Chem. Lett.* **2010**, *20*, 4371–4375.
- (31) Peters, B. B. C.; Jongcharoenkamol, J.; Krajangsri, S.; Andersson, P. G. Highly Enantioselective Iridium-Catalyzed Hydrogenation of Conjugated Trisubstituted Enones. *Org. Lett.* **2021**, *23*, 242–246.
- (32) Fengtao, T.; Dongmei, Y.; Yuanyuan, L.; Fang, X.; Wanbin, Z. Iridium-Catalyzed Highly Enantioselective Hydrogenation of Exocyclic  $\alpha,\beta$ -Unsaturated Carbonyl Compounds. *Adv. Synth. Catal.* **2010**, *352*, 1841–1845.
- (33) Margalef, J.; Biosca, M.; de la Cruz-Sánchez, P.; Caldentey, X.; Rodríguez-Escrich, C.; Pàmies, O.; Pericàs, M. A.; Diéguez, M. Indene Derived Phosphorus-Thioether Ligands for the Ir-Catalyzed

Asymmetric Hydrogenation of Olefins with Diverse Substitution Patterns and Different Functional Groups. *Adv. Synth. Catal.* **2021**, *363*, 4561–4574.

(34) Liu, X.; Han, Z.; Wang, Z.; Ding, K. SpinPhox/Iridium(I)-Catalyzed Asymmetric Hydrogenation of Cyclic  $\alpha$ -Alkylidene Carbonyl Compounds. *Angew. Chem. Int. Ed.* **2014**, *53*, 1978–1982.

(35) Ponra, S.; Rabten, W.; Yang, J.; Wu, H.; Kerdphon, S.; Andersson, P. G. Diastereo- and enantioselective synthesis of fluorine motifs with two contiguous stereogenic centers. *J. Am. Chem. Soc.* **2018**, *140*, 13878–13883.

(36) Kerdphon, S.; Ponra, S.; Yang, J.; Wu, H.; Eriksson, L.; Andersson, P. G. Diastereo- and Enantioselective Synthesis of Structurally Diverse Succinate, Butyrolactone, and Trifluoromethyl Derivatives by Iridium-Catalyzed Hydrogenation of Tetrasubstituted Olefins. *ACS Catal.* **2019**, *9*, 6169–6176.

(37) Nakatsuji, H.; Ashida, Y.; Hori, H.; Sato, Y.; Honda, A.; Taira, M.; Tanabe, Y. (E)- and (Z)-stereodefined enol phosphonates derived from  $\beta$ -ketoesters: stereocomplementary synthesis of fully-substituted  $\alpha,\beta$ -unsaturated esters. *Org. Biomol. Chem.*, **2015**, *13*, 8205–8210.

(38) Bigler, R.; Mack, K. A.; Shen, J.; Tosatti, P.; Han, C.; Bachmann, S.; Zhang, H.; Scalone, M.; Pfaltz, A.; Denmark, S. E.; Hildbrand, S.; Gosselin, F. Asymmetric Hydrogenation of Unfunctionalized Tetrasubstituted Acyclic Olefins. *Angew. Chem. Int. Ed.* **2020**, *59*, 2844–2849.

(39) Lightfoot, A.; Schnider, P.; Pfaltz, A. Enantioselective Hydrogenation of Olefins with Iridium-Phosphanodihydrooxazole Catalysts. *Angew. Chem. Int. Ed.* **1998**, *37*, 2897–2899.

(40) Källström, K.; Hedberg, C.; Brandt, P.; Bayer, A.; Andersson, P. G. Rationally Designed Ligands for Asymmetric Iridium-Catalyzed Hydrogenation of Olefins. *J. Am. Chem. Soc.* **2004**, *126*, 14308–14309.

(41) Woodmansee, D. H.; Muller, M.-A.; Neuburger, M.; Pfaltz, A. Chiral pyridyl phosphinites with large aryl substituents as efficient ligands for the asymmetric iridium-catalyzed hydrogenation of difficult substrates. *Chem. Sci.* **2010**, *1*, 72–78.

(42) Wang, A.; Fraga, R. P. A.; Hörmann, E.; Pfaltz, A. Iridium-Catalyzed Asymmetric Hydrogenation of Unfunctionalized, Trialkyl-Substituted Olefins. *Chem. Asian J.* **2011**, *6*, 599–606.

(43) Bell, S.; Wüstenberg, B.; Kaiser, S.; Menges, F.; Netscher, F.; Netscher, T.; Pfaltz, A. Asymmetric Hydrogenation of Unfunctionalized, Purely Alkyl-Substituted Olefins. *Science*, **2006**, *311*, 642–644.

(44) Lu, W. J.; Hou, X. L. Highly Enantioselective Construction of the  $\alpha$ -Chiral Center of Amides via Iridium-Catalyzed Hydrogenation of  $\alpha,\beta$ -Unsaturated Amides. *Adv. Synth. Catal.* **2009**, *351*, 1224–1228.

(45) Cheruku, P.; Gohil, S.; Andersson, P. G. Asymmetric hydrogenation of enol phosphinates by iridium catalysts having N,P ligands. *Org. Lett.* **2007**, *9*, 1659–1661.



- (46) Biosca, M.; Magre, M.; Coll, M.; Pàmies, O.; Diéguez, M. Alternatives to Phosphinooxazoline (t-BuPHOX) Ligands in the Metal-Catalyzed Hydrogenation of Minimally Functionalized Olefins and Cyclic  $\beta$ -Enamides. *Adv. Synth. Catal.* **2017**, *359*, 2801–2814.
- (47) Durkin, K.; Liotta, D.; Rancourt, J.; Lavalley, J. F.; Boisvert, L.; Guindon, Y. Stereoselective hydrogen-transfer reactions involving acyclic radicals. A study of radical conformations using semiempirical calculations. *J. Am. Chem. Soc.* **1992**, *114*, 4912–4914.
- (48) Malmedy, F.; Wirth, T. Stereoselective Ketone Rearrangements with Hypervalent Iodine Reagents. *Chem. Eur. J.* **2016**, *22*, 16072–16077.
